# Supplementary material
Source: PubMed Central journal article supplement (PMC6158049)
Supplement: NIHMS977828-supplement-Supp_TableS1-3.pdf [file NIHMS977828-supplement-Supp_TableS1-3.pdf]

Supplemental Table 1: Primers used in the study

| Name       | Sequence (5' to 3')     |
|------------|-------------------------|
| AB57_0091+ | GGGTTTATCGGCGCTTTAATTG  |
| AB57_0091- | GGAACGAGGTACTGTTGCATAG  |
| AB57_1479+ | GGCTAAGAGAGAAAAGCGTACAA |
| AB57_1479- | CTTTCGCTTCTTTCGCATCAC   |
| AB57_1527+ | TCTGTGTGCATCGGGTTTAG    |
| AB57_1527- | AACGCTTCGGTCGGTTTAG     |
| AB57_16S+  | CAGCTCGTGTGAGATGT       |
| AB57_16S-  | CGTAAGGGCCATGATGACTT    |
| AB57_2007+ | GGTGCTCAAGCTAACTCTCAA   |
| AB57_2007- | CAGCAGTAGAAGCACCAGTT    |
| AB57_2570+ | GCTGCACGTACAAACCTTTATG  |
| AB57_2570- | TTGGTGTACCTGTGTTGGAG    |

Supplemental Table 2: Complete table of transcript data from *P. gingivalis* and *A. baumannii*

| PGN      | Gene   | Product                                                                 | log2 Fold Change | p-value  | q-value  |
|----------|--------|-------------------------------------------------------------------------|------------------|----------|----------|
| PGN_0001 | dnaA   | chromosomal replication initiator protein DnaA                          | -0.31276         | 0.3026   | 0.419359 |
| PGN_0002 |        | conserved hypothetical protein                                          | -0.206714        | 0.46085  | 0.575792 |
| PGN_0003 |        | conserved hypothetical protein                                          | 0.577411         | 0.06255  | 0.117226 |
| PGN_0004 |        | putative nicotinate mononucleotide:5,6-dimethylbenzimidazole phosphorib | -1.70588         | 5.00E-05 | 0.00026  |
| PGN_0005 |        | conserved hypothetical protein                                          | 1.20939          | 5.00E-05 | 0.00026  |
| PGN_0006 |        | putative Na <sup>+</sup> -driven multidrug efflux pump                  | 0.587552         | 0.03535  | 0.07321  |
| PGN_0007 |        | hypothetical protein                                                    | -0.799151        | 0.0542   | 0.103398 |
| PGN_0008 | clpC   | ATP-dependent Clp protease ATP-binding subunit ClpC                     | -2.15603         | 5.00E-05 | 0.00026  |
| PGN_0009 |        | glycosyl hydrolase family 3                                             | -0.90838         | 0.00255  | 0.007891 |
| PGN_0010 |        | probable L-threonine-O-3-phosphate decarboxylase                        | 0.081122         | 0.77955  | 0.848932 |
| PGN_0011 |        | conserved hypothetical protein                                          | 0.455126         | 0.0976   | 0.167034 |
| PGN_0012 |        | two-component system response regulator                                 | 0.523943         | 0.06555  | 0.121657 |
| PGN_0013 |        | putative two-component system sensor histidine kinase                   | 1.25406          | 5.00E-05 | 0.00026  |
| PGN_0014 |        | conserved hypothetical protein                                          | 1.58567          | 5.00E-05 | 0.00026  |
| PGN_0015 |        | probable transcriptional regulator                                      | -0.90761         | 0.07175  | 0.130672 |
| PGN_0016 |        | putative TIM-barrel protein                                             | -0.228265        | 0.70835  | 0.796239 |
| PGN_0017 |        | sulfate transporter permease                                            | 0.177185         | 0.7379   | 0.817427 |
| PGN_0018 |        | hypothetical protein                                                    | 1.69181          | 0.09645  | 0.165465 |
| PGN_0019 |        | hypothetical protein                                                    | 0.311715         | 0.8001   | 0.862924 |
| PGN_0020 |        | probable DNA-binding protein                                            | -0.635194        | 0.0304   | 0.065244 |
| PGN_0021 |        | probable hydrolase                                                      | 0.48924          | 0.0937   | 0.162185 |
| PGN_0022 | porU   | Por secretion system protein porU                                       | 1.22292          | 0.00025  | 0.00108  |
| PGN_0023 | porV   | Por secretion system protein porV (pg27, lptO)                          | 1.72454          | 5.00E-05 | 0.00026  |
| PGN_0024 | ispF   | putative 2C-methyl-D-erythritol 2,4-cyclodiphosphate synthase           | 1.35228          | 5.00E-05 | 0.00026  |
| PGN_0025 |        | probable SpoU rRNA methylase family protein                             | -0.56049         | 0.05395  | 0.103106 |
| PGN_0026 |        | putative cytidine deaminase                                             | -1.39022         | 5.00E-05 | 0.00026  |
| PGN_0027 |        | transposase in ISPg1                                                    | -2.36099         | 5.00E-05 | 0.00026  |
| PGN_0028 |        | hypothetical protein                                                    | -1.34358         | 0.0015   | 0.004944 |
| PGN_0029 |        | conserved hypothetical protein                                          | -0.300144        | 0.30275  | 0.419359 |
| PGN_0030 |        | beta-mannosidase                                                        | -0.196418        | 0.4656   | 0.580025 |
| PGN_0031 |        | conserved hypothetical protein with RmuC domain                         | -0.0314477       | 0.9048   | 0.938295 |
| PGN_0032 |        | conserved hypothetical protein                                          | -0.250104        | 0.6238   | 0.725325 |
| PGN_0033 |        | thioredoxin                                                             | -1.22917         | 0.00115  | 0.003911 |
| PGN_0034 |        | DNA polymerase III alpha subunit                                        | -0.56406         | 0.0613   | 0.115391 |
| PGN_0035 | rplS   | 50S ribosomal protein L19                                               | 2.58517          | 5.00E-05 | 0.00026  |
| PGN_0036 |        | hypothetical protein                                                    | -1.06125         | 0.0009   | 0.003178 |
| PGN_0037 |        | conserved hypothetical protein                                          | 0.00254296       | 0.98945  | 0.991312 |
| PGN_0038 | glyA   | serine hydroxymethyltransferase                                         | 0.632302         | 0.0344   | 0.071661 |
| PGN_0039 |        | beta-hexosaminidase                                                     | 0.0765989        | 0.79015  | 0.856969 |
| PGN_0040 |        | hypothetical protein                                                    | -0.867723        | 0.05815  | 0.110144 |
| PGN_0041 | htpG   | heat shock protein 90                                                   | -0.0921516       | 0.75165  | 0.828293 |
| PGN_0042 |        | probable phosphatidate cytidylyltransferase                             | -1.17536         | 0.00065  | 0.00239  |
| PGN_0043 |        | putative transmembrane AAA-metalloprotease FtsH                         | -1.6019          | 5.00E-05 | 0.00026  |
| PGN_0044 |        | GTP-binding protein                                                     | -0.168025        | 0.55635  | 0.666181 |
| PGN_0045 |        | conserved hypothetical protein                                          | 1.39085          | 0.0115   | 0.028602 |
| PGN_0046 |        | hypothetical protein                                                    | 0.437533         | 0.429    | 0.545278 |
| PGN_0047 |        | conserved hypothetical protein                                          | -1.07898         | 0.10075  | 0.171735 |
| PGN_0048 |        | conserved hypothetical protein                                          | -0.0339944       | 0.93385  | 0.956208 |
| PGN_0049 |        | probable anti-restriction protein                                       | -0.995034        | 0.0797   | 0.14235  |
| PGN_0050 |        | conserved hypothetical protein                                          | -0.921216        | 0.02075  | 0.047298 |
| PGN_0051 |        | conserved hypothetical protein                                          | -2.19231         | 0.00125  | 0.004224 |
| PGN_0052 |        | hypothetical protein                                                    | -0.899609        | 0.034    | 0.070967 |
| PGN_0053 |        | conserved hypothetical protein                                          | -0.51947         | 0.0986   | 0.168475 |
| PGN_0054 |        | hypothetical protein                                                    | -1.97665         | 5.00E-05 | 0.00026  |
| PGN_0055 |        | probable lysozyme                                                       | -2.18931         | 5.00E-05 | 0.00026  |
| PGN_0056 |        | probable conserved protein found in conjugate transposon                | -0.663437        | 0.41905  | 0.536475 |
| PGN_0057 | traP_1 | probable conserved protein found in conjugate transposon TraP           | -1.25834         | 0.00025  | 0.00108  |
| PGN_0058 |        | probable conserved protein found in conjugate transposon                | -1.09091         | 0.03995  | 0.081081 |
| PGN_0059 | traN_1 | conserved protein found in conjugate transposon TraN                    | -1.32619         | 5.00E-05 | 0.00026  |
| PGN_0060 | traM_1 | conserved protein found in conjugate transposon TraM                    | -1.27226         | 5.00E-05 | 0.00026  |
| PGN_0061 |        | hypothetical protein                                                    | -0.918222        | 0.48055  | 0.59344  |

|          |        |                                                                              |            |          |          |
|----------|--------|------------------------------------------------------------------------------|------------|----------|----------|
| PGN_0062 | traK_1 | putative conserved protein found in conjugate transposon TraK                | -0.921548  | 0.18895  | 0.28899  |
| PGN_0063 | traJ_1 | conserved transmembrane protein found in conjugate transposon TraJ           | -0.851446  | 0.0026   | 0.008022 |
| PGN_0064 | traI_1 | putative conserved protein found in conjugate transposon TraI                | -0.702813  | 0.01935  | 0.04444  |
| PGN_0065 | traG   | conserved protein found in conjugate transposon TraG                         | -1.23245   | 0.0001   | 0.000483 |
| PGN_0066 | traF_1 | probable conserved transmembrane protein found in conjugate transposon       | 0.0502714  | 0.8614   | 0.906535 |
| PGN_0068 |        | hypothetical protein                                                         | -1.54075   | 5.00E-05 | 0.00026  |
| PGN_0069 | traA_1 | probable conserved protein found in conjugate transposon TraA                | -1.01945   | 0.01125  | 0.028112 |
| PGN_0070 |        | hypothetical protein                                                         | -0.759222  | 0.05655  | 0.107495 |
| PGN_0071 |        | hypothetical protein                                                         | -0.837239  | 0.0908   | 0.158194 |
| PGN_0072 |        | hypothetical protein                                                         | -1.22684   | 0.01265  | 0.03085  |
| PGN_0074 |        | conserved hypothetical protein                                               | -0.639529  | 0.25375  | 0.365764 |
| PGN_0075 |        | conserved hypothetical protein                                               | -0.308339  | 0.38145  | 0.499582 |
| PGN_0076 |        | putative mobilization protein TraG family                                    | -0.102126  | 0.7123   | 0.798319 |
| PGN_0077 |        | hypothetical protein                                                         | -1.16895   | 5.00E-05 | 0.00026  |
| PGN_0078 |        | hypothetical protein                                                         | -1.02059   | 0.00105  | 0.003606 |
| PGN_0079 |        | conserved hypothetical protein with DUF1016 domain                           | -1.26466   | 0.00045  | 0.001764 |
| PGN_0080 |        | probable tetracycline resistance element mobilization regulatory protein Rtc | -0.521884  | 0.0664   | 0.123034 |
| PGN_0081 |        | putative Na driven multidrug efflux pump                                     | 0.266416   | 0.36015  | 0.479225 |
| PGN_0082 |        | probable transcriptional regulator AraC family                               | -0.331875  | 0.2783   | 0.393378 |
| PGN_0083 |        | conserved hypothetical protein                                               | -0.645539  | 0.0212   | 0.048067 |
| PGN_0084 |        | DNA topoisomerase I                                                          | -1.08413   | 0.00015  | 0.000685 |
| PGN_0085 |        | hypothetical protein                                                         | -0.712641  | 0.6311   | 0.731416 |
| PGN_0086 |        | putative DNA methylase                                                       | -0.601366  | 0.03335  | 0.07016  |
| PGN_0087 |        | conserved hypothetical protein                                               | -1.18529   | 0.00055  | 0.002076 |
| PGN_0088 |        | putative transcriptional regulator                                           | -1.36922   | 0.1984   | 0.301279 |
| PGN_0089 |        | hypothetical protein                                                         | -0.138609  | 0.79485  | 0.858132 |
| PGN_0090 |        | hypothetical protein                                                         | 0.0696362  | 0.8796   | 0.920683 |
| PGN_0091 |        | hypothetical protein                                                         | -0.939875  | 0.00065  | 0.00239  |
| PGN_0092 |        | conserved hypothetical protein                                               | -1.12442   | 0.0001   | 0.000483 |
| PGN_0093 |        | conserved hypothetical protein                                               | 0.221169   | 0.4421   | 0.558326 |
| PGN_0094 |        | putative bacteriophage integrase                                             | -0.197166  | 0.48675  | 0.598666 |
| PGN_0095 |        | hypothetical protein                                                         | -0.0291627 | 0.93035  | 0.953642 |
| PGN_0096 |        | aspartate kinase                                                             | -0.544003  | 0.06125  | 0.115391 |
| PGN_0097 |        | putative cell-division ATP-binding protein                                   | -1.17366   | 0.00025  | 0.00108  |
| PGN_0098 |        | hypothetical protein                                                         | -2.69714   | 0.0098   | 0.024987 |
| PGN_0099 |        | probable peptidase                                                           | 1.48918    | 5.00E-05 | 0.00026  |
| PGN_0100 |        | diaminopimelate decarboxylase                                                | -1.31074   | 5.00E-05 | 0.00026  |
| PGN_0101 |        | putative 1,4-dihydroxy-2-naphthoate octaprenyltransferase                    | -0.781509  | 0.44115  | 0.558056 |
| PGN_0102 |        | conserved hypothetical protein                                               | -1.67431   | 5.00E-05 | 0.00026  |
| PGN_0103 |        | putative TonB                                                                | -1.26353   | 0.0001   | 0.000483 |
| PGN_0104 |        | transposase in ISPg1                                                         | -2.32402   | 5.00E-05 | 0.00026  |
| PGN_0105 |        | conserved hypothetical protein                                               | -0.536697  | 0.36175  | 0.480652 |
| PGN_0106 |        | partial transposase in ISPg3                                                 | -0.388515  | 0.19085  | 0.291478 |
| PGN_0107 |        | partial transposase in ISPg3                                                 | -1.31066   | 0.16055  | 0.252819 |
| PGN_0108 |        | partial transposase in ISPg1                                                 | -2.36929   | 0.0006   | 0.002241 |
| PGN_0109 |        | conserved hypothetical protein                                               | 1.55052    | 0.1051   | 0.177727 |
| PGN_0110 |        | hypothetical protein                                                         | 1.1618     | 0.0008   | 0.002848 |
| PGN_0111 |        | partial transposase in ISPg6                                                 | 0.170235   | 0.7004   | 0.791062 |
| PGN_0112 |        | partial transposase Orf1 in ISPg5                                            | -1.2998    | 0.00025  | 0.00108  |
| PGN_0113 |        | hypothetical protein                                                         | -0.898508  | 0.0516   | 0.099508 |
| PGN_0114 |        | Na translocating NADH-quinone reductase subunit A                            | 0.168165   | 0.5593   | 0.668585 |
| PGN_0115 |        | Na translocating NADH-quinone reductase subunit B                            | 0.0307391  | 0.9169   | 0.946234 |
| PGN_0116 |        | probable Na translocating NADH-quinone reductase subunit C                   | 0.668024   | 0.0185   | 0.042672 |
| PGN_0117 |        | putative Na translocating NADH-quinone reductase subunit D                   | 0.711593   | 0.0105   | 0.026581 |
| PGN_0118 |        | putative Na translocating NADH-quinone reductase subunit E                   | 1.09904    | 5.00E-05 | 0.00026  |
| PGN_0119 |        | Na translocating NADH-quinone reductase subunit F                            | 1.19023    | 0.00025  | 0.00108  |
| PGN_0120 |        | conserved hypothetical protein                                               | 1.13242    | 0.00025  | 0.00108  |
| PGN_0121 |        | conserved hypothetical protein                                               | 1.14528    | 0.0004   | 0.001607 |
| PGN_0122 |        | 28 kDa outer membrane protein Omp28                                          | 0.382616   | 0.5588   | 0.668362 |
| PGN_0123 |        | conserved hypothetical protein                                               | -1.16504   | 0.003    | 0.009047 |
| PGN_0124 |        | hypothetical protein                                                         | -0.370021  | 0.25985  | 0.373545 |
| PGN_0125 |        | D-isomer specific 2-hydroxyacid dehydrogenase family protein                 | -0.578723  | 0.04895  | 0.095522 |

|          |      |                                                           |           |          |          |
|----------|------|-----------------------------------------------------------|-----------|----------|----------|
| PGN_0126 |      | putative transmembrane glucose/galactose transporter      | 0.753331  | 0.0129   | 0.031316 |
| PGN_0127 |      | hypothetical protein                                      | 0.269208  | 0.5188   | 0.632966 |
| PGN_0128 |      | immunoreactive 53 kDa antigen                             | 0.0577569 | 0.8493   | 0.898688 |
| PGN_0129 |      | conserved hypothetical protein                            | 0.249152  | 0.389    | 0.507153 |
| PGN_0130 |      | partial transposase in ISPg1                              | -2.33488  | 5.00E-05 | 0.00026  |
| PGN_0131 |      | partial transposase in ISPg1                              | -2.73925  | 5.00E-05 | 0.00026  |
| PGN_0132 |      | conserved hypothetical protein                            | 0.358653  | 0.34105  | 0.459845 |
| PGN_0133 |      | adenosylmethionine--8-amino-7-oxononoate aminotransferase | 0.204695  | 0.60945  | 0.711359 |
| PGN_0134 |      | putative biotin synthetase                                | 0.556734  | 0.1856   | 0.285172 |
| PGN_0135 |      | putative H <sup>+</sup> /peptide symporter                | 1.31621   | 0.0002   | 0.000895 |
| PGN_0136 |      | conserved hypothetical protein                            | 0.513125  | 0.0768   | 0.138097 |
| PGN_0137 |      | putative tryptophanyl-tRNA synthetase                     | 0.628133  | 0.0389   | 0.07948  |
| PGN_0138 |      | conserved hypothetical protein                            | 0.396382  | 0.29595  | 0.412895 |
| PGN_0139 |      | conserved hypothetical protein                            | 0.422582  | 0.3937   | 0.51109  |
| PGN_0140 |      | peptide methionine sulfoxide reductase                    | 1.13709   | 0.00025  | 0.00108  |
| PGN_0141 |      | conserved hypothetical protein                            | 1.17963   | 5.00E-05 | 0.00026  |
| PGN_0142 |      | putative cation efflux protein                            | 1.73572   | 5.00E-05 | 0.00026  |
| PGN_0143 |      | probable dihydroneopterin aldolase                        | 0.593978  | 0.0344   | 0.071661 |
| PGN_0144 |      | hypothetical protein                                      | -0.689759 | 0.0186   | 0.042857 |
| PGN_0145 |      | conserved hypothetical protein                            | 0.434336  | 0.1379   | 0.222753 |
| PGN_0146 |      | hypothetical protein                                      | 1.83645   | 0.0098   | 0.024987 |
| PGN_0147 |      | conserved hypothetical protein                            | 0.623313  | 0.02405  | 0.053005 |
| PGN_0148 |      | conserved hypothetical protein                            | 0.587415  | 0.0434   | 0.086678 |
| PGN_0149 |      | ribose-phosphate pyrophosphokinase                        | 0.919991  | 0.00185  | 0.00595  |
| PGN_0150 |      | putative ATP-dependent RNA helicase                       | 0.417496  | 0.1416   | 0.227866 |
| PGN_0151 |      | conserved hypothetical protein                            | -1.83591  | 5.00E-05 | 0.00026  |
| PGN_0152 |      | immunoreactive 61 kDa antigen                             | -2.02252  | 5.00E-05 | 0.00026  |
| PGN_0153 |      | conserved hypothetical protein                            | -2.58374  | 5.00E-05 | 0.00026  |
| PGN_0154 |      | conserved hypothetical protein                            | 2.88584   | 5.00E-05 | 0.00026  |
| PGN_0155 |      | hypothetical protein                                      | 0.825313  | 0.0264   | 0.057411 |
| PGN_0156 |      | conserved hypothetical protein                            | -0.042848 | 0.8901   | 0.929089 |
| PGN_0157 | thiH | putative thiamine biosynthesis protein ThiH               | -1.45769  | 5.00E-05 | 0.00026  |
| PGN_0158 | thiG | putative thiazole biosynthesis protein ThiG               | -2.47931  | 5.00E-05 | 0.00026  |
| PGN_0159 |      | probable thiamin-phosphate pyrophosphorylase              | -1.57236  | 0.00275  | 0.008448 |
| PGN_0160 |      | thiamine biosynthesis protein                             | -1.52294  | 0.00035  | 0.001436 |
| PGN_0161 |      | putative thiamine biosynthesis protein ThiS               | 0.362545  | 0.3286   | 0.447949 |
| PGN_0162 |      | conserved hypothetical protein                            | -0.51578  | 0.11795  | 0.195573 |
| PGN_0163 |      | hypothetical protein                                      | -1.8145   | 5.00E-05 | 0.00026  |
| PGN_0164 |      | conserved hypothetical protein                            | 1.79925   | 0.0055   | 0.015307 |
| PGN_0165 |      | conserved hypothetical protein                            | 2.44857   | 0.0029   | 0.008858 |
| PGN_0166 |      | conserved hypothetical protein                            | 2.7094    | 0.00015  | 0.000685 |
| PGN_0167 | rpsP | 30S ribosomal protein S16                                 | 2.38962   | 5.00E-05 | 0.00026  |
| PGN_0168 |      | lipopolysaccharide biosynthesis protein WbpB              | -0.268405 | 0.3402   | 0.459394 |
| PGN_0169 |      | probable metallo-beta-lactamase superfamily protein       | 1.353     | 5.00E-05 | 0.00026  |
| PGN_0170 |      | L-asparaginase                                            | 1.29102   | 5.00E-05 | 0.00026  |
| PGN_0171 |      | partial transposase in ISPg2                              | 1.15133   | 0.0523   | 0.100584 |
| PGN_0172 |      | conserved hypothetical protein                            | -0.72962  | 0.02925  | 0.062966 |
| PGN_0173 |      | glyceraldehyde 3-phosphate dehydrogenase type I           | -0.781482 | 0.01595  | 0.037689 |
| PGN_0174 |      | probable transcriptional regulator AraC family            | 1.4165    | 5.00E-05 | 0.00026  |
| PGN_0175 |      | conserved hypothetical protein                            | 0.961485  | 0.01335  | 0.032188 |
| PGN_0176 |      | conserved hypothetical protein                            | 0.937963  | 0.0394   | 0.080194 |
| PGN_0177 |      | hypothetical protein                                      | -0.91062  | 0.04145  | 0.083965 |
| PGN_0178 |      | conserved hypothetical protein                            | -3.40036  | 5.00E-05 | 0.00026  |
| PGN_0179 |      | 60 kDa protein                                            | -3.61951  | 5.00E-05 | 0.00026  |
| PGN_0180 | fimA | FimA type I fimbrilin                                     | -4.41145  | 5.00E-05 | 0.00026  |
| PGN_0181 |      | conserved hypothetical protein                            | -3.5532   | 5.00E-05 | 0.00026  |
| PGN_0182 |      | conserved hypothetical protein                            | -1.77212  | 0.03075  | 0.065928 |
| PGN_0183 | fimC | minor component FimC                                      | -1.83071  | 5.00E-05 | 0.00026  |
| PGN_0184 | fimD | minor component FimD                                      | -1.79448  | 0.00025  | 0.00108  |
| PGN_0185 | fimE | minor component FimE                                      | -1.2907   | 0.00145  | 0.004794 |
| PGN_0186 |      | hypothetical protein                                      | -1.7883   | 0.00485  | 0.013786 |
| PGN_0187 |      | conserved hypothetical protein                            | 1.23709   | 0.0002   | 0.000895 |

|          |      |                                                                           |            |          |          |
|----------|------|---------------------------------------------------------------------------|------------|----------|----------|
| PGN_0188 | rpmF | 50S ribosomal protein L32                                                 | 1.23731    | 5.00E-05 | 0.00026  |
| PGN_0189 |      | beta-ketoacyl-acyl-carrier-protein synthase III                           | 1.26476    | 0.0002   | 0.000895 |
| PGN_0190 | era  | putative GTP-binding protein                                              | 1.46095    | 5.00E-05 | 0.00026  |
| PGN_0191 | engA | GTP-binding protein EngA                                                  | 1.65962    | 5.00E-05 | 0.00026  |
| PGN_0192 |      | conserved hypothetical protein                                            | 1.88712    | 5.00E-05 | 0.00026  |
| PGN_0193 |      | putative polysaccharide deacetylase                                       | 2.33549    | 5.00E-05 | 0.00026  |
| PGN_0194 |      | conserved hypothetical protein                                            | 1.6138     | 5.00E-05 | 0.00026  |
| PGN_0195 |      | putative xanthine phosphoribosyltransferase                               | 1.81218    | 5.00E-05 | 0.00026  |
| PGN_0196 |      | xanthine/uracil permease                                                  | 1.13646    | 5.00E-05 | 0.00026  |
| PGN_0197 |      | conserved hypothetical protein                                            | 0.407552   | 0.14575  | 0.233821 |
| PGN_0198 |      | conserved hypothetical protein                                            | 0.880483   | 0.003    | 0.009047 |
| PGN_0199 |      | hypothetical protein                                                      | -0.777256  | 0.00635  | 0.01731  |
| PGN_0200 |      | conserved hypothetical protein                                            | -0.795351  | 0.0075   | 0.020009 |
| PGN_0201 |      | conserved hypothetical protein with DUF558 domain                         | -1.32677   | 5.00E-05 | 0.00026  |
| PGN_0202 |      | probable leucine aminopeptidase precursor                                 | 1.08659    | 0.00035  | 0.001436 |
| PGN_0203 |      | probable SufE Fe/S-cluster-related protein                                | 1.13829    | 0.00015  | 0.000685 |
| PGN_0204 |      | protoporphyrinogen oxidase                                                | 0.958795   | 0.0008   | 0.002848 |
| PGN_0205 |      | conserved hypothetical protein                                            | 1.80144    | 0.03195  | 0.067954 |
| PGN_0206 |      | putative lipid A disaccharide synthase                                    | 1.72407    | 5.00E-05 | 0.00026  |
| PGN_0207 | surE | probable stationary-phase survival protein                                | 0.981522   | 0.16175  | 0.254332 |
| PGN_0208 |      | conserved hypothetical protein                                            | 0.875888   | 0.22835  | 0.335744 |
| PGN_0209 |      | glycyl-tRNA synthetase                                                    | 0.692008   | 0.0777   | 0.139245 |
| PGN_0210 |      | transposase in ISPg1                                                      | -2.47664   | 5.00E-05 | 0.00026  |
| PGN_0211 |      | conserved hypothetical protein                                            | -1.73465   | 5.00E-05 | 0.00026  |
| PGN_0212 |      | transposase in ISPg1                                                      | -2.39537   | 5.00E-05 | 0.00026  |
| PGN_0213 |      | conserved hypothetical protein                                            | -2.50482   | 5.00E-05 | 0.00026  |
| PGN_0214 |      | conserved hypothetical protein                                            | 0.913636   | 0.29655  | 0.41319  |
| PGN_0215 |      | conserved hypothetical protein                                            | 0.572931   | 0.3995   | 0.515918 |
| PGN_0216 |      | conserved hypothetical protein                                            | -1.39592   | 5.00E-05 | 0.00026  |
| PGN_0217 |      | conserved hypothetical protein                                            | 0.786233   | 0.00825  | 0.021711 |
| PGN_0218 |      | transposase in ISPg1                                                      | -2.46572   | 5.00E-05 | 0.00026  |
| PGN_0219 |      | partial transposase in ISPg1                                              | -2.86189   | 5.00E-05 | 0.00026  |
| PGN_0220 |      | partial transposase in ISPg1                                              | -2.80863   | 5.00E-05 | 0.00026  |
| PGN_0221 |      | DNA topoisomerase III                                                     | -1.22845   | 0.0003   | 0.00126  |
| PGN_0222 |      | conserved hypothetical protein                                            | 0.0673572  | 0.88565  | 0.925754 |
| PGN_0223 |      | glycosyl transferase family 4                                             | 0.569133   | 0.06375  | 0.119149 |
| PGN_0224 |      | UDP-N-acetyl-D-mannosaminuronic acid dehydrogenase                        | 0.84651    | 0.00585  | 0.016091 |
| PGN_0225 |      | probable glycosyltransferase                                              | 1.29059    | 5.00E-05 | 0.00026  |
| PGN_0226 |      | conserved hypothetical protein                                            | 1.87092    | 5.00E-05 | 0.00026  |
| PGN_0227 |      | probable glycosyl transferase family 1                                    | 1.39732    | 5.00E-05 | 0.00026  |
| PGN_0228 |      | probable coenzyme F390 synthetase                                         | 1.14764    | 0.0001   | 0.000483 |
| PGN_0229 |      | putative DNA-binding protein histone-like family                          | 0.0760551  | 0.7787   | 0.84844  |
| PGN_0230 |      | probable serine acetyltransferase                                         | 0.451441   | 0.34645  | 0.464771 |
| PGN_0231 |      | probable delta-aminolevulinic acid dehydratase                            | 0.477881   | 0.16215  | 0.254742 |
| PGN_0232 |      | probable glycosyl transferase family 2                                    | 0.492466   | 0.0914   | 0.158979 |
| PGN_0233 |      | conserved hypothetical protein with glycosyl transferase WecB/TagA/CpsF f | 0.581188   | 0.0467   | 0.091974 |
| PGN_0234 |      | UDP-N-acetylglucosamine 2-epimerase                                       | 0.388517   | 0.154    | 0.244027 |
| PGN_0235 |      | DNA-binding protein HU                                                    | -0.850525  | 0.00795  | 0.021104 |
| PGN_0236 |      | conserved hypothetical protein                                            | 0.431132   | 0.12735  | 0.20808  |
| PGN_0237 |      | conserved hypothetical protein                                            | 0.0324633  | 0.9057   | 0.938771 |
| PGN_0238 |      | conserved hypothetical protein                                            | 0.697651   | 0.28405  | 0.39917  |
| PGN_0239 |      | putative type I phosphodiesterase-nucleotide pyrophosphatase              | 0.662442   | 0.0395   | 0.08032  |
| PGN_0240 |      | putative ferrochelatase                                                   | 0.298536   | 0.2765   | 0.391142 |
| PGN_0241 |      | conserved hypothetical protein                                            | 0.195698   | 0.48545  | 0.597758 |
| PGN_0242 |      | probable glycosyl transferase family 1                                    | -0.185727  | 0.49435  | 0.606612 |
| PGN_0243 | gpmA | phosphoglycerate mutase                                                   | 2.00091    | 5.00E-05 | 0.00026  |
| PGN_0244 |      | hypothetical protein                                                      | 0.701827   | 0.2102   | 0.315747 |
| PGN_0245 |      | hypothetical protein                                                      | 0.275158   | 0.5018   | 0.614691 |
| PGN_0246 |      | conserved hypothetical protein                                            | 0.0824873  | 0.8322   | 0.885647 |
| PGN_0247 |      | putative magnesium transporter                                            | -0.4324    | 0.12885  | 0.210208 |
| PGN_0248 | ksgA | putative dimethyladenosine transferase                                    | -0.234385  | 0.41545  | 0.532827 |
| PGN_0249 |      | conserved hypothetical protein                                            | -0.0528937 | 0.85165  | 0.899938 |

|          |      |                                                         |            |          |          |
|----------|------|---------------------------------------------------------|------------|----------|----------|
| PGN_0250 |      | aminoacyl-histidine dipeptidase                         | -0.127535  | 0.6545   | 0.749786 |
| PGN_0251 |      | malonyl CoA-acyl carrier protein transacylase           | -0.42096   | 0.1436   | 0.230735 |
| PGN_0252 |      | putative membrane-bound lytic murein transglycosylase D | 1.78222    | 5.00E-05 | 0.00026  |
| PGN_0253 |      | conserved hypothetical protein                          | 0.682186   | 0.0155   | 0.036748 |
| PGN_0254 |      | putative ParB chromosome partitioning protein           | 0.629285   | 0.02425  | 0.05339  |
| PGN_0255 |      | putative ParA chromosome partitioning protein           | 1.05695    | 0.00045  | 0.001764 |
| PGN_0256 |      | hydrolase                                               | -0.691375  | 0.0209   | 0.047488 |
| PGN_0257 |      | putative arginine deiminase                             | 0.0989272  | 0.73095  | 0.813058 |
| PGN_0258 | secG | hypothetical protein                                    | -0.388365  | 0.1977   | 0.300431 |
| PGN_0259 |      | conserved hypothetical protein                          | -0.12548   | 0.65     | 0.748432 |
| PGN_0260 |      | conserved hypothetical protein                          | -0.188807  | 0.79245  | 0.857878 |
| PGN_0261 |      | sigma-54-dependent transcriptional regulator            | -0.09133   | 0.77045  | 0.842469 |
| PGN_0262 |      | conserved hypothetical protein                          | -0.320826  | 0.2618   | 0.375335 |
| PGN_0263 |      | putative Fe-S oxidoreductase                            | -0.846934  | 0.04425  | 0.087963 |
| PGN_0264 |      | signal recognition particle-docking protein             | -0.938966  | 0.0273   | 0.059187 |
| PGN_0265 |      | carboxynorspermidine decarboxylase                      | -1.14143   | 0.00015  | 0.000685 |
| PGN_0266 | aspS | aspartyl-tRNA synthetase                                | -0.960774  | 0.00165  | 0.005388 |
| PGN_0267 |      | putative riboflavin biosynthesis protein                | -0.36185   | 0.2011   | 0.304511 |
| PGN_0268 |      | protoporphyrinogen oxidase                              | -0.621361  | 0.09585  | 0.164834 |
| PGN_0269 |      | putative transcriptional regulatory protein             | -0.676471  | 0.29225  | 0.408268 |
| PGN_0270 |      | probable amidophosphoribosyl-transferase                | 0.170852   | 0.81465  | 0.873136 |
| PGN_0271 |      | endopeptidase PepO                                      | 0.219669   | 0.45555  | 0.572043 |
| PGN_0272 |      | conserved hypothetical protein                          | -0.0137047 | 0.9612   | 0.972159 |
| PGN_0273 |      | conserved hypothetical protein                          | 0.382981   | 0.19615  | 0.29844  |
| PGN_0274 |      | putative RNA polymerase sigma-70 factor ECF subfamily   | 0.869147   | 0.00825  | 0.021711 |
| PGN_0275 |      | phosphofructokinase                                     | -0.483304  | 0.09405  | 0.162658 |
| PGN_0276 |      | hypothetical protein                                    | 0.449252   | 0.3655   | 0.483623 |
| PGN_0277 | hslR | putative heat shock protein 15                          | 0.707507   | 0.03675  | 0.075815 |
| PGN_0278 |      | putative peptidyl-tRNA hydrolase                        | 1.48677    | 5.00E-05 | 0.00026  |
| PGN_0279 | rplY | putative 50S ribosomal protein L25                      | 2.07858    | 5.00E-05 | 0.00026  |
| PGN_0280 |      | hypothetical protein                                    | -1.58604   | 0.00615  | 0.016873 |
| PGN_0281 | metG | methionyl-tRNA synthetase                               | 0.0752886  | 0.79085  | 0.857291 |
| PGN_0282 |      | 2',3'-cyclic-nucleotide 2'-phosphodiesterase precursor  | 0.00914116 | 0.98085  | 0.986195 |
| PGN_0283 |      | probable exonuclease                                    | 0.0992377  | 0.8352   | 0.886411 |
| PGN_0284 |      | probable transcriptional regulator                      | -0.407408  | 0.14685  | 0.23507  |
| PGN_0285 |      | pyridine nucleotide-disulphide oxidoreductase           | 0.0686918  | 0.80095  | 0.863404 |
| PGN_0286 |      | hypothetical protein frame-shifted with PGN0285         | 0.656853   | 0.39325  | 0.510817 |
| PGN_0287 | mfa1 | Mfa1fimbriin                                            | 0.157022   | 0.63905  | 0.738219 |
| PGN_0288 | mfa2 | conserved hypothetical protein                          | 0.847863   | 0.0037   | 0.010971 |
| PGN_0289 | mfa3 | conserved hypothetical protein                          | 1.34748    | 5.00E-05 | 0.00026  |
| PGN_0290 | mfa4 | immunoreactive 32 kDa antigen                           | 1.29728    | 5.00E-05 | 0.00026  |
| PGN_0291 | mfa5 | conserved hypothetical protein                          | 1.43414    | 5.00E-05 | 0.00026  |
| PGN_0292 |      | hypothetical protein                                    | -0.534509  | 0.4123   | 0.529425 |
| PGN_0293 | ragA | receptor antigen A                                      | 0.263097   | 0.4761   | 0.589498 |
| PGN_0294 | ragB | receptor antigen B                                      | 0.0915214  | 0.7868   | 0.854641 |
| PGN_0295 |      | C-terminal domain of Arg- and Lys-gingipain proteinase  | -1.24493   | 0.0021   | 0.006663 |
| PGN_0296 |      | conserved hypothetical protein                          | 0.15662    | 0.58925  | 0.692336 |
| PGN_0297 |      | conserved hypothetical protein                          | 0.256639   | 0.36965  | 0.487297 |
| PGN_0298 |      | putative undecaprenyl diphosphate synthase              | 0.820753   | 0.00565  | 0.015683 |
| PGN_0299 |      | putative outer membrane protein                         | 1.09977    | 0.0005   | 0.001921 |
| PGN_0300 |      | conserved hypothetical protein                          | 0.00840409 | 0.9769   | 0.984297 |
| PGN_0301 |      | conserved hypothetical protein                          | 0.927541   | 0.00255  | 0.007891 |
| PGN_0302 |      | rubrerythrin                                            | -2.4839    | 5.00E-05 | 0.00026  |
| PGN_0303 |      | putative zinc protease                                  | 0.186445   | 0.5331   | 0.64597  |
| PGN_0304 |      | conserved hypothetical protein                          | -0.201898  | 0.7948   | 0.858132 |
| PGN_0305 |      | conserved hypothetical protein                          | 0.156188   | 0.8302   | 0.885076 |
| PGN_0306 |      | conserved hypothetical protein                          | 0.531022   | 0.26105  | 0.374764 |
| PGN_0307 |      | conserved hypothetical protein                          | 0.681124   | 0.0797   | 0.14235  |
| PGN_0308 |      | conserved hypothetical protein                          | 1.47751    | 0.17575  | 0.27272  |
| PGN_0309 | rnpA | probable ribonuclease P protein component               | 1.56231    | 0.05135  | 0.099386 |
| PGN_0310 |      | putative uroporphyrinogen-III synthase                  | 1.37449    | 0.0001   | 0.000483 |
| PGN_0311 |      | conserved hypothetical protein                          | 1.61706    | 0.15225  | 0.242076 |

|          |      |                                                                       |            |          |          |
|----------|------|-----------------------------------------------------------------------|------------|----------|----------|
| PGN_0312 |      | hypothetical protein                                                  | 1.16139    | 0.00055  | 0.002076 |
| PGN_0313 |      | peptide chain release factor 3                                        | 1.57079    | 5.00E-05 | 0.00026  |
| PGN_0314 |      | probable formate/nitrite transporter                                  | 0.456819   | 0.1007   | 0.171735 |
| PGN_0315 |      | precorrin-6x reductase/cobalamin biosynthetic protein CbiD            | 0.307805   | 0.46815  | 0.5815   |
| PGN_0316 |      | precorrin-4 C11-methyltransferase                                     | 0.251518   | 0.53835  | 0.650112 |
| PGN_0317 |      | decarboxylating precorrin-6Y C5,15-methyltransferase                  | 0.271101   | 0.62315  | 0.724965 |
| PGN_0318 |      | precorrin-3B C17-methyltransferase                                    | -0.288112  | 0.4057   | 0.52221  |
| PGN_0319 |      | probable RNA polymerase sigma-70 factor ECF subfamily                 | 0.306296   | 0.3695   | 0.487297 |
| PGN_0320 |      | conserved hypothetical protein                                        | -0.0573941 | 0.9019   | 0.937341 |
| PGN_0321 |      | conserved hypothetical protein                                        | 0.0054463  | 0.9846   | 0.988314 |
| PGN_0322 |      | conserved hypothetical protein                                        | -0.0608739 | 0.82795  | 0.883562 |
| PGN_0323 |      | conserved hypothetical protein                                        | 0.390374   | 0.1658   | 0.258599 |
| PGN_0324 |      | transposase in ISPg1                                                  | -2.35151   | 5.00E-05 | 0.00026  |
| PGN_0325 |      | hypothetical protein                                                  | -1.07474   | 0.0112   | 0.02802  |
| PGN_0326 |      | DNA-binding protein histone-like family                               | -1.3148    | 0.00125  | 0.004224 |
| PGN_0327 |      | putative DNA polymerase III epsilon chain                             | -0.160772  | 0.5837   | 0.688475 |
| PGN_0328 |      | conserved hypothetical protein                                        | -0.127499  | 0.65395  | 0.749786 |
| PGN_0329 |      | conserved hypothetical protein                                        | 0.311925   | 0.2907   | 0.407044 |
| PGN_0330 |      | DNA repair protein                                                    | 0.111729   | 0.69915  | 0.790069 |
| PGN_0331 |      | conserved hypothetical protein                                        | -0.226601  | 0.4332   | 0.549632 |
| PGN_0332 |      | conserved hypothetical protein                                        | -0.18535   | 0.6536   | 0.749786 |
| PGN_0333 |      | putative transaldolase                                                | 0.124512   | 0.73835  | 0.817445 |
| PGN_0334 |      | conserved hypothetical protein with DUF1343 domain                    | -0.538915  | 0.3244   | 0.443007 |
| PGN_0335 |      | conserved hypothetical protein with Zinc carboxypeptidase domain      | 0.500973   | 0.1017   | 0.172939 |
| PGN_0336 |      | immunoreactive 23 kDa antigen                                         | 1.64842    | 5.00E-05 | 0.00026  |
| PGN_0337 |      | conserved hypothetical protein                                        | 1.16224    | 0.3222   | 0.441134 |
| PGN_0338 |      | hypothetical protein                                                  | -0.315382  | 1        | 1        |
| PGN_0339 |      | hypothetical protein                                                  | 0.43697    | 0.65425  | 0.749786 |
| PGN_0340 |      | carboxyl-terminal processing protease                                 | 1.63635    | 5.00E-05 | 0.00026  |
| PGN_0341 |      | conserved hypothetical protein                                        | 0.580947   | 0.04655  | 0.091764 |
| PGN_0342 |      | putative uracil-DNA glycosylase                                       | 1.05462    | 0.00045  | 0.001764 |
| PGN_0343 |      | hypothetical protein                                                  | 1.64412    | 0.00295  | 0.008947 |
| PGN_0344 |      | probable haloacid dehalogenase-like hydrolase                         | 2.43639    | 5.00E-05 | 0.00026  |
| PGN_0345 |      | conserved hypothetical protein                                        | 0.470335   | 0.1476   | 0.235916 |
| PGN_0346 |      | putative methyltransferase                                            | -0.0311522 | 0.91845  | 0.946915 |
| PGN_0347 |      | conserved hypothetical protein                                        | 0.10106    | 0.73325  | 0.813915 |
| PGN_0348 | uspA | putative universal stress protein UspA                                | -2.7189    | 5.00E-05 | 0.00026  |
| PGN_0349 | ustA | upregulated in stationary phase protein A                             | -2.67263   | 5.00E-05 | 0.00026  |
| PGN_0350 |      | probable translation initiation factor SUI1                           | -0.904605  | 0.00395  | 0.011552 |
| PGN_0351 |      | pyruvate carboxylase subunit B                                        | -0.683335  | 0.0331   | 0.069772 |
| PGN_0352 |      | conserved hypothetical protein                                        | -1.52287   | 0.00175  | 0.005688 |
| PGN_0353 |      | conserved hypothetical protein                                        | 0.271293   | 0.363    | 0.481345 |
| PGN_0354 | nusA | putative nitrogen utilization substance protein A                     | 0.30706    | 0.317    | 0.435696 |
| PGN_0355 | infB | translation initiation factor IF-2                                    | 0.184853   | 0.54525  | 0.656211 |
| PGN_0356 |      | conserved hypothetical protein                                        | 0.584567   | 0.04625  | 0.091342 |
| PGN_0357 |      | ABC transporter membrane protein                                      | -0.516701  | 0.0947   | 0.163517 |
| PGN_0358 |      | putative ABC transporter ATP-binding protein                          | -0.328143  | 0.27325  | 0.387716 |
| PGN_0359 |      | putative ABC transporter permease protein                             | -0.246514  | 0.42665  | 0.543589 |
| PGN_0360 |      | tyrosyl-tRNA synthetase                                               | 0.293509   | 0.3244   | 0.443007 |
| PGN_0361 |      | putative glycosyl transferase family 2                                | 0.927308   | 0.00145  | 0.004794 |
| PGN_0362 |      | hypothetical protein                                                  | 0.150476   | 0.8817   | 0.922427 |
| PGN_0363 |      | conserved hypothetical protein                                        | 1.09123    | 0.23705  | 0.346383 |
| PGN_0364 |      | arginyl-tRNA synthetase                                               | -1.47865   | 5.00E-05 | 0.00026  |
| PGN_0364 | argS | hypothetical protein                                                  | -0.754568  | 0.1819   | 0.280018 |
| PGN_0366 | mnmA | putative tRNA 5-methylaminomethyl-2-thiouridylate 5-methyltransferase | -1.06052   | 0.00055  | 0.002076 |
| PGN_0367 |      | exodeoxyribonuclease III                                              | -0.337174  | 0.2191   | 0.325289 |
| PGN_0368 | oxyR | redox-sensitive transcriptional activator OxyR                        | -0.161541  | 0.55335  | 0.663335 |
| PGN_0369 |      | probable single-stranded binding protein                              | 0.559175   | 0.04325  | 0.086541 |
| PGN_0370 |      | conserved hypothetical protein                                        | 1.01801    | 0.0005   | 0.001921 |
| PGN_0371 |      | conserved hypothetical protein                                        | 0.212181   | 0.47295  | 0.586095 |
| PGN_0372 |      | hypothetical protein                                                  | -0.276108  | 0.46205  | 0.576953 |
| PGN_0373 |      | putative thioredoxin                                                  | -1.33874   | 0.0009   | 0.003178 |

|          |      |                                                                            |             |          |          |
|----------|------|----------------------------------------------------------------------------|-------------|----------|----------|
| PGN_0374 |      | conserved hypothetical protein                                             | -0.666384   | 0.0289   | 0.062339 |
| PGN_0375 |      | phosphoribulose/uridine kinase                                             | -1.47002    | 5.00E-05 | 0.00026  |
| PGN_0376 |      | 2-dehydro-3-deoxyphosphooctonate aldolase                                  | -0.447761   | 0.1063   | 0.179471 |
| PGN_0377 | aspA | aspartate ammonia-lyase                                                    | -0.0236181  | 0.9381   | 0.956979 |
| PGN_0378 |      | putative exopolyphosphatase                                                | 0.354602    | 0.204    | 0.307807 |
| PGN_0379 |      | conserved hypothetical protein                                             | 0.818251    | 0.0055   | 0.015307 |
| PGN_0380 |      | partial ROK family transcriptional repressor with glucose kinase domain    | -0.225859   | 0.5505   | 0.661035 |
| PGN_0381 |      | partial ROK family transcriptional repressor with glucose kinase domain    | -0.533366   | 0.38155  | 0.499582 |
| PGN_0382 |      | conserved hypothetical protein                                             | -0.354212   | 0.7494   | 0.82667  |
| PGN_0383 |      | probable transporter                                                       | 1.50535     | 0.42945  | 0.545524 |
| PGN_0384 |      | conserved hypothetical protein                                             | 0.755683    | 0.6605   | 0.753997 |
| PGN_0385 |      | putative integrase/recombinase XerD                                        | -0.622939   | 0.0221   | 0.049684 |
| PGN_0386 |      | probable 3-dehydroquininate dehydratase type II                            | -0.722497   | 0.00965  | 0.024753 |
| PGN_0387 |      | putative O-methyltransferase                                               | -0.340555   | 0.22295  | 0.330084 |
| PGN_0388 |      | putative thiol peroxidase                                                  | -2.2156     | 5.00E-05 | 0.00026  |
| PGN_0389 |      | putative cytidine/deoxycytidylate deaminase                                | 0.542833    | 0.0606   | 0.114479 |
| PGN_0390 |      | conserved hypothetical protein                                             | 1.16693     | 0.0001   | 0.000483 |
| PGN_0391 |      | conserved hypothetical protein                                             | 0.449945    | 0.12345  | 0.202797 |
| PGN_0392 |      | conserved hypothetical protein with competence-damaged protein domain      | 0.836131    | 0.22725  | 0.334357 |
| PGN_0393 |      | putative O-sialoglycoprotein endopeptidase                                 | 0.382204    | 0.21555  | 0.321212 |
| PGN_0394 | rpsT | probable 30S ribosomal protein S20                                         | 1.37038     | 5.00E-05 | 0.00026  |
| PGN_0395 |      | conserved hypothetical protein                                             | 0.73698     | 0.0351   | 0.072834 |
| PGN_0396 |      | ribonuclease R                                                             | 0.0593897   | 0.8335   | 0.886198 |
| PGN_0397 |      | putative auxin-regulated protein                                           | 0.263886    | 0.3476   | 0.46602  |
| PGN_0398 |      | ABC transporter ATP-binding protein MsbA family                            | 0.123164    | 0.6679   | 0.760512 |
| PGN_0399 |      | conserved hypothetical protein                                             | 1.62296     | 0.0299   | 0.064235 |
| PGN_0400 |      | conserved hypothetical protein                                             | 0.683094    | 0.0332   | 0.069914 |
| PGN_0401 |      | conserved hypothetical protein                                             | -0.638118   | 0.23905  | 0.348826 |
| PGN_0402 |      | hypothetical protein                                                       | -1.42942    | 0.04755  | 0.093303 |
| PGN_0403 |      | putative pyridoxamine-phosphate oxidase                                    | -0.00797731 | 0.9767   | 0.984297 |
| PGN_0404 |      | conserved hypothetical protein                                             | 0.267942    | 0.33545  | 0.454309 |
| PGN_0405 |      | alpha-1,2-mannosidase family protein                                       | 0.762174    | 0.00905  | 0.023355 |
| PGN_0406 |      | conserved hypothetical protein with glycosyl hydrolase family 92 domain    | 0.953781    | 0.0008   | 0.002848 |
| PGN_0407 |      | hypothetical protein                                                       | 0.733273    | 0.0769   | 0.13816  |
| PGN_0408 |      | conserved hypothetical protein                                             | 1.03386     | 0.0006   | 0.002241 |
| PGN_0409 |      | conserved hypothetical protein                                             | 0.721051    | 0.01145  | 0.028578 |
| PGN_0410 |      | probable RNA pseudouridylate synthase                                      | 0.936953    | 0.00145  | 0.004794 |
| PGN_0411 |      | thiol-disulfide interchange protein                                        | 1.42424     | 5.00E-05 | 0.00026  |
| PGN_0412 | mazG | conserved hypothetical protein                                             | 0.952143    | 0.00135  | 0.004519 |
| PGN_0413 | gyrB | DNA gyrase B subunit                                                       | 0.0560514   | 0.87475  | 0.916959 |
| PGN_0414 |      | probable membrane-bound dipeptidase                                        | -0.499041   | 0.45     | 0.566558 |
| PGN_0415 |      | restriction endonuclease                                                   | -0.909493   | 0.00225  | 0.007076 |
| PGN_0416 |      | putative type II DNA modification methyltransferase                        | -1.32564    | 5.00E-05 | 0.00026  |
| PGN_0417 |      | conserved hypothetical protein                                             | -0.627544   | 0.05305  | 0.101751 |
| PGN_0418 |      | conserved hypothetical protein with aminodeoxychorismate lyase domain      | -0.706828   | 0.0878   | 0.153975 |
| PGN_0419 |      | putative dinucleotide-utilizing enzyme involved in molybdopterin and thiam | -0.674699   | 0.2155   | 0.321212 |
| PGN_0420 |      | putative lipoprotein releasing system ATP-binding protein                  | -0.184441   | 0.79695  | 0.859963 |
| PGN_0421 |      | conserved hypothetical protein                                             | -0.698225   | 0.0161   | 0.038001 |
| PGN_0422 |      | conserved hypothetical protein                                             | 0.417915    | 0.13965  | 0.225239 |
| PGN_0423 |      | putative transcription elongation factor                                   | 2.06013     | 5.00E-05 | 0.00026  |
| PGN_0424 |      | putative HIT family protein                                                | 2.11132     | 5.00E-05 | 0.00026  |
| PGN_0425 |      | partial transposase in ISPg3                                               | -0.351242   | 0.3281   | 0.447772 |
| PGN_0426 |      | conserved hypothetical protein                                             | -1.59191    | 0.0755   | 0.136567 |
| PGN_0427 |      | putative glycosyl hydrolase                                                | -1.60105    | 0.1581   | 0.249514 |
| PGN_0428 |      | putative glycosyl transferase family 1                                     | -1.5652     | 0.17825  | 0.275795 |
| PGN_0429 |      | putative 4-alpha-glucanotransferase                                        | -2.002      | 0.0036   | 0.010705 |
| PGN_0430 |      | putative ATP-binding component of ABC transporter protein                  | 0.765233    | 0.03445  | 0.071695 |
| PGN_0431 |      | conserved hypothetical protein                                             | 0.146412    | 0.65325  | 0.749786 |
| PGN_0432 |      | conserved hypothetical protein                                             | -0.161294   | 0.8605   | 0.906535 |
| PGN_0433 | pgk  | phosphoglycerate kinase                                                    | 0.506911    | 0.07185  | 0.130742 |
| PGN_0434 |      | phosphoenolpyruvate carboxykinase                                          | 0.0368356   | 0.90245  | 0.937341 |
| PGN_0435 |      | probable partial hemagglutinin-related protein                             | -1.68964    | 0.0935   | 0.16197  |



|          |                                                       |            |          |          |
|----------|-------------------------------------------------------|------------|----------|----------|
| PGN_0436 | probable partial hemagglutinin-related protein        | -1.10433   | 0.0758   | 0.136851 |
| PGN_0437 | conserved hypothetical protein                        | 0.855197   | 0.33255  | 0.451818 |
| PGN_0438 | conserved hypothetical protein                        | 0.540998   | 0.42125  | 0.53832  |
| PGN_0439 | conserved hypothetical protein                        | -1.34513   | 5.00E-05 | 0.00026  |
| PGN_0440 | conserved hypothetical protein                        | 0.731778   | 0.01515  | 0.036038 |
| PGN_0441 | hypothetical protein                                  | -0.575521  | 0.5802   | 0.685106 |
| PGN_0442 | transposase in ISPg3                                  | -0.400286  | 0.17645  | 0.273408 |
| PGN_0443 | hypothetical protein                                  | 1.01761    | 0.04985  | 0.096923 |
| PGN_0444 | probable outer membrane efflux protein                | 0.128321   | 0.72325  | 0.807446 |
| PGN_0445 | membrane fusion efflux protein                        | -0.0982218 | 0.83135  | 0.885647 |
| PGN_0446 | putative ABC transporter ATP-binding protein          | -0.0368573 | 0.89515  | 0.932831 |
| PGN_0447 | putative ABC transporter permease protein             | -0.20928   | 0.45855  | 0.573255 |
| PGN_0448 | putative ABC transporter ATP-binding protein          | -0.030326  | 0.91645  | 0.946228 |
| PGN_0449 | conserved hypothetical protein                        | 0.0498106  | 0.8657   | 0.90963  |
| PGN_0450 | putative RNA polymerase sigma-70 factor ECF subfamily | -1.24973   | 0.00125  | 0.004224 |
| PGN_0451 | conserved hypothetical protein                        | -0.461733  | 0.3505   | 0.469022 |
| PGN_0453 | partial transposase Orf1 in ISPg5                     | -0.340241  | 0.39325  | 0.510817 |
| PGN_0454 | transposase in ISPg3                                  | -0.293091  | 0.31915  | 0.438085 |
| PGN_0455 | partial transposase Orf1 in ISPg5                     | -0.441753  | 0.2327   | 0.341197 |
| PGN_0456 | methylmalonyl-CoA mutase large subunit                | -1.14472   | 0.0003   | 0.00126  |
| PGN_0457 | methylmalonyl-CoA mutase small subunit                | -1.14193   | 0.0003   | 0.00126  |
| PGN_0458 | hypothetical protein                                  | 0.0334129  | 0.9066   | 0.93879  |
| PGN_0459 | transposase in ISPg3                                  | -0.278155  | 0.33915  | 0.458736 |
| PGN_0460 | DNA-binding protein histone-like family               | -1.41381   | 0.00065  | 0.00239  |
| PGN_0461 | probable D-alanyl-D-alanine dipeptidase               | 0.079371   | 0.77425  | 0.844889 |
| PGN_0462 | probable haloacid dehalogenase-like hydrolase         | -0.963814  | 0.0013   | 0.004379 |
| PGN_0463 | conserved hypothetical protein                        | -0.661541  | 0.02345  | 0.051951 |
| PGN_0464 | conserved hypothetical protein                        | -0.983133  | 0.00215  | 0.006791 |
| PGN_0465 | GTP pyrophosphokinase                                 | -1.29426   | 5.00E-05 | 0.00026  |
| PGN_0466 | putative cardiolipin synthetase                       | -1.05015   | 0.0002   | 0.000895 |
| PGN_0467 | conserved hypothetical protein                        | -1.13305   | 0.6519   | 0.749786 |
| PGN_0468 | conserved hypothetical protein with DUF452 domain     | 1.76236    | 0.00055  | 0.002076 |
| PGN_0469 | probable biotin synthesis protein                     | 0.981604   | 0.0266   | 0.057787 |
| PGN_0470 | conserved hypothetical protein                        | -0.200728  | 0.82085  | 0.877304 |
| PGN_0471 | conserved hypothetical protein                        | 0.0144998  | 0.99015  | 0.991547 |
| PGN_0472 | DNA topoisomerase IV A subunit                        | -1.09496   | 0.0021   | 0.006663 |
| PGN_0473 | conserved hypothetical protein                        | -1.07531   | 0.0005   | 0.001921 |
| PGN_0474 | hypothetical protein                                  | -0.861655  | 0.3984   | 0.514993 |
| PGN_0475 | hypothetical protein                                  | 0.224765   | 0.65505  | 0.749786 |
| PGN_0476 | conserved hypothetical protein                        | -0.657473  | 0.0396   | 0.080447 |
| PGN_0477 | conserved hypothetical protein                        | -0.626545  | 0.0515   | 0.099495 |
| PGN_0478 | partial transposase in ISPg4                          | 2.18427    | 5.00E-05 | 0.00026  |
| PGN_0479 | hypothetical protein                                  | 0.543967   | 0.34035  | 0.459394 |
| PGN_0480 | partial transposase in ISPg4                          | 0.382082   | 0.3365   | 0.455441 |
| PGN_0481 | hypothetical protein                                  | 1.47091    | 5.00E-05 | 0.00026  |
| PGN_0482 | probable immunoreactive 23 kDa antigen                | 1.72469    | 5.00E-05 | 0.00026  |
| PGN_0483 | putative aldose 1-epimerase                           | 0.0327616  | 0.903    | 0.937341 |
| PGN_0484 | putative galactokinase                                | 0.506835   | 0.0767   | 0.138034 |
| PGN_0485 | conserved hypothetical protein                        | 1.12045    | 0.00025  | 0.00108  |
| PGN_0486 | conserved hypothetical protein                        | 0.503859   | 0.0694   | 0.127593 |
| PGN_0487 | FtsK/SpoIIIE family cell division protein             | 0.628255   | 0.03275  | 0.06924  |
| PGN_0488 | conserved hypothetical protein                        | 1.07413    | 0.00045  | 0.001764 |
| PGN_0489 | conserved hypothetical protein                        | 0.767007   | 0.5345   | 0.64693  |
| PGN_0490 | putative DNA-damage-inducible protein F               | -0.315472  | 0.304    | 0.420612 |
| PGN_0491 | probable phosphotyrosine protein phosphatase          | -0.829598  | 0.0085   | 0.022204 |
| PGN_0492 | cation-transporting ATPase                            | -1.18037   | 0.00315  | 0.009459 |
| PGN_0493 | hypothetical protein                                  | -2.01802   | 5.00E-05 | 0.00026  |
| PGN_0494 | hypothetical protein                                  | 1.27228    | 1        | 1        |
| PGN_0495 | conserved hypothetical protein                        | -1.09132   | 0.0005   | 0.001921 |
| PGN_0496 | putative cytochrome B subunit                         | -0.894611  | 0.00385  | 0.011337 |
| PGN_0497 | sdhA fumarate reductase flavoprotein subunit          | -0.793443  | 0.0125   | 0.030589 |
| PGN_0498 | fumarate reductase iron-sulfur protein                | -0.773807  | 0.01525  | 0.036236 |

|          |      |                                                      |                 |          |          |
|----------|------|------------------------------------------------------|-----------------|----------|----------|
| PGN_0499 |      | conserved hypothetical protein                       | -0.590048       | 0.04425  | 0.087963 |
| PGN_0500 |      | methylmalonyl-CoA decarboxylase alpha subunit        | 0.141871        | 0.64435  | 0.743534 |
| PGN_0501 |      | conserved hypothetical protein                       | 0.0770825       | 0.81045  | 0.870496 |
| PGN_0502 |      | conserved hypothetical protein                       | 0.0290094       | 0.9746   | 0.983376 |
| PGN_0503 |      | putative biotin carboxyl carrier protein             | 0.235465        | 0.41985  | 0.536917 |
| PGN_0504 |      | methylmalonyl-CoA decarboxylase beta subunit         | 0.1402          | 0.64185  | 0.741051 |
| PGN_0505 |      | hypothetical protein                                 | -0.322752       | 0.84115  | 0.890949 |
| PGN_0506 |      | hypothetical protein                                 | 0.671559        | 0.12985  | 0.211515 |
| PGN_0507 |      | putative ion transporter                             | -0.0307933      | 0.92085  | 0.94893  |
| PGN_0508 |      | putative aminopeptidase                              | <b>2.44013</b>  | 5.00E-05 | 0.00026  |
| PGN_0509 |      | immunoreactive 84 kDa antigen                        | 0.778044        | 0.01075  | 0.027021 |
| PGN_0510 |      | probable xanthosine triphosphate pyrophosphatase     | 0.680962        | 0.02185  | 0.049174 |
| PGN_0511 |      | conserved hypothetical protein                       | -0.306465       | 0.4038   | 0.520272 |
| PGN_0512 |      | probable biotin--acetyl-CoA-carboxylase ligase       | 0.757443        | 0.1197   | 0.198023 |
| PGN_0513 |      | conserved hypothetical protein                       | <b>1.96326</b>  | 5.00E-05 | 0.00026  |
| PGN_0514 |      | conserved hypothetical protein                       | <b>1.60446</b>  | 0.0007   | 0.002543 |
| PGN_0515 |      | probable lipoprotein signal peptidase                | <b>1.6067</b>   | 5.00E-05 | 0.00026  |
| PGN_0516 |      | putative DnaK suppressor protein                     | 0.659279        | 0.0216   | 0.048663 |
| PGN_0517 | ileS | isoleucyl-tRNA synthetase                            | <b>1.20056</b>  | 0.0001   | 0.000483 |
| PGN_0518 |      | putative ribulose-phosphate 3-epimerase              | -0.728646       | 0.01505  | 0.035881 |
| PGN_0519 |      | probable competence protein                          | 1.1915          | 0.00705  | 0.018951 |
| PGN_0520 |      | probable shikimate kinase                            | 0.620613        | 0.1602   | 0.252454 |
| PGN_0521 |      | conserved hypothetical protein                       | 0.698614        | 0.0212   | 0.048067 |
| PGN_0522 |      | putative dihydropteroate synthase                    | 0.460874        | 0.10105  | 0.172108 |
| PGN_0523 |      | conserved hypothetical protein                       | <b>0.878498</b> | 0.00305  | 0.009172 |
| PGN_0524 |      | lipid A 4'-phosphatase                               | <b>1.63893</b>  | 5.00E-05 | 0.00026  |
| PGN_0525 | batE | probable aerotolerance-related exported protein BatE | <b>1.69542</b>  | 0.00095  | 0.003316 |
| PGN_0526 | batD | aerotolerance-related exported protein BatD          | <b>2.01967</b>  | 5.00E-05 | 0.00026  |
| PGN_0527 | batC | probable aerotolerance-related exported protein BatC | 1.92968         | 0.0037   | 0.010971 |
| PGN_0528 | batB | putative aerotolerance-related exported protein BatB | <b>1.49842</b>  | 5.00E-05 | 0.00026  |
| PGN_0529 | batA | aerotolerance-related membrane protein BatA          | 1.11344         | 0.03925  | 0.079965 |
| PGN_0530 |      | conserved hypothetical protein                       | 1.06581         | 0.0854   | 0.150635 |
| PGN_0531 |      | putative von Willebrand factor type A                | 0.503518        | 0.2863   | 0.401537 |
| PGN_0532 |      | magnesium chelatase subunit I                        | 0.493024        | 0.09215  | 0.159892 |
| PGN_0533 |      | putative quinolinate synthetase complex subunit A    | <b>1.77522</b>  | 5.00E-05 | 0.00026  |
| PGN_0534 |      | putative nicotinate-nucleotide pyrophosphorylase     | <b>1.48703</b>  | 5.00E-05 | 0.00026  |
| PGN_0535 |      | L-aspartate oxidase                                  | <b>0.954195</b> | 0.0011   | 0.003753 |
| PGN_0536 |      | conserved hypothetical protein                       | 0.542366        | 0.38515  | 0.503367 |
| PGN_0537 |      | probable transcriptional regulator Crp family        | <b>-1.44267</b> | 5.00E-05 | 0.00026  |
| PGN_0538 |      | conserved hypothetical protein                       | -0.333958       | 0.3189   | 0.438025 |
| PGN_0539 |      | metallo-beta-lactamase superfamily protein           | 0.173737        | 0.64475  | 0.743536 |
| PGN_0540 |      | conserved hypothetical protein                       | -0.251567       | 0.67665  | 0.768314 |
| PGN_0541 |      | hypothetical protein                                 | 0.108595        | 0.94525  | 0.960233 |
| PGN_0542 |      | partial transposase in ISPg2                         | 0.403033        | 0.2749   | 0.389137 |
| PGN_0543 | gltX | glutamyl-tRNA synthetase                             | 0.446201        | 0.1118   | 0.186977 |
| PGN_0544 |      | 3-deoxy-D-manno-octulosonic-acid transferase         | <b>0.999265</b> | 0.0005   | 0.001921 |
| PGN_0545 |      | putative sulfatase                                   | <b>1.94074</b>  | 5.00E-05 | 0.00026  |
| PGN_0546 |      | glucose-1-phosphate thymidyltransferase              | 0.405194        | 0.1672   | 0.260592 |
| PGN_0547 |      | dTDP-4-dehydrorhamnose 3,5-epimerase                 | <b>1.56331</b>  | 0.00015  | 0.000685 |
| PGN_0548 |      | putative dTDP-4-dehydrorhamnose reductase            | <b>1.75945</b>  | 0.00035  | 0.001436 |
| PGN_0549 |      | dTDP-glucose 4,6-dehydratase                         | <b>2.06162</b>  | 5.00E-05 | 0.00026  |
| PGN_0550 | gcvT | aminomethyltransferase                               | <b>1.04942</b>  | 0.0007   | 0.002543 |
| PGN_0551 |      | conserved hypothetical protein                       | 0.94185         | 0.5195   | 0.633457 |
| PGN_0552 |      | hypothetical protein                                 | 2.94524         | 0.20185  | 0.305212 |
| PGN_0553 | hmuV | conserved hypothetical protein                       | <b>3.38663</b>  | 5.00E-05 | 0.00026  |
| PGN_0554 | hmuU | conserved hypothetical protein                       | <b>3.76953</b>  | 5.00E-05 | 0.00026  |
| PGN_0555 | hmuT | conserved hypothetical protein                       | 3.60573         | 0.1174   | 0.194965 |
| PGN_0556 | hmuS | putative cobalamin biosynthesis-related protein      | <b>1.98106</b>  | 5.00E-05 | 0.00026  |
| PGN_0557 | hmuR | TonB-dependent receptor HmuR                         | <b>3.24018</b>  | 5.00E-05 | 0.00026  |
| PGN_0558 | hmuY | conserved hypothetical protein                       | <b>4.7244</b>   | 5.00E-05 | 0.00026  |
| PGN_0559 |      | conserved hypothetical protein                       | -0.0437987      | 0.92275  | 0.949509 |
| PGN_0560 |      | hypothetical protein                                 | -0.794423       | 0.7602   | 0.835122 |

|          |        |                                                                    |            |          |          |
|----------|--------|--------------------------------------------------------------------|------------|----------|----------|
| PGN_0561 | prtT   | trypsin like proteinase PrtT                                       | 1.46929    | 5.00E-05 | 0.00026  |
| PGN_0562 |        | conserved hypothetical protein                                     | -2.62179   | 5.00E-05 | 0.00026  |
| PGN_0563 |        | conserved hypothetical protein                                     | -2.06691   | 0.00045  | 0.001764 |
| PGN_0564 | sod    | superoxide dismutase Fe-Mn                                         | -1.53121   | 0.00105  | 0.003606 |
| PGN_0565 |        | conserved hypothetical protein                                     | -0.0295915 | 0.92525  | 0.951622 |
| PGN_0566 |        | probable thioesterase protein                                      | 0.333737   | 0.28655  | 0.401623 |
| PGN_0567 | prtC   | collagenase                                                        | -0.305406  | 0.3308   | 0.450015 |
| PGN_0568 |        | 2-amino-4-hydroxy-6- hydroxymethylhydropteridine pyrophosphokinase | -0.94481   | 0.00295  | 0.008947 |
| PGN_0569 | queA   | S-adenosylmethionine:tRNA ribosyltransferase-isomerase             | -1.28462   | 0.00055  | 0.002076 |
| PGN_0570 |        | putative tRNA pseudouridine synthase B                             | 0.181161   | 0.514    | 0.627829 |
| PGN_0571 |        | putative undecaprenol kinase                                       | 1.30799    | 5.00E-05 | 0.00026  |
| PGN_0572 |        | conserved hypothetical protein                                     | -0.242848  | 0.38645  | 0.504446 |
| PGN_0573 |        | putative cell division protein FtsX                                | 0.338625   | 0.2461   | 0.356912 |
| PGN_0574 |        | conserved hypothetical protein                                     | -1.72591   | 0.00105  | 0.003606 |
| PGN_0575 |        | transposase in ISPg1                                               | -2.4107    | 5.00E-05 | 0.00026  |
| PGN_0576 |        | hypothetical protein                                               | #NAME?     | 1        | 1        |
| PGN_0577 |        | transposase in ISPg1                                               | -2.36923   | 5.00E-05 | 0.00026  |
| PGN_0578 |        | conserved hypothetical protein found in conjugate transposon       | -1.68786   | 0.0005   | 0.001921 |
| PGN_0579 |        | conserved hypothetical protein                                     | -0.496428  | 0.16835  | 0.262001 |
| PGN_0580 |        | conserved hypothetical protein                                     | -2.11134   | 5.00E-05 | 0.00026  |
| PGN_0581 |        | conserved hypothetical protein                                     | -0.290534  | 0.4403   | 0.557375 |
| PGN_0582 |        | DNA topoisomerase I                                                | -0.802444  | 0.01355  | 0.032633 |
| PGN_0583 |        | conserved hypothetical protein                                     | -1.24235   | 0.00015  | 0.000685 |
| PGN_0584 |        | conserved hypothetical protein                                     | 1.40228    | 5.00E-05 | 0.00026  |
| PGN_0585 |        | transposase in ISPg3                                               | -0.371724  | 0.2005   | 0.304035 |
| PGN_0586 |        | conserved hypothetical protein                                     | -0.170119  | 0.7624   | 0.836675 |
| PGN_0587 |        | transposase in ISPg1                                               | -2.39681   | 5.00E-05 | 0.00026  |
| PGN_0588 |        | conserved hypothetical protein                                     | -1.40551   | 0.0003   | 0.00126  |
| PGN_0589 |        | conserved hypothetical protein                                     | -1.8301    | 0.00065  | 0.00239  |
| PGN_0590 |        | putative Fic family protein                                        | -1.02745   | 0.00195  | 0.006262 |
| PGN_0591 |        | conserved hypothetical protein                                     | -0.815518  | 0.00445  | 0.012838 |
| PGN_0592 | traQ_1 | putative conserved protein found in conjugate transposon TraQ      | -1.76921   | 0.0001   | 0.000483 |
| PGN_0593 | traO_1 | putative conserved protein found in conjugate transposon TraO      | -1.63411   | 0.0007   | 0.002543 |
| PGN_0596 |        | conserved hypothetical protein found in conjugate transposon       | -0.252226  | 0.8108   | 0.870496 |
| PGN_0600 |        | conserved hypothetical protein                                     | -0.477041  | 0.3558   | 0.474326 |
| PGN_0601 |        | conserved hypothetical protein                                     | -2.11668   | 0.00015  | 0.000685 |
| PGN_0602 |        | transposase in ISPg1                                               | -2.36492   | 5.00E-05 | 0.00026  |
| PGN_0603 |        | hypothetical protein                                               | -0.138996  | 0.75695  | 0.833271 |
| PGN_0604 |        | ferritin                                                           | -2.07196   | 0.0001   | 0.000483 |
| PGN_0605 |        | transposase in ISPg1                                               | -2.31118   | 5.00E-05 | 0.00026  |
| PGN_0606 |        | glucosamine-6-phosphate isomerase                                  | -0.997726  | 0.0004   | 0.001607 |
| PGN_0607 |        | dipeptidyl peptidase 11                                            | 0.562294   | 0.05275  | 0.101267 |
| PGN_0608 |        | conserved hypothetical protein                                     | -0.753096  | 0.00735  | 0.019634 |
| PGN_0609 |        | probable DNA mismatch repair protein                               | -0.892585  | 0.00205  | 0.006553 |
| PGN_0610 |        | conserved hypothetical protein with DUF1015 domain                 | 1.05589    | 0.0004   | 0.001607 |
| PGN_0611 |        | D-3-phosphoglycerate dehydrogenase                                 | 1.07244    | 0.00035  | 0.001436 |
| PGN_0612 |        | phosphoserine aminotransferase                                     | 0.639798   | 0.0354   | 0.073243 |
| PGN_0613 |        | UDP-glucose 6-dehydrogenase                                        | -0.640071  | 0.0245   | 0.053774 |
| PGN_0614 |        | DNA-binding protein histone-like family                            | -0.494056  | 0.07585  | 0.136851 |
| PGN_0615 |        | hypothetical protein                                               | -0.596006  | 0.11135  | 0.186371 |
| PGN_0616 |        | probable elongation factor P                                       | 1.21019    | 5.00E-05 | 0.00026  |
| PGN_0617 |        | conserved hypothetical protein                                     | 0.0495808  | 0.86125  | 0.906535 |
| PGN_0618 |        | aspartate-semialdehyde dehydrogenase                               | -0.311589  | 0.29135  | 0.407278 |
| PGN_0619 |        | conserved hypothetical protein                                     | -0.096502  | 0.9662   | 0.975464 |
| PGN_0620 | mraW   | putative S-adenosyl-methyltransferase MraW                         | -1.17532   | 0.00035  | 0.001436 |
| PGN_0621 |        | conserved hypothetical protein                                     | -0.726912  | 0.32365  | 0.442755 |
| PGN_0622 |        | penicillin-binding protein                                         | -0.207521  | 0.47035  | 0.583552 |
| PGN_0623 | murE   | UDP-N-acetylmuramoylalanine-D-glutamyl-2, 6-diaminopimelate ligase | 0.06748    | 0.8149   | 0.873136 |
| PGN_0624 | mraY   | phospho-N-acetylmuramoyl-pentapeptide- transferase                 | -0.176206  | 0.52695  | 0.639975 |
| PGN_0625 |        | UDP-N-acetylmuramoylalanine--D-glutamate ligase                    | -0.135034  | 0.62585  | 0.726518 |
| PGN_0626 |        | putative rod shape-determining protein RodA                        | 0.721579   | 0.2609   | 0.374764 |
| PGN_0627 | murG   | N-acetylglucosaminyl transferase                                   | -0.0635702 | 0.90475  | 0.938295 |

|          |       |                                                                         |           |          |          |
|----------|-------|-------------------------------------------------------------------------|-----------|----------|----------|
| PGN_0628 | murC  | UDP-N-acetylmuramate-alanine ligase                                     | 0.374686  | 0.52265  | 0.635841 |
| PGN_0629 |       | putative cell division protein FtsQ                                     | 0.164726  | 0.8055   | 0.867869 |
| PGN_0630 |       | probable cell division protein FtsA                                     | -0.75875  | 0.01285  | 0.03123  |
| PGN_0631 |       | putative cell division protein FtsZ                                     | -1.27146  | 0.0001   | 0.000483 |
| PGN_0632 |       | conserved hypothetical protein                                          | -0.631681 | 0.02225  | 0.049916 |
| PGN_0633 |       | conserved hypothetical protein                                          | 1.92398   | 5.00E-05 | 0.00026  |
| PGN_0634 | panB  | 3-methyl-2-oxobutanoate hydroxymethyltransferase                        | 1.25486   | 5.00E-05 | 0.00026  |
| PGN_0635 | guaA  | glutamine-hydrolyzing GMP synthase                                      | 0.557515  | 0.05705  | 0.108349 |
| PGN_0636 | rpmE2 | 50S ribosomal protein L31                                               | 1.21542   | 0.00025  | 0.00108  |
| PGN_0637 | htrA  | putative heat shock-related protease htrA protein                       | -0.126277 | 0.66925  | 0.761007 |
| PGN_0638 | rpoD  | RNA polymerase sigma factor RpoD                                        | 0.374401  | 0.2194   | 0.325507 |
| PGN_0639 | rpsF  | 30S ribosomal protein S6                                                | 1.46637   | 5.00E-05 | 0.00026  |
| PGN_0640 | rpsR  | 30S ribosomal protein S18                                               | 1.37144   | 5.00E-05 | 0.00026  |
| PGN_0641 | rplI  | 50S ribosomal protein L9                                                | 1.2119    | 0.00025  | 0.00108  |
| PGN_0642 |       | conserved hypothetical protein                                          | -0.424954 | 0.1363   | 0.220336 |
| PGN_0643 |       | 3,4-dihydroxy-2-butanone 4-phosphate synthase                           | -0.779502 | 0.0097   | 0.024821 |
| PGN_0644 |       | transposase in ISPg1                                                    | -2.42908  | 5.00E-05 | 0.00026  |
| PGN_0645 |       | Por secretion system protein porQ                                       | 0.457662  | 0.10865  | 0.182426 |
| PGN_0646 | cmk   | probable cytidylate kinase                                              | 0.185177  | 0.80885  | 0.870041 |
| PGN_0647 | ispH  | hydroxymethylbutenyl pyrophosphate reductase                            | -0.104427 | 0.8568   | 0.904376 |
| PGN_0648 |       | conserved hypothetical protein                                          | -1.22943  | 0.0048   | 0.013662 |
| PGN_0649 |       | conserved hypothetical protein                                          | 0.261035  | 0.3631   | 0.481345 |
| PGN_0650 |       | conserved hypothetical protein                                          | 0.309832  | 0.3405   | 0.459394 |
| PGN_0651 |       | conserved hypothetical protein                                          | -0.199156 | 0.7047   | 0.792974 |
| PGN_0652 |       | conserved hypothetical protein                                          | -0.36026  | 0.4836   | 0.596169 |
| PGN_0653 |       | conserved hypothetical protein                                          | -3.09398  | 5.00E-05 | 0.00026  |
| PGN_0654 |       | conserved hypothetical protein                                          | -2.8665   | 5.00E-05 | 0.00026  |
| PGN_0655 |       | conserved hypothetical protein                                          | -2.29985  | 0.07795  | 0.139576 |
| PGN_0656 |       | conserved hypothetical protein                                          | -2.56003  | 5.00E-05 | 0.00026  |
| PGN_0657 |       | conserved hypothetical protein                                          | -3.02141  | 5.00E-05 | 0.00026  |
| PGN_0658 |       | GTP-binding elongation factor family protein TypA/BipA                  | 1.09959   | 0.0002   | 0.000895 |
| PGN_0659 |       | 35 kDa hemin binding protein                                            | 0.947194  | 0.00405  | 0.011763 |
| PGN_0660 |       | putative alkyl hydroperoxide reductase C subunit                        | -2.7331   | 5.00E-05 | 0.00026  |
| PGN_0661 |       | alkyl hydroperoxide reductase F subunit                                 | -1.41407  | 0.0001   | 0.000483 |
| PGN_0662 |       | ATP-dependent protease La                                               | 0.489482  | 0.19     | 0.290388 |
| PGN_0663 |       | conserved hypothetical protein                                          | 0.366692  | 0.719    | 0.803966 |
| PGN_0664 |       | conserved hypothetical protein                                          | 0.919131  | 0.21405  | 0.320023 |
| PGN_0665 | tpiA  | putative triosephosphate isomerase                                      | 0.948069  | 0.0016   | 0.005241 |
| PGN_0666 |       | conserved hypothetical protein                                          | 1.05616   | 0.00045  | 0.001764 |
| PGN_0667 | folE  | putative GTP cyclohydrolase I                                           | 1.0248    | 0.00055  | 0.002076 |
| PGN_0668 |       | RNA-binding protein                                                     | 2.70212   | 5.00E-05 | 0.00026  |
| PGN_0669 |       | ABC transporter ATP-binding protein                                     | 1.27725   | 5.00E-05 | 0.00026  |
| PGN_0670 | ppnK  | probable inorganic polyphosphate/ATP-NAD kinase                         | 0.926252  | 0.00135  | 0.004519 |
| PGN_0671 |       | putative pyridoxal phosphate biosynthetic protein                       | 1.05062   | 0.00035  | 0.001436 |
| PGN_0672 |       | probable biopolymer transport protein                                   | 1.26701   | 0.00045  | 0.001764 |
| PGN_0673 |       | probable biopolymer transport protein                                   | 1.41246   | 0.0047   | 0.013395 |
| PGN_0674 |       | conserved hypothetical protein                                          | 1.05642   | 0.0004   | 0.001607 |
| PGN_0675 |       | conserved hypothetical protein                                          | 1.12536   | 0.0001   | 0.000483 |
| PGN_0676 | prmA  | putative ribosomal protein L11 methyltransferase                        | 1.65352   | 0.0115   | 0.028602 |
| PGN_0677 |       | putative multi antimicrobial extrusion protein MatE                     | 1.16679   | 0.03155  | 0.067372 |
| PGN_0678 |       | thiamine monophosphate kinase                                           | 0.264001  | 0.53345  | 0.646027 |
| PGN_0679 |       | putative tetraacyldisaccharide 4'-kinase                                | -0.156972 | 0.5857   | 0.690069 |
| PGN_0680 |       | signal peptide peptidase SppA 67K type                                  | -0.445362 | 0.13075  | 0.212819 |
| PGN_0681 |       | hypothetical protein                                                    | 1.38877   | 0.2738   | 0.387838 |
| PGN_0682 |       | hypothetical protein                                                    | -0.922035 | 0.71725  | 0.802852 |
| PGN_0683 |       | TonB-linked receptor Tlr                                                | -1.29541  | 5.00E-05 | 0.00026  |
| PGN_0684 |       | conserved hypothetical protein with adenosylcobinamide amidohydrolase d | -1.32007  | 5.00E-05 | 0.00026  |
| PGN_0685 |       | putative iron compound ABC transporter ATP-binding protein              | -1.22345  | 5.00E-05 | 0.00026  |
| PGN_0686 |       | putative iron compound ABC transporter permease protein                 | -1.22094  | 0.01205  | 0.029693 |
| PGN_0687 |       | putative iron compound ABC transporter periplasmic iron compound-bindin | -1.14108  | 0.00295  | 0.008947 |
| PGN_0688 |       | conserved hypothetical protein                                          | 1.16497   | 0.0003   | 0.00126  |
| PGN_0689 |       | conserved hypothetical protein                                          | 1.16483   | 0.00045  | 0.001764 |

|          |       |                                                                           |            |          |          |
|----------|-------|---------------------------------------------------------------------------|------------|----------|----------|
| PGN_0690 |       | conserved hypothetical protein                                            | 0.959206   | 0.0006   | 0.002241 |
| PGN_0691 |       | conserved hypothetical protein                                            | 0.669793   | 0.0182   | 0.042117 |
| PGN_0692 |       | phosphoserine phosphatase                                                 | 0.606633   | 0.0415   | 0.083986 |
| PGN_0693 |       | conserved hypothetical protein                                            | 0.544244   | 0.0686   | 0.126231 |
| PGN_0694 | rpmH  | 50S ribosomal protein L34                                                 | 1.22279    | 0.00015  | 0.000685 |
| PGN_0695 |       | probable septum formation protein Maf                                     | -0.120769  | 0.6564   | 0.750524 |
| PGN_0696 |       | probable hydrolase                                                        | -0.505721  | 0.0656   | 0.121657 |
| PGN_0697 |       | conserved hypothetical protein                                            | -1.07672   | 0.0574   | 0.108917 |
| PGN_0698 |       | probable nitroreductase                                                   | -1.35003   | 0.001    | 0.003462 |
| PGN_0699 |       | conserved hypothetical protein                                            | 1.85392    | 5.00E-05 | 0.00026  |
| PGN_0700 |       | putative oxidoreductase Gfo/Idh/MocA family                               | -0.102494  | 0.7092   | 0.79641  |
| PGN_0701 | lacZI | beta-galactosidase                                                        | 0.818574   | 0.0039   | 0.011468 |
| PGN_0702 |       | conserved hypothetical protein                                            | 0.883385   | 0.0054   | 0.015087 |
| PGN_0703 |       | hypothetical protein                                                      | 1.44386    | 0.0001   | 0.000483 |
| PGN_0704 | ihtA  | putative tonB-linked outer membrane receptor                              | 0.427146   | 0.1542   | 0.244083 |
| PGN_0705 | ihtB  | heme-binding protein FetB                                                 | 0.0173827  | 0.9575   | 0.969338 |
| PGN_0706 | ihtC  | putative exported periplasmic protein                                     | 0.712751   | 0.1142   | 0.190692 |
| PGN_0707 | ihtD  | putative iron compound ABC transporter permease protein                   | 0.434304   | 0.25165  | 0.363373 |
| PGN_0708 | ihtE  | putative iron compound ABC transporter ATP-binding protein                | 0.648173   | 0.0246   | 0.053882 |
| PGN_0709 |       | putative indolepyruvate ferredoxin oxidoreductase beta subunit            | -0.359049  | 0.21315  | 0.319125 |
| PGN_0710 |       | indolepyruvate ferredoxin oxidoreductase alpha subunit                    | -0.0766343 | 0.79465  | 0.858132 |
| PGN_0711 |       | putative oxidoreductase short chain dehydrogenase/reductase family        | -0.655238  | 0.0214   | 0.048366 |
| PGN_0712 |       | conserved hypothetical protein                                            | -0.868572  | 0.33405  | 0.453567 |
| PGN_0713 |       | saccharopine dehydrogenase                                                | -0.579559  | 0.0431   | 0.086503 |
| PGN_0714 |       | probable pyrazinamidase/nicotinamidase                                    | -0.405245  | 0.14725  | 0.235534 |
| PGN_0715 |       | outer membrane efflux protein                                             | -1.06297   | 0.001    | 0.003462 |
| PGN_0716 |       | ABC transporter permease                                                  | -0.679352  | 0.0468   | 0.092086 |
| PGN_0717 |       | conserved hypothetical protein                                            | -2.02997   | 5.00E-05 | 0.00026  |
| PGN_0718 |       | putative ABC transporter permease protein                                 | -0.0994058 | 0.7684   | 0.841524 |
| PGN_0719 |       | probable ABC transporter permease protein                                 | -0.396558  | 0.19905  | 0.302051 |
| PGN_0720 |       | putative ABC transporter permease protein                                 | -1.75601   | 5.00E-05 | 0.00026  |
| PGN_0721 |       | putative ABC transporter ATP-binding protein                              | -2.60154   | 5.00E-05 | 0.00026  |
| PGN_0722 |       | conserved hypothetical protein                                            | -1.90287   | 5.00E-05 | 0.00026  |
| PGN_0723 |       | succinate-semialdehyde dehydrogenase                                      | 1.72124    | 5.00E-05 | 0.00026  |
| PGN_0724 |       | NAD-dependent 4-hydroxybutyrate dehydrogenase                             | 0.121705   | 0.68615  | 0.77827  |
| PGN_0725 |       | 4-hydroxybutyrate CoA-transferase                                         | 0.16561    | 0.56375  | 0.672416 |
| PGN_0726 |       | conserved hypothetical protein                                            | -0.179057  | 0.51625  | 0.630216 |
| PGN_0727 |       | 4-hydroxybutyryl-CoA dehydratase                                          | -0.39531   | 0.2411   | 0.351096 |
| PGN_0728 |       | outer membrane protein 40 precursor                                       | -0.938723  | 0.0249   | 0.054483 |
| PGN_0729 |       | outer membrane protein 41 precursor                                       | -0.919581  | 0.02295  | 0.051109 |
| PGN_0730 |       | hypothetical protein                                                      | 0.214584   | 0.58285  | 0.687853 |
| PGN_0731 |       | hypothetical protein                                                      | -0.502821  | 0.1266   | 0.207013 |
| PGN_0732 |       | conserved hypothetical protein                                            | -0.0998733 | 0.7179   | 0.803158 |
| PGN_0733 |       | alpha-glucan phosphorylase                                                | -0.427988  | 0.14335  | 0.230508 |
| PGN_0734 |       | conserved hypothetical protein                                            | -1.49142   | 0.00825  | 0.021711 |
| PGN_0735 |       | putative bifunctional cobalamin biosynthesis protein                      | -0.793036  | 0.00585  | 0.016091 |
| PGN_0736 |       | putative nicotinate-nucleotide-dimethylbenzimidazole phosphoribosyltransf | -0.687808  | 0.0169   | 0.039452 |
| PGN_0737 |       | probable cobalamin-5'-phosphate synthase                                  | -0.74811   | 0.01025  | 0.026072 |
| PGN_0738 |       | putative phosphoglycerate mutase                                          | -0.755382  | 0.0067   | 0.018171 |
| PGN_0739 |       | glutamate racemase                                                        | -0.743301  | 0.01235  | 0.030292 |
| PGN_0740 |       | conserved hypothetical protein                                            | -0.861876  | 0.00395  | 0.011552 |
| PGN_0741 |       | TonB-dependent receptor                                                   | -1.04899   | 0.0021   | 0.006663 |
| PGN_0742 |       | probable FKBP-type peptidyl-prolyl cis-trans isomerase                    | 1.61268    | 5.00E-05 | 0.00026  |
| PGN_0743 |       | probable FKBP-type peptidyl-prolyl cis-trans isomerase FkpA               | -0.0188845 | 0.94735  | 0.96089  |
| PGN_0744 |       | probable FKBP-type peptidyl-prolyl cis-trans isomerase                    | 0.968931   | 0.0008   | 0.002848 |
| PGN_0745 |       | hypothetical protein                                                      | -0.408271  | 0.39515  | 0.512036 |
| PGN_0746 |       | conserved hypothetical protein                                            | 1.93596    | 5.00E-05 | 0.00026  |
| PGN_0747 |       | probable anthranilate synthase component II                               | 0.505567   | 0.06975  | 0.128015 |
| PGN_0748 |       | gingipain-sensitive ligand A                                              | -2.28975   | 5.00E-05 | 0.00026  |
| PGN_0749 |       | transposase in ISPg1                                                      | -2.48543   | 5.00E-05 | 0.00026  |
| PGN_0750 |       | putative copper homeostasis protein CutC                                  | 0.160025   | 0.58555  | 0.690069 |
| PGN_0751 |       | putative cationic transporter                                             | 0.806273   | 0.0047   | 0.013395 |

|          |      |                                                       |            |          |          |
|----------|------|-------------------------------------------------------|------------|----------|----------|
| PGN_0752 |      | hypothetical protein                                  | -1.79924   | 0.05005  | 0.097223 |
| PGN_0753 |      | probable two component system response regulator      | -1.59375   | 5.00E-05 | 0.00026  |
| PGN_0754 |      | conserved hypothetical protein                        | 1.12869    | 0.00065  | 0.00239  |
| PGN_0755 |      | hypothetical protein                                  | 0.324381   | 0.50265  | 0.615378 |
| PGN_0756 |      | prolyl oligopeptidase                                 | 0.0195176  | 0.9458   | 0.960233 |
| PGN_0757 |      | conserved hypothetical protein                        | 0.417261   | 0.15475  | 0.244772 |
| PGN_0758 |      | conserved hypothetical protein                        | 2.44064    | 5.00E-05 | 0.00026  |
| PGN_0759 |      | conserved hypothetical protein                        | 1.04505    | 0.00025  | 0.00108  |
| PGN_0760 | ddl  | putative D-alanine--D-alanine ligase                  | 1.02701    | 0.00025  | 0.00108  |
| PGN_0761 |      | ribosomal large subunit pseudouridine synthase        | -0.230476  | 0.4168   | 0.534237 |
| PGN_0762 |      | conserved hypothetical protein                        | -0.595503  | 0.0434   | 0.086678 |
| PGN_0763 |      | conserved hypothetical protein                        | -0.691164  | 0.8132   | 0.872632 |
| PGN_0764 |      | putative riboflavin synthase alpha subunit            | 1.23954    | 0.00045  | 0.001764 |
| PGN_0765 |      | probable nitroreductase                               | 0.765671   | 0.1798   | 0.27779  |
| PGN_0766 |      | aminotransferase class V                              | 1.39364    | 5.00E-05 | 0.00026  |
| PGN_0767 | rnhB | putative ribonuclease HII                             | 1.98281    | 0.01515  | 0.036038 |
| PGN_0768 |      | conserved hypothetical protein                        | 0.844304   | 0.0878   | 0.153975 |
| PGN_0769 |      | putative cytosine/adenosine deaminase                 | 0.68143    | 0.08535  | 0.150635 |
| PGN_0770 |      | conserved hypothetical protein                        | 0.255927   | 0.41305  | 0.530068 |
| PGN_0771 |      | conserved hypothetical protein                        | 0.936498   | 0.1223   | 0.201145 |
| PGN_0772 |      | probable tRNA/rRNA methyltransferase                  | 0.626481   | 0.02035  | 0.046536 |
| PGN_0773 |      | putative lactoylglutathione lyase                     | 1.02824    | 0.00055  | 0.002076 |
| PGN_0774 |      | two-component system sensor histidine kinase          | 0.698319   | 0.013    | 0.031487 |
| PGN_0775 |      | two-component system response regulator               | 0.140758   | 0.60295  | 0.705377 |
| PGN_0776 |      | conserved hypothetical protein                        | 0.815526   | 0.17325  | 0.269233 |
| PGN_0777 |      | probable glycosyl transferase                         | 1.30112    | 5.00E-05 | 0.00026  |
| PGN_0778 | porT | Por secretion system protein porT/sprT                | 0.577577   | 0.04745  | 0.093193 |
| PGN_0779 | upp  | probable uracil phosphoribosyltransferase             | 0.933502   | 0.0543   | 0.103496 |
| PGN_0780 | prtQ | PrtQ, protease                                        | 0.809517   | 0.02775  | 0.06004  |
| PGN_0781 |      | DNA topoisomerase I                                   | 1.3813     | 5.00E-05 | 0.00026  |
| PGN_0782 | truA | putative tRNA pseudouridine synthase A                | 0.890123   | 0.0051   | 0.014324 |
| PGN_0783 |      | putative DNA-binding protein histone-like family      | -0.309383  | 0.335    | 0.454309 |
| PGN_0784 |      | hypothetical protein                                  | 0.278964   | 0.3209   | 0.440204 |
| PGN_0785 |      | hypothetical protein                                  | 0.202664   | 0.5322   | 0.645615 |
| PGN_0786 |      | conserved hypothetical protein                        | 1.17506    | 0.0001   | 0.000483 |
| PGN_0787 |      | conserved hypothetical protein                        | 0.338387   | 0.25175  | 0.363373 |
| PGN_0788 |      | peptidyl-dipeptidase                                  | 0.30759    | 0.2818   | 0.397056 |
| PGN_0789 |      | conserved hypothetical protein                        | 0.0771929  | 0.7852   | 0.853339 |
| PGN_0790 |      | transposase in ISPg3                                  | -0.501941  | 0.0902   | 0.157536 |
| PGN_0791 |      | putative cell division trigger factor                 | 2.72591    | 5.00E-05 | 0.00026  |
| PGN_0792 |      | polyribonucleotide nucleotidyltransferase             | 0.364088   | 0.22975  | 0.337569 |
| PGN_0793 |      | 4-alpha-glucanotransferase                            | -0.0470892 | 0.86535  | 0.90963  |
| PGN_0794 |      | conserved hypothetical protein                        | -0.116662  | 0.6712   | 0.762532 |
| PGN_0795 |      | conserved hypothetical protein                        | 0.572559   | 0.04085  | 0.082828 |
| PGN_0796 |      | hypothetical protein                                  | -0.190202  | 1        | 1        |
| PGN_0797 |      | conserved hypothetical protein                        | 0          | 1        | 1        |
| PGN_0798 |      | conserved hypothetical protein                        | -0.761131  | 0.0083   | 0.021816 |
| PGN_0799 |      | putative acyl-CoA dehydrogenase                       | -0.174963  | 0.57925  | 0.684777 |
| PGN_0800 |      | putative electron transfer flavoprotein alpha subunit | -0.33748   | 0.26205  | 0.37544  |
| PGN_0801 |      | probable electron transfer flavoprotein beta subunit  | -0.470383  | 0.11975  | 0.198023 |
| PGN_0802 |      | probable glycoprotease                                | -0.804242  | 0.00705  | 0.018951 |
| PGN_0803 |      | conserved hypothetical protein                        | 1.00064    | 0.0014   | 0.004672 |
| PGN_0804 |      | conserved hypothetical protein                        | 0.915843   | 0.00465  | 0.013306 |
| PGN_0805 |      | conserved hypothetical protein                        | 0.901811   | 0.00425  | 0.012311 |
| PGN_0806 |      | putative MotA/TolQ/ExbB proton channel protein        | 0.879017   | 0.0057   | 0.015781 |
| PGN_0807 |      | putative DNase related protein                        | 0.857174   | 0.00395  | 0.011552 |
| PGN_0808 |      | probable isoprenyl synthetase                         | 0.243812   | 0.38215  | 0.50006  |
| PGN_0809 |      | putative TonB protein                                 | -1.21127   | 0.0001   | 0.000483 |
| PGN_0810 |      | conserved hypothetical protein                        | 2.35642    | 0.0018   | 0.005833 |
| PGN_0811 |      | conserved hypothetical protein                        | 2.02568    | 5.00E-05 | 0.00026  |
| PGN_0812 |      | conserved hypothetical protein                        | 0.915876   | 0.23685  | 0.346328 |
| PGN_0813 | obgE | GTP-binding protein                                   | 0.579376   | 0.0676   | 0.124823 |

|          |      |                                                                         |            |          |          |
|----------|------|-------------------------------------------------------------------------|------------|----------|----------|
| PGN_0814 | adk  | probable adenylate kinase                                               | 0.821219   | 0.0045   | 0.012947 |
| PGN_0815 |      | putative hypoxanthine phosphoribosyltransferase                         | 0.954004   | 0.00075  | 0.002697 |
| PGN_0816 |      | fructose-1,6-bisphosphatase                                             | -0.619151  | 0.0448   | 0.08889  |
| PGN_0817 |      | penicillin-binding protein 1A                                           | -0.254951  | 0.3815   | 0.499582 |
| PGN_0818 |      | conserved hypothetical protein                                          | 0.331734   | 0.2424   | 0.352507 |
| PGN_0819 | leuS | leucyl-tRNA synthetase                                                  | 0.63633    | 0.02595  | 0.056606 |
| PGN_0820 |      | hypothetical protein                                                    | 0.386291   | 0.34255  | 0.460992 |
| PGN_0821 |      | hypothetical protein                                                    | -0.75921   | 0.4675   | 0.581433 |
| PGN_0822 |      | conserved hypothetical protein                                          | 0.600592   | 0.4273   | 0.543767 |
| PGN_0823 |      | NAD-utilizing dehydrogenases                                            | 0.167579   | 0.65485  | 0.749786 |
| PGN_0824 |      | tRNA nucleotidyltransferase                                             | 0.404181   | 0.33995  | 0.459394 |
| PGN_0825 |      | conserved hypothetical protein                                          | 1.29459    | 0.0132   | 0.031899 |
| PGN_0826 |      | dihydroliipoamide dehydrogenase                                         | 1.76894    | 5.00E-05 | 0.00026  |
| PGN_0827 | nagB | glucosamine-6-phosphate isomerase                                       | 1.75643    | 5.00E-05 | 0.00026  |
| PGN_0828 |      | flavoprotein                                                            | 1.18163    | 5.00E-05 | 0.00026  |
| PGN_0829 |      | putative prolipoprotein diacylglycerol transferase                      | 1.83426    | 5.00E-05 | 0.00026  |
| PGN_0830 |      | meso-diaminopimelate D-dehydrogenase                                    | 1.69139    | 5.00E-05 | 0.00026  |
| PGN_0831 |      | probable nitrogen utilization substance protein                         | 1.52526    | 5.00E-05 | 0.00026  |
| PGN_0832 |      | Por secretion system protein sov/gliding motility protein SprA          | 1.30212    | 0.0001   | 0.000483 |
| PGN_0833 | ruvA | probable Holliday junction DNA helicase RuvA                            | 1.06629    | 0.0005   | 0.001921 |
| PGN_0834 |      | transposase in ISPg1                                                    | -2.39159   | 5.00E-05 | 0.00026  |
| PGN_0835 |      | conserved hypothetical protein                                          | 0.26866    | 0.5768   | 0.682842 |
| PGN_0836 |      | conserved hypothetical protein                                          | -1.14121   | 0.00035  | 0.001436 |
| PGN_0837 |      | conserved hypothetical protein                                          | -1.26064   | 0.00015  | 0.000685 |
| PGN_0838 |      | conserved hypothetical protein                                          | -1.89767   | 5.00E-05 | 0.00026  |
| PGN_0839 |      | transposase in ISPg2                                                    | 1.15806    | 0.00045  | 0.001764 |
| PGN_0840 |      | conserved hypothetical protein                                          | -0.873196  | 0.11705  | 0.194535 |
| PGN_0841 | ispD | putative 4-diphosphocytidyl-2C-methyl-D-erythritol synthase             | -0.196534  | 0.56595  | 0.673886 |
| PGN_0842 |      | transposase in ISPg1                                                    | -2.403     | 5.00E-05 | 0.00026  |
| PGN_0843 |      | conserved hypothetical protein                                          | -1.1909    | 0.009    | 0.023254 |
| PGN_0844 |      | conserved hypothetical protein                                          | -0.993291  | 0.0119   | 0.029425 |
| PGN_0845 |      | conserved hypothetical protein                                          | -1.77809   | 0.0863   | 0.151845 |
| PGN_0846 |      | conserved hypothetical protein                                          | -1.56851   | 0.0239   | 0.052729 |
| PGN_0847 |      | conserved hypothetical protein                                          | -0.992455  | 0.0477   | 0.093511 |
| PGN_0848 |      | conserved hypothetical protein                                          | -1.12772   | 0.0149   | 0.035603 |
| PGN_0849 |      | conserved hypothetical protein                                          | -0.519318  | 0.36965  | 0.487297 |
| PGN_0850 |      | conserved hypothetical protein                                          | -0.991682  | 0.2568   | 0.36941  |
| PGN_0851 |      | conserved hypothetical protein                                          | -1.07529   | 0.0645   | 0.120246 |
| PGN_0852 |      | immunoreactive 47 kDa antigen                                           | 2.86831    | 5.00E-05 | 0.00026  |
| PGN_0853 |      | conserved hypothetical protein                                          | 1.95227    | 0.0004   | 0.001607 |
| PGN_0854 |      | hypothetical protein                                                    | 0.238538   | 0.6247   | 0.725579 |
| PGN_0855 |      | hypothetical protein                                                    | -0.715211  | 0.163    | 0.255543 |
| PGN_0856 |      | putative A/G-specific adenine glycosylase                               | -0.792166  | 0.005    | 0.014118 |
| PGN_0857 |      | conserved hypothetical protein                                          | 0.474728   | 0.08825  | 0.154598 |
| PGN_0858 |      | probable ABC transporter ATP-binding protein                            | 0.150097   | 0.6695   | 0.761007 |
| PGN_0859 |      | probable ABC transporter permease protein                               | 0.781869   | 0.10475  | 0.177276 |
| PGN_0860 |      | conserved hypothetical protein                                          | 1.79604    | 5.00E-05 | 0.00026  |
| PGN_0861 |      | conserved hypothetical protein                                          | 0.58151    | 0.0389   | 0.07948  |
| PGN_0862 |      | Type III restriction enzyme, res subunit                                | 0.386654   | 0.25585  | 0.368293 |
| PGN_0863 |      | DNA methylase N-4/N-6                                                   | 0.980014   | 0.0497   | 0.09672  |
| PGN_0864 |      | transposase in ISPg3                                                    | -0.494054  | 0.0971   | 0.166446 |
| PGN_0865 | purH | bifunctional phosphoribosylaminoimidazolecarboxamide formyltransferase/ | -0.665488  | 0.03735  | 0.076755 |
| PGN_0866 |      | cell shape-determining protein MreB                                     | -0.0505298 | 0.8594   | 0.906222 |
| PGN_0867 |      | probable cell shape-determining protein MreC                            | 1.18728    | 0.06515  | 0.121232 |
| PGN_0868 |      | conserved hypothetical protein                                          | 1.32286    | 0.26615  | 0.380036 |
| PGN_0869 |      | penicillin-binding protein 2                                            | 1.45157    | 0.0082   | 0.02166  |
| PGN_0870 |      | putative rod shape-determining protein RodA                             | 0.654077   | 0.23315  | 0.341622 |
| PGN_0871 |      | conserved hypothetical protein                                          | -0.452894  | 0.10665  | 0.179919 |
| PGN_0872 |      | DNA-binding protein histone-like family                                 | -0.658762  | 0.0259   | 0.056555 |
| PGN_0873 |      | conserved hypothetical protein                                          | 0.182638   | 0.52035  | 0.63413  |
| PGN_0874 |      | conserved hypothetical protein                                          | 0.242004   | 0.3981   | 0.514918 |
| PGN_0875 | gyrA | DNA gyrase A subunit                                                    | 0.591097   | 0.0576   | 0.109199 |

|          |      |                                                                 |             |          |          |
|----------|------|-----------------------------------------------------------------|-------------|----------|----------|
| PGN_0876 |      | TPR domain protein                                              | 0.931781    | 0.00295  | 0.008947 |
| PGN_0877 |      | SNF2-related helicase                                           | 0.808512    | 0.00505  | 0.014222 |
| PGN_0878 |      | hypothetical protein                                            | 1.09959     | 0.0009   | 0.003178 |
| PGN_0879 |      | transposase in ISPg3                                            | -0.336543   | 0.2507   | 0.362595 |
| PGN_0880 | tnaA | tyrosine phenol-lyase                                           | 1.0181      | 0.00075  | 0.002697 |
| PGN_0881 |      | conserved hypothetical protein                                  | 1.63255     | 5.00E-05 | 0.00026  |
| PGN_0882 |      | conserved hypothetical protein                                  | 1.78743     | 5.00E-05 | 0.00026  |
| PGN_0883 |      | conserved hypothetical protein                                  | 1.59081     | 5.00E-05 | 0.00026  |
| PGN_0884 |      | organic solvent tolerance protein OstA                          | 1.55885     | 5.00E-05 | 0.00026  |
| PGN_0885 |      | probable nitroimidazole resistance protein                      | 0.444695    | 0.18685  | 0.285984 |
| PGN_0886 |      | putative cation efflux protein                                  | -0.201514   | 0.5104   | 0.62379  |
| PGN_0887 |      | conserved hypothetical protein                                  | 0.822273    | 0.34615  | 0.464662 |
| PGN_0888 |      | conserved hypothetical protein                                  | 1.14494     | 0.0094   | 0.02417  |
| PGN_0889 |      | potassium uptake protein TrkA                                   | 1.00826     | 0.0007   | 0.002543 |
| PGN_0890 |      | putative TonB-dependent outer membrane receptor protein         | -0.904961   | 0.0023   | 0.007212 |
| PGN_0891 |      | dioxygenase                                                     | 0.521515    | 0.0609   | 0.114943 |
| PGN_0892 |      | hypothetical protein                                            | -0.306206   | 0.4323   | 0.548817 |
| PGN_0893 |      | fumarate hydratase class I anaerobic                            | 0.828502    | 0.00495  | 0.013995 |
| PGN_0894 |      | DNA polymerase III, gamma and tau subunits                      | -0.764122   | 0.0103   | 0.026137 |
| PGN_0895 |      | ferredoxin 4Fe-4S                                               | -2.14764    | 5.00E-05 | 0.00026  |
| PGN_0896 |      | probable D-alanyl-D-alanine carboxypeptidase                    | -0.258841   | 0.3693   | 0.487297 |
| PGN_0897 |      | conserved hypothetical protein                                  | -0.0713344  | 0.94045  | 0.958917 |
| PGN_0898 |      | probable peptidylarginine deiminase                             | 1.00888     | 0.00205  | 0.006553 |
| PGN_0899 |      | conserved hypothetical protein                                  | #NAME?      | 5.00E-05 | 0.00026  |
| PGN_0900 |      | thiol protease                                                  | 2.57956     | 5.00E-05 | 0.00026  |
| PGN_0901 | ribH | putative riboflavin synthase beta subunit                       | 2.94772     | 5.00E-05 | 0.00026  |
| PGN_0902 |      | conserved hypothetical protein                                  | 1.68133     | 5.00E-05 | 0.00026  |
| PGN_0903 | fimR | two-component system response regulator FimR                    | 0.132809    | 0.63625  | 0.735841 |
| PGN_0904 | fimS | two-component system sensor histidine kinase FimS               | -0.00795374 | 0.97795  | 0.984889 |
| PGN_0905 |      | putative dihydroorotate dehydrogenase                           | -0.607985   | 0.02935  | 0.063117 |
| PGN_0906 |      | probable dihydroorotate dehydrogenase electron transfer subunit | -0.614044   | 0.03265  | 0.069235 |
| PGN_0907 |      | conserved hypothetical protein                                  | -0.376558   | 0.1914   | 0.292108 |
| PGN_0908 |      | hypothetical protein                                            | 0.280479    | 1        | 1        |
| PGN_0909 |      | transposase in ISPg3                                            | -0.522801   | 0.08435  | 0.149154 |
| PGN_0910 |      | conserved hypothetical protein                                  | 0.34612     | 0.25135  | 0.363289 |
| PGN_0911 |      | putative ribonuclease H                                         | -0.673325   | 0.01725  | 0.040137 |
| PGN_0912 |      | conserved hypothetical protein                                  | -0.46287    | 0.0963   | 0.165465 |
| PGN_0913 |      | putative acetyltransferase                                      | -0.788849   | 0.0047   | 0.013395 |
| PGN_0914 |      | peptidase M24 family                                            | -0.722722   | 0.01555  | 0.036784 |
| PGN_0915 |      | conserved hypothetical protein                                  | -1.92986    | 5.00E-05 | 0.00026  |
| PGN_0916 | dnaK | molecular chaperone DnaK                                        | -0.910561   | 0.00855  | 0.02228  |
| PGN_0917 |      | tyrosine type site-specific recombinase                         | -0.804486   | 0.00585  | 0.016091 |
| PGN_0918 |      | transposase in ISPg1                                            | -2.48737    | 5.00E-05 | 0.00026  |
| PGN_0919 |      | hypothetical protein                                            | 0.518386    | 0.1342   | 0.217602 |
| PGN_0920 |      | putative partial excisionase                                    | -0.00155837 | 0.92225  | 0.949454 |
| PGN_0921 |      | hypothetical protein                                            | -2.91817    | 0.1069   | 0.180055 |
| PGN_0922 |      | conserved hypothetical protein                                  | -1.33784    | 0.00975  | 0.024919 |
| PGN_0923 |      | putative DNA primase                                            | -0.635139   | 0.2126   | 0.318526 |
| PGN_0924 |      | mobilization protein                                            | -1.32887    | 0.22485  | 0.332665 |
| PGN_0925 |      | putative mobilization protein                                   | -0.893715   | 0.14585  | 0.233821 |
| PGN_0926 |      | conserved hypothetical protein                                  | -0.882221   | 0.05125  | 0.099282 |
| PGN_0927 |      | conserved hypothetical protein                                  | -1.73307    | 5.00E-05 | 0.00026  |
| PGN_0928 |      | conserved hypothetical protein                                  | -1.24794    | 0.0183   | 0.042303 |
| PGN_0929 |      | conserved hypothetical protein                                  | -1.7577     | 5.00E-05 | 0.00026  |
| PGN_0930 |      | hypothetical protein                                            | -1.5069     | 5.00E-05 | 0.00026  |
| PGN_0931 |      | conserved hypothetical protein                                  | -1.73454    | 5.00E-05 | 0.00026  |
| PGN_0932 |      | probable GCN5-related N-acetyltransferase                       | -1.39223    | 5.00E-05 | 0.00026  |
| PGN_0933 |      | probable transcriptional regulator                              | -0.641709   | 0.0208   | 0.047362 |
| PGN_0934 |      | transposase in ISPg3                                            | -0.398127   | 0.18105  | 0.27919  |
| PGN_0935 |      | conserved hypothetical protein                                  | -0.394907   | 0.21865  | 0.325223 |
| PGN_0936 |      | putative glycerate dehydrogenase                                | -1.82595    | 5.00E-05 | 0.00026  |
| PGN_0937 |      | hypothetical protein                                            | -0.546173   | 0.1564   | 0.247198 |



|          |      |                                                                |            |          |          |
|----------|------|----------------------------------------------------------------|------------|----------|----------|
| PGN_0938 |      | 8-amino-7-oxononanoate synthase                                | -0.0296977 | 0.9263   | 0.951988 |
| PGN_0939 |      | conserved hypothetical protein                                 | -0.153544  | 0.8257   | 0.881923 |
| PGN_0940 |      | partial transposase in ISPg2                                   | 0.463878   | 0.2008   | 0.304273 |
| PGN_0941 |      | conserved hypothetical protein                                 | 0.20091    | 0.4796   | 0.592955 |
| PGN_0942 |      | conserved hypothetical protein                                 | 0.282783   | 0.32135  | 0.440322 |
| PGN_0943 |      | alginate O-acetyltransferase                                   | 0.825348   | 0.00445  | 0.012838 |
| PGN_0944 |      | transposase in ISPg3                                           | -0.463326  | 0.1025   | 0.17416  |
| PGN_0945 |      | putative TetR family transcriptional regulator                 | 1.56209    | 5.00E-05 | 0.00026  |
| PGN_0946 |      | conserved hypothetical protein                                 | 1.06513    | 0.0003   | 0.00126  |
| PGN_0947 |      | conserved hypothetical protein                                 | 0.951215   | 0.00145  | 0.004794 |
| PGN_0948 |      | conserved hypothetical protein                                 | 0.520632   | 0.07065  | 0.129182 |
| PGN_0949 |      | ABC transporter ATP-binding protein                            | 0.859473   | 0.00275  | 0.008448 |
| PGN_0950 |      | ABC transporter ATP-binding protein                            | 0.638243   | 0.02045  | 0.046715 |
| PGN_0951 |      | conserved hypothetical protein                                 | -0.544398  | 0.08765  | 0.153966 |
| PGN_0952 |      | carboxyl-terminal processing protease                          | 0.477928   | 0.1202   | 0.198377 |
| PGN_0953 |      | transposase in ISPg3                                           | -0.286624  | 0.32965  | 0.448737 |
| PGN_0954 |      | partial transposase in ISPg6                                   | 0.370783   | 0.37995  | 0.498406 |
| PGN_0955 |      | transposase in ISPg3                                           | -0.682695  | 0.0193   | 0.044373 |
| PGN_0956 |      | hypothetical protein                                           | -0.546067  | 0.10775  | 0.1812   |
| PGN_0957 |      | conserved hypothetical protein                                 | -1.31023   | 0.00015  | 0.000685 |
| PGN_0958 |      | conserved hypothetical protein                                 | -2.73918   | 0.0331   | 0.069772 |
| PGN_0959 |      | probable transcriptional regulator                             | -2.51179   | 5.00E-05 | 0.00026  |
| PGN_0960 |      | conserved hypothetical protein                                 | -1.44521   | 5.00E-05 | 0.00026  |
| PGN_0961 |      | conserved hypothetical protein                                 | 0.0434317  | 1        | 1        |
| PGN_0962 | thrS | threonyl-tRNA synthetase                                       | 1.34908    | 5.00E-05 | 0.00026  |
| PGN_0963 | infC | translation initiation factor IF-3                             | 2.23303    | 5.00E-05 | 0.00026  |
| PGN_0964 | rpmI | probable 50S ribosomal protein L35                             | 1.81472    | 5.00E-05 | 0.00026  |
| PGN_0965 | rpmI | putative 50S ribosomal protein L20                             | 1.80925    | 5.00E-05 | 0.00026  |
| PGN_0966 |      | partial transposase in ISPg1                                   | -2.90815   | 5.00E-05 | 0.00026  |
| PGN_0967 |      | partial transposase in ISPg1                                   | -2.76091   | 5.00E-05 | 0.00026  |
| PGN_0968 |      | conserved hypothetical protein                                 | -0.32141   | 0.2705   | 0.384956 |
| PGN_0969 |      | conserved hypothetical protein                                 | -1.62325   | 0.00465  | 0.013306 |
| PGN_0970 |      | putative RNA polymerase sigma-70 factor ECF subfamily          | -0.513006  | 0.16405  | 0.256245 |
| PGN_0971 |      | transposase in ISPg1                                           | -2.40758   | 5.00E-05 | 0.00026  |
| PGN_0972 |      | TPR domain protein                                             | -1.26081   | 0.00015  | 0.000685 |
| PGN_0973 |      | conserved hypothetical protein                                 | 0.926916   | 0.00105  | 0.003606 |
| PGN_0974 |      | putative shikimate 5-dehydrogenase                             | 0.721306   | 0.07415  | 0.134353 |
| PGN_0975 | ubiE | putative ubiquinone/menaquinone biosynthesis methyltransferase | 0.966623   | 0.01555  | 0.036784 |
| PGN_0976 |      | phosphoribosylaminoimidazole-succinocarboxamide synthase       | 1.09607    | 0.00015  | 0.000685 |
| PGN_0977 |      | phosphate starvation-inducible PhoH-like protein               | 0.953396   | 0.001    | 0.003462 |
| PGN_0978 |      | hypothetical protein                                           | 0.703421   | 0.33545  | 0.454309 |
| PGN_0979 |      | hypothetical protein                                           | 0.876928   | 0.46365  | 0.578272 |
| PGN_0980 |      | putative alpha-1,2-mannosidase family protein                  | -0.251379  | 0.36055  | 0.479457 |
| PGN_0981 |      | S-adenosylmethionine:tRNA ribosyltransferase-isomerase         | 0.14297    | 0.61715  | 0.71877  |
| PGN_0982 |      | putative Mrr restriction system protein                        | -0.081929  | 0.77365  | 0.844667 |
| PGN_0983 |      | hypothetical protein                                           | 4.2373     | 5.00E-05 | 0.00026  |
| PGN_0984 |      | probable phosphatidylserine decarboxylase proenzyme            | -0.596272  | 0.03695  | 0.07608  |
| PGN_0985 |      | probable phosphatidylserine synthase                           | 0.278051   | 0.3291   | 0.448275 |
| PGN_0986 |      | hypothetical protein                                           | 1.17902    | 0.00135  | 0.004519 |
| PGN_0987 |      | prolyl-tRNA synthetase                                         | 0.50227    | 0.0904   | 0.157713 |
| PGN_0988 |      | hypothetical protein                                           | -0.216744  | 0.4288   | 0.545278 |
| PGN_0989 | trmB | putative methyltransferase                                     | 0.391831   | 0.18565  | 0.285172 |
| PGN_0990 |      | ATP-binding protein Mrp/Nbp35 family                           | 0.698279   | 0.01665  | 0.039083 |
| PGN_0991 |      | putative ribonuclease BN                                       | 0.932342   | 0.0013   | 0.004379 |
| PGN_0992 |      | putative riboflavin biosynthesis protein                       | 0.218109   | 0.654    | 0.749786 |
| PGN_0993 |      | putative peptidase M23/M37 family                              | 0.109919   | 0.7588   | 0.834445 |
| PGN_0994 |      | conserved hypothetical protein                                 | -0.0668754 | 0.86915  | 0.912436 |
| PGN_0995 |      | TPR domain protein                                             | -0.827107  | 0.07075  | 0.129182 |
| PGN_0996 |      | TPR domain protein                                             | 1.22371    | 5.00E-05 | 0.00026  |
| PGN_0997 | dut  | putative deoxyuridine 5'-triphosphate nucleotidohydrolase      | 1.12425    | 0.00075  | 0.002697 |
| PGN_0998 |      | 4-hydroxy-3-methylbut-2-en-1-yl diphosphate synthase           | 0.630276   | 0.0336   | 0.070339 |
| PGN_0999 |      | putative phosphoribosylaminoimidazole carboxylase              | -0.102171  | 0.72805  | 0.810255 |

|          |        |                                                                        |             |          |          |
|----------|--------|------------------------------------------------------------------------|-------------|----------|----------|
| PGN_1000 |        | putative glycine cleavage system H protein                             | -0.451544   | 0.12485  | 0.204623 |
| PGN_1001 |        | conserved hypothetical protein                                         | 0.303064    | 0.27845  | 0.393378 |
| PGN_1002 |        | AMP nucleosidase                                                       | -0.039896   | 0.88845  | 0.928121 |
| PGN_1003 |        | conserved hypothetical protein                                         | 0.305382    | 0.27365  | 0.387838 |
| PGN_1004 |        | putative ABC transporter ATP-binding protein                           | -0.0201488  | 0.9425   | 0.960233 |
| PGN_1005 |        | probable ABC transporter permease protein                              | 0.108849    | 0.70385  | 0.792661 |
| PGN_1006 |        | transposase in ISPg3                                                   | -0.501066   | 0.0883   | 0.154598 |
| PGN_1007 |        | conserved hypothetical protein                                         | 0.834482    | 0.10905  | 0.182953 |
| PGN_1008 |        | partial transposase in ISPg1                                           | -2.01051    | 5.00E-05 | 0.00026  |
| PGN_1009 |        | calcium-transporting ATPase                                            | -0.727521   | 0.03135  | 0.06708  |
| PGN_1010 |        | conserved hypothetical protein                                         | 0.680235    | 0.2644   | 0.378298 |
| PGN_1011 |        | xanthine/uracil/vitamin C permease                                     | 0.659515    | 0.0167   | 0.039157 |
| PGN_1012 |        | putative 4-diphosphocytidyl-2C-methyl-D-erythritol kinase              | 0.818222    | 0.0667   | 0.123375 |
| PGN_1013 |        | putative Fe-S oxidoreductase                                           | 0.788871    | 0.0391   | 0.079812 |
| PGN_1014 |        | elongation factor G                                                    | -1.24542    | 0.00035  | 0.001436 |
| PGN_1015 |        | putative DNA polymerase III delta prime subunit                        | -0.972701   | 0.0016   | 0.005241 |
| PGN_1016 |        | conserved hypothetical protein                                         | 0.545178    | 0.07565  | 0.136722 |
| PGN_1017 |        | conserved hypothetical protein                                         | 0.412506    | 0.26885  | 0.38312  |
| PGN_1018 |        | conserved hypothetical protein                                         | -1.37717    | 5.00E-05 | 0.00026  |
| PGN_1019 |        | Por secretion system response regulatr protein porX                    | -0.50665    | 0.0862   | 0.151845 |
| PGN_1020 |        | probable ATP/GTP-binding transmembrane protein                         | 0.000652139 | 0.99865  | 0.99865  |
| PGN_1021 |        | hypothetical protein                                                   | 0.950376    | 0.2265   | 0.333715 |
| PGN_1022 |        | putative thymidine kinase                                              | -0.106691   | 0.7736   | 0.844667 |
| PGN_1023 |        | acid phosphatase OIpA                                                  | -0.0355282  | 0.93465  | 0.956208 |
| PGN_1024 |        | putative ribosome-binding factor A                                     | 0.159454    | 0.577    | 0.682842 |
| PGN_1025 |        | conserved hypothetical protein                                         | 0.780553    | 0.00525  | 0.014707 |
| PGN_1026 |        | glycosyl transferase family 2                                          | -0.903772   | 0.00295  | 0.008947 |
| PGN_1027 |        | dihydroorotase                                                         | -0.686632   | 0.0199   | 0.045605 |
| PGN_1028 |        | conserved hypothetical protein                                         | 0.0950739   | 0.7666   | 0.839985 |
| PGN_1029 |        | conserved hypothetical protein                                         | 0.420678    | 0.45705  | 0.572725 |
| PGN_1030 |        | hypothetical protein                                                   | 0.790993    | 0.12365  | 0.202969 |
| PGN_1031 |        | conserved hypothetical protein                                         | 0.0353417   | 0.9445   | 0.960233 |
| PGN_1032 |        | conserved hypothetical protein                                         | -4.09866    | 5.00E-05 | 0.00026  |
| PGN_1033 |        | O-antigen flippase                                                     | -0.0909811  | 0.7534   | 0.829792 |
| PGN_1034 |        | conserved hypothetical protein                                         | 0.564565    | 0.0518   | 0.099803 |
| PGN_1035 |        | conserved hypothetical protein with DUF1063 domain                     | 0.836154    | 0.00395  | 0.011552 |
| PGN_1036 |        | putative G/U mismatch-specific DNA glycosylase                         | 0.699835    | 0.0136   | 0.032717 |
| PGN_1037 |        | conserved hypothetical protein                                         | -0.405444   | 0.2304   | 0.338291 |
| PGN_1038 |        | conserved hypothetical protein                                         | -1.15569    | 0.00015  | 0.000685 |
| PGN_1039 |        | putative alpha-1,2-mannosidase precursor                               | 0.0910982   | 0.74795  | 0.825498 |
| PGN_1040 |        | conserved hypothetical protein                                         | -2.14266    | 5.00E-05 | 0.00026  |
| PGN_1041 |        | cytochrome d ubiquinol oxidase subunit I                               | -1.55907    | 5.00E-05 | 0.00026  |
| PGN_1042 |        | cytochrome d ubiquinol oxidase subunit II                              | -1.66187    | 5.00E-05 | 0.00026  |
| PGN_1043 |        | conserved hypothetical protein                                         | -0.906275   | 0.055    | 0.104736 |
| PGN_1044 |        | alpha-amylase                                                          | -0.959435   | 0.01305  | 0.031572 |
| PGN_1045 | lacZII | beta-galactosidase                                                     | 0.622255    | 0.02325  | 0.051562 |
| PGN_1046 |        | putative DNA repair protein                                            | 1.32681     | 0.0004   | 0.001607 |
| PGN_1047 |        | hydroxylamine reductase                                                | 0.392508    | 0.2103   | 0.315747 |
| PGN_1048 |        | hypothetical protein                                                   | -0.977787   | 0.0424   | 0.085564 |
| PGN_1049 |        | putative alkaline phosphatase                                          | 0.580463    | 0.06145  | 0.115572 |
| PGN_1050 |        | conserved hypothetical protein                                         | 0.332185    | 0.24065  | 0.35068  |
| PGN_1051 |        | hypothetical protein                                                   | 0.166855    | 0.6193   | 0.72088  |
| PGN_1052 |        | conserved hypothetical protein                                         | -0.5642     | 0.11955  | 0.198023 |
| PGN_1053 |        | putative phospho-2-dehydro-3-deoxyheptonate aldolase/chorismate mutası | 0.0834273   | 0.87075  | 0.913665 |
| PGN_1054 | vimF   | virulence modulating gene F                                            | -0.0893688  | 0.9007   | 0.937239 |
| PGN_1055 | vimE   | virulence modulating gene E                                            | -0.50719    | 0.35395  | 0.473015 |
| PGN_1056 | vimA   | virulence modulating gene A                                            | -1.23992    | 0.00575  | 0.015898 |
| PGN_1057 | recA   | recombinase A                                                          | -1.89944    | 5.00E-05 | 0.00026  |
| PGN_1058 | bcp    | putative bacterioferritin comigratory protein                          | -1.70217    | 5.00E-05 | 0.00026  |
| PGN_1059 |        | conserved hypothetical protein                                         | -0.656322   | 0.7261   | 0.809354 |
| PGN_1060 |        | transposase in ISPg3                                                   | -0.690743   | 0.02385  | 0.052673 |
| PGN_1061 |        | conserved hypothetical protein                                         | -0.0580671  | 0.83375  | 0.886198 |

|          |      |                                                             |            |          |          |
|----------|------|-------------------------------------------------------------|------------|----------|----------|
| PGN_1062 | trmE | tRNA modification GTPase                                    | 1.12974    | 0.0001   | 0.000483 |
| PGN_1063 |      | partial transposase Orf2 in ISPg5                           | 0.251785   | 0.51     | 0.623659 |
| PGN_1064 |      | transposase in ISPg3                                        | -0.303441  | 0.3064   | 0.423313 |
| PGN_1065 |      | transposase in ISPg3                                        | -0.53561   | 0.07345  | 0.133312 |
| PGN_1066 |      | transposase in ISPg3                                        | -0.532925  | 0.07595  | 0.136916 |
| PGN_1067 |      | hypothetical protein                                        | -0.96533   | 0.0018   | 0.005833 |
| PGN_1068 |      | conserved hypothetical protein                              | -0.766875  | 0.15945  | 0.251459 |
| PGN_1069 |      | hypothetical protein                                        | -1.51608   | 0.0358   | 0.073998 |
| PGN_1070 |      | hypothetical protein                                        | -1.38827   | 0.09415  | 0.162699 |
| PGN_1071 |      | hypothetical protein                                        | -1.25052   | 0.0821   | 0.146146 |
| PGN_1072 |      | hypothetical protein                                        | -1.29075   | 0.04635  | 0.091454 |
| PGN_1073 |      | hypothetical protein                                        | -1.44417   | 5.00E-05 | 0.00026  |
| PGN_1074 |      | hypothetical protein                                        | -1.17414   | 5.00E-05 | 0.00026  |
| PGN_1075 |      | hypothetical protein                                        | -1.25837   | 0.12075  | 0.19913  |
| PGN_1076 |      | putative DNA methylase                                      | -1.06929   | 0.0003   | 0.00126  |
| PGN_1077 |      | transposase in ISPg1                                        | -2.40901   | 5.00E-05 | 0.00026  |
| PGN_1078 |      | GDP-mannose 4,6-dehydratase                                 | 0.267992   | 0.46985  | 0.583272 |
| PGN_1079 |      | GDP-fucose synthetase                                       | -0.179841  | 0.7123   | 0.798319 |
| PGN_1080 |      | branched-chain amino acid aminotransferase                  | 0.953671   | 0.00375  | 0.011073 |
| PGN_1081 |      | conserved hypothetical protein                              | -1.57568   | 5.00E-05 | 0.00026  |
| PGN_1082 |      | hypothetical protein                                        | 0.559427   | 0.2822   | 0.397357 |
| PGN_1083 |      | hypothetical protein                                        | 1.08884    | 0.14075  | 0.226669 |
| PGN_1084 |      | hypothetical protein                                        | 0.393955   | 0.5681   | 0.676026 |
| PGN_1085 | feoB | ferrous iron transport protein B                            | 0.0982291  | 0.7276   | 0.810178 |
| PGN_1086 |      | hypothetical protein                                        | 0.842771   | 0.0236   | 0.052229 |
| PGN_1087 |      | conserved hypothetical protein                              | 1.31512    | 0.00025  | 0.00108  |
| PGN_1088 | rpsA | 30S ribosomal protein S1                                    | 1.73005    | 5.00E-05 | 0.00026  |
| PGN_1089 |      | probable methyltransferase                                  | 2.14438    | 5.00E-05 | 0.00026  |
| PGN_1090 |      | conserved hypothetical protein                              | 1.05518    | 0.0004   | 0.001607 |
| PGN_1091 |      | conserved hypothetical protein                              | 0.625233   | 0.04315  | 0.086503 |
| PGN_1092 |      | ATP-dependent exoDNAse alpha subunit                        | 0.330667   | 0.2252   | 0.332721 |
| PGN_1093 |      | conserved hypothetical protein                              | 0.0338366  | 0.90285  | 0.937341 |
| PGN_1094 |      | glycine dehydrogenase                                       | 0.252595   | 0.40105  | 0.517476 |
| PGN_1095 |      | probable metallo-beta-lactamase                             | -0.0821152 | 0.87165  | 0.914159 |
| PGN_1096 | gidB | glucose-inhibited division protein B                        | -0.388311  | 0.28255  | 0.397587 |
| PGN_1097 |      | conserved hypothetical protein                              | -0.625622  | 0.03185  | 0.067809 |
| PGN_1098 |      | probable succinoglycan biosynthesis regulator ExsB protein  | 0.487449   | 0.08335  | 0.147754 |
| PGN_1099 |      | probable phosphoesterase                                    | 0.360434   | 0.23455  | 0.343201 |
| PGN_1100 |      | putative capsule biosynthesis protein CapA                  | 0.838069   | 0.00405  | 0.011763 |
| PGN_1101 |      | conserved hypothetical protein                              | 1.71019    | 0.003    | 0.009047 |
| PGN_1102 |      | hypothetical protein                                        | 0.917803   | 0.1141   | 0.190674 |
| PGN_1103 |      | dipeptidase                                                 | 0.167126   | 0.5751   | 0.68173  |
| PGN_1104 |      | chorismate synthase                                         | -0.681426  | 0.03275  | 0.06924  |
| PGN_1105 |      | probable FKBP-type peptidyl-prolyl cis-trans isomerase      | 0.0170226  | 0.954    | 0.966714 |
| PGN_1106 |      | conserved hypothetical protein                              | -0.263054  | 0.603    | 0.705377 |
| PGN_1107 |      | conserved hypothetical protein                              | -0.758177  | 0.0534   | 0.10233  |
| PGN_1108 |      | putative RNA polymerase ECF-type sigma factor               | -0.900029  | 0.003    | 0.009047 |
| PGN_1109 |      | hypothetical protein                                        | 1.48844    | 0.01335  | 0.032188 |
| PGN_1110 |      | partial transposase in ISPg1                                | -2.37873   | 5.00E-05 | 0.00026  |
| PGN_1111 |      | formate-tetrahydrofolate ligase                             | -0.155321  | 0.60715  | 0.709452 |
| PGN_1112 |      | PhoH-like protein                                           | -0.934176  | 0.00215  | 0.006791 |
| PGN_1113 | ruvC | putative crossover junction endodeoxyribonuclease RuvC      | -0.928778  | 0.0016   | 0.005241 |
| PGN_1114 |      | conserved hypothetical protein                              | -0.595114  | 0.0326   | 0.069198 |
| PGN_1115 |      | putative hemagglutinin                                      | -2.64142   | 5.00E-05 | 0.00026  |
| PGN_1116 |      | putative aminotransferase                                   | 0.552599   | 0.0623   | 0.116964 |
| PGN_1117 |      | acetyl-CoA synthetase                                       | 0.76311    | 0.00795  | 0.021104 |
| PGN_1118 |      | transposase in ISPg1                                        | -2.42819   | 5.00E-05 | 0.00026  |
| PGN_1119 |      | probable large conductance mechanosensitive channel protein | -1.67819   | 5.00E-05 | 0.00026  |
| PGN_1120 |      | putative NADPH-NAD transhydrogenase                         | 0.783174   | 0.00885  | 0.022922 |
| PGN_1121 |      | probable NADPH-NAD transhydrogenase alpha subunit           | 0.998603   | 0.47275  | 0.586095 |
| PGN_1122 |      | NADPH-NAD transhydrogenase beta subunit                     | 1.20935    | 0.0003   | 0.00126  |
| PGN_1123 |      | conserved hypothetical protein                              | 1.00725    | 0.15405  | 0.244027 |

|          |      |                                                                            |             |          |          |
|----------|------|----------------------------------------------------------------------------|-------------|----------|----------|
| PGN_1124 |      | Band 7 protein                                                             | -0.139219   | 0.6783   | 0.769776 |
| PGN_1125 |      | conserved hypothetical protein                                             | -0.626671   | 0.02305  | 0.051278 |
| PGN_1126 |      | putative error-prone repair: SOS-response transcriptional repressor UmuD h | -0.704425   | 0.01255  | 0.030641 |
| PGN_1127 |      | putative SOS mutagenesis and repair protein UmuC homolog                   | -0.230892   | 0.40615  | 0.522473 |
| PGN_1128 |      | L-lactate permease                                                         | 0.173598    | 0.55205  | 0.662149 |
| PGN_1129 |      | conserved hypothetical protein                                             | -0.699136   | 0.09205  | 0.159849 |
| PGN_1130 | murB | putative UDP-N-acetylenolpyruvoylglucosamine reductase                     | -0.42136    | 0.6244   | 0.725579 |
| PGN_1131 |      | conserved hypothetical protein                                             | -0.552229   | 0.0639   | 0.119231 |
| PGN_1132 |      | transposase in ISPg1                                                       | -2.57717    | 5.00E-05 | 0.00026  |
| PGN_1133 |      | hypothetical protein                                                       | -0.693987   | 0.31285  | 0.430826 |
| PGN_1134 |      | conserved hypothetical protein                                             | -0.00534496 | 0.9879   | 0.990226 |
| PGN_1135 |      | putative glycosyltransferase                                               | 0.566516    | 0.2615   | 0.375157 |
| PGN_1136 |      | probable GTP-cyclohydrolase protein                                        | -0.159494   | 0.56855  | 0.676026 |
| PGN_1137 |      | conserved hypothetical protein                                             | -0.0493206  | 0.85175  | 0.899938 |
| PGN_1138 |      | conserved hypothetical protein                                             | -1.36935    | 5.00E-05 | 0.00026  |
| PGN_1139 |      | conserved hypothetical protein                                             | -0.636878   | 0.0232   | 0.051558 |
| PGN_1140 | pyrE | putative orotate phosphoribosyltransferase                                 | -0.656108   | 0.0243   | 0.05339  |
| PGN_1141 |      | putative amidohydrolase                                                    | -0.920708   | 0.0523   | 0.100584 |
| PGN_1142 |      | probable acetyltransferase                                                 | -0.909057   | 0.0169   | 0.039452 |
| PGN_1143 |      | conserved hypothetical protein                                             | -1.81525    | 5.00E-05 | 0.00026  |
| PGN_1144 |      | hypothetical protein                                                       | 0.132433    | 0.7466   | 0.824601 |
| PGN_1145 |      | conserved hypothetical protein                                             | 0.611671    | 0.2156   | 0.321212 |
| PGN_1146 |      | conserved hypothetical protein                                             | -0.233794   | 0.39455  | 0.511881 |
| PGN_1147 |      | conserved hypothetical protein                                             | -0.798804   | 0.00465  | 0.013306 |
| PGN_1148 |      | phosphoribosylamine-glycine ligase                                         | -1.11859    | 0.01455  | 0.034845 |
| PGN_1149 |      | prolyl tripeptidase A                                                      | -0.944621   | 0.03805  | 0.078043 |
| PGN_1150 |      | putative N6-adenine-specific DNA methylase                                 | -1.27869    | 0.00015  | 0.000685 |
| PGN_1151 |      | 1-deoxy-D-xylulose-5-phosphate reductoisomerase                            | 0.450144    | 0.3354   | 0.454309 |
| PGN_1152 | rimM | probable 16S rRNA processing protein                                       | -0.583138   | 0.14935  | 0.237821 |
| PGN_1153 |      | UDP-N-acetylglucosamine 1-carboxyvinyltransferase                          | -0.543913   | 0.0696   | 0.12785  |
| PGN_1154 |      | conserved hypothetical protein                                             | -0.150954   | 0.5878   | 0.691014 |
| PGN_1155 | pgi  | glucose-6-phosphate isomerase                                              | -0.630361   | 0.0334   | 0.070196 |
| PGN_1156 |      | glycerol-3-phosphate dehydrogenase                                         | -1.01816    | 0.00125  | 0.004224 |
| PGN_1157 | lysS | lysyl-tRNA synthetase                                                      | -0.902505   | 0.00415  | 0.012037 |
| PGN_1158 |      | putative purine nucleoside phosphorylase                                   | -1.17653    | 0.0004   | 0.001607 |
| PGN_1159 |      | conserved hypothetical protein                                             | -0.981792   | 0.00155  | 0.0051   |
| PGN_1160 |      | transposase in ISPg2                                                       | 1.03182     | 0.0008   | 0.002848 |
| PGN_1161 |      | transposase in ISPg1                                                       | -2.28234    | 5.00E-05 | 0.00026  |
| PGN_1162 |      | putative CoA transferase subunit A                                         | -0.00793261 | 0.97655  | 0.984297 |
| PGN_1163 |      | conserved hypothetical protein                                             | 0.0294981   | 0.91445  | 0.944776 |
| PGN_1164 |      | conserved hypothetical protein with prokaryotic DUF849 domain              | 0.373711    | 0.16745  | 0.260791 |
| PGN_1165 |      | conserved hypothetical protein                                             | 0.124981    | 0.66835  | 0.760512 |
| PGN_1166 |      | L-lysine 2,3-aminomutase                                                   | 0.433726    | 0.13165  | 0.21412  |
| PGN_1167 |      | conserved hypothetical protein                                             | 0.80768     | 0.0448   | 0.08889  |
| PGN_1168 |      | probable DNA mismatch repair protein MutS                                  | 0.940104    | 0.02615  | 0.056984 |
| PGN_1169 |      | D-lysine 5,6-aminomutase alpha subunit                                     | 1.14274     | 0.00305  | 0.009172 |
| PGN_1170 |      | D-lysine 5,6-aminomutase beta subunit                                      | 0.0568421   | 0.91235  | 0.943367 |
| PGN_1171 |      | coenzyme A transferase beta subunit                                        | 0.0957522   | 0.72755  | 0.810178 |
| PGN_1172 |      | acyl-CoA dehydrogenase short-chain specific                                | 1.09766     | 0.00045  | 0.001764 |
| PGN_1173 |      | putative electron transfer flavoprotein beta subunit                       | 1.04818     | 0.0003   | 0.00126  |
| PGN_1174 |      | electron transfer flavoprotein alpha subunit                               | 0.187471    | 0.54265  | 0.654562 |
| PGN_1175 |      | putative enoyl-CoA hydratase                                               | 0.0763727   | 0.78355  | 0.852416 |
| PGN_1176 |      | putative 3-hydroxybutyryl-CoA dehydrogenase                                | -0.108169   | 0.6907   | 0.782597 |
| PGN_1177 |      | transposase in ISPg1                                                       | -2.29272    | 5.00E-05 | 0.00026  |
| PGN_1178 |      | acetate kinase                                                             | 0.207355    | 0.4874   | 0.599081 |
| PGN_1179 |      | phosphotransacetylase                                                      | 0.257015    | 0.3841   | 0.502303 |
| PGN_1180 |      | conserved hypothetical protein                                             | -1.02314    | 0.0003   | 0.00126  |
| PGN_1181 |      | probable thiol:disulfide oxidoreductase                                    | -0.296078   | 0.3214   | 0.440322 |
| PGN_1182 |      | conserved hypothetical protein                                             | -2.42501    | 5.00E-05 | 0.00026  |
| PGN_1183 |      | hypothetical protein                                                       | -1.46217    | 0.0005   | 0.001921 |
| PGN_1184 |      | conserved hypothetical protein                                             | -1.26656    | 5.00E-05 | 0.00026  |
| PGN_1185 |      | conserved hypothetical protein                                             | -0.654233   | 0.02085  | 0.047425 |

|          |      |                                                                         |             |          |          |
|----------|------|-------------------------------------------------------------------------|-------------|----------|----------|
| PGN_1186 | rprY | putative DNA-binding response regulator RprY                            | -1.2723     | 0.0005   | 0.001921 |
| PGN_1187 |      | conserved hypothetical protein                                          | -0.355033   | 0.21505  | 0.321212 |
| PGN_1188 |      | conserved hypothetical protein                                          | -0.287907   | 0.2987   | 0.415371 |
| PGN_1189 |      | phosphoglucomutase/phosphomannomutase                                   | 0.201332    | 0.47625  | 0.589498 |
| PGN_1190 |      | RNA methyltransferase                                                   | 0.123127    | 0.66155  | 0.754791 |
| PGN_1191 |      | transposase in ISPg1                                                    | -2.41014    | 5.00E-05 | 0.00026  |
| PGN_1192 |      | DNA-binding protein histone-like family                                 | -3.31914    | 5.00E-05 | 0.00026  |
| PGN_1193 |      | conserved hypothetical protein                                          | -0.063048   | 0.81675  | 0.874239 |
| PGN_1194 |      | alanine racemase                                                        | 0.484548    | 0.077    | 0.138223 |
| PGN_1195 |      | conserved hypothetical protein                                          | 1.34864     | 5.00E-05 | 0.00026  |
| PGN_1196 | murQ | putative sugar phosphate isomerase                                      | -0.342787   | 0.52345  | 0.636451 |
| PGN_1197 |      | conserved hypothetical protein                                          | -0.405549   | 0.45315  | 0.56985  |
| PGN_1198 |      | putative sodium-solute transporter                                      | -0.146229   | 0.74035  | 0.818808 |
| PGN_1199 |      | DNA-binding protein histone-like family                                 | -0.309776   | 0.3912   | 0.509086 |
| PGN_1200 |      | ATPase AAA family                                                       | -0.461145   | 0.0956   | 0.164537 |
| PGN_1201 |      | conserved hypothetical protein                                          | -0.830506   | 0.5079   | 0.621448 |
| PGN_1202 | rpoN | RNA polymerase sigma-54 factor                                          | -0.346076   | 0.44295  | 0.559004 |
| PGN_1203 |      | UDP-N-acetylmuramoylalanyl-D-glutamyl-2, 6-diaminopimelate--D-alanyl-D- | -0.603975   | 0.15705  | 0.248041 |
| PGN_1204 |      | probable aspartate-1-decarboxylase                                      | 0.874423    | 0.0017   | 0.005534 |
| PGN_1205 |      | signal recognition particle protein                                     | 1.12218     | 0.0002   | 0.000895 |
| PGN_1206 |      | putative methylenetetrahydrofolate dehydrogenase/methenyltetrahydrofol  | -1.71837    | 5.00E-05 | 0.00026  |
| PGN_1207 |      | putative transport multidrug efflux protein                             | 0.376389    | 0.22095  | 0.32735  |
| PGN_1208 | clpB | ClpB protein                                                            | -1.01691    | 0.0011   | 0.003753 |
| PGN_1209 |      | probable flavodoxin                                                     | -0.487788   | 0.08885  | 0.155305 |
| PGN_1210 |      | hypothetical protein                                                    | -1.25382    | 5.00E-05 | 0.00026  |
| PGN_1211 |      | hypothetical protein                                                    | -1.02106    | 0.0014   | 0.004672 |
| PGN_1212 |      | hypothetical protein                                                    | -1.02649    | 0.1319   | 0.214363 |
| PGN_1213 |      | putative ATP-binding protein                                            | -0.423676   | 0.16535  | 0.258087 |
| PGN_1214 |      | hypothetical protein                                                    | -0.528863   | 0.0885   | 0.15482  |
| PGN_1215 |      | hypothetical protein                                                    | -0.801169   | 0.0214   | 0.048366 |
| PGN_1216 |      | transposase in ISPg1                                                    | -2.44293    | 5.00E-05 | 0.00026  |
| PGN_1217 |      | hypothetical protein                                                    | 0.386723    | 0.46755  | 0.581433 |
| PGN_1218 | asnC | asparaginyl-tRNA synthetase                                             | 0.80826     | 0.01055  | 0.026644 |
| PGN_1219 |      | ribosomal large subunit pseudouridine synthase B                        | 0.339575    | 0.2787   | 0.39347  |
| PGN_1220 |      | adenylosuccinate lyase                                                  | -0.168721   | 0.59975  | 0.702734 |
| PGN_1221 |      | probable ATP:corrinoid adenosyltransferase                              | -1.58164    | 5.00E-05 | 0.00026  |
| PGN_1222 |      | conserved hypothetical protein                                          | 1.34704     | 0.0002   | 0.000895 |
| PGN_1223 |      | uracil permease                                                         | 1.27057     | 0.0001   | 0.000483 |
| PGN_1224 |      | probable transcriptional regulator                                      | -0.285043   | 0.29695  | 0.413477 |
| PGN_1225 | xseA | probable exodeoxyribonuclease VII large subunit                         | -0.655587   | 0.0243   | 0.05339  |
| PGN_1226 |      | ribonucleotide reductase                                                | -0.965784   | 0.00285  | 0.008718 |
| PGN_1227 |      | TPR domain protein                                                      | -0.457344   | 0.10575  | 0.178684 |
| PGN_1228 |      | hypothetical protein                                                    | -0.797113   | 1        | 1        |
| PGN_1229 | valS | valyl-tRNA synthetase                                                   | 0.55171     | 0.0625   | 0.117226 |
| PGN_1230 |      | conserved hypothetical protein                                          | 0.647743    | 0.03355  | 0.070339 |
| PGN_1231 |      | hypothetical protein                                                    | -0.983764   | 0.00215  | 0.006791 |
| PGN_1232 |      | thioredoxin reductase                                                   | -1.09459    | 0.00225  | 0.007076 |
| PGN_1233 |      | conserved hypothetical protein                                          | 0.667444    | 0.02285  | 0.05094  |
| PGN_1234 |      | conserved hypothetical protein                                          | 1.13395     | 0.0067   | 0.018171 |
| PGN_1235 | porS | membrane protein PorS                                                   | 0.919771    | 0.1176   | 0.195145 |
| PGN_1236 | porR | regulator PorR                                                          | 1.40536     | 0.0118   | 0.02928  |
| PGN_1237 |      | hypothetical protein                                                    | #NAME?      | 0.02135  | 0.048356 |
| PGN_1238 |      | conserved hypothetical protein                                          | 1.34563     | 5.00E-05 | 0.00026  |
| PGN_1239 |      | probable lipopolysaccharide biosynthesis glycosyltransferase            | 1.40712     | 5.00E-05 | 0.00026  |
| PGN_1240 |      | conserved hypothetical protein                                          | 1.7283      | 5.00E-05 | 0.00026  |
| PGN_1241 |      | hypothetical protein                                                    | 1.40267     | 0.0001   | 0.000483 |
| PGN_1242 |      | putative O-antigen polymerase Wzy                                       | 0.375191    | 0.17955  | 0.277605 |
| PGN_1243 |      | UDP-glucose 6-dehydrogenase                                             | -0.116173   | 0.6915   | 0.783087 |
| PGN_1244 |      | putative peptide chain release factor RF-2                              | 1.36878     | 5.00E-05 | 0.00026  |
| PGN_1245 |      | long-chain-fatty-acid-CoA ligase                                        | -0.00532352 | 0.98585  | 0.988636 |
| PGN_1246 |      | hypothetical protein                                                    | -1.76592    | 5.00E-05 | 0.00026  |
| PGN_1247 |      | hypothetical protein                                                    | -0.405996   | 0.2649   | 0.378759 |

|          |                                                                             |            |          |          |
|----------|-----------------------------------------------------------------------------|------------|----------|----------|
| PGN_1248 | hypothetical protein                                                        | 0.493944   | 1        | 1        |
| PGN_1249 | conserved hypothetical protein                                              | 0.716089   | 0.4928   | 0.605058 |
| PGN_1250 | hypothetical protein                                                        | -0.685418  | 1        | 1        |
| PGN_1251 | probable glycosyltransferase                                                | -0.697002  | 0.01365  | 0.0328   |
| PGN_1252 | iron-containing alcohol dehydrogenase                                       | -1.76814   | 5.00E-05 | 0.00026  |
| PGN_1253 | hypothetical protein                                                        | 0.925069   | 0.01085  | 0.027208 |
| PGN_1254 | hypothetical protein                                                        | 1.03842    | 0.00065  | 0.00239  |
| PGN_1255 | putative heptosyltransferase                                                | 1.79554    | 5.00E-05 | 0.00026  |
| PGN_1256 | conserved hypothetical protein                                              | 2.26135    | 0.00035  | 0.001436 |
| PGN_1257 | hypothetical protein                                                        | 0.996694   | 0.22575  | 0.333071 |
| PGN_1258 | cobalamin biosynthesis protein                                              | 0.194885   | 0.4842   | 0.596564 |
| PGN_1259 | probable histidinol-phosphate aminotransferase                              | 0.0646789  | 0.9265   | 0.951988 |
| PGN_1260 | cobyric acid synthase                                                       | -0.563769  | 0.20565  | 0.310077 |
| PGN_1261 | probable cobalamin adenosyltransferase                                      | -0.687516  | 0.1292   | 0.210618 |
| PGN_1262 | cobyric acid a,c-diamide synthase                                           | -0.41257   | 0.15295  | 0.242827 |
| PGN_1263 | conserved hypothetical protein                                              | -0.763731  | 0.02155  | 0.048602 |
| PGN_1264 | conserved hypothetical protein                                              | -0.453407  | 0.53625  | 0.648311 |
| PGN_1265 | hypothetical protein                                                        | 0.78478    | 0.2503   | 0.362408 |
| PGN_1266 | conserved hypothetical protein                                              | 0.232766   | 0.73265  | 0.813915 |
| PGN_1267 | conserved hypothetical protein                                              | -0.0963185 | 0.7254   | 0.808998 |
| PGN_1268 | putative oxidoreductase                                                     | -1.12057   | 0.01645  | 0.038698 |
| PGN_1269 | putative electron transport protein                                         | -0.896135  | 0.0416   | 0.084109 |
| PGN_1270 | conserved hypothetical protein                                              | -0.850567  | 0.00385  | 0.011337 |
| PGN_1271 | probable thioesterase superfamily protein                                   | 0.441839   | 0.11555  | 0.192493 |
| PGN_1272 | putative diaminopimelate decarboxylase                                      | -1.28777   | 0.0001   | 0.000483 |
| PGN_1273 | probable 1,4-dihydroxy-2-naphthoate octaprenyltransferase                   | -1.1777    | 0.1488   | 0.237459 |
| PGN_1274 | conserved hypothetical protein                                              | -1.5073    | 5.00E-05 | 0.00026  |
| PGN_1275 | conserved hypothetical protein                                              | -1.1686    | 0.00015  | 0.000685 |
| PGN_1276 | transposase in ISPg1                                                        | -2.40109   | 5.00E-05 | 0.00026  |
| PGN_1277 | conserved hypothetical protein                                              | -0.15196   | 0.7925   | 0.857878 |
| PGN_1278 | partial transposase in ISPg3                                                | -0.481742  | 0.11065  | 0.185345 |
| PGN_1279 | partial transposase in ISPg3                                                | -1.11291   | 0.1093   | 0.183228 |
| PGN_1280 | partial transposase in ISPg1                                                | -2.37956   | 5.00E-05 | 0.00026  |
| PGN_1286 | probable lysozyme                                                           | -2.23586   | 5.00E-05 | 0.00026  |
| PGN_1287 | conserved hypothetical protein                                              | -1.98999   | 5.00E-05 | 0.00026  |
| PGN_1288 | conserved hypothetical protein                                              | -0.541292  | 0.0829   | 0.147324 |
| PGN_1289 | conserved hypothetical protein                                              | -1.09958   | 0.0104   | 0.026359 |
| PGN_1290 | conserved hypothetical protein                                              | -1.27589   | 0.01185  | 0.02937  |
| PGN_1291 | conserved hypothetical protein related to phage                             | -0.916244  | 0.01725  | 0.040137 |
| PGN_1292 | probable anti-restriction protein                                           | -0.562679  | 0.2854   | 0.400803 |
| PGN_1293 | conserved hypothetical protein                                              | -0.569711  | 0.21545  | 0.321212 |
| PGN_1294 | conserved hypothetical protein                                              | -0.716647  | 0.22635  | 0.333715 |
| PGN_1295 | hypothetical protein                                                        | -0.107552  | 0.8608   | 0.906535 |
| PGN_1296 | putative OmpA family protein                                                | -0.469283  | 0.10675  | 0.179945 |
| PGN_1297 | conserved hypothetical protein                                              | -0.749576  | 0.0115   | 0.028602 |
| PGN_1298 | conserved hypothetical protein                                              | -1.4846    | 0.0001   | 0.000483 |
| PGN_1299 | hypothetical protein                                                        | 0.573827   | 0.78725  | 0.854694 |
| PGN_1300 | probable transcriptional regulator                                          | 0.24629    | 0.3759   | 0.493398 |
| PGN_1301 | probable transcriptional regulator                                          | 0.0498913  | 0.85665  | 0.904376 |
| PGN_1302 | O-antigen ligase waaL                                                       | 1.53608    | 5.00E-05 | 0.00026  |
| PGN_1303 | hypothetical protein                                                        | -0.272439  | 0.3619   | 0.480652 |
| PGN_1304 | conserved hypothetical protein                                              | -0.553566  | 0.0727   | 0.132176 |
| PGN_1305 | putative N-acetylmuramoyl-L-alanine amidase                                 | -0.420183  | 0.1489   | 0.237459 |
| PGN_1306 | hypothetical protein                                                        | 1.53861    | 0.00335  | 0.009989 |
| PGN_1307 | hypothetical protein                                                        | -0.974609  | 0.01675  | 0.039231 |
| PGN_1308 | probable iron dependent repressor                                           | 0.0612356  | 0.83     | 0.885076 |
| PGN_1309 | ferrous iron transport protein B                                            | 0.0943979  | 0.73325  | 0.813915 |
| PGN_1310 | glycogen synthase                                                           | -0.122299  | 0.65745  | 0.751321 |
| PGN_1311 | putative K <sup>+</sup> dependent Na <sup>+</sup> exchanger related-protein | 1.05488    | 0.00015  | 0.000685 |
| PGN_1312 | probable transcriptional regulator                                          | 0.48397    | 0.1198   | 0.198023 |
| PGN_1313 | conserved hypothetical protein                                              | 1.46383    | 5.00E-05 | 0.00026  |
| PGN_1314 | ATP-dependent DNA helicase                                                  | 0.930154   | 0.4336   | 0.549812 |

|          |                                                                        |             |          |          |
|----------|------------------------------------------------------------------------|-------------|----------|----------|
| PGN_1315 | conserved hypothetical protein                                         | 0.192197    | 0.60285  | 0.705377 |
| PGN_1316 | uvrAI excinuclease ABC A subunit                                       | -0.609826   | 0.0738   | 0.133833 |
| PGN_1317 | conserved hypothetical protein                                         | 0.859205    | 0.0494   | 0.096312 |
| PGN_1318 | putative ABC transporter ATP-binding protein                           | 0.559688    | 0.1933   | 0.294796 |
| PGN_1319 | transposase in ISPg1                                                   | -2.46789    | 5.00E-05 | 0.00026  |
| PGN_1320 | conserved hypothetical protein                                         | 0.93914     | 0.00145  | 0.004794 |
| PGN_1321 | conserved hypothetical protein                                         | -2.15763    | 5.00E-05 | 0.00026  |
| PGN_1322 | conserved hypothetical protein                                         | -1.19238    | 0.03855  | 0.078992 |
| PGN_1323 | TPR domain protein                                                     | 0.962577    | 0.0023   | 0.007212 |
| PGN_1324 | probable ABC transporter membrane protein                              | -0.662526   | 0.08155  | 0.14541  |
| PGN_1325 | probable ABC transporter membrane protein                              | -0.696485   | 0.08315  | 0.147611 |
| PGN_1326 | hypothetical protein                                                   | -0.455056   | 0.0964   | 0.165465 |
| PGN_1327 | hypothetical protein                                                   | -0.0290693  | 0.9469   | 0.96089  |
| PGN_1328 | hypothetical protein                                                   | -0.426351   | 0.3109   | 0.428696 |
| PGN_1329 | hypothetical protein                                                   | -0.911553   | 0.44675  | 0.563132 |
| PGN_1330 | probable branched chain amino acid ABC transporter ATP-binding protein | -0.771352   | 0.00735  | 0.019634 |
| PGN_1331 | conserved hypothetical protein                                         | -0.562685   | 0.34515  | 0.463904 |
| PGN_1332 | putative para-aminobenzoate synthase component I                       | 0.419982    | 0.14395  | 0.231123 |
| PGN_1333 | probable para-aminobenzoate synthase component I                       | 1.47372     | 0.0006   | 0.002241 |
| PGN_1334 | conserved hypothetical protein                                         | 1.30022     | 0.0003   | 0.00126  |
| PGN_1335 | conserved hypothetical protein                                         | 1.79035     | 5.00E-05 | 0.00026  |
| PGN_1336 | conserved hypothetical protein                                         | 1.18168     | 5.00E-05 | 0.00026  |
| PGN_1337 | conserved hypothetical protein                                         | 0.00291521  | 0.98255  | 0.987187 |
| PGN_1338 | pyruvate phosphate dikinase                                            | -0.030916   | 0.92815  | 0.952922 |
| PGN_1339 | conserved hypothetical protein                                         | -0.284601   | 0.34955  | 0.46834  |
| PGN_1340 | conserved hypothetical protein                                         | -0.724643   | 0.01495  | 0.035682 |
| PGN_1341 | putative CoA transferase                                               | 0.0241309   | 0.93585  | 0.956517 |
| PGN_1342 | putative SAM/TRAM family methylase protein                             | 0.866047    | 0.0028   | 0.00859  |
| PGN_1343 | probable ABC transporter ATP-binding protein                           | -0.234101   | 0.40395  | 0.520272 |
| PGN_1344 | conserved hypothetical protein                                         | -0.29638    | 0.48005  | 0.593167 |
| PGN_1345 | conserved hypothetical protein                                         | 0.25062     | 0.57385  | 0.680628 |
| PGN_1346 | putative transcriptional regulator                                     | 0.040062    | 0.9548   | 0.967064 |
| PGN_1347 | putative TonB-dependent receptor exported protein                      | -1.10625    | 0.00035  | 0.001436 |
| PGN_1348 | conserved hypothetical protein                                         | -0.26881    | 0.3708   | 0.488511 |
| PGN_1349 | probable dipeptidyl aminopeptidase                                     | 0.687718    | 0.0168   | 0.039305 |
| PGN_1350 | conserved hypothetical protein                                         | -0.158988   | 0.5642   | 0.672416 |
| PGN_1351 | conserved hypothetical protein                                         | 0.0264585   | 0.93455  | 0.956208 |
| PGN_1352 | conserved hypothetical protein with DUF1706 domain                     | 0.0955543   | 0.7498   | 0.826683 |
| PGN_1353 | conserved hypothetical protein                                         | -0.322544   | 0.291    | 0.407056 |
| PGN_1354 | conserved hypothetical protein                                         | 0.563146    | 0.10795  | 0.181393 |
| PGN_1355 | conserved hypothetical protein                                         | 0.450773    | 0.7012   | 0.791545 |
| PGN_1356 | conserved hypothetical protein                                         | 0.966242    | 0.1491   | 0.2376   |
| PGN_1357 | conserved hypothetical protein                                         | 1.28156     | 5.00E-05 | 0.00026  |
| PGN_1358 | conserved hypothetical protein                                         | -1.07666    | 0.00045  | 0.001764 |
| PGN_1359 | putative erythronate-4-phosphate dehydrogenase                         | -0.623961   | 0.03175  | 0.067731 |
| PGN_1360 | probable oxidoreductase                                                | 0.237957    | 0.38545  | 0.50345  |
| PGN_1361 | conserved hypothetical protein                                         | -0.105243   | 0.71035  | 0.797225 |
| PGN_1362 | probable exported transglycosylase protein                             | -0.00640405 | 0.9811   | 0.986195 |
| PGN_1363 | ABC transporter ATP-binding protein                                    | -0.168408   | 0.5548   | 0.664698 |
| PGN_1364 | probable peptidyl-prolyl cis-trans isomerase cyclophilin-type          | -0.107477   | 0.7077   | 0.795929 |
| PGN_1365 | conserved hypothetical protein                                         | 0.383497    | 0.35415  | 0.473015 |
| PGN_1366 | conserved hypothetical protein                                         | -1.6502     | 5.00E-05 | 0.00026  |
| PGN_1367 | NAD-specific glutamate dehydrogenase                                   | 0.207538    | 0.548    | 0.658776 |
| PGN_1368 | conserved hypothetical protein                                         | 0.508717    | 0.3905   | 0.508616 |
| PGN_1369 | conserved hypothetical protein                                         | 0.469309    | 0.2672   | 0.381279 |
| PGN_1370 | NAD-dependent nucleotide-diphosphate-sugar epimerase                   | 0.730421    | 0.01255  | 0.030641 |
| PGN_1371 | hypothetical protein                                                   | 0.225464    | 0.69365  | 0.784687 |
| PGN_1372 | conserved hypothetical protein                                         | -0.0417184  | 0.9082   | 0.939989 |
| PGN_1373 | probable transcriptional regulator                                     | 0.121298    | 0.8177   | 0.874816 |
| PGN_1374 | putative ribosomal large subunit pseudouridine synthase D              | -0.821199   | 0.0063   | 0.01724  |
| PGN_1375 | putative beta-ketoacyl-acyl carrier protein reductase                  | -0.877599   | 0.008    | 0.021184 |
| PGN_1376 | putative transcriptional regulator                                     | -1.13813    | 0.0004   | 0.001607 |

|          |                                                                             |           |          |          |
|----------|-----------------------------------------------------------------------------|-----------|----------|----------|
| PGN_1377 | GTP-binding protein LepA                                                    | 0.307992  | 0.30115  | 0.417686 |
| PGN_1378 | replicative DNA helicase                                                    | 0.346444  | 0.2251   | 0.332721 |
| PGN_1379 | hypothetical protein                                                        | 0.0297992 | 0.91745  | 0.946343 |
| PGN_1380 | hypothetical protein                                                        | -0.45868  | 0.15355  | 0.243598 |
| PGN_1381 | alaS<br>alanyl-tRNA synthetase                                              | 0.470273  | 0.11685  | 0.194354 |
| PGN_1382 | putative 3-dehydroquinase synthase                                          | 0.633679  | 0.0318   | 0.06777  |
| PGN_1383 | conserved hypothetical protein                                              | -0.174959 | 0.5242   | 0.636999 |
| PGN_1384 | probable 1-acyl-sn-glycerol-3-phosphate acetyltransferase                   | -0.93998  | 0.001    | 0.003462 |
| PGN_1385 | hypothetical protein                                                        | -0.588811 | 0.043    | 0.086503 |
| PGN_1386 | conserved hypothetical protein                                              | 1.24382   | 0.0057   | 0.015781 |
| PGN_1387 | putative ABC transporter permease protein                                   | 1.86098   | 5.00E-05 | 0.00026  |
| PGN_1388 | DNA ligase                                                                  | 1.9553    | 5.00E-05 | 0.00026  |
| PGN_1389 | probable acetyltransferase                                                  | 1.85627   | 0.0049   | 0.013873 |
| PGN_1390 | recR<br>putative recombination protein RecR                                 | 1.67891   | 0.1956   | 0.297877 |
| PGN_1391 | putative ribonuclease E                                                     | 1.55414   | 5.00E-05 | 0.00026  |
| PGN_1392 | conserved hypothetical protein                                              | 1.08116   | 0.00025  | 0.00108  |
| PGN_1393 | putative DNA-binding protein HU                                             | 1.18029   | 0.00015  | 0.000685 |
| PGN_1394 | transposase in ISPg2                                                        | 1.23203   | 5.00E-05 | 0.00026  |
| PGN_1395 | putative anaerobic ribonucleoside-triphosphate reductase activating protein | 0.203391  | 0.47875  | 0.592248 |
| PGN_1396 | anaerobic ribonucleoside-triphosphate reductase                             | -1.29045  | 0.0017   | 0.005534 |
| PGN_1397 | transposase in ISPg1                                                        | -2.41622  | 5.00E-05 | 0.00026  |
| PGN_1398 | conserved hypothetical protein                                              | 0.762262  | 0.0118   | 0.02928  |
| PGN_1399 | conserved hypothetical protein                                              | -1.27266  | 5.00E-05 | 0.00026  |
| PGN_1400 | conserved hypothetical protein                                              | 0.288638  | 0.29715  | 0.413485 |
| PGN_1401 | delta-1-pyrroline-5-carboxylate dehydrogenase                               | -0.960049 | 0.00245  | 0.007615 |
| PGN_1402 | putative amidinotransferase                                                 | -1.15718  | 0.00045  | 0.001764 |
| PGN_1403 | ornithine aminotransferase                                                  | -1.12876  | 0.00095  | 0.003316 |
| PGN_1404 | conserved hypothetical protein                                              | 0.646887  | 0.66755  | 0.760512 |
| PGN_1405 | elongation factor P                                                         | 1.19663   | 5.00E-05 | 0.00026  |
| PGN_1406 | hypothetical protein                                                        | -0.555077 | 0.12635  | 0.206922 |
| PGN_1407 | DNA-binding protein histone-like family                                     | -0.533436 | 0.0541   | 0.103299 |
| PGN_1408 | conserved hypothetical protein with predicted permease membrane region      | -1.23093  | 5.00E-05 | 0.00026  |
| PGN_1409 | putative peptidase                                                          | -0.958726 | 0.01105  | 0.027677 |
| PGN_1410 | conserved hypothetical protein                                              | -1.01041  | 0.69655  | 0.787549 |
| PGN_1411 | putative N-ethylmethylamine chlorohydrolase                                 | -0.848164 | 0.21185  | 0.31785  |
| PGN_1412 | putative purine nucleoside phosphorylase I                                  | -0.727017 | 0.0121   | 0.029781 |
| PGN_1413 | conserved hypothetical protein                                              | 0.490452  | 0.0743   | 0.134511 |
| PGN_1414 | hypothetical protein                                                        | -1.09297  | 0.08155  | 0.14541  |
| PGN_1415 | DNA-binding protein histone-like family                                     | 0.207119  | 0.45665  | 0.572561 |
| PGN_1416 | probable lysyl endopeptidase precursor                                      | -0.597378 | 0.0484   | 0.094535 |
| PGN_1417 | hypothetical protein                                                        | 1.13295   | 0.01755  | 0.04079  |
| PGN_1418 | pyruvate-flavodoxin oxidoreductase                                          | -0.885569 | 0.0527   | 0.101262 |
| PGN_1419 | conserved hypothetical protein                                              | -0.868834 | 0.0325   | 0.069054 |
| PGN_1420 | transposase in ISPg1                                                        | -2.38809  | 5.00E-05 | 0.00026  |
| PGN_1421 | hypothetical protein                                                        | -0.762297 | 0.18415  | 0.283277 |
| PGN_1422 | putative partial DNA-binding protein histone-like family                    | -1.26209  | 0.0001   | 0.000483 |
| PGN_1423 | putative partial DNA-binding protein histone-like family                    | -1.1603   | 0.0001   | 0.000483 |
| PGN_1424 | putative partial Type II restriction enzyme                                 | -1.50595  | 5.00E-05 | 0.00026  |
| PGN_1425 | putative partial Type II restriction enzyme                                 | -1.32912  | 5.00E-05 | 0.00026  |
| PGN_1426 | adenine-specific methyltransferase                                          | -0.702562 | 0.013    | 0.031487 |
| PGN_1427 | hypothetical protein                                                        | 0.537941  | 0.2937   | 0.410024 |
| PGN_1428 | transposase in ISPg3                                                        | -0.490984 | 0.09555  | 0.164537 |
| PGN_1429 | conserved hypothetical protein                                              | -0.191265 | 0.84825  | 0.898023 |
| PGN_1430 | putative transmembrane Acr-type transport protein                           | -0.269569 | 0.42575  | 0.543093 |
| PGN_1431 | putative cation efflux system protein                                       | -0.193859 | 0.78515  | 0.853339 |
| PGN_1432 | probable outer membrane efflux protein                                      | -0.515461 | 0.06     | 0.113446 |
| PGN_1433 | transposase in ISPg1                                                        | -2.4003   | 5.00E-05 | 0.00026  |
| PGN_1434 | aminoacyl-histidine dipeptidase                                             | -1.76132  | 5.00E-05 | 0.00026  |
| PGN_1435 | hypothetical protein                                                        | -0.577716 | 0.04795  | 0.093829 |
| PGN_1436 | conserved hypothetical protein                                              | 0.079909  | 0.77625  | 0.846637 |
| PGN_1437 | conserved hypothetical protein                                              | -0.411201 | 0.1708   | 0.26562  |
| PGN_1438 | hypothetical protein                                                        | 0.673408  | 0.227    | 0.334221 |



|          |        |                                                                     |            |          |          |
|----------|--------|---------------------------------------------------------------------|------------|----------|----------|
| PGN_1439 |        | hypothetical protein                                                | 0.655265   | 0.1341   | 0.217602 |
| PGN_1440 |        | putative vancomycin B-type resistance protein VanW                  | 0.597133   | 0.03875  | 0.079326 |
| PGN_1441 | nadE   | glutamine-dependent NAD synthetase                                  | -0.0193567 | 0.94455  | 0.960233 |
| PGN_1442 |        | transposase in ISPg1                                                | -2.37718   | 5.00E-05 | 0.00026  |
| PGN_1443 |        | carbamoyl-phosphate synthase large subunit                          | 0.224462   | 0.44395  | 0.559935 |
| PGN_1444 |        | carbamoyl-phosphate synthase small subunit                          | 0.0221818  | 0.9351   | 0.956209 |
| PGN_1445 |        | putative amidophosphoribosyltransferase                             | 0.135581   | 0.6363   | 0.735841 |
| PGN_1446 |        | conserved hypothetical protein                                      | 0.777931   | 0.0092   | 0.023684 |
| PGN_1447 | pyrG   | CTP synthase                                                        | 0.218583   | 0.4582   | 0.573255 |
| PGN_1448 |        | conserved hypothetical protein                                      | -1.14246   | 0.044    | 0.087712 |
| PGN_1449 |        | inosine-5'-monophosphate dehydrogenase                              | -0.239548  | 0.4584   | 0.573255 |
| PGN_1450 | miaA_1 | putative tRNA isopentenyltransferase                                | 0.172705   | 0.81655  | 0.874239 |
| PGN_1451 | groES  | chaperonin GroES                                                    | -0.450675  | 0.1216   | 0.200222 |
| PGN_1452 | groEL  | chaperonin GroEL                                                    | -0.590971  | 0.08435  | 0.149154 |
| PGN_1453 |        | conserved hypothetical protein                                      | 2.30759    | 0.53505  | 0.647228 |
| PGN_1454 |        | probable abortive infection protein                                 | -0.181644  | 0.77255  | 0.844332 |
| PGN_1455 |        | conserved hypothetical protein                                      | 0.0145512  | 0.9663   | 0.975464 |
| PGN_1456 |        | conserved hypothetical protein                                      | -0.131961  | 0.83505  | 0.886411 |
| PGN_1457 |        | probable alkaline phosphatase                                       | 0.113446   | 0.73965  | 0.818459 |
| PGN_1458 | secA   | preprotein translocase SecA subunit                                 | 0.69624    | 0.02285  | 0.05094  |
| PGN_1459 |        | conserved hypothetical protein                                      | -0.163432  | 0.5719   | 0.678693 |
| PGN_1460 | gmk    | putative guanylate kinase                                           | 0.343935   | 0.26875  | 0.38312  |
| PGN_1461 |        | putative spore maturation protein A/B                               | 0.273932   | 0.35005  | 0.468715 |
| PGN_1462 |        | conserved hypothetical protein                                      | -0.331127  | 0.27265  | 0.387716 |
| PGN_1463 |        | probable UbiA prenyltransferase                                     | 1.26198    | 0.0044   | 0.012728 |
| PGN_1464 |        | probable HAD-superfamily subfamily IB hydrolase                     | 0.784734   | 0.07075  | 0.129182 |
| PGN_1465 |        | hypothetical protein                                                | 0.419552   | 0.3238   | 0.442755 |
| PGN_1466 | rgpB   | arginine-specific cysteine proteinase RgpB                          | 1.02398    | 0.00275  | 0.008448 |
| PGN_1467 |        | conserved hypothetical protein                                      | 1.27961    | 5.00E-05 | 0.00026  |
| PGN_1468 |        | putative lipoic acid synthase                                       | 1.17737    | 5.00E-05 | 0.00026  |
| PGN_1469 | dpp    | dipeptidyl peptidase IV                                             | 1.74434    | 5.00E-05 | 0.00026  |
| PGN_1470 | smpB   | putative SsrA-binding protein                                       | 1.56178    | 5.00E-05 | 0.00026  |
| PGN_1471 |        | conserved hypothetical protein                                      | 1.41634    | 5.00E-05 | 0.00026  |
| PGN_1472 |        | queuine tRNA-ribosyltransferase                                     | 1.18397    | 0.0003   | 0.00126  |
| PGN_1473 |        | hypothetical protein                                                | 1.15133    | 0.02235  | 0.050035 |
| PGN_1474 |        | putative autoinducer-2 production protein LuxS                      | 1.14966    | 0.0007   | 0.002543 |
| PGN_1475 |        | probable 5'-methylthioadenosine/S-adenosylhomocysteine nucleosidase | 1.02153    | 0.0006   | 0.002241 |
| PGN_1476 |        | conserved hypothetical protein                                      | 2.46329    | 5.00E-05 | 0.00026  |
| PGN_1477 |        | conserved hypothetical protein                                      | -0.753369  | 0.13435  | 0.21768  |
| PGN_1478 |        | conserved hypothetical protein                                      | 0.22517    | 0.7206   | 0.804909 |
| PGN_1479 |        | dipeptidyl peptidase 7                                              | 0.179363   | 0.5587   | 0.668362 |
| PGN_1480 |        | conserved hypothetical protein with DUF389 domain                   | 0.159653   | 0.5862   | 0.690276 |
| PGN_1481 |        | putative polysaccharide biosynthesis protein                        | -0.058917  | 0.8319   | 0.885647 |
| PGN_1482 | ruvB   | holliday junction DNA helicase RuvB                                 | -0.553498  | 0.05045  | 0.097911 |
| PGN_1483 |        | conserved hypothetical protein                                      | 1.20528    | 0.0337   | 0.070479 |
| PGN_1484 |        | putative methylated-DNA-protein-cysteine methyltransferase          | -1.17861   | 5.00E-05 | 0.00026  |
| PGN_1485 |        | conserved hypothetical protein                                      | -0.54683   | 0.0638   | 0.119149 |
| PGN_1486 |        | conserved hypothetical protein                                      | 0.910846   | 0.0024   | 0.007481 |
| PGN_1487 |        | probable dephospho-CoA kinase                                       | 0.474932   | 0.09505  | 0.163988 |
| PGN_1488 |        | conserved hypothetical protein                                      | 0.980101   | 0.00075  | 0.002697 |
| PGN_1489 |        | 2-amino-3-ketobutyrate CoA ligase                                   | 0.70125    | 0.01655  | 0.038891 |
| PGN_1490 |        | probable precorrin-2 C20-methyltransferase                          | -0.115221  | 0.72465  | 0.808585 |
| PGN_1491 |        | conserved hypothetical protein                                      | -0.593596  | 0.04585  | 0.09072  |
| PGN_1492 | panC   | putative pantoate-beta-alanine ligase                               | 0.141927   | 0.74675  | 0.824601 |
| PGN_1493 |        | conserved hypothetical protein                                      | 0.295409   | 0.4864   | 0.598581 |
| PGN_1494 |        | putative oxygen-independent coproporphyrinogen III oxidase          | 0.985766   | 0.2856   | 0.400819 |
| PGN_1495 |        | putative low-specificity L-threonine aldolase                       | 1.69395    | 5.00E-05 | 0.00026  |
| PGN_1496 |        | hypothetical protein                                                | 0.723361   | 0.0128   | 0.031144 |
| PGN_1497 |        | putative iron-sulfur cluster binding protein                        | -0.626548  | 0.0281   | 0.060736 |
| PGN_1498 |        | conserved hypothetical protein                                      | -1.11998   | 0.00055  | 0.002076 |
| PGN_1499 |        | conserved hypothetical protein                                      | 0.0971892  | 0.92185  | 0.949454 |
| PGN_1500 |        | conserved hypothetical protein                                      | -1.24181   | 5.00E-05 | 0.00026  |

|          |       |                                                           |           |          |          |
|----------|-------|-----------------------------------------------------------|-----------|----------|----------|
| PGN_1501 |       | putative mannose-6-phosphate isomerase                    | -1.44102  | 5.00E-05 | 0.00026  |
| PGN_1502 |       | conserved hypothetical protein                            | -0.711031 | 0.01275  | 0.031058 |
| PGN_1503 |       | probable ferric uptake transcriptional regulator          | 0.17412   | 0.52895  | 0.642038 |
| PGN_1504 |       | adenylosuccinate synthetase                               | 0.882004  | 0.02025  | 0.046357 |
| PGN_1505 |       | putative folylpolyglutamate synthase                      | 0.980018  | 0.0336   | 0.070339 |
| PGN_1506 |       | putative transporter                                      | 1.92454   | 5.00E-05 | 0.00026  |
| PGN_1507 |       | hypothetical protein                                      | -1.80501  | 5.00E-05 | 0.00026  |
| PGN_1508 |       | hypothetical protein                                      | 0.346356  | 0.53285  | 0.64597  |
| PGN_1509 |       | conserved hypothetical protein                            | -1.62392  | 5.00E-05 | 0.00026  |
| PGN_1510 |       | putative peptidyl-prolyl cis-trans isomerase              | 0.647778  | 0.0392   | 0.07994  |
| PGN_1511 |       | probable hemolysin                                        | 1.00032   | 0.0064   | 0.017424 |
| PGN_1512 |       | conserved hypothetical protein                            | 0.733359  | 0.11995  | 0.198118 |
| PGN_1513 |       | conserved hypothetical protein                            | 0.331162  | 0.26985  | 0.384288 |
| PGN_1514 |       | conserved hypothetical protein                            | 0.710688  | 0.0178   | 0.041326 |
| PGN_1515 |       | conserved hypothetical protein                            | 0.496687  | 0.7926   | 0.857878 |
| PGN_1516 |       | probable molybdopterin biosynthesis MoeB protein          | 0.0569843 | 0.85105  | 0.899938 |
| PGN_1517 | pepT  | peptidase T                                               | 0.126619  | 0.65555  | 0.749955 |
| PGN_1518 |       | putative oligopeptide transporter                         | -0.153881 | 0.59115  | 0.69392  |
| PGN_1519 |       | hemagglutinin-related protein                             | 0.202457  | 0.48295  | 0.595713 |
| PGN_1520 |       | conserved hypothetical protein                            | -2.07897  | 5.00E-05 | 0.00026  |
| PGN_1521 |       | conserved hypothetical protein                            | -1.75603  | 0.00015  | 0.000685 |
| PGN_1522 |       | conserved hypothetical protein                            | -1.77278  | 5.00E-05 | 0.00026  |
| PGN_1523 |       | putative polysaccharide export outer membrane protein     | -0.036374 | 0.89765  | 0.934979 |
| PGN_1524 |       | conserved hypothetical protein                            | 0.220642  | 0.4557   | 0.572043 |
| PGN_1525 |       | probable capsular polysaccharide biosynthesis protein     | 0.314993  | 0.2504   | 0.362408 |
| PGN_1526 |       | conserved hypothetical protein                            | -0.556887 | 0.09725  | 0.166569 |
| PGN_1527 |       | conserved hypothetical protein                            | -0.201009 | 0.5214   | 0.635046 |
| PGN_1528 |       | conserved hypothetical protein                            | 0.0370036 | 0.9091   | 0.940464 |
| PGN_1529 |       | putative oxidoreductase                                   | 1.63212   | 5.00E-05 | 0.00026  |
| PGN_1530 |       | putative 2-oxoglutarate ferredoxin oxidoreductase subunit | 1.58551   | 5.00E-05 | 0.00026  |
| PGN_1531 |       | hypothetical protein                                      | 0.293958  | 0.83745  | 0.888356 |
| PGN_1532 |       | conserved hypothetical protein                            | -1.01776  | 0.1632   | 0.255668 |
| PGN_1533 |       | putative carbonic anhydrase                               | -1.20634  | 0.00015  | 0.000685 |
| PGN_1534 |       | hypothetical protein                                      | 1.00297   | 0.00095  | 0.003316 |
| PGN_1535 |       | hypothetical protein                                      | 0.873646  | 0.00255  | 0.007891 |
| PGN_1536 |       | hypothetical protein                                      | -1.70974  | 5.00E-05 | 0.00026  |
| PGN_1537 |       | probable cation efflux system protein                     | -1.90092  | 5.00E-05 | 0.00026  |
| PGN_1538 |       | putative cation efflux system                             | -1.4241   | 0.0001   | 0.000483 |
| PGN_1539 |       | putative ABC transport system exported protein            | -1.30427  | 0.04795  | 0.093829 |
| PGN_1540 |       | putative ABC transport membrane protein                   | -1.02012  | 0.0005   | 0.001921 |
| PGN_1541 |       | hypothetical protein                                      | 0.585734  | 0.8404   | 0.890598 |
| PGN_1542 |       | putative esterase                                         | -0.721058 | 0.01085  | 0.027208 |
| PGN_1543 |       | conserved hypothetical protein                            | -1.2282   | 0.0535   | 0.102429 |
| PGN_1544 |       | conserved hypothetical protein                            | -1.56239  | 5.00E-05 | 0.00026  |
| PGN_1545 |       | hypothetical protein                                      | -1.32024  | 0.02145  | 0.048427 |
| PGN_1546 |       | hypothetical protein                                      | -2.73209  | 5.00E-05 | 0.00026  |
| PGN_1547 | rplA  | conserved hypothetical protein                            | 0.955061  | 0.00405  | 0.011763 |
| PGN_1547 |       | conserved hypothetical protein                            | -2.67883  | 5.00E-05 | 0.00026  |
| PGN_1548 |       | putative ATP-dependent Clp protease proteolytic subunit   | -0.722661 | 0.01215  | 0.02987  |
| PGN_1549 | clpP  | ATP-dependent Clp protease ATP-binding subunit ClpX       | 0.179623  | 0.541    | 0.652942 |
| PGN_1550 | clpX  | ATP-dependent DNA helicase RecQ                           | 0.30331   | 0.3138   | 0.431855 |
| PGN_1551 | recQI | putative peptidyl-prolyl cis-trans isomerase              | 0.427222  | 0.1624   | 0.25479  |
| PGN_1552 |       | conserved hypothetical protein                            | 0.607362  | 0.0424   | 0.085564 |
| PGN_1553 |       | conserved hypothetical protein                            | 0.0212798 | 0.96205  | 0.972557 |
| PGN_1554 |       | DNA mismatch repair protein MutL                          | -0.245274 | 0.80595  | 0.867915 |
| PGN_1555 |       | putative hemagglutinin                                    | -0.704255 | 0.13355  | 0.216879 |
| PGN_1556 |       | conserved hypothetical protein                            | -2.03039  | 5.00E-05 | 0.00026  |
| PGN_1557 |       | conserved hypothetical protein                            | -1.69317  | 5.00E-05 | 0.00026  |
| PGN_1558 |       | hypothetical protein                                      | -1.63713  | 5.00E-05 | 0.00026  |
| PGN_1559 |       | conserved hypothetical protein                            | 0.35749   | 0.39505  | 0.512035 |
| PGN_1560 |       | conserved hypothetical protein                            | 0.228731  | 0.70405  | 0.792661 |
| PGN_1561 |       | conserved hypothetical protein                            | -1.85606  | 5.00E-05 | 0.00026  |

|          |      |                                                                      |            |          |          |
|----------|------|----------------------------------------------------------------------|------------|----------|----------|
| PGN_1562 |      | hypothetical protein                                                 | -1.71235   | 5.00E-05 | 0.00026  |
| PGN_1563 |      | conserved hypothetical protein                                       | -1.36407   | 5.00E-05 | 0.00026  |
| PGN_1564 |      | conserved hypothetical protein with PSP1 C-terminal conserved region | -1.10866   | 0.00095  | 0.003316 |
| PGN_1565 |      | conserved hypothetical protein                                       | -1.09883   | 0.00055  | 0.002076 |
| PGN_1566 |      | putative DNA replication and repair protein RecF                     | -1.03605   | 0.06115  | 0.115313 |
| PGN_1567 |      | conserved hypothetical protein                                       | -1.29884   | 0.00065  | 0.00239  |
| PGN_1568 |      | probable transcriptional regulator Crp/Fnr family                    | -2.03969   | 5.00E-05 | 0.00026  |
| PGN_1569 |      | DNA-directed RNA polymerase beta' subunit                            | -0.634322  | 0.02325  | 0.051562 |
| PGN_1570 | rpoC | DNA-directed RNA polymerase beta subunit                             | 1.21295    | 0.0003   | 0.00126  |
| PGN_1571 | rpoB | putative 50S ribosomal protein L7/L12                                | 1.09115    | 0.0007   | 0.002543 |
| PGN_1572 | rplL | putative 50S ribosomal protein L10                                   | 0.161693   | 0.60825  | 0.710348 |
| PGN_1573 | rplJ | 50S ribosomal protein L1                                             | 0.80993    | 0.00855  | 0.02228  |
| PGN_1575 | rplK | 50S ribosomal protein L11                                            | 1.03436    | 0.00185  | 0.00595  |
| PGN_1576 |      | putative transcription antitermination protein                       | 1.09791    | 0.00165  | 0.005388 |
| PGN_1577 |      | putative preprotein translocase SecE subunit                         | 1.21874    | 0.00015  | 0.000685 |
| PGN_1578 |      | translation elongation factor Tu                                     | 0.36811    | 0.32865  | 0.447949 |
| PGN_1579 |      | putative site-specific recombinase                                   | -1.82197   | 5.00E-05 | 0.00026  |
| PGN_1580 | rpsU | putative 30S ribosomal protein S21                                   | 1.37647    | 5.00E-05 | 0.00026  |
| PGN_1581 |      | DNA mismatch repair protein MutS                                     | 0.486839   | 0.0986   | 0.168475 |
| PGN_1582 |      | membrane-associated zinc metalloprotease                             | -0.26024   | 0.37165  | 0.489025 |
| PGN_1583 |      | hypothetical protein                                                 | -0.73381   | 0.18025  | 0.278283 |
| PGN_1584 |      | putative sodium/hydrogen antiporter                                  | 0.45692    | 0.37565  | 0.493374 |
| PGN_1585 | uvrB | excinuclease ABC B subunit                                           | -1.15561   | 0.00685  | 0.018484 |
| PGN_1586 |      | hypothetical protein                                                 | 0.159172   | 0.7932   | 0.858091 |
| PGN_1587 | tsf  | putative translation elongation factor Ts                            | 2.36353    | 5.00E-05 | 0.00026  |
| PGN_1588 | rpsB | putative 30S ribosomal protein S2                                    | 1.85811    | 5.00E-05 | 0.00026  |
| PGN_1589 | rpsI | putative 30S ribosomal protein S9                                    | 1.72397    | 5.00E-05 | 0.00026  |
| PGN_1590 | rplM | putative 50S ribosomal protein L13                                   | 2.10712    | 5.00E-05 | 0.00026  |
| PGN_1591 |      | conserved hypothetical protein                                       | 0.0206286  | 0.9375   | 0.956825 |
| PGN_1592 |      | conserved hypothetical protein                                       | -1.13181   | 0.42385  | 0.540993 |
| PGN_1593 | coaD | putative phosphopantetheine adenylyltransferase                      | 1.06411    | 0.00085  | 0.003021 |
| PGN_1594 |      | DNA topoisomerase IV B subunit                                       | 0.746084   | 0.0089   | 0.023023 |
| PGN_1595 |      | conserved hypothetical protein                                       | -0.909798  | 0.00185  | 0.00595  |
| PGN_1596 |      | probable 3'-5' exonuclease                                           | -0.328593  | 0.537    | 0.64885  |
| PGN_1597 |      | conserved hypothetical protein                                       | -0.261694  | 0.4416   | 0.558294 |
| PGN_1598 |      | probable glutamine ABC transporter                                   | -0.610561  | 0.03515  | 0.072867 |
| PGN_1599 |      | conserved hypothetical protein                                       | 0.286604   | 0.5444   | 0.65593  |
| PGN_1600 |      | conserved hypothetical protein                                       | -0.404568  | 0.2997   | 0.416489 |
| PGN_1601 |      | conserved hypothetical protein with lemA family domain               | -0.228101  | 0.42705  | 0.543767 |
| PGN_1602 |      | putative flavodoxin                                                  | -0.586243  | 0.0336   | 0.070339 |
| PGN_1603 |      | aspartate carbamoyltransferase regulatory subunit                    | -0.250941  | 0.3569   | 0.475494 |
| PGN_1604 | pyrB | aspartate carbamoyltransferase catalytic subunit                     | -0.0807751 | 0.7703   | 0.842469 |
| PGN_1605 |      | conserved hypothetical protein                                       | -0.487546  | 0.08685  | 0.152687 |
| PGN_1606 |      | conserved hypothetical protein                                       | -0.633105  | 0.03105  | 0.066505 |
| PGN_1607 |      | hypothetical protein                                                 | -1.05032   | 0.073    | 0.132608 |
| PGN_1608 |      | neuraminidase                                                        | -0.342534  | 0.21355  | 0.3195   |
| PGN_1609 |      | hypothetical protein                                                 | -0.467896  | 0.60405  | 0.706218 |
| PGN_1610 |      | conserved hypothetical protein                                       | -0.386187  | 0.1954   | 0.297786 |
| PGN_1611 | inlJ | conserved hypothetical protein                                       | 0.0975961  | 0.7339   | 0.814212 |
| PGN_1612 |      | probable beta-phosphoglucomutase                                     | -0.775225  | 0.00635  | 0.01731  |
| PGN_1613 |      | ATP-dependent DNA helicase RecG                                      | -0.839597  | 0.0032   | 0.009595 |
| PGN_1614 |      | UDP-glucose 4-epimerase                                              | -1.55126   | 5.00E-05 | 0.00026  |
| PGN_1615 | engB | putative GTP-binding protein                                         | -1.69781   | 5.00E-05 | 0.00026  |
| PGN_1616 |      | conserved hypothetical protein                                       | -1.47649   | 5.00E-05 | 0.00026  |
| PGN_1617 |      | probable metallophosphoesterase                                      | -1.49877   | 5.00E-05 | 0.00026  |
| PGN_1618 |      | methionine gamma-lyase                                               | -1.03434   | 0.00055  | 0.002076 |
| PGN_1619 |      | transposase in ISPg1                                                 | -2.56714   | 5.00E-05 | 0.00026  |
| PGN_1620 |      | hypothetical protein                                                 | -0.834246  | 0.0119   | 0.029425 |
| PGN_1621 |      | conserved hypothetical protein                                       | -2.32829   | 5.00E-05 | 0.00026  |
| PGN_1622 |      | conserved hypothetical protein                                       | -1.76516   | 5.00E-05 | 0.00026  |
| PGN_1623 |      | conserved hypothetical protein                                       | -1.45041   | 5.00E-05 | 0.00026  |
| PGN_1624 |      | conserved hypothetical protein                                       | -1.15452   | 0.3743   | 0.491904 |

|          |      |                                                                   |            |          |          |
|----------|------|-------------------------------------------------------------------|------------|----------|----------|
| PGN_1625 |      | conserved hypothetical protein                                    | -0.724538  | 0.0147   | 0.035164 |
| PGN_1627 |      | probable 4-amino-4-deoxy-L-arabinose transferase                  | -0.766205  | 0.00715  | 0.019196 |
| PGN_1628 |      | putative glycosyltransferases                                     | -0.796231  | 0.0045   | 0.012947 |
| PGN_1629 |      | conserved hypothetical protein with integral membrane domain DUF6 | 0.623951   | 0.02915  | 0.062814 |
| PGN_1630 | rho  | transcription termination factor Rho                              | 0.621659   | 0.0372   | 0.076521 |
| PGN_1631 |      | putative DNA-binding protein histone-like family                  | 2.30006    | 5.00E-05 | 0.00026  |
| PGN_1632 |      | hypothetical protein                                              | 1.57356    | 5.00E-05 | 0.00026  |
| PGN_1633 |      | formiminotransferase-cyclodeaminase                               | -0.356372  | 0.2422   | 0.352456 |
| PGN_1634 |      | imidazolonepropionase                                             | -0.137308  | 0.63435  | 0.734783 |
| PGN_1635 |      | conserved hypothetical protein with nucleoside recognition domain | -0.582695  | 0.0452   | 0.0896   |
| PGN_1636 |      | conserved hypothetical protein                                    | 1.54011    | 5.00E-05 | 0.00026  |
| PGN_1637 |      | putative methenyltetrahydrofolate cyclohydrolase                  | 1.91137    | 5.00E-05 | 0.00026  |
| PGN_1638 |      | histidine ammonia-lyase                                           | 1.13991    | 5.00E-05 | 0.00026  |
| PGN_1639 |      | conserved hypothetical protein                                    | 1.6212     | 5.00E-05 | 0.00026  |
| PGN_1640 |      | serine/threonine transporter                                      | 0.76464    | 0.0084   | 0.021997 |
| PGN_1641 |      | arginine/ornithine transport system ATPase                        | -0.0964903 | 0.73795  | 0.817427 |
| PGN_1642 |      | conserved hypothetical protein                                    | -0.611541  | 0.0435   | 0.086796 |
| PGN_1643 |      | conserved hypothetical protein                                    | -1.25907   | 0.0001   | 0.000483 |
| PGN_1644 |      | transposase in ISPg1                                              | -2.34034   | 5.00E-05 | 0.00026  |
| PGN_1645 |      | putative dipeptidyl peptidase III                                 | 0.378194   | 0.17735  | 0.274602 |
| PGN_1646 |      | seryl-tRNA synthetase                                             | 1.20882    | 0.0001   | 0.000483 |
| PGN_1647 | rpmA | putative 50S ribosomal protein L27                                | 2.15757    | 5.00E-05 | 0.00026  |
| PGN_1648 | rplU | putative 50S ribosomal protein L21                                | 2.26294    | 5.00E-05 | 0.00026  |
| PGN_1649 |      | conserved hypothetical protein                                    | -0.550564  | 0.20295  | 0.306658 |
| PGN_1650 |      | conserved hypothetical protein                                    | 0.0843684  | 0.8942   | 0.932754 |
| PGN_1651 |      | putative glycosyltransferase                                      | -0.122884  | 0.78805  | 0.855127 |
| PGN_1652 |      | probable nitroreductase                                           | 0.331243   | 0.61675  | 0.718698 |
| PGN_1653 |      | putative thiamine biosynthesis lipoprotein ApbE                   | 0.473777   | 0.562    | 0.671059 |
| PGN_1654 |      | putative electron transport complex RnfABCDGE type A subunit      | 0.592901   | 0.043    | 0.086503 |
| PGN_1655 |      | putative electron transport complex RnfABCDGE type E subunit      | 0.461384   | 0.44215  | 0.558326 |
| PGN_1656 |      | putative electron transport complex RnfABCDGE type G subunit      | 0.0962991  | 0.8577   | 0.904878 |
| PGN_1657 |      | electron transport complex RnfABCDGE type D subunit               | 0.273993   | 0.59125  | 0.69392  |
| PGN_1658 |      | electron transport complex RnfABCDGE type C subunit               | 0.141189   | 0.64505  | 0.743536 |
| PGN_1659 |      | putative electron transport complex RnfABCDGE type B subunit      | 0.109822   | 0.71245  | 0.798319 |
| PGN_1660 |      | conserved hypothetical protein                                    | -0.315814  | 0.2805   | 0.395486 |
| PGN_1661 |      | conserved hypothetical protein                                    | -0.935807  | 0.00095  | 0.003316 |
| PGN_1662 |      | partial transposase in ISPg3                                      | -0.231307  | 0.5984   | 0.701831 |
| PGN_1663 |      | hypothetical protein                                              | -0.892649  | 0.0656   | 0.121657 |
| PGN_1664 |      | conserved hypothetical protein                                    | -2.14945   | 5.00E-05 | 0.00026  |
| PGN_1665 |      | hypothetical protein                                              | 1.15315    | 0.08435  | 0.149154 |
| PGN_1666 |      | phosphoribosylformylglycinamide synthase                          | -0.882283  | 0.0085   | 0.022204 |
| PGN_1667 |      | putative DNA processing Smf-like protein                          | 0.390506   | 0.7038   | 0.792661 |
| PGN_1668 |      | conserved hypothetical protein                                    | 0.504071   | 0.0679   | 0.125051 |
| PGN_1669 |      | transposase in ISPg1                                              | -2.48894   | 5.00E-05 | 0.00026  |
| PGN_1670 |      | conserved hypothetical protein with predicted lysozyme domain     | -1.98416   | 5.00E-05 | 0.00026  |
| PGN_1671 |      | probable chromate transport protein                               | -1.23489   | 0.00015  | 0.000685 |
| PGN_1672 |      | probable chromate transport protein                               | -0.022105  | 0.9372   | 0.956825 |
| PGN_1673 |      | Por secretion system protein porN/gldN                            | 1.96986    | 5.00E-05 | 0.00026  |
| PGN_1674 |      | Por secretion system protein porM/gldM                            | 1.98866    | 5.00E-05 | 0.00026  |
| PGN_1675 |      | Por secretion system protein porL/gldL                            | 1.58494    | 5.00E-05 | 0.00026  |
| PGN_1676 |      | Por secretion system protein porK/gldK                            | 1.49036    | 5.00E-05 | 0.00026  |
| PGN_1677 |      | Por secretion system protein porP                                 | 1.87914    | 5.00E-05 | 0.00026  |
| PGN_1678 |      | conserved hypothetical protein                                    | 2.38073    | 5.00E-05 | 0.00026  |
| PGN_1679 |      | conserved hypothetical protein                                    | -1.41496   | 0.0004   | 0.001607 |
| PGN_1680 |      | putative ABC transporter permease protein                         | -0.549292  | 0.1149   | 0.19171  |
| PGN_1681 |      | putative ABC transporter ATP-binding protein                      | -0.709319  | 0.0821   | 0.146146 |
| PGN_1682 |      | probable ABC transporter permease protein                         | -0.490453  | 0.16225  | 0.254742 |
| PGN_1683 |      | probable ABC transporter permease protein                         | -0.572487  | 0.11555  | 0.192493 |
| PGN_1684 |      | hypothetical protein                                              | 0.0609839  | 0.944    | 0.960233 |
| PGN_1685 |      | NADP-dependent malate dehydrogenase                               | -0.0651727 | 0.8194   | 0.876194 |
| PGN_1686 |      | hypothetical protein                                              | -1.19896   | 0.00815  | 0.021555 |
| PGN_1687 |      | conserved hypothetical protein                                    | -0.885034  | 0.00335  | 0.009989 |

|          |        |                                                                       |             |          |          |
|----------|--------|-----------------------------------------------------------------------|-------------|----------|----------|
| PGN_1688 |        | putative ribose 5-phosphate isomerase B                               | -0.993668   | 0.00185  | 0.00595  |
| PGN_1689 |        | transketolase                                                         | -0.417192   | 0.16115  | 0.253576 |
| PGN_1690 |        | putative exported fucosidase                                          | -1.6516     | 5.00E-05 | 0.00026  |
| PGN_1691 |        | putative cysteine desulfurase                                         | 0.225297    | 0.49855  | 0.611413 |
| PGN_1692 |        | conserved hypothetical protein                                        | 1.2096      | 0.56165  | 0.671017 |
| PGN_1693 |        | selenide water dikinase                                               | 0.63815     | 0.3595   | 0.478659 |
| PGN_1694 |        | putative alanyl dipeptidyl peptidase                                  | 0.897555    | 0.0021   | 0.006663 |
| PGN_1695 |        | putative fructose-bisphosphate aldolase class I                       | -1.07565    | 0.002    | 0.006413 |
| PGN_1696 |        | conserved hypothetical protein                                        | -1.74872    | 0.00025  | 0.00108  |
| PGN_1697 |        | conserved hypothetical protein                                        | 0.75112     | 0.0063   | 0.01724  |
| PGN_1698 | rpsO   | putative 30S ribosomal protein S15                                    | 2.1627      | 5.00E-05 | 0.00026  |
| PGN_1699 |        | probable zinc ABC transporter zinc-binding protein                    | -0.644993   | 0.02635  | 0.057361 |
| PGN_1700 |        | probable metal uptake system ABC transporter ATP-binding protein      | -0.72915    | 0.05505  | 0.104738 |
| PGN_1701 |        | conserved hypothetical protein                                        | -0.743191   | 0.10275  | 0.174446 |
| PGN_1702 |        | protein-export membrane protein SecD/SecF                             | 0.791958    | 0.0185   | 0.042672 |
| PGN_1703 |        | putative ribonuclease III                                             | -0.167387   | 0.56995  | 0.677134 |
| PGN_1704 |        | beta-ketoacyl-acyl-carrier-protein synthase II                        | -0.587781   | 0.23435  | 0.343144 |
| PGN_1705 | acpP   | putative acyl carrier protein                                         | -0.594682   | 0.09955  | 0.169961 |
| PGN_1706 |        | probable phosphoribosylglycinamide formyltransferase                  | 0.68389     | 0.0774   | 0.138824 |
| PGN_1707 |        | conserved hypothetical protein                                        | 1.01652     | 0.0172   | 0.040108 |
| PGN_1708 |        | magnesium chelatase subunit ChII                                      | 0.239475    | 0.3975   | 0.514454 |
| PGN_1709 |        | conserved hypothetical protein                                        | 0.243804    | 0.4019   | 0.518259 |
| PGN_1710 |        | conserved hypothetical protein                                        | -0.879212   | 0.00345  | 0.010273 |
| PGN_1711 | pheS   | phenylalanyl-tRNA synthetase alpha subunit                            | 0.719539    | 0.01395  | 0.033483 |
| PGN_1712 |        | putative endonuclease III                                             | 0.0812867   | 0.7695   | 0.842296 |
| PGN_1713 |        | conserved hypothetical protein                                        | 0.2487      | 0.65235  | 0.749786 |
| PGN_1714 |        | transcription-repair coupling factor                                  | -0.61708    | 0.0832   | 0.147611 |
| PGN_1715 | grpE   | putative chaperone protein GrpE                                       | -0.772442   | 0.0076   | 0.020251 |
| PGN_1716 | dnaJ   | chaperone protein DnaJ                                                | -0.712733   | 0.018    | 0.0417   |
| PGN_1717 |        | conserved hypothetical protein                                        | -0.71371    | 0.0106   | 0.026739 |
| PGN_1718 |        | probable UDP-2,3-diacetylglucosamine hydrolase                        | -0.42956    | 0.12645  | 0.206927 |
| PGN_1719 |        | conserved hypothetical protein with appr-1-p processing enzyme domain | -0.0482882  | 0.8649   | 0.90963  |
| PGN_1720 |        | hypothetical protein                                                  | 0.340139    | 0.42635  | 0.543532 |
| PGN_1721 |        | 8-amino-7-oxononanoate synthase                                       | -0.0473623  | 0.87635  | 0.918184 |
| PGN_1722 |        | putative uridine kinase                                               | 0.019284    | 0.945    | 0.960233 |
| PGN_1723 |        | conserved hypothetical protein                                        | 0.992782    | 0.0011   | 0.003753 |
| PGN_1724 |        | conserved hypothetical protein                                        | 0.846083    | 0.1865   | 0.285807 |
| PGN_1725 |        | probable polysaccharide deacetylase                                   | -1.0952     | 0.02695  | 0.058488 |
| PGN_1726 |        | transposase in ISPg3                                                  | -0.311341   | 0.2908   | 0.407044 |
| PGN_1727 |        | transposase in ISPg1                                                  | -2.42416    | 5.00E-05 | 0.00026  |
| PGN_1728 | kgp    | lysine-specific cysteine proteinase Kgp                               | 0.00429063  | 0.9909   | 0.991816 |
| PGN_1729 |        | probable acetyltransferase                                            | -0.00724004 | 0.98005  | 0.986071 |
| PGN_1730 |        | conserved hypothetical protein                                        | -0.133423   | 0.6595   | 0.753259 |
| PGN_1731 |        | conserved hypothetical protein                                        | -1.15582    | 0.06215  | 0.116785 |
| PGN_1732 |        | hypothetical protein                                                  | -1.6927     | 0.00705  | 0.018951 |
| PGN_1733 | hagA   | hemagglutinin protein HagA                                            | -3.09185    | 5.00E-05 | 0.00026  |
| PGN_1734 |        | nucleoside permease NupG                                              | 1.00719     | 0.00065  | 0.00239  |
| PGN_1735 |        | conserved hypothetical protein                                        | 0.813404    | 0.008    | 0.021184 |
| PGN_1736 |        | putative glycogen synthase                                            | -0.434267   | 0.16335  | 0.255715 |
| PGN_1737 | recQII | ATP-dependent DNA helicase RecQ                                       | -1.18635    | 0.0002   | 0.000895 |
| PGN_1738 |        | putative long-chain-fatty-acid-CoA ligase                             | -0.529852   | 0.09535  | 0.164373 |
| PGN_1739 |        | conserved hypothetical protein                                        | 0.865471    | 0.0055   | 0.015307 |
| PGN_1740 |        | putative RNA polymerase ECF-type sigma factor                         | -1.19075    | 0.001    | 0.003462 |
| PGN_1741 |        | conserved hypothetical protein                                        | -0.848247   | 0.00865  | 0.022486 |
| PGN_1742 |        | conserved hypothetical protein                                        | -0.558897   | 0.3906   | 0.508616 |
| PGN_1743 | eno    | phosphopyruvate hydratase                                             | 0.853185    | 0.00375  | 0.011073 |
| PGN_1744 |        | conserved hypothetical protein                                        | -0.44133    | 0.16395  | 0.256245 |
| PGN_1745 |        | putative NapC/NirT cytochrome c-type protein                          | -1.51774    | 5.00E-05 | 0.00026  |
| PGN_1746 |        | cytochrome c nitrite reductase catalytic subunit NrfA                 | -1.99696    | 5.00E-05 | 0.00026  |
| PGN_1747 |        | conserved hypothetical protein                                        | -0.987877   | 0.0026   | 0.008022 |
| PGN_1748 |        | putative cytochrome c biogenesis protein CcsA                         | -0.893304   | 0.13875  | 0.223957 |
| PGN_1749 |        | probable NADPH-quinone reductase                                      | 0.145719    | 0.73245  | 0.813915 |

|          |      |                                                                 |            |          |          |
|----------|------|-----------------------------------------------------------------|------------|----------|----------|
| PGN_1750 |      | putative 3-deoxy-D-manno-octulosonate cytidyltransferase        | 0.0532439  | 0.89025  | 0.929089 |
| PGN_1751 |      | DNA primase                                                     | 0.0792143  | 0.7814   | 0.850512 |
| PGN_1752 |      | putative ferredoxin 4Fe-4S                                      | -1.24345   | 0.0001   | 0.000483 |
| PGN_1753 |      | putative 2-oxoglutarate oxidoreductase alpha subunit            | -1.05616   | 0.00135  | 0.004519 |
| PGN_1754 |      | hypothetical protein                                            | -1.48571   | 5.00E-05 | 0.00026  |
| PGN_1755 |      | putative 2-oxoglutarate oxidoreductase beta subunit             | -0.935061  | 0.00225  | 0.007076 |
| PGN_1756 |      | putative 2-oxoglutarate oxidoreductase gamma subunit            | -0.765567  | 0.01235  | 0.030292 |
| PGN_1757 |      | GTP pyrophosphokinase                                           | -1.22559   | 0.0002   | 0.000895 |
| PGN_1758 |      | putative v-type ATPase subunit K                                | 2.42124    | 5.00E-05 | 0.00026  |
| PGN_1759 |      | putative v-type ATPase subunit I                                | 1.54896    | 5.00E-05 | 0.00026  |
| PGN_1760 |      | putative v-type ATPase subunit D                                | 0.813375   | 0.3055   | 0.422344 |
| PGN_1761 |      | v-type ATPase subunit B                                         | 0.993603   | 0.0003   | 0.00126  |
| PGN_1762 |      | v-type ATPase subunit A                                         | 2.24128    | 5.00E-05 | 0.00026  |
| PGN_1763 |      | conserved hypothetical protein                                  | 1.66545    | 5.00E-05 | 0.00026  |
| PGN_1764 |      | putative v-type ATPase subunit E                                | 2.61345    | 5.00E-05 | 0.00026  |
| PGN_1765 |      | hypothetical protein                                            | -0.652967  | 0.5644   | 0.672416 |
| PGN_1766 |      | conserved hypothetical protein                                  | -0.214886  | 0.7634   | 0.837341 |
| PGN_1767 |      | immunoreactive 46 kDa antigen                                   | -2.0675    | 5.00E-05 | 0.00026  |
| PGN_1768 | gppX | putative DNA-binding response regulator/sensor histidine kinase | 0.385191   | 0.1815   | 0.279605 |
| PGN_1769 |      | hypothetical protein                                            | -0.131068  | 0.65495  | 0.749786 |
| PGN_1770 |      | conserved hypothetical protein                                  | 0.268876   | 0.3996   | 0.515918 |
| PGN_1771 |      | DNA polymerase I                                                | -0.535261  | 0.0651   | 0.121232 |
| PGN_1772 |      | 1,4-alpha-glucan branching enzyme                               | -1.26852   | 0.0162   | 0.038195 |
| PGN_1773 |      | sodium/hydrogen antiporter                                      | -1.1426    | 0.0056   | 0.015565 |
| PGN_1774 |      | conserved hypothetical protein                                  | -0.250367  | 0.7433   | 0.821644 |
| PGN_1775 |      | conserved hypothetical protein                                  | -0.340504  | 0.2793   | 0.394055 |
| PGN_1776 |      | peptidyl-dipeptidase                                            | 1.08595    | 0.00015  | 0.000685 |
| PGN_1777 |      | bleomycin hydrolase                                             | 1.95568    | 5.00E-05 | 0.00026  |
| PGN_1778 |      | hypothetical protein                                            | -0.46788   | 0.5877   | 0.691014 |
| PGN_1779 |      | conserved hypothetical protein                                  | 2.74276    | 1        | 1        |
| PGN_1780 |      | putative YjgF-like protein                                      | 0.324771   | 0.2637   | 0.37755  |
| PGN_1781 |      | putative tRNA:rRNA methyltransferase                            | 0.665371   | 0.30935  | 0.426835 |
| PGN_1782 |      | DNA repair protein RecN                                         | 0.29934    | 0.3647   | 0.482865 |
| PGN_1783 |      | conserved hypothetical protein                                  | -0.0322891 | 0.95315  | 0.966313 |
| PGN_1784 |      | DNA/pantothenate metabolism flavoprotein                        | -0.300334  | 0.39205  | 0.509881 |
| PGN_1785 |      | putative DNA polymerase III epsilon chain                       | -0.607553  | 0.0347   | 0.072074 |
| PGN_1786 |      | putative DNA polymerase III beta chain                          | -0.887121  | 0.00375  | 0.011073 |
| PGN_1787 |      | probable 5-formyltetrahydrofolate cyclo-ligase                  | 0.289402   | 0.30785  | 0.425041 |
| PGN_1788 |      | carboxyl-terminal processing protease                           | 1.1565     | 0.00015  | 0.000685 |
| PGN_1789 |      | putative deoxycytidylate deaminase                              | 0.220208   | 0.45625  | 0.572396 |
| PGN_1790 |      | conserved hypothetical protein                                  | 2.64664    | 5.00E-05 | 0.00026  |
| PGN_1791 |      | putative flavodoxin                                             | 3.18349    | 5.00E-05 | 0.00026  |
| PGN_1792 |      | glycerate kinase                                                | -0.942409  | 0.00115  | 0.003911 |
| PGN_1793 |      | conserved hypothetical protein                                  | -0.654447  | 0.02385  | 0.052673 |
| PGN_1794 |      | conserved hypothetical protein                                  | -1.77764   | 5.00E-05 | 0.00026  |
| PGN_1795 |      | conserved hypothetical protein                                  | -1.93059   | 0.00865  | 0.022486 |
| PGN_1796 |      | conserved hypothetical protein                                  | -1.38094   | 0.0001   | 0.000483 |
| PGN_1797 |      | conserved hypothetical protein                                  | -0.501438  | 0.0829   | 0.147324 |
| PGN_1798 |      | conserved hypothetical protein                                  | 0.0812974  | 0.77745  | 0.847512 |
| PGN_1799 |      | hypothetical protein                                            | 0.304136   | 0.4551   | 0.571965 |
| PGN_1800 |      | urocanate hydratase                                             | 0.794663   | 0.01075  | 0.027021 |
| PGN_1801 |      | conserved hypothetical protein                                  | -0.462078  | 0.4199   | 0.536917 |
| PGN_1802 |      | hemolysin                                                       | 0.761785   | 0.033    | 0.069699 |
| PGN_1803 |      | conserved hypothetical protein                                  | 0.214245   | 0.45285  | 0.569809 |
| PGN_1804 |      | Na <sup>+</sup> /H <sup>+</sup> antiporter                      | -0.121902  | 0.6898   | 0.781994 |
| PGN_1805 | cysS | cysteinyI-tRNA synthetase                                       | -0.525272  | 0.07005  | 0.128345 |
| PGN_1806 |      | conserved hypothetical protein                                  | -0.157676  | 0.57555  | 0.681884 |
| PGN_1807 |      | putative glycosyltransferase                                    | -0.0249709 | 0.9292   | 0.952922 |
| PGN_1808 |      | conserved hypothetical protein                                  | 0.334016   | 0.24595  | 0.356912 |
| PGN_1809 |      | hypothetical protein                                            | -0.247137  | 0.4584   | 0.573255 |
| PGN_1810 |      | hypothetical protein                                            | 0.343336   | 0.2536   | 0.365764 |
| PGN_1811 |      | putative alpha-L-fucosidase                                     | -0.592669  | 0.048    | 0.09384  |

|          |      |                                                  |            |          |          |
|----------|------|--------------------------------------------------|------------|----------|----------|
| PGN_1812 |      | polyphosphate kinase                             | -0.892065  | 0.00325  | 0.009732 |
| PGN_1813 |      | GTP-binding protein                              | -0.905131  | 0.0021   | 0.006663 |
| PGN_1814 |      | conserved hypothetical protein                   | 0.3613     | 0.2402   | 0.350264 |
| PGN_1815 |      | conserved hypothetical protein                   | 0.460519   | 0.52235  | 0.635839 |
| PGN_1816 |      | conserved hypothetical protein                   | 1.17655    | 5.00E-05 | 0.00026  |
| PGN_1817 |      | conserved hypothetical protein                   | -0.202382  | 0.4664   | 0.580682 |
| PGN_1818 |      | conserved hypothetical protein                   | 0.274636   | 0.3742   | 0.491904 |
| PGN_1819 |      | hypothetical protein                             | 0.0252183  | 0.9796   | 0.986071 |
| PGN_1820 |      | conserved hypothetical protein                   | 0.399737   | 0.1864   | 0.285807 |
| PGN_1821 |      | conserved hypothetical protein                   | 0.314446   | 0.2834   | 0.39852  |
| PGN_1822 |      | hypothetical protein                             | 0.550421   | 0.3713   | 0.488867 |
| PGN_1823 |      | conserved hypothetical protein                   | 1.1532     | 0.0051   | 0.014324 |
| PGN_1824 |      | hypothetical protein                             | 0.0365191  | 0.9289   | 0.952922 |
| PGN_1825 |      | hypothetical protein                             | -0.760371  | 0.0677   | 0.124899 |
| PGN_1826 |      | conserved hypothetical protein                   | -0.145191  | 0.8103   | 0.870496 |
| PGN_1827 |      | S-adenosylmethionine synthase                    | -2.39382   | 5.00E-05 | 0.00026  |
| PGN_1828 |      | conserved hypothetical protein                   | -0.361978  | 0.31265  | 0.430826 |
| PGN_1829 |      | probable nicotinamide mononucleotide transporter | 0.203371   | 0.6659   | 0.759347 |
| PGN_1830 |      | putative TonB-dependent receptor                 | 0.00496681 | 0.98525  | 0.9885   |
| PGN_1831 |      | putative GTPase                                  | -0.109774  | 0.69195  | 0.78318  |
| PGN_1832 | frr  | putative ribosome recycling factor               | -0.582291  | 0.04535  | 0.089814 |
| PGN_1833 | pyrH | putative uridylate kinase                        | -0.780026  | 0.00885  | 0.022922 |
| PGN_1834 |      | conserved hypothetical protein                   | -0.727643  | 0.01205  | 0.029693 |
| PGN_1835 |      | conserved hypothetical protein                   | 0.227511   | 0.63045  | 0.731061 |
| PGN_1836 |      | transposase in ISPg3                             | -0.539785  | 0.0706   | 0.129182 |
| PGN_1837 |      | conserved hypothetical protein                   | -2.49482   | 5.00E-05 | 0.00026  |
| PGN_1838 |      | partial transposase in ISPg1                     | -2.36636   | 5.00E-05 | 0.00026  |
| PGN_1839 |      | partial transposase in ISPg1                     | -2.83725   | 5.00E-05 | 0.00026  |
| PGN_1840 | rplQ | 50S ribosomal protein L17                        | 1.36145    | 0.0001   | 0.000483 |
| PGN_1841 | rpoA | DNA-directed RNA polymerase alpha subunit        | 1.2693     | 0.0001   | 0.000483 |
| PGN_1842 | rpsD | 30S ribosomal protein S4                         | 1.86171    | 5.00E-05 | 0.00026  |
| PGN_1843 | rpsK | 30S ribosomal protein S11                        | 1.84036    | 5.00E-05 | 0.00026  |
| PGN_1844 | rpsM | 30S ribosomal protein S13                        | 1.56528    | 5.00E-05 | 0.00026  |
| PGN_1845 | rpmJ | 50S ribosomal protein L36                        | 1.70243    | 5.00E-05 | 0.00026  |
| PGN_1846 | infA | translation initiation factor IF-1               | 1.49355    | 5.00E-05 | 0.00026  |
| PGN_1847 |      | putative methionine aminopeptidase type I        | 1.16393    | 0.0631   | 0.118049 |
| PGN_1848 | secY | preprotein translocase SecY subunit              | 1.22835    | 0.0015   | 0.004944 |
| PGN_1849 | rplO | 50S ribosomal protein L15                        | 0.78595    | 0.0068   | 0.018395 |
| PGN_1850 | rpmD | 50S ribosomal protein L30                        | 1.26033    | 5.00E-05 | 0.00026  |
| PGN_1851 | rpsE | 30S ribosomal protein S5                         | 1.08363    | 0.00015  | 0.000685 |
| PGN_1852 | rplR | 50S ribosomal protein L18                        | 1.35795    | 5.00E-05 | 0.00026  |
| PGN_1853 | rplF | 50S ribosomal protein L6                         | 1.36503    | 5.00E-05 | 0.00026  |
| PGN_1854 | rpsH | 30S ribosomal protein S8                         | 1.47836    | 5.00E-05 | 0.00026  |
| PGN_1855 | rpsN | 30S ribosomal protein S14                        | 1.67644    | 5.00E-05 | 0.00026  |
| PGN_1856 | rplE | 50S ribosomal protein L5                         | 1.41067    | 5.00E-05 | 0.00026  |
| PGN_1857 | rplX | 50S ribosomal protein L24                        | 1.44283    | 0.02505  | 0.054755 |
| PGN_1858 | rplN | 50S ribosomal protein L14                        | 1.35971    | 5.00E-05 | 0.00026  |
| PGN_1859 | rpsQ | 30S ribosomal protein S17                        | 1.46918    | 5.00E-05 | 0.00026  |
| PGN_1860 | rpmC | 50S ribosomal protein L29                        | 1.50863    | 5.00E-05 | 0.00026  |
| PGN_1861 | rplP | 50S ribosomal protein L16                        | 1.5161     | 5.00E-05 | 0.00026  |
| PGN_1862 | rpsC | 30S ribosomal protein S3                         | 1.38443    | 5.00E-05 | 0.00026  |
| PGN_1863 | rplV | 50S ribosomal protein L22                        | 1.57908    | 5.00E-05 | 0.00026  |
| PGN_1864 | rpsS | 30S ribosomal protein S19                        | 1.6038     | 5.00E-05 | 0.00026  |
| PGN_1865 | rplB | 50S ribosomal protein L2                         | 1.59935    | 5.00E-05 | 0.00026  |
| PGN_1866 | rplW | 50S ribosomal protein L23                        | 1.80594    | 5.00E-05 | 0.00026  |
| PGN_1867 | rplD | 50S ribosomal protein L4                         | 1.52848    | 0.0005   | 0.001921 |
| PGN_1868 | rplC | 50S ribosomal protein L3                         | 1.93212    | 5.00E-05 | 0.00026  |
| PGN_1869 | rpsJ | 30S ribosomal protein S10                        | 2.0155     | 5.00E-05 | 0.00026  |
| PGN_1870 |      | translation elongation factor G                  | 1.45628    | 5.00E-05 | 0.00026  |
| PGN_1871 | rpsG | 30S ribosomal protein S7                         | 2.14457    | 5.00E-05 | 0.00026  |
| PGN_1872 | rpsL | 30S ribosomal protein S12                        | 1.9181     | 5.00E-05 | 0.00026  |
| PGN_1873 |      | conserved hypothetical protein                   | -0.653403  | 0.0226   | 0.050541 |

|          |      |                                                       |            |          |          |
|----------|------|-------------------------------------------------------|------------|----------|----------|
| PGN_1874 |      | putative 3-phosphoshikimate 1-carboxyvinyltransferase | -0.898094  | 0.004    | 0.011666 |
| PGN_1875 |      | conserved hypothetical protein                        | -0.898631  | 0.2654   | 0.379219 |
| PGN_1876 |      | putative ABC transporter membrane protein             | -0.315193  | 0.703    | 0.792661 |
| PGN_1877 |      | Por secretion system protein porW/sprE                | -0.180856  | 0.6162   | 0.71845  |
| PGN_1878 |      | conserved hypothetical protein                        | -0.208276  | 0.4625   | 0.577176 |
| PGN_1879 |      | hypothetical protein                                  | -0.0907616 | 0.8069   | 0.868499 |
| PGN_1880 |      | malate dehydrogenase                                  | -1.11093   | 0.00105  | 0.003606 |
| PGN_1881 |      | conserved hypothetical protein                        | -1.89068   | 5.00E-05 | 0.00026  |
| PGN_1882 |      | probable permease                                     | -0.795697  | 0.00685  | 0.018484 |
| PGN_1883 |      | glutaminyl-tRNA synthetase                            | -0.505593  | 0.09045  | 0.157713 |
| PGN_1884 |      | probable alkaline phosphatase                         | 0.0246523  | 0.9291   | 0.952922 |
| PGN_1885 |      | conserved hypothetical protein                        | 0.291852   | 0.31545  | 0.433846 |
| PGN_1886 |      | putative NAD dependent epimerase                      | 0.74926    | 0.0073   | 0.019549 |
| PGN_1887 |      | hypothetical protein                                  | -0.0979642 | 0.80915  | 0.870041 |
| PGN_1888 |      | 4-hydroxybutyrate CoA-transferase                     | 0.973332   | 0.0011   | 0.003753 |
| PGN_1889 |      | conserved hypothetical protein                        | 2.0584     | 5.00E-05 | 0.00026  |
| PGN_1890 | rpmG | 50S ribosomal protein L33                             | 2.24414    | 5.00E-05 | 0.00026  |
| PGN_1891 | rpmB | 50S ribosomal protein L28                             | 2.07858    | 5.00E-05 | 0.00026  |
| PGN_1892 |      | conserved hypothetical protein                        | 0.154628   | 0.615    | 0.717444 |
| PGN_1893 |      | hypothetical protein                                  | -0.38217   | 0.1763   | 0.273374 |
| PGN_1894 |      | conserved hypothetical protein                        | -1.33673   | 0.1036   | 0.175609 |
| PGN_1895 |      | conserved hypothetical protein                        | -0.180773  | 0.73675  | 0.816948 |
| PGN_1896 |      | galactose-1-phosphate transferase                     | 0.191873   | 0.75845  | 0.834445 |
| PGN_1897 |      | putative transport related membrane protein           | 0.481747   | 0.38835  | 0.506616 |
| PGN_1898 |      | probable transport protein                            | 0.552239   | 0.435    | 0.551259 |
| PGN_1899 |      | conserved hypothetical protein                        | -1.21132   | 5.00E-05 | 0.00026  |
| PGN_1900 |      | hypothetical protein                                  | -0.619565  | 0.14075  | 0.226669 |
| PGN_1901 |      | transposase in ISPg1                                  | -2.36026   | 5.00E-05 | 0.00026  |
| PGN_1902 |      | conserved hypothetical protein                        | -0.968148  | 0.05375  | 0.102816 |
| PGN_1903 |      | putative adenine-specific DNA methyltransferase       | -0.83662   | 0.02235  | 0.050035 |
| PGN_1904 | hagB | hemagglutinin protein HagB                            | -0.356457  | 0.20655  | 0.311214 |
| PGN_1905 |      | conserved hypothetical protein                        | 1.95369    | 5.00E-05 | 0.00026  |
| PGN_1906 | hagC | hemagglutinin protein HagC                            | -0.380751  | 0.1811   | 0.27919  |
| PGN_1907 |      | conserved hypothetical protein                        | 0.996574   | 0.00065  | 0.00239  |
| PGN_1908 |      | hypothetical protein                                  | 2.85114    | 0.3418   | 0.460408 |
| PGN_1909 |      | conserved hypothetical protein                        | 0.61457    | 0.23755  | 0.346875 |
| PGN_1910 |      | conserved hypothetical protein                        | 0.643437   | 0.0915   | 0.159023 |
| PGN_1911 |      | transposase in ISPg3                                  | -0.598349  | 0.0431   | 0.086503 |
| PGN_1912 |      | partial transposase in ISPg6                          | 0.0670502  | 0.87835  | 0.919826 |
| PGN_1913 |      | transposase in ISPg3                                  | -0.275317  | 0.35325  | 0.472405 |
| PGN_1914 |      | carboxyl-terminal processing protease                 | 0.469948   | 0.12235  | 0.201145 |
| PGN_1915 |      | conserved hypothetical protein                        | -0.694477  | 0.03155  | 0.067372 |
| PGN_1916 |      | putative ABC transporter ATP-binding protein          | 0.604531   | 0.0286   | 0.061754 |
| PGN_1917 |      | putative ABC transporter ATP-binding protein          | 0.965317   | 0.0008   | 0.002848 |
| PGN_1918 |      | conserved hypothetical protein                        | 0.499308   | 0.07815  | 0.139816 |
| PGN_1919 |      | conserved hypothetical protein                        | 0.968256   | 0.00095  | 0.003316 |
| PGN_1920 |      | conserved hypothetical protein                        | 1.01113    | 0.00075  | 0.002697 |
| PGN_1921 |      | probable transcriptional regulator                    | 1.63324    | 5.00E-05 | 0.00026  |
| PGN_1922 |      | transposase in ISPg3                                  | -0.368711  | 0.19625  | 0.29844  |
| PGN_1923 |      | hypothetical protein                                  | -0.66993   | 0.17485  | 0.271521 |
| PGN_1924 |      | conserved hypothetical protein                        | -0.537439  | 0.1527   | 0.242611 |
| PGN_1925 |      | conserved hypothetical protein                        | -1.2525    | 5.00E-05 | 0.00026  |
| PGN_1926 |      | transposase in ISPg1                                  | -2.43203   | 5.00E-05 | 0.00026  |
| PGN_1927 |      | conserved hypothetical protein                        | -1.0902    | 0.0001   | 0.000483 |
| PGN_1928 |      | conserved hypothetical protein                        | -0.797546  | 0.1238   | 0.203059 |
| PGN_1929 |      | conserved hypothetical protein                        | -0.987785  | 0.10725  | 0.180502 |
| PGN_1930 |      | conserved hypothetical protein                        | -1.1558    | 0.0049   | 0.013873 |
| PGN_1931 |      | conserved hypothetical protein                        | -0.933887  | 0.00145  | 0.004794 |
| PGN_1932 |      | conserved hypothetical protein                        | -0.78834   | 0.00505  | 0.014222 |
| PGN_1933 |      | conserved hypothetical protein                        | -0.558392  | 0.04945  | 0.096321 |
| PGN_1934 |      | conserved hypothetical protein                        | -0.947004  | 0.0103   | 0.026137 |
| PGN_1935 |      | hypothetical protein                                  | -0.574071  | 0.03765  | 0.077297 |



|          |      |                                                 |            |          |          |
|----------|------|-------------------------------------------------|------------|----------|----------|
| PGN_1936 |      | conserved hypothetical protein                  | -0.730693  | 0.21875  | 0.325223 |
| PGN_1937 |      | glucose-inhibited division protein A            | -1.16407   | 0.00035  | 0.001436 |
| PGN_1938 | uvrC | excinuclease ABC C subunit                      | -0.725245  | 0.01075  | 0.027021 |
| PGN_1939 |      | putative D-tyrosyl-tRNA deacylase               | -0.787797  | 0.0097   | 0.024821 |
| PGN_1940 |      | conserved hypothetical protein                  | -0.721586  | 0.481    | 0.593652 |
| PGN_1941 |      | putative deoxyribose-phosphate aldolase         | -0.156635  | 0.59865  | 0.701831 |
| PGN_1942 |      | hypothetical protein                            | -0.158149  | 0.6297   | 0.730589 |
| PGN_1943 |      | putative polyprenyl synthetase                  | -0.233076  | 0.4187   | 0.536349 |
| PGN_1944 |      | conserved hypothetical protein                  | 0.18269    | 0.54375  | 0.655517 |
| PGN_1945 |      | probable signal peptidase-related protein       | -0.0617217 | 0.89465  | 0.932767 |
| PGN_1946 |      | signal peptidase I                              | -0.198476  | 0.5876   | 0.691014 |
| PGN_1947 | dapB | putative dihydrodipicolinate reductase          | -0.296926  | 0.29645  | 0.41319  |
| PGN_1948 |      | deoxyguanosinetriphosphate triphosphohydrolase  | -1.7196    | 5.00E-05 | 0.00026  |
| PGN_1949 |      | conserved hypothetical protein                  | -0.472718  | 0.1012   | 0.172226 |
| PGN_1950 |      | hypothetical protein                            | 0.240203   | 0.7661   | 0.83987  |
| PGN_1951 |      | conserved hypothetical protein                  | -0.0317815 | 0.9146   | 0.944776 |
| PGN_1952 |      | hypothetical protein                            | 0.185735   | 0.7157   | 0.801539 |
| PGN_1953 |      | TonB-dependent outer membrane receptor          | 0.760519   | 0.00725  | 0.01944  |
| PGN_1954 |      | probable DNA repair protein RecO                | -0.509055  | 0.06785  | 0.125051 |
| PGN_1955 |      | phosphomannomutase                              | -0.240836  | 0.4073   | 0.523449 |
| PGN_1956 |      | hypothetical protein                            | -0.850223  | 0.02215  | 0.049744 |
| PGN_1957 |      | transposase in ISPg1                            | -2.44489   | 5.00E-05 | 0.00026  |
| PGN_1959 |      | CRISPR-associated protein Cas2                  | -1.08132   | 0.20675  | 0.311295 |
| PGN_1960 |      | CRISPR-associated protein Cas1                  | -1.34734   | 0.0009   | 0.003178 |
| PGN_1961 |      | CRISPR-associated protein Cas4                  | -1.42493   | 0.0087   | 0.022588 |
| PGN_1962 |      | conserved hypothetical protein                  | -1.84941   | 5.00E-05 | 0.00026  |
| PGN_1963 |      | conserved hypothetical protein                  | -1.68431   | 5.00E-05 | 0.00026  |
| PGN_1964 |      | probable CRISPR-associated helicase Cas3 core   | -1.61869   | 5.00E-05 | 0.00026  |
| PGN_1965 |      | hypothetical protein                            | -2.06696   | 5.00E-05 | 0.00026  |
| PGN_1966 |      | conserved hypothetical protein                  | -1.73913   | 5.00E-05 | 0.00026  |
| PGN_1967 |      | putative sulfatase                              | 1.29426    | 5.00E-05 | 0.00026  |
| PGN_1968 |      | conserved hypothetical protein                  | 0.808245   | 0.0052   | 0.014586 |
| PGN_1969 | fmt  | putative methionyl-tRNA formyltransferase       | -1.40354   | 5.00E-05 | 0.00026  |
| PGN_1970 | rgpA | arginine-specific cysteine proteinase RgpA      | -0.45801   | 0.22065  | 0.327134 |
| PGN_1971 |      | hypothetical protein                            | -0.779249  | 0.3419   | 0.460408 |
| PGN_1972 |      | conserved hypothetical protein                  | -1.01746   | 0.39745  | 0.514454 |
| PGN_1973 |      | probable phosphoglycerate mutase                | -0.498605  | 0.08515  | 0.150443 |
| PGN_1974 |      | conserved hypothetical protein                  | -0.538576  | 0.07005  | 0.128345 |
| PGN_1975 |      | putative regulatory protein                     | -0.428611  | 0.1351   | 0.218643 |
| PGN_1976 |      | conserved hypothetical protein                  | 0.414154   | 0.1465   | 0.234687 |
| PGN_1977 |      | conserved hypothetical protein                  | -1.32444   | 5.00E-05 | 0.00026  |
| PGN_1978 |      | conserved hypothetical protein                  | -1.89069   | 5.00E-05 | 0.00026  |
| PGN_1979 |      | primosomal protein N                            | -1.04494   | 0.0007   | 0.002543 |
| PGN_1980 |      | putative NADPH-dependent glutamate synthase     | 0.683976   | 0.01795  | 0.041629 |
| PGN_1981 |      | conserved hypothetical protein                  | 0.968752   | 0.00185  | 0.00595  |
| PGN_1982 | trmD | putative tRNA guanine 1-methyltransferase       | -0.310121  | 0.2554   | 0.367894 |
| PGN_1983 |      | putative ion transporter                        | 0.262207   | 0.3558   | 0.474326 |
| PGN_1984 |      | hypothetical protein                            | -0.522747  | 0.30405  | 0.420612 |
| PGN_1985 |      | probable N-acetylmuramoyl-L-alanine amidase     | -0.402639  | 0.34595  | 0.464662 |
| PGN_1986 |      | DNA-binding protein, histone-like family        | -1.31094   | 5.00E-05 | 0.00026  |
| PGN_1987 |      | conserved hypothetical protein                  | -0.197888  | 0.468    | 0.5815   |
| PGN_1988 |      | conserved hypothetical protein                  | -1.13706   | 0.0004   | 0.001607 |
| PGN_1989 |      | conserved hypothetical protein with NIF3 domain | -1.12891   | 0.00035  | 0.001436 |
| PGN_1990 |      | conserved hypothetical protein                  | 0.827243   | 0.0066   | 0.017946 |
| PGN_1991 |      | putative cell-cycle protein                     | 0.284481   | 0.54845  | 0.658945 |
| PGN_1992 |      | putative helicase                               | -0.61867   | 0.12115  | 0.199635 |
| PGN_1993 |      | conserved hypothetical protein                  | -1.25456   | 5.00E-05 | 0.00026  |
| PGN_1994 |      | conserved hypothetical protein                  | -1.60403   | 5.00E-05 | 0.00026  |
| PGN_1995 |      | conserved hypothetical protein                  | -1.97251   | 5.00E-05 | 0.00026  |
| PGN_1996 | dapA | putative dihydrodipicolinate synthase           | -0.754581  | 0.01055  | 0.026644 |
| PGN_1997 | bioD | putative dethiobiotin synthase                  | -0.489092  | 0.07145  | 0.130349 |
| PGN_1998 |      | immunoreactive 23 kDa antigen                   | -0.12948   | 0.668    | 0.760512 |

|          |      |                                                                    |            |          |          |
|----------|------|--------------------------------------------------------------------|------------|----------|----------|
| PGN_1999 |      | putative dihydroorotate dehydrogenase                              | -0.622155  | 0.04595  | 0.090833 |
| PGN_2000 |      | hypothetical protein                                               | -0.373781  | 0.301    | 0.417686 |
| PGN_2001 |      | Por secretion system protein porY/putative sensor histidine kinase | -0.259544  | 0.35555  | 0.474326 |
| PGN_2002 |      | conserved hypothetical protein                                     | -0.83768   | 0.0084   | 0.021997 |
| PGN_2003 |      | single-stranded-DNA-specific exonuclease                           | -0.434934  | 0.21205  | 0.317926 |
| PGN_2004 |      | conserved hypothetical protein                                     | -0.347379  | 0.54785  | 0.658776 |
| PGN_2005 |      | conserved hypothetical protein                                     | -0.615881  | 0.04715  | 0.092689 |
| PGN_2006 |      | nicotinate phosphoribosyltransferase                               | -0.829945  | 0.00985  | 0.025085 |
| PGN_2007 | nadD | probable nicotinamide-nucleotide adenyllyltransferase              | -0.105597  | 0.90045  | 0.937239 |
| PGN_2008 |      | conserved hypothetical protein                                     | -1.09958   | 0.0002   | 0.000895 |
| PGN_2009 |      | conserved hypothetical protein                                     | 0.914594   | 0.02075  | 0.047298 |
| PGN_2010 |      | putative secreted protein                                          | 1.18682    | 5.00E-05 | 0.00026  |
| PGN_2011 |      | putative helicase                                                  | 0.659049   | 0.0198   | 0.045425 |
| PGN_2012 |      | outer membrane efflux protein                                      | 0.0880876  | 0.76     | 0.835122 |
| PGN_2013 |      | cation efflux system protein                                       | 0.0365201  | 0.90225  | 0.937341 |
| PGN_2014 |      | cation efflux system protein                                       | 0.345434   | 0.27335  | 0.387716 |
| PGN_2015 |      | conserved hypothetical protein                                     | 0.471559   | 0.5714   | 0.678478 |
| PGN_2016 |      | hypothetical protein                                               | -0.512641  | 0.06665  | 0.123375 |
| PGN_2017 |      | conserved hypothetical protein                                     | 0.370581   | 0.2018   | 0.305212 |
| PGN_2018 |      | putative UDP-N-acetylglucosamine acyltransferase                   | -0.234756  | 0.6488   | 0.747454 |
| PGN_2019 |      | UDP-3-O-[3-hydroxymyristoyl] N-acetylglucosamine deacetylase       | 0.0277393  | 0.9454   | 0.960233 |
| PGN_2020 | lpxD | UDP-3-O-[3-hydroxymyristoyl] glucosamine N-acyltransferase         | -0.46729   | 0.48765  | 0.599081 |
| PGN_2021 |      | orotidine 5'-phosphate decarboxylase                               | -0.34472   | 0.21725  | 0.323444 |
| PGN_2022 | prfA | peptide chain release factor 1                                     | -0.613176  | 0.0347   | 0.072074 |
| PGN_2023 |      | putative phosphoribosylformylglycinamide cyclo-ligase              | -0.552844  | 0.0584   | 0.110519 |
| PGN_2024 |      | putative hemagglutinin                                             | -0.404992  | 0.16395  | 0.256245 |
| PGN_2025 |      | conserved hypothetical protein                                     | -0.782075  | 0.14875  | 0.237459 |
| PGN_2026 |      | putative abortive infection protein                                | -0.701638  | 0.0505   | 0.097919 |
| PGN_2027 |      | conserved hypothetical protein                                     | 0.18618    | 0.70925  | 0.79641  |
| PGN_2028 |      | conserved hypothetical protein                                     | -0.374757  | 0.1866   | 0.285807 |
| PGN_2029 |      | conserved hypothetical protein                                     | 0.300082   | 0.273    | 0.387716 |
| PGN_2030 |      | conserved hypothetical protein                                     | -0.0321576 | 0.90635  | 0.93879  |
| PGN_2031 |      | L-serine dehydratase                                               | -0.138273  | 0.72035  | 0.804909 |
| PGN_2032 |      | putative alpha-galactosidase                                       | 0.435266   | 0.3312   | 0.450271 |
| PGN_2033 |      | ATP-dependent RNA helicase                                         | 1.78809    | 5.00E-05 | 0.00026  |
| PGN_2034 |      | probable sugar isomerase                                           | 1.36179    | 5.00E-05 | 0.00026  |
| PGN_2035 |      | putative peptidase                                                 | -0.258775  | 0.34345  | 0.461911 |
| PGN_2036 |      | hypothetical protein                                               | -0.876201  | 0.1282   | 0.209308 |
| PGN_2037 | dps  | DNA-binding protein from starved cells Dps                         | -3.72725   | 0.0024   | 0.007481 |
| PGN_2038 |      | conserved hypothetical protein                                     | -0.0211341 | 0.94285  | 0.960233 |
| PGN_2039 |      | conserved hypothetical protein                                     | 0.045693   | 0.86605  | 0.90963  |
| PGN_2040 |      | conserved hypothetical protein                                     | -0.513639  | 0.0652   | 0.121232 |
| PGN_2041 |      | putative alkaline protease AprF                                    | -0.137671  | 0.63545  | 0.735657 |
| PGN_2042 |      | DNA mismatch repair protein MutS                                   | 0.769795   | 0.0084   | 0.021997 |
| PGN_2043 |      | conserved hypothetical protein                                     | -0.11298   | 0.8324   | 0.885647 |
| PGN_2044 |      | conserved hypothetical protein                                     | -0.193645  | 0.95885  | 0.970243 |
| PGN_2045 | pheT | phenylalanyl-tRNA synthetase beta subunit                          | 0.220831   | 0.564    | 0.672416 |
| PGN_2046 |      | conserved hypothetical protein                                     | 0.793242   | 0.36575  | 0.483653 |
| PGN_2047 |      | conserved hypothetical protein                                     | 0.521522   | 0.44035  | 0.557375 |
| PGN_2048 |      | conserved hypothetical protein                                     | -1.42869   | 5.00E-05 | 0.00026  |
| PGN_2049 |      | conserved hypothetical protein                                     | 0.759273   | 0.01195  | 0.029515 |
| PGN_2050 |      | ATP-dependent helicase                                             | 0.986927   | 0.03385  | 0.070723 |
| PGN_2051 |      | conserved hypothetical protein                                     | 1.11769    | 0.04315  | 0.086503 |
| PGN_2052 |      | conserved hypothetical protein                                     | 1.32372    | 0.03275  | 0.06924  |
| PGN_2053 |      | conserved hypothetical protein                                     | -0.158701  | 0.5687   | 0.676026 |
| PGN_2054 |      | putative glycerol-3-phosphate cytidyltransferase                   | 0.60064    | 0.04405  | 0.087729 |
| PGN_2055 |      | putative 4-hydroxythreonine-4-phosphate dehydrogenase              | -0.0406799 | 0.88575  | 0.925754 |
| PGN_2056 |      | conserved hypothetical protein                                     | 0.369013   | 0.2094   | 0.314839 |
| PGN_2057 |      | conserved hypothetical protein                                     | -1.17402   | 0.0001   | 0.000483 |
| PGN_2058 |      | conserved hypothetical protein                                     | -0.529792  | 0.13515  | 0.218643 |
| PGN_2059 |      | conserved hypothetical protein                                     | 1.39783    | 0.00915  | 0.023584 |
| PGN_2060 | hisS | histidyl-tRNA synthetase                                           | 1.56199    | 5.00E-05 | 0.00026  |

|           |        |                                                 |            |          |          |
|-----------|--------|-------------------------------------------------|------------|----------|----------|
| PGN_2061  |        | probable dihydrofolate reductase                | 1.20507    | 5.00E-05 | 0.00026  |
| PGN_2062  | thyA   | thymidylate synthase                            | -0.347984  | 0.2254   | 0.332785 |
| PGN_2063  |        | hypothetical protein                            | #NAME?     | 1        | 1        |
| PGN_2064  |        | putative peptidase M48 family                   | -0.911341  | 0.00235  | 0.007347 |
| PGN_2065  |        | putative Lys- and Rgp- gingipain domain protein | -2.72732   | 5.00E-05 | 0.00026  |
| PGN_2066  |        | putative ABC transporter ATP-binding protein    | 0.859249   | 0.0863   | 0.151845 |
| PGN_2067  |        | TPR domain protein                              | 0.591056   | 0.10465  | 0.177247 |
| PGN_2068  | def    | putative peptide deformylase                    | 0.395285   | 0.14985  | 0.238438 |
| PGN_2069  |        | probable endonuclease                           | -0.6597    | 0.01875  | 0.043155 |
| PGN_2070  |        | conserved hypothetical protein                  | -1.90256   | 5.00E-05 | 0.00026  |
| PGN_2071  |        | probable ketopantoate reductase ApbA/PanE       | -0.522922  | 0.07625  | 0.13734  |
| PGN_2072  |        | ABC transporter ATP-binding protein             | 0.835645   | 0.0049   | 0.013873 |
| PGN_2073  |        | conserved hypothetical protein                  | -0.523137  | 0.10325  | 0.175155 |
| PGN_2074  |        | conserved hypothetical protein                  | -1.90547   | 5.00E-05 | 0.00026  |
| PGN_2075  | uvrAll | excinuclease ABC A subunit                      | -0.263999  | 0.3663   | 0.48408  |
| PGN_2076  |        | conserved hypothetical protein                  | -1.47924   | 5.00E-05 | 0.00026  |
| PGN_2077  |        | conserved hypothetical protein                  | -1.27607   | 0.00015  | 0.000685 |
| PGN_2078  |        | conserved hypothetical protein                  | -0.904871  | 0.00285  | 0.008718 |
| PGN_2079  |        | mannose-1-phosphate guanylyltransferase         | -1.48373   | 5.00E-05 | 0.00026  |
| PGN_2080  |        | conserved hypothetical protein                  | 1.6173     | 5.00E-05 | 0.00026  |
| PGN_2081  |        | 1-deoxy-D-xylulose 5-phosphate synthase         | -0.854683  | 0.0058   | 0.016016 |
| PGN_2082  | trkA   | putative potassium uptake protein TrkA          | -0.876887  | 0.00335  | 0.009989 |
| PGN_2083  |        | potassium uptake protein TrkH                   | -0.36181   | 0.20835  | 0.313482 |
| PGN_2084  |        | conserved hypothetical protein                  | 0.283163   | 0.5796   | 0.684777 |
| PGN_2085  |        | putative Fe-S oxidoreductases                   | 0.195042   | 0.50125  | 0.61437  |
| PGN_2086  |        | probable acetyltransferase                      | 0.590962   | 0.03685  | 0.075947 |
| PGN_2087  |        | glycosyltransferase                             | -0.537377  | 0.05145  | 0.099489 |
| PGN_2088  |        | conserved hypothetical protein                  | -0.89121   | 0.00955  | 0.024526 |
| PGN_2089  |        | conserved hypothetical protein                  | -1.45412   | 0.00795  | 0.021104 |
| PGN_2090  | husB   | conserved hypothetical protein                  | -0.87859   | 0.03645  | 0.075269 |
| PGN_2091  | husA   | conserved hypothetical protein                  | -1.17726   | 0.00635  | 0.01731  |
| PGN_r0001 |        |                                                 | -0.108765  | 0.81385  | 0.87289  |
| PGN_r0002 |        |                                                 | -0.0690001 | 0.8346   | 0.886411 |
| PGN_r0003 |        |                                                 | -2.29177   | 0.02455  | 0.053828 |
| PGN_r0004 |        |                                                 | -0.100589  | 0.826    | 0.881923 |
| PGN_r0005 |        |                                                 | -0.0040235 | 0.99135  | 0.991816 |
| PGN_r0006 |        |                                                 | -1.7307    | 0.04315  | 0.086503 |
| PGN_r0007 |        |                                                 | -2.39873   | 0.01635  | 0.038506 |
| PGN_r0008 |        |                                                 | 0.0066057  | 0.98455  | 0.988314 |
| PGN_r0009 |        |                                                 | -0.566805  | 0.07155  | 0.130419 |
| PGN_r0010 |        |                                                 | -0.120924  | 0.794    | 0.858132 |
| PGN_r0011 |        |                                                 | -0.0250106 | 0.93715  | 0.956825 |
| PGN_r0012 |        |                                                 | -3.20771   | 0.0432   | 0.086522 |
| PGN_t0001 |        |                                                 | -1.86596   | 0.0911   | 0.158587 |
| PGN_t0002 |        |                                                 | -2.1311    | 5.00E-05 | 0.00026  |
| PGN_t0003 |        |                                                 | -0.788691  | 0.4074   | 0.523449 |
| PGN_t0004 |        |                                                 | -0.147257  | 0.6371   | 0.736366 |
| PGN_t0005 |        |                                                 | -0.374893  | 0.2315   | 0.339672 |
| PGN_t0006 |        |                                                 | -0.43351   | 0.4234   | 0.540743 |
| PGN_t0007 |        |                                                 | -2.43928   | 0.24845  | 0.360075 |
| PGN_t0008 |        |                                                 | 1.48797    | 0.067    | 0.123822 |
| PGN_t0009 |        |                                                 | 1.45239    | 5.00E-05 | 0.00026  |
| PGN_t0010 |        |                                                 | 1.10293    | 0.004    | 0.011666 |
| PGN_t0011 |        |                                                 | 1.14343    | 0.0124   | 0.030379 |
| PGN_t0012 |        |                                                 | -0.0195976 | 0.96465  | 0.974722 |
| PGN_t0013 |        |                                                 | 1.57891    | 5.00E-05 | 0.00026  |
| PGN_t0014 |        |                                                 | 1.34284    | 0.00075  | 0.002697 |
| PGN_t0015 |        |                                                 | 2.44261    | 0.0228   | 0.050935 |
| PGN_t0016 |        |                                                 | 1.39007    | 0.00535  | 0.014967 |
| PGN_t0017 |        |                                                 | -3.16436   | 5.00E-05 | 0.00026  |
| PGN_t0018 |        |                                                 | 0.914993   | 0.0059   | 0.016208 |
| PGN_t0019 |        |                                                 | 0.405231   | 0.44865  | 0.565193 |

|           |     |           |          |          |
|-----------|-----|-----------|----------|----------|
| PGN_t0020 |     | 0.405688  | 0.5448   | 0.65604  |
| PGN_t0021 |     | -0.640235 | 0.0516   | 0.099508 |
| PGN_t0022 |     | 0.137482  | 0.8396   | 0.890193 |
| PGN_t0023 |     | -2.34459  | 5.00E-05 | 0.00026  |
| PGN_t0024 |     | -1.3195   | 0.0932   | 0.161582 |
| PGN_t0025 |     | -1.14187  | 0.11585  | 0.192842 |
| PGN_t0026 |     | 1.34273   | 0.18585  | 0.285274 |
| PGN_t0027 |     | 1.05158   | 0.24375  | 0.354228 |
| PGN_t0028 |     | 0.0343399 | 0.9327   | 0.955591 |
| PGN_t0029 |     | -0.133127 | 0.7022   | 0.792254 |
| PGN_t0030 |     | -0.103179 | 0.7616   | 0.836228 |
| PGN_t0031 | inf |           | 0.3628   | 0.481345 |
| PGN_t0032 |     | -0.69549  | 0.01435  | 0.034404 |
| PGN_t0033 |     | 1.03817   | 0.27315  | 0.387716 |
| PGN_t0034 |     | 1.22578   | 0.02745  | 0.059452 |
| PGN_t0035 |     | 1.37489   | 0.0006   | 0.002241 |
| PGN_t0036 |     | 1.57244   | 5.00E-05 | 0.00026  |
| PGN_t0037 |     | -0.858642 | 0.2034   | 0.30712  |
| PGN_t0038 |     | 0.326414  | 0.5793   | 0.684777 |
| PGN_t0039 |     | 0.336563  | 0.24595  | 0.356912 |
| PGN_t0040 |     | -0.162555 | 0.55195  | 0.662149 |
| PGN_t0041 |     | -1.7043   | 0.00095  | 0.003316 |
| PGN_t0042 |     | -0.241236 | 0.464    | 0.57837  |
| PGN_t0043 |     | -0.36834  | 0.219    | 0.325289 |
| PGN_t0044 |     | -0.283399 | 0.30005  | 0.416703 |
| PGN_t0045 |     | -0.975927 | 0.01535  | 0.036433 |
| PGN_t0046 |     | -1.74059  | 0.00025  | 0.00108  |
| PGN_t0047 |     | 2.59636   | 0.00235  | 0.007347 |
| PGN_t0048 |     | 1.5537    | 5.00E-05 | 0.00026  |
| PGN_t0049 |     | 1.1889    | 0.00245  | 0.007615 |
| PGN_t0050 |     | -0.602885 | 0.063    | 0.117966 |
| PGN_t0051 |     | -0.785538 | 0.00675  | 0.018283 |
| PGN_t0052 |     | -0.851205 | 0.0046   | 0.013217 |
| PGN_t0053 |     | 0.803697  | 0.3641   | 0.48237  |

| Gene ID   | Gene Name | Product                                                     | log2 Fold Change | p-value  | q-value  |
|-----------|-----------|-------------------------------------------------------------|------------------|----------|----------|
| AB57_0001 | tyrS      | tyrosyl-tRNA synthetase                                     | 1.134754213      | 3.82E-12 | 3.25E-11 |
| AB57_0002 | anmK      | anhydro-N-acetylmuramic acid kinase                         | -0.506366168     | 3.35E-05 | 8.68E-05 |
| AB57_0003 |           | hydrolase                                                   | -0.620770596     | 5.26E-09 | 2.50E-08 |
| AB57_0004 |           | iron-sulfur cluster insertion protein ErpA                  | -0.169365265     | 0.15027  | 0.191526 |
| AB57_0005 |           | RND type efflux pump                                        | -1.154301227     | 2.76E-17 | 5.89E-16 |
| AB57_0006 |           | RND type efflux pump                                        | -0.917931555     | 9.98E-09 | 4.56E-08 |
| AB57_0007 |           | transposase subunit                                         | -0.721165651     | 3.24E-06 | 1.00E-05 |
| AB57_0008 |           | transposase 1                                               | -0.369727499     | 0.009139 | 0.015109 |
| AB57_0009 |           | beta-lactamase                                              | 1.779682641      | 3.10E-13 | 3.11E-12 |
| AB57_0010 |           | hypothetical protein                                        | 0.176823102      | 0.116001 | 0.151608 |
| AB57_0011 |           | transposase subunit                                         | -0.805782769     | 4.69E-07 | 1.67E-06 |
| AB57_0012 |           | transposase 1                                               | -0.358434474     | 0.013102 | 0.02095  |
| AB57_0013 |           | RND type efflux pump                                        | -0.219990112     | 0.075295 | 0.102878 |
| AB57_0014 |           | ABC transporter, ATP-binding protein                        | 1.301876895      | 7.07E-17 | 1.41E-15 |
| AB57_0015 |           | DedA family protein                                         | -0.054192635     | 0.623667 | 0.672172 |
| AB57_0016 |           | cytochrome b562                                             | -0.039908672     | 0.756418 | 0.792846 |
| AB57_0017 | gyrB      | DNA gyrase, B subunit                                       | 0.390735789      | 0.034284 | 0.050197 |
| AB57_0018 | recF      | recombination protein F                                     | 0.086388794      | 0.479127 | 0.539492 |
| AB57_0019 | dnaN      | DNA polymerase III, beta subunit                            | 0.830612846      | 1.79E-08 | 7.86E-08 |
| AB57_0020 | dnaA      | chromosomal replication initiation protein                  | 0.596231753      | 8.31E-06 | 2.39E-05 |
| AB57_0021 | rpmH      | 50S ribosomal protein L34                                   | 0.826582549      | 1.68E-06 | 5.51E-06 |
| AB57_0022 | rnpA      | ribonuclease P protein component                            | 1.368610705      | 5.91E-11 | 3.98E-10 |
| AB57_0023 |           | hypothetical protein                                        | 1.886098027      | 4.85E-17 | 9.87E-16 |
| AB57_0024 |           | putative inner membrane protein translocase component YidC  | 1.458295782      | 2.71E-11 | 1.95E-10 |
| AB57_0025 |           | probable tRNA modification GTPase TrmE                      | 1.416752971      | 3.58E-15 | 5.16E-14 |
| AB57_0026 | trmE      | tRNA modification GTPase TrmE                               | 1.038053657      | 1.09E-12 | 1.02E-11 |
| AB57_0027 |           | hypothetical protein                                        | -0.318944927     | 0.00666  | 0.011339 |
| AB57_0028 |           | cation diffusion facilitator family transporter             | 0.117193264      | 0.39885  | 0.459447 |
| AB57_0029 |           | thiol:disulfide interchange protein DsbC                    | -0.583631911     | 1.63E-08 | 7.22E-08 |
| AB57_0030 |           | transglycosylase-associated protein                         | -1.128605061     | 3.56E-12 | 3.04E-11 |
| AB57_0031 | hpt       | hypoxanthine phosphoribosyltransferase                      | 0.916708235      | 2.07E-10 | 1.27E-09 |
| AB57_0032 |           | hypothetical protein                                        | 0.46718453       | 0.011905 | 0.019211 |
| AB57_0033 | guaD      | guanine deaminase                                           | 0.648911436      | 1.63E-07 | 6.19E-07 |
| AB57_0034 |           | rieske protein                                              | -0.357595963     | 0.022979 | 0.034917 |
| AB57_0035 |           | glutathionylspermidine synthase                             | 0.72792576       | 6.41E-08 | 2.60E-07 |
| AB57_0036 |           | lipoprotein, putative                                       | 0.169210229      | 0.352018 | 0.411652 |
| AB57_0037 |           | integral membrane protein TerC                              | 0.29525729       | 0.010169 | 0.016619 |
| AB57_0038 |           | PAP2 superfamily protein                                    | 0.133752234      | 0.266728 | 0.323359 |
| AB57_0039 | ltrA      | low temperature requirement protein LtrA                    | -0.568631447     | 6.20E-08 | 2.52E-07 |
| AB57_0040 | mpl       | UDP-N-acetylmuramate:L-alanyl-gamma-D-glutamyl-meso-diam    | 0.703738499      | 2.08E-09 | 1.08E-08 |
| AB57_0041 |           | transmembrane signal peptide protein                        | -0.171732201     | 0.124195 | 0.161462 |
| AB57_0042 | purE      | phosphoribosylaminoimidazole carboxylase, catalytic subunit | 1.566439118      | 1.25E-16 | 2.38E-15 |
| AB57_0043 | purK      | phosphoribosylaminoimidazole carboxylase, ATPase subunit    | 1.477993236      | 1.75E-10 | 1.09E-09 |
| AB57_0044 |           | transglycolase                                              | 0.104083923      | 0.395748 | 0.456159 |
| AB57_0045 |           | hypothetical protein                                        | -0.333066186     | 0.009757 | 0.016045 |
| AB57_0046 |           | matrixin superfamily                                        | 0.427294174      | 0.005164 | 0.009009 |
| AB57_0047 |           | matrixin superfamily                                        | -0.265632608     | 0.033186 | 0.048783 |
| AB57_0048 | dnaK      | molecular chaperone DnaK                                    | 0.307398574      | 0.092038 | 0.123246 |
| AB57_0049 | grpE      | co-chaperone GrpE                                           | -0.31781467      | 0.03188  | 0.047086 |
| AB57_0050 |           | putative transcriptional regulator                          | -0.108475126     | 0.553323 | 0.610359 |
| AB57_0051 |           | metallo-beta-lactamase family protein                       | -0.727775654     | 1.63E-09 | 8.65E-09 |
| AB57_0052 |           | lipoprotein, putative                                       | -0.514472202     | 0.000204 | 0.000459 |
| AB57_0053 |           | lipoprotein, putative                                       | -1.058470967     | 1.31E-20 | 4.80E-19 |
| AB57_0054 |           | esterase                                                    | -0.73132608      | 6.87E-10 | 3.89E-09 |
| AB57_0055 |           | peptidyl-prolyl cis-trans isomerase                         | -0.095907746     | 0.413272 | 0.474289 |
| AB57_0057 |           | hypothetical protein                                        | -0.671615691     | 4.74E-11 | 3.26E-10 |
| AB57_0058 |           | putative flavoprotein                                       | -0.35152073      | 0.008006 | 0.013427 |

|           |      |                                                              |              |          |          |
|-----------|------|--------------------------------------------------------------|--------------|----------|----------|
| AB57_0059 |      | peptidylprolyl isomerase, fkbp-type                          | 1.01288012   | 2.44E-17 | 5.28E-16 |
| AB57_0060 | lspA | lipoprotein signal peptidase                                 | 0.690624951  | 1.07E-07 | 4.21E-07 |
| AB57_0061 | ileS | isoleucyl-tRNA synthetase                                    | 0.898299984  | 3.04E-06 | 9.46E-06 |
| AB57_0062 | ribF | riboflavin biosynthesis protein RibF                         | 0.292097451  | 0.008688 | 0.014466 |
| AB57_0063 |      | C4-dicarboxylate transporter/malic acid transport protein    | -0.439112318 | 6.05E-05 | 0.000149 |
| AB57_0064 |      | putative MTA/SAH nucleosidase                                | -0.540504252 | 5.68E-07 | 1.99E-06 |
| AB57_0065 |      | transcriptional regulator, TetR family                       | -0.001786068 | 0.986606 | 0.988476 |
| AB57_0066 |      | aliphatic sulfonates import ATP-binding protein SsuB         | 0.929777341  | 3.41E-11 | 2.42E-10 |
| AB57_0067 |      | aliphatic sulfonates transport permease protein SsuC         | 0.110128466  | 0.455166 | 0.51565  |
| AB57_0068 |      | alkanesulfonate monooxygenase                                | -0.706795177 | 6.29E-06 | 1.85E-05 |
| AB57_0069 |      | aliphatic sulfonates-binding protein                         | -1.490849575 | 0.000259 | 0.000571 |
| AB57_0070 |      | aliphatic sulfonates-binding protein                         | -1.784574643 | 7.42E-06 | 2.16E-05 |
| AB57_0071 | argA | N-acetylglutamate synthase                                   | -0.178208077 | 0.083335 | 0.11278  |
| AB57_0072 |      | hypothetical protein                                         | -1.48611507  | 4.15E-35 | 1.18E-32 |
| AB57_0073 |      | hypothetical protein                                         | -0.586810812 | 1.03E-08 | 4.68E-08 |
| AB57_0074 |      | short chain dehydrogenase                                    | -0.650723032 | 5.22E-07 | 1.84E-06 |
| AB57_0075 |      | phosphoglycolate phosphatase 2                               | 0.164757168  | 0.105031 | 0.13884  |
| AB57_0076 | ubiG | 3-demethylubiquinone-9 3-methyltransferase                   | 0.103235967  | 0.319405 | 0.378297 |
| AB57_0077 |      | thiol:disulfide interchange protein DsbA                     | 0.069677824  | 0.578594 | 0.632997 |
| AB57_0078 |      | transcriptional regulator, TetR family                       | -0.463913899 | 3.42E-05 | 8.85E-05 |
| AB57_0079 |      | transcriptional regulator, TetR family                       | 0.265996352  | 0.013963 | 0.022169 |
| AB57_0080 |      | putative oxidoreductase                                      | 1.533176254  | 2.06E-40 | 9.53E-38 |
| AB57_0081 |      | fatty acid desaturase                                        | 0.802544252  | 1.96E-11 | 1.45E-10 |
| AB57_0082 | rph  | ribonuclease PH                                              | 1.411958774  | 1.05E-20 | 3.92E-19 |
| AB57_0084 |      | phospholipase C, phosphocholine-specific                     | -0.358349351 | 0.004018 | 0.00714  |
| AB57_0085 | nadC | nicotinate-nucleotide diphosphorylase                        | 1.216136387  | 7.42E-24 | 4.57E-22 |
| AB57_0086 |      | hypothetical protein                                         | 0.085596148  | 0.609911 | 0.660425 |
| AB57_0087 |      | N-acetyl-anhydromuranmyl-L-alanine amidase                   | -0.21227742  | 0.106303 | 0.140317 |
| AB57_0088 | mviN | integral membrane protein MviN                               | 0.95492806   | 4.41E-11 | 3.06E-10 |
| AB57_0089 | fkIB | immunoreactive 21 kD antigen PG10                            | -0.224631394 | 0.042483 | 0.060997 |
| AB57_0090 |      | peptidyl-prolyl cis-trans isomerase Mip                      | 0.081337436  | 0.485739 | 0.545609 |
| AB57_0091 |      | tyrosine-protein kinase ptk                                  | 0.909877266  | 8.23E-07 | 2.82E-06 |
| AB57_0092 |      | protein-tyrosine-phosphatase ptp                             | 0.719250208  | 4.50E-09 | 2.19E-08 |
| AB57_0093 |      | polysaccharide export protein                                | 0.543584357  | 0.000253 | 0.000559 |
| AB57_0094 |      | VI polysaccharide biosynthesis protein VipA/tviB             | 1.358791243  | 3.83E-14 | 4.48E-13 |
| AB57_0095 |      | VI polysaccharide biosynthesis protein VipB/tviC             | 1.349661255  | 1.55E-11 | 1.17E-10 |
| AB57_0096 |      | polysaccharide biosynthesis protein                          | 0.084785797  | 0.575477 | 0.629774 |
| AB57_0097 |      | hypothetical protein                                         | 0.542644084  | 0.001659 | 0.003173 |
| AB57_0098 |      | hypothetical protein                                         | -0.194975984 | 0.153753 | 0.195695 |
| AB57_0099 |      | glycosyl transferase, group 1                                | -0.354191708 | 0.030943 | 0.045905 |
| AB57_0100 |      | hypothetical protein                                         | -0.316337565 | 0.014224 | 0.022529 |
| AB57_0101 |      | hypothetical protein                                         | -0.476855072 | 8.88E-05 | 0.000213 |
| AB57_0102 |      | putative glycosyl transferase family 1                       | 0.327795918  | 0.005545 | 0.0096   |
| AB57_0103 |      | glycosyl transferase, group 1                                | -0.069224548 | 0.639686 | 0.68676  |
| AB57_0104 |      | UDP-glucose 4-epimerase                                      | 0.524308684  | 1.66E-05 | 4.53E-05 |
| AB57_0105 |      | polyprenol phosphate:N-acetyl-hexosamine 1-phosphate transfi | 0.951933252  | 8.44E-10 | 4.70E-09 |
| AB57_0106 |      | acetyltransferase                                            | 0.34510268   | 0.002985 | 0.005426 |
| AB57_0107 |      | nucleotide sugar epimerase/dehydratase                       | 0.460675346  | 0.00264  | 0.004847 |
| AB57_0108 | galE | UDP-glucose 4-epimerase                                      | 0.721101154  | 2.25E-09 | 1.16E-08 |
| AB57_0109 |      | hypothetical protein                                         | -0.454567973 | 1.06E-05 | 2.98E-05 |
| AB57_0110 |      | acyltransferase                                              | -0.271856448 | 0.061728 | 0.085894 |
| AB57_0111 | galU | UTP-glucose-1-phosphate uridylyltransferase                  | -0.149833442 | 0.223146 | 0.275306 |
| AB57_0112 |      | NDP-sugar dehydrogenase                                      | -0.139511969 | 0.404906 | 0.4657   |
| AB57_0113 | pgi  | glucose-6-phosphate isomerase                                | 0.181159698  | 0.098188 | 0.1304   |
| AB57_0114 | galE | UDP-glucose 4-epimerase                                      | 0.149769961  | 0.206212 | 0.256207 |
| AB57_0115 |      | phosphomannomutase                                           | 0.415703552  | 0.000306 | 0.000663 |
| AB57_0116 |      | L-lactate permease                                           | 0.6755914    | 9.25E-11 | 6.03E-10 |
| AB57_0117 |      | DNA-binding transcriptional repressor LldR                   | 0.522537814  | 1.34E-05 | 3.71E-05 |

|           |      |                                              |              |          |          |
|-----------|------|----------------------------------------------|--------------|----------|----------|
| AB57_0118 |      | L-lactate dehydrogenase                      | 0.443701647  | 6.50E-05 | 0.000159 |
| AB57_0119 |      | D-lactate dehydrogenase                      | 0.315380525  | 0.004944 | 0.008641 |
| AB57_0120 | araT | aromatic amino acid aminotransferase         | 0.587047151  | 0.00032  | 0.000692 |
| AB57_0121 |      | transcriptional regulator, GntR family       | 0.992581887  | 5.15E-06 | 1.54E-05 |
| AB57_0122 | prpB | 2-methylisocitrate lyase                     | 1.648610564  | 4.26E-48 | 3.94E-45 |
| AB57_0123 |      | methylcitrate synthase                       | 0.940815947  | 2.63E-13 | 2.70E-12 |
| AB57_0124 | acnD | aconitate hydratase                          | 0.645291069  | 1.70E-05 | 4.62E-05 |
| AB57_0125 |      | hypothetical protein                         | -0.633997366 | 3.62E-07 | 1.31E-06 |
| AB57_0126 |      | hypothetical protein                         | -0.368787342 | 0.001184 | 0.00232  |
| AB57_0127 |      | probable transposase (ISN1)                  | -0.558663834 | 0.000512 | 0.001069 |
| AB57_0128 |      | hypothetical protein                         | -0.457360938 | 0.031891 | 0.047086 |
| AB57_0129 |      | transposase, Mutator family                  | -0.298099668 | 0.016448 | 0.02569  |
| AB57_0130 |      | short-chain dehydrogenase/reductase SDR      | -0.299031409 | 0.03133  | 0.046394 |
| AB57_0131 |      | hypothetical protein                         | -0.847293213 | 1.46E-07 | 5.57E-07 |
| AB57_0132 |      | dual specificity pseudouridine synthase      | 0.947309557  | 6.14E-11 | 4.12E-10 |
| AB57_0133 |      | hypothetical protein                         | -0.753555201 | 2.32E-10 | 1.40E-09 |
| AB57_0134 |      | hypothetical protein                         | -0.411965579 | 0.000149 | 0.000343 |
| AB57_0135 |      | TonB-dependent siderophore receptor          | -0.200008422 | 0.073709 | 0.100785 |
| AB57_0136 |      | hypothetical protein                         | -0.322057744 | 0.024908 | 0.037616 |
| AB57_0137 |      | leucine-responsive regulatory protein        | 0.051742489  | 0.766994 | 0.80234  |
| AB57_0138 |      | D-amino acid dehydrogenase small subunit     | 0.485647683  | 0.000142 | 0.000329 |
| AB57_0139 | dadX | alanine racemase                             | 0.014195574  | 0.889498 | 0.909909 |
| AB57_0140 |      | endoribonuclease L-PSP family protein        | -0.185315632 | 0.148    | 0.188892 |
| AB57_0141 |      | D-serine/D-alanine/glycine transporter       | -0.283661197 | 0.064395 | 0.089169 |
| AB57_0142 |      | D-serine/D-alanine/glycine transporter       | -0.134290589 | 0.368293 | 0.428113 |
| AB57_0143 |      | transcriptional regulator, LysR family       | -0.63711057  | 8.56E-05 | 0.000206 |
| AB57_0144 | mmsA | methylmalonate-semialdehyde dehydrogenase    | -0.225073382 | 0.098243 | 0.130427 |
| AB57_0145 | mmsB | 3-hydroxyisobutyrate dehydrogenase           | -0.015420239 | 0.889444 | 0.909909 |
| AB57_0146 |      | acetyl-coenzyme A synthetase                 | -0.023013591 | 0.848409 | 0.875137 |
| AB57_0147 |      | acyl-CoA dehydrogenase                       | 0.494277057  | 1.76E-05 | 4.75E-05 |
| AB57_0148 |      | short-chain enoyl-CoA hydratase              | 0.816398997  | 1.60E-12 | 1.44E-11 |
| AB57_0149 |      | enoyl-CoA hydratase/isomerase family protein | 0.534048264  | 1.29E-07 | 4.97E-07 |
| AB57_0150 |      | shikimate transporter                        | 0.005810404  | 0.955127 | 0.964692 |
| AB57_0151 |      | homoserine lactone synthase                  | -0.461615336 | 0.059002 | 0.082412 |
| AB57_0152 |      | hypothetical protein                         | -0.609977226 | 0.021113 | 0.032387 |
| AB57_0153 |      | eR transcriptional regulator                 | -0.463224342 | 0.024379 | 0.036888 |
| AB57_0154 |      | acyl-CoA synthetase/AMP-acid ligase          | -0.172703272 | 0.258273 | 0.314449 |
| AB57_0155 |      | acyl-CoA dehydrogenase                       | -0.114123103 | 0.475781 | 0.53605  |
| AB57_0156 |      | acyl carrier protein                         | -0.63614359  | 0.008923 | 0.014805 |
| AB57_0157 |      | amino acid adenylation                       | -0.047407664 | 0.687579 | 0.730417 |
| AB57_0158 |      | polyketide cyclase/dehydrase family          | -0.134636233 | 0.2674   | 0.323962 |
| AB57_0159 |      | hypothetical protein                         | -0.330026062 | 0.006317 | 0.010821 |
| AB57_0160 |      | NAD dependent epimerase/dehydratase family   | -0.276177568 | 0.01088  | 0.017679 |
| AB57_0161 |      | phosphopantetheine-protein transferase       | -0.49628954  | 7.25E-05 | 0.000176 |
| AB57_0162 |      | BolA family protein                          | 0.057400264  | 0.655254 | 0.700908 |
| AB57_0163 |      | hypothetical protein                         | -0.071966241 | 0.536523 | 0.593997 |
| AB57_0164 |      | ParA family protein                          | 0.11223997   | 0.256089 | 0.312304 |
| AB57_0165 |      | hypothetical protein                         | -0.57791667  | 2.55E-08 | 1.10E-07 |
| AB57_0166 |      | hypothetical protein                         | -0.723344085 | 5.76E-09 | 2.73E-08 |
| AB57_0167 |      | protein DedA                                 | -0.884150541 | 9.48E-11 | 6.17E-10 |
| AB57_0168 |      | DoxX family protein                          | -0.629849303 | 1.43E-06 | 4.76E-06 |
| AB57_0169 |      | hypothetical protein                         | 0.263771688  | 0.028639 | 0.042749 |
| AB57_0170 |      | GMP synthase                                 | 2.081226659  | 1.07E-17 | 2.47E-16 |
| AB57_0171 |      | putative adenylyltransferase                 | -1.125255074 | 4.79E-19 | 1.36E-17 |
| AB57_0172 |      | putative transcriptional regulator           | 0.130624075  | 0.596804 | 0.648891 |
| AB57_0173 |      | hypothetical protein                         | 0.336330299  | 0.085839 | 0.115577 |
| AB57_0174 |      | pirin domain protein                         | -0.248355849 | 0.092153 | 0.123315 |
| AB57_0175 |      | OsmC family protein                          | 0.273269618  | 0.024056 | 0.036449 |

|           |      |                                              |              |          |          |
|-----------|------|----------------------------------------------|--------------|----------|----------|
| AB57_0176 |      | glutathione S-transferase                    | -0.56304975  | 0.000155 | 0.000356 |
| AB57_0177 |      | hypothetical protein                         | 0.467332267  | 7.49E-06 | 2.18E-05 |
| AB57_0178 | argS | arginyl-tRNA synthetase                      | 0.771747976  | 1.54E-05 | 4.21E-05 |
| AB57_0179 |      | malate dehydrogenase                         | 0.108381384  | 0.481159 | 0.541286 |
| AB57_0180 |      | melanin biosynthesis protein TyrA            | 0.367651019  | 0.000623 | 0.001281 |
| AB57_0181 |      | homoserine/homoserine lactone efflux protein | -0.514551348 | 1.20E-06 | 4.02E-06 |
| AB57_0182 |      | high affinity Zn transport protein           | 0.730264996  | 2.03E-09 | 1.06E-08 |
| AB57_0183 |      | zinc import ATP-binding protein ZnuC         | 0.168628158  | 0.132472 | 0.171081 |
| AB57_0184 |      | transcriptional regulator, Fur family        | -0.065430196 | 0.528141 | 0.585943 |
| AB57_0185 |      | high affinity Zn transport protein           | 0.642666378  | 3.07E-08 | 1.30E-07 |
| AB57_0186 | atpI | ATP synthase FO, I subunit                   | 0.700974297  | 1.77E-07 | 6.67E-07 |
| AB57_0187 | atpB | FOF1 ATP synthase subunit A                  | 1.667335204  | 6.40E-15 | 8.94E-14 |
| AB57_0188 | atpE | ATP synthase FO, C subunit                   | 1.614933495  | 1.04E-11 | 8.12E-11 |
| AB57_0189 | atpF | FOF1 ATP synthase subunit B                  | 1.854800068  | 2.14E-15 | 3.25E-14 |
| AB57_0190 | atpH | FOF1 ATP synthase subunit delta              | 1.942890025  | 7.26E-17 | 1.44E-15 |
| AB57_0191 | atpA | FOF1 ATP synthase subunit alpha              | 0.963547686  | 1.64E-06 | 5.38E-06 |
| AB57_0192 | atpG | FOF1 ATP synthase subunit gamma              | 0.79397996   | 2.46E-05 | 6.53E-05 |
| AB57_0193 | atpD | FOF1 ATP synthase subunit beta               | 0.50330372   | 0.005253 | 0.009142 |
| AB57_0194 | atpC | FOF1 ATP synthase subunit epsilon            | 0.610414076  | 0.001104 | 0.002177 |
| AB57_0195 |      | lipoprotein, putative                        | -0.169254038 | 0.119303 | 0.15562  |
| AB57_0196 |      | glutathione peroxidase                       | 0.350106691  | 0.001121 | 0.002207 |
| AB57_0197 |      | transcriptional regulator AraC family        | -0.638652147 | 1.37E-07 | 5.25E-07 |
| AB57_0198 |      | major facilitator superfamily MFS_1          | -0.52626606  | 3.20E-05 | 8.34E-05 |
| AB57_0199 |      | transcriptional regulator, TetR family       | -0.752395159 | 3.68E-06 | 1.13E-05 |
| AB57_0200 |      | transporter, drug/metabolite exporter family | 0.033588241  | 0.749761 | 0.787202 |
| AB57_0201 |      | protein YrdC                                 | -0.10795814  | 0.380139 | 0.440174 |
| AB57_0202 |      | DNA protecting protein DprA                  | -0.052365937 | 0.717067 | 0.758042 |
| AB57_0203 |      | peptidoglycan-binding LysM                   | 0.068761004  | 0.612389 | 0.662139 |
| AB57_0204 | def  | peptide deformylase                          | 0.115632151  | 0.456885 | 0.517282 |
| AB57_0205 |      | hypothetical protein                         | 1.266528696  | 3.13E-12 | 2.71E-11 |
| AB57_0206 |      | TonB-dependent copper receptor               | 1.845451244  | 1.21E-13 | 1.29E-12 |
| AB57_0207 |      | hypothetical protein                         | 0.470634427  | 0.001793 | 0.003415 |
| AB57_0208 |      | hypothetical protein                         | -0.07790362  | 0.619142 | 0.668074 |
| AB57_0209 |      | putative transcription regulator protein     | -0.690957244 | 0.00551  | 0.009553 |
| AB57_0212 |      | putative acetyltransferase                   | 0.736391793  | 2.53E-09 | 1.29E-08 |
| AB57_0213 | cysK | cysteine synthase A                          | 0.367009342  | 0.008017 | 0.013441 |
| AB57_0214 |      | transglycosylase SLT domain protein          | -0.252840168 | 0.024501 | 0.037047 |
| AB57_0215 |      | NADPH-dependent fmn reductase                | -0.16095675  | 0.182726 | 0.229962 |
| AB57_0216 |      | hypothetical protein                         | -0.273191003 | 0.045191 | 0.064385 |
| AB57_0217 |      | transcriptional regulator SoxR-family        | -0.243206349 | 0.065495 | 0.090625 |
| AB57_0218 |      | glycerophosphoryl diester phosphodiesterase  | 0.056496293  | 0.660062 | 0.705235 |
| AB57_0219 |      | hypothetical protein                         | -0.619219596 | 0.000696 | 0.001422 |
| AB57_0220 |      | hypothetical protein                         | 1.641539101  | 8.32E-12 | 6.66E-11 |
| AB57_0221 |      | hypothetical protein                         | -1.445784932 | 8.72E-18 | 2.05E-16 |
| AB57_0222 |      | hypothetical protein                         | -0.165929944 | 0.286784 | 0.344625 |
| AB57_0223 |      | DNA polymerase IV                            | -0.101999247 | 0.383777 | 0.444019 |
| AB57_0226 |      | inner membrane transport protein YieO        | -0.608764758 | 1.68E-08 | 7.42E-08 |
| AB57_0227 |      | hypothetical protein                         | -0.573205177 | 4.45E-06 | 1.35E-05 |
| AB57_0228 |      | protein YegH                                 | -0.327806495 | 0.019436 | 0.029976 |
| AB57_0229 |      | hypothetical protein                         | 0.351851105  | 0.015013 | 0.023628 |
| AB57_0230 |      | hypothetical protein                         | -0.268951516 | 0.015589 | 0.024399 |
| AB57_0231 |      | major facilitator superfamily MFS_1          | -0.510476032 | 3.36E-07 | 1.21E-06 |
| AB57_0232 | parC | DNA topoisomerase IV subunit A               | 0.313482487  | 0.009794 | 0.016092 |
| AB57_0233 |      | long-chain-fatty-acid--CoA ligase            | 0.831900337  | 3.22E-06 | 9.99E-06 |
| AB57_0234 |      | hypothetical protein                         | 0.004765427  | 0.965838 | 0.972673 |
| AB57_0235 |      | hypothetical protein                         | 0.131322486  | 0.26576  | 0.322398 |
| AB57_0236 | ppa  | inorganic pyrophosphatase                    | 1.628363649  | 2.45E-25 | 2.06E-23 |
| AB57_0237 |      | outer membrane protein OprE3                 | -0.089791994 | 0.584105 | 0.637314 |



|           |      |                                                             |              |          |          |
|-----------|------|-------------------------------------------------------------|--------------|----------|----------|
| AB57_0239 |      | hypothetical protein                                        | -0.741109457 | 6.80E-08 | 2.75E-07 |
| AB57_0240 |      | putative dihydrodipicolinate synthase                       | -0.200849593 | 0.195637 | 0.244382 |
| AB57_0241 |      | class II aldolase/adducin domain protein                    | -0.64752669  | 9.87E-06 | 2.79E-05 |
| AB57_0242 |      | transcriptional regulator, GntR family                      | -0.268474592 | 0.044505 | 0.063506 |
| AB57_0243 |      | competence protein ComM                                     | -0.11025855  | 0.487431 | 0.547113 |
| AB57_0244 |      | transposase protein A                                       | -0.074189695 | 0.52085  | 0.579418 |
| AB57_0245 |      | transposition protein B                                     | 0.072738804  | 0.522547 | 0.581131 |
| AB57_0246 |      | transposition helper protein C                              | -0.102559315 | 0.37589  | 0.436045 |
| AB57_0247 |      | hypothetical protein                                        | -0.4008538   | 0.002563 | 0.004721 |
| AB57_0248 |      | hypothetical protein                                        | -0.72214077  | 1.30E-07 | 5.00E-07 |
| AB57_0249 |      | FAD-dependent pyridine nucleotide-disulphide oxidoreductase | -0.344265236 | 0.001145 | 0.002251 |
| AB57_0250 | trxB | thioredoxin-disulfide reductase                             | 0.255845517  | 0.019494 | 0.030053 |
| AB57_0251 | arsH | arsenical resistance protein ArsH                           | 0.090211883  | 0.483394 | 0.543469 |
| AB57_0252 | arsB | arsenical-resistance protein                                | 0.017194214  | 0.883898 | 0.905433 |
| AB57_0253 |      | arsenate reductase                                          | 0.492254978  | 0.003245 | 0.005871 |
| AB57_0254 |      | arsenical resistance operon repressor                       | 0.834938527  | 0.004491 | 0.007928 |
| AB57_0255 | arsC | arsenate reductase                                          | 0.922647273  | 0.001442 | 0.002778 |
| AB57_0256 |      | universal stress protein                                    | -0.022220045 | 0.892245 | 0.912215 |
| AB57_0257 |      | ISPpu12 hypothetical protein                                | -0.233805098 | 0.025937 | 0.038995 |
| AB57_0258 |      | ISPpu12 hypothetical protein                                | -0.166217352 | 0.367878 | 0.427765 |
| AB57_0259 | lspA | lipoprotein signal peptidase                                | -0.133328884 | 0.214392 | 0.265301 |
| AB57_0260 |      | ISPpu12 transposase                                         | 0.021065985  | 0.841376 | 0.86885  |
| AB57_0261 |      | hypothetical protein                                        | 0.16078835   | 0.156584 | 0.199115 |
| AB57_0262 | topA | DNA topoisomerase I                                         | 0.553575741  | 2.32E-06 | 7.36E-06 |
| AB57_0263 |      | Ssb protein                                                 | 0.503207905  | 0.010413 | 0.016973 |
| AB57_0264 |      | hypothetical protein                                        | -0.148195902 | 0.343978 | 0.404307 |
| AB57_0265 | folP | dihydropteroate synthase                                    | -0.072349209 | 0.633748 | 0.680658 |
| AB57_0266 |      | NTP-binding protein                                         | 0.364340109  | 0.014322 | 0.022646 |
| AB57_0267 |      | hypothetical protein                                        | 0.156222546  | 0.310831 | 0.369467 |
| AB57_0268 |      | insertion sequence IS6100                                   | 0.565907983  | 0.00069  | 0.00141  |
| AB57_0269 |      | hypothetical protein                                        | 0.56350379   | 9.16E-06 | 2.61E-05 |
| AB57_0270 |      | hypothetical protein                                        | 1.076365244  | 6.71E-14 | 7.41E-13 |
| AB57_0271 | merA | putative mercuric reductase                                 | 0.931672846  | 2.89E-09 | 1.46E-08 |
| AB57_0272 |      | putative mercury transport protein MerC                     | 0.754504835  | 3.24E-11 | 2.31E-10 |
| AB57_0273 | tetR | tetracycline repressor protein, class A                     | -0.215745558 | 0.088993 | 0.119519 |
| AB57_0274 |      | hypothetical protein                                        | 0.636662962  | 0.000157 | 0.00036  |
| AB57_0275 | tetA | tetracycline resistance protein, class A                    | 0.577228283  | 3.49E-08 | 1.47E-07 |
| AB57_0276 |      | regulator protein PecM                                      | 0.580641521  | 8.51E-07 | 2.90E-06 |
| AB57_0277 |      | hypothetical protein                                        | 0.560443429  | 0.00053  | 0.001103 |
| AB57_0278 |      | isochorismatase hydrolase                                   | 0.797656573  | 4.22E-08 | 1.75E-07 |
| AB57_0279 |      | transposase ISSod9                                          | 0.180761558  | 0.24722  | 0.302449 |
| AB57_0280 | cat  | chloramphenicol acetyltransferase                           | -0.307517132 | 0.032482 | 0.047844 |
| AB57_0281 |      | transposase Tn3                                             | 0.012973362  | 0.913692 | 0.929775 |
| AB57_0282 |      | transposon Tn3 resolvase                                    | 0.08717361   | 0.425638 | 0.48697  |
| AB57_0283 |      | beta-lactamase TEM                                          | 0.068086242  | 0.676073 | 0.719847 |
| AB57_0284 |      | transposase InsB3 for insertion sequence IS26               | 0.133086089  | 0.23839  | 0.292842 |
| AB57_0285 |      | transposase IS26                                            | 0.40148112   | 0.000956 | 0.001907 |
| AB57_0286 |      | resolvase IS26                                              | -0.395224153 | 0.024973 | 0.037668 |
| AB57_0287 |      | transposase S26                                             | 0.109617305  | 0.282812 | 0.340405 |
| AB57_0288 |      | aminoglycoside 3'-phosphotransferase aphA1                  | -0.475578942 | 0.001866 | 0.003547 |
| AB57_0289 |      | transposase InsB3 for insertion sequence IS26               | 0.114337238  | 0.288705 | 0.346483 |
| AB57_0290 |      | IntI1 integrase                                             | -0.38072282  | 0.007352 | 0.012416 |
| AB57_0291 |      | aminoglycoside N(3')-acetyltransferase I aacC1              | -0.342375622 | 0.032054 | 0.047307 |
| AB57_0292 |      | acetyltransferase, gnat family                              | 0.003021093  | 0.984429 | 0.987062 |
| AB57_0293 |      | aminoglycoside resistance protein                           | 0.61310553   | 1.38E-05 | 3.80E-05 |
| AB57_0294 | folP | dihydropteroate synthase                                    | -0.064090516 | 0.680593 | 0.723411 |
| AB57_0295 |      | acetyltransferase, gnat family                              | 0.205959559  | 0.183407 | 0.230739 |
| AB57_0296 |      | hypothetical protein                                        | 0.539246033  | 2.01E-05 | 5.39E-05 |

|           |      |                                                      |              |          |          |
|-----------|------|------------------------------------------------------|--------------|----------|----------|
| AB57_0297 |      | invertase/recombinase protein                        | 0.875582785  | 1.21E-11 | 9.29E-11 |
| AB57_0298 |      | transcriptional regulator                            | 0.57884374   | 4.53E-05 | 0.000114 |
| AB57_0299 |      | hypothetical protein ISPpu12                         | 0.053176132  | 0.629705 | 0.677199 |
| AB57_0300 |      | hypothetical protein ISPpu12                         | -0.012058492 | 0.931619 | 0.944381 |
| AB57_0301 |      | heavy metal detoxification protein                   | -0.200198405 | 0.099614 | 0.132152 |
| AB57_0302 | lspA | lipoprotein signal peptidase                         | -0.063129531 | 0.559825 | 0.615923 |
| AB57_0303 |      | ISPpu12 transposase                                  | 0.047806749  | 0.642309 | 0.689052 |
| AB57_0304 |      | universal stress protein                             | -0.079095679 | 0.510041 | 0.569168 |
| AB57_0305 |      | sulfate permease                                     | 0.347304725  | 0.007181 | 0.012166 |
| AB57_0306 |      | hypothetical protein                                 | -0.408846662 | 0.00275  | 0.005034 |
| AB57_0307 |      | Mg chelatase-related protein                         | -0.177407302 | 0.193922 | 0.242649 |
| AB57_0308 |      | hypothetical protein                                 | -0.651691404 | 3.16E-10 | 1.88E-09 |
| AB57_0309 |      | nitrogen regulatory protein P-II                     | -0.595400792 | 4.50E-06 | 1.37E-05 |
| AB57_0310 | amt  | ammonium transporter                                 | -0.350307277 | 0.008151 | 0.01364  |
| AB57_0311 | nrdR | transcriptional regulator NrdR                       | 0.060301279  | 0.560777 | 0.616789 |
| AB57_0312 | ribD | riboflavin biosynthesis protein RibD                 | 0.333139687  | 0.002038 | 0.003838 |
| AB57_0313 |      | site-specific DNA-methyltransferase                  | 0.394170403  | 0.012013 | 0.019358 |
| AB57_0314 | ribE | riboflavin synthase subunit alpha                    | 0.107497181  | 0.396414 | 0.456784 |
| AB57_0315 |      | hypothetical protein                                 | 0.429223522  | 0.00265  | 0.004864 |
| AB57_0316 |      | hypothetical protein                                 | 0.004558115  | 0.968348 | 0.974405 |
| AB57_0317 |      | DNA polymerase III, chi subunit                      | 0.097781894  | 0.35199  | 0.411652 |
| AB57_0318 | pepA | leucyl aminopeptidase                                | 0.218644502  | 0.128239 | 0.166369 |
| AB57_0319 |      | permease YjgP/YjgQ family protein                    | 0.404207833  | 0.001236 | 0.002412 |
| AB57_0320 |      | permease YjgP/YjgQ family protein                    | 0.799747625  | 6.10E-08 | 2.49E-07 |
| AB57_0321 | gpml | phosphoglyceromutase                                 | 1.278575042  | 6.60E-11 | 4.40E-10 |
| AB57_0322 |      | putative periplasmic carboxyl-terminal protease      | 0.473106959  | 4.31E-05 | 0.000109 |
| AB57_0323 |      | type 4 fimbriae expression regulatory protein PilR   | -0.381866252 | 0.001421 | 0.002741 |
| AB57_0324 |      | sensor protein histidine kinase                      | -0.392486954 | 0.000231 | 0.000514 |
| AB57_0325 |      | response regulator                                   | -0.475038098 | 0.000144 | 0.000333 |
| AB57_0326 |      | D-alanyl-D-alanine carboxypeptidase family protein   | -0.629590095 | 0.000775 | 0.001573 |
| AB57_0327 | thrC | threonine synthase                                   | 1.599092229  | 2.37E-15 | 3.55E-14 |
| AB57_0328 |      | homoserine dehydrogenase                             | 0.827518823  | 4.20E-08 | 1.75E-07 |
| AB57_0329 |      | thiol:disulfide interchange protein                  | -0.114201667 | 0.253341 | 0.309156 |
| AB57_0330 | xerD | tyrosine recombinase XerD                            | 0.063334248  | 0.671115 | 0.715435 |
| AB57_0331 | feoA | putative ferrous iron transport protein A            | -0.634841317 | 2.74E-07 | 1.00E-06 |
| AB57_0332 | feoB | ferrous iron transport protein B                     | 0.646032305  | 0.000111 | 0.000261 |
| AB57_0333 |      | hypothetical protein                                 | 0.172424034  | 0.285612 | 0.343439 |
| AB57_0334 | murD | UDP-N-acetylmuramoyl-L-alanyl-D-glutamate synthetase | 0.693915053  | 7.89E-08 | 3.16E-07 |
| AB57_0335 | ftsW | cell division protein FtsW                           | 0.240326753  | 0.095657 | 0.127131 |
| AB57_0336 |      | glutamyl-tRNA synthetase                             | 0.730744671  | 1.55E-11 | 1.17E-10 |
| AB57_0337 |      | DnaK suppressor protein                              | 0.52161525   | 0.001328 | 0.002575 |
| AB57_0338 |      | cyclic AMP phosphodiesterase                         | -0.050156152 | 0.671155 | 0.715435 |
| AB57_0339 |      | ADP-ribose pyrophosphatase                           | -0.480308616 | 4.58E-05 | 0.000116 |
| AB57_0340 | thiC | thiamine biosynthesis protein ThiC                   | -0.254896405 | 0.035082 | 0.051245 |
| AB57_0341 |      | hypothetical protein                                 | -0.423633377 | 0.002037 | 0.003838 |
| AB57_0342 |      | transcriptional regulator                            | -0.481396101 | 1.67E-06 | 5.48E-06 |
| AB57_0343 |      | permease                                             | -0.649372861 | 1.38E-08 | 6.20E-08 |
| AB57_0344 |      | type I secretion outer membrane protein              | 0.062791045  | 0.582345 | 0.636348 |
| AB57_0345 | phoU | phosphate transport system regulatory protein PhoU   | 0.853881226  | 4.67E-09 | 2.26E-08 |
| AB57_0346 |      | hypothetical protein                                 | 1.774290392  | 6.66E-25 | 5.13E-23 |
| AB57_0347 | argH | argininosuccinate lyase                              | 1.14403795   | 3.67E-11 | 2.60E-10 |
| AB57_0348 |      | alginate biosynthesis protein                        | -0.739733182 | 8.61E-11 | 5.64E-10 |
| AB57_0349 |      | alginate biosynthesis regulatory protein             | -1.044230536 | 1.88E-07 | 7.08E-07 |
| AB57_0350 | hemC | porphobilinogen deaminase                            | 0.241942106  | 0.024386 | 0.036888 |
| AB57_0351 | hemD | uroporphyrinogen-III synthase                        | 0.482837705  | 1.25E-05 | 3.47E-05 |
| AB57_0352 |      | hypothetical protein                                 | 0.759374037  | 2.07E-11 | 1.52E-10 |
| AB57_0353 |      | hypothetical protein                                 | 0.973175909  | 1.33E-14 | 1.69E-13 |
| AB57_0354 |      | thioesterase superfamily protein                     | 0.57577461   | 1.48E-07 | 5.64E-07 |

|           |      |                                                               |              |          |          |
|-----------|------|---------------------------------------------------------------|--------------|----------|----------|
| AB57_0355 |      | DNA-binding protein H-NS                                      | -0.688072386 | 7.40E-06 | 2.16E-05 |
| AB57_0356 |      | putative general secretion pathway protein                    | 0.212643992  | 0.040345 | 0.058289 |
| AB57_0357 |      | putative general secretion pathway protein                    | 0.584419615  | 1.30E-08 | 5.87E-08 |
| AB57_0358 | gspD | general secretion pathway protein D                           | 0.51982433   | 0.000223 | 0.000499 |
| AB57_0359 |      | FHA domain protein                                            | 0.356734846  | 0.001318 | 0.002558 |
| AB57_0360 | gph  | phosphoglycolate phosphatase                                  | 0.290998672  | 0.006139 | 0.010537 |
| AB57_0361 | trpE | anthranilate synthase component I                             | 0.365649918  | 0.001938 | 0.003673 |
| AB57_0362 | tuf  | elongation factor Tu                                          | 0.793099398  | 8.09E-06 | 2.33E-05 |
| AB57_0363 | secE | preprotein translocase subunit SecE                           | 1.215942769  | 4.68E-12 | 3.90E-11 |
| AB57_0364 | nusG | transcription termination/antitermination factor NusG         | 1.404569221  | 1.71E-10 | 1.06E-09 |
| AB57_0365 | rplK | 50S ribosomal protein L11                                     | 1.38567338   | 4.26E-10 | 2.47E-09 |
| AB57_0366 | rplA | 50S ribosomal protein L1                                      | 1.303895353  | 8.07E-10 | 4.52E-09 |
| AB57_0367 |      | 50S ribosomal protein L10                                     | 1.350456249  | 1.17E-11 | 9.04E-11 |
| AB57_0368 | rplL | 50S ribosomal protein L7/L12                                  | 1.093255759  | 1.53E-08 | 6.84E-08 |
| AB57_0369 | rpoB | DNA-directed RNA polymerase subunit beta                      | 1.146689742  | 1.68E-08 | 7.39E-08 |
| AB57_0370 | rpoC | DNA-directed RNA polymerase subunit beta'                     | -0.036029679 | 0.820405 | 0.850757 |
| AB57_0371 |      | lipoprotein, putative                                         | -0.286675802 | 0.010016 | 0.01639  |
| AB57_0372 |      | hypothetical protein                                          | -1.106051455 | 2.55E-18 | 6.55E-17 |
| AB57_0373 |      | hypothetical protein                                          | -0.832274921 | 3.01E-10 | 1.79E-09 |
| AB57_0374 |      | short chain dehydrogenase                                     | -0.140420022 | 0.168387 | 0.213148 |
| AB57_0375 |      | Na <sup>+</sup> /H <sup>+</sup> antiporter NhaC               | 2.426049184  | 4.63E-19 | 1.34E-17 |
| AB57_0376 |      | putative outer membrane protein W                             | -0.765646403 | 9.76E-11 | 6.33E-10 |
| AB57_0377 |      | hypothetical protein                                          | -0.445756801 | 1.56E-05 | 4.26E-05 |
| AB57_0378 |      | heat shock protein 90                                         | -0.185254337 | 0.128825 | 0.167012 |
| AB57_0379 |      | hypothetical protein                                          | -0.60766591  | 0.000325 | 0.000701 |
| AB57_0380 |      | hypothetical protein                                          | -0.482993591 | 3.66E-05 | 9.43E-05 |
| AB57_0381 |      | DSBA oxidoreductase                                           | -0.183808662 | 0.113679 | 0.148942 |
| AB57_0382 |      | hypothetical protein                                          | -0.709001814 | 5.16E-10 | 2.96E-09 |
| AB57_0383 |      | transcriptional regulator MerR family                         | -0.319228636 | 0.069355 | 0.095395 |
| AB57_0384 |      | hypothetical protein                                          | -1.203722564 | 1.94E-21 | 8.43E-20 |
| AB57_0385 |      | hypothetical protein                                          | -0.857834513 | 2.69E-15 | 4.00E-14 |
| AB57_0386 | fadA | 3-ketoacyl-CoA thiolase                                       | 0.372866951  | 0.056962 | 0.079713 |
| AB57_0387 | fadB | multifunctional fatty acid oxidation complex subunit alpha    | 0.641863929  | 0.000197 | 0.000444 |
| AB57_0388 |      | lipoprotein, putative                                         | 0.299392271  | 0.019844 | 0.030555 |
| AB57_0389 |      | beta-hydroxylase                                              | 0.700985538  | 5.89E-11 | 3.97E-10 |
| AB57_0390 |      | hypothetical protein                                          | 0.451681018  | 0.000276 | 0.000605 |
| AB57_0391 | uvrC | excinuclease ABC subunit C                                    | -0.528831577 | 2.57E-07 | 9.44E-07 |
| AB57_0392 |      | acyl-CoA thioesterase II                                      | -0.706026237 | 2.36E-10 | 1.42E-09 |
| AB57_0393 | pgsA | CDP-diacylglycerol-glycerol-3-phosphate 3-phosphatidyltransfe | -0.395103333 | 0.001819 | 0.00346  |
| AB57_0394 |      | methylated-DNA--protein-cysteine methyltransferase transcript | -0.636727049 | 2.19E-08 | 9.54E-08 |
| AB57_0395 |      | DNA repair system                                             | -1.067004812 | 3.39E-17 | 7.17E-16 |
| AB57_0396 |      | transcriptional regulator, IclR family                        | -0.301879937 | 0.007231 | 0.01224  |
| AB57_0397 |      | putative fusaric acid resistance protein                      | 0.060287589  | 0.618186 | 0.667237 |
| AB57_0398 |      | hypothetical protein                                          | 0.064470665  | 0.738328 | 0.776525 |
| AB57_0399 |      | HlyD family secretion protein                                 | 0.445559563  | 2.93E-05 | 7.68E-05 |
| AB57_0400 |      | Holliday junction resolvase-like protein                      | 0.466004342  | 1.82E-06 | 5.94E-06 |
| AB57_0401 |      | hypothetical protein                                          | 0.264271457  | 0.031708 | 0.046852 |
| AB57_0402 | recN | DNA repair protein RecN                                       | 0.114873824  | 0.316564 | 0.375533 |
| AB57_0403 |      | tetratricopeptide repeat domain protein                       | -0.421578212 | 0.00053  | 0.001103 |
| AB57_0404 |      | protein Nfa15710                                              | -0.053277494 | 0.597237 | 0.64917  |
| AB57_0405 |      | RNA methyltransferase, TrmH family, group 3                   | 1.210941251  | 9.42E-14 | 1.03E-12 |
| AB57_0406 | coaE | dephospho-CoA kinase                                          | -0.041249453 | 0.723845 | 0.763898 |
| AB57_0407 |      | integral membrane protein DUF6                                | 0.300714456  | 0.016667 | 0.025998 |
| AB57_0408 | pilD | type IV pilus prepilin peptidase PilD                         | -0.070842847 | 0.557702 | 0.614319 |
| AB57_0409 |      | pilin biogenesis protein                                      | 0.084688991  | 0.584349 | 0.637314 |
| AB57_0410 | pilB | type IV-A pilus assembly ATPase PilB                          | -0.133952882 | 0.243455 | 0.298175 |
| AB57_0411 | tpiA | triosephosphate isomerase                                     | 1.897978551  | 1.64E-21 | 7.32E-20 |
| AB57_0412 |      | preprotein translocase subunit SecG                           | 0.817786337  | 2.66E-06 | 8.32E-06 |

|           |      |                                                                |              |          |          |
|-----------|------|----------------------------------------------------------------|--------------|----------|----------|
| AB57_0413 |      | hypothetical protein                                           | 1.534722657  | 2.64E-17 | 5.68E-16 |
| AB57_0414 |      | transcription elongation factor NusA                           | 1.121731872  | 5.82E-08 | 2.37E-07 |
| AB57_0415 |      | translation initiation factor IF-2                             | 0.416532837  | 0.014043 | 0.022277 |
| AB57_0416 | rbfA | ribosome-binding factor A                                      | 0.296358718  | 0.104381 | 0.13813  |
| AB57_0417 |      | putative monovalent cation/H+ antiporter subunit G             | -0.26497631  | 0.008789 | 0.014615 |
| AB57_0418 |      | pH adaptation potassium efflux system protein F                | 0.254756354  | 0.034957 | 0.051103 |
| AB57_0419 |      | pH adaptation potassium efflux system transmembrane protein    | 0.411771446  | 0.000843 | 0.0017   |
| AB57_0420 |      | putative monovalent cation/H+ antiporter subunit D             | 0.588438352  | 4.26E-05 | 0.000108 |
| AB57_0421 |      | putative monovalent cation/H+ antiporter subunit C             | 0.725006405  | 0.000117 | 0.000275 |
| AB57_0422 |      | putative monovalent cation/H+ antiporter subunit A             | 0.644711993  | 0.0008   | 0.001621 |
| AB57_0423 |      | putative ATP binding site                                      | -0.909672485 | 1.42E-11 | 1.08E-10 |
| AB57_0424 |      | putative DNA helicase                                          | 0.642523077  | 2.44E-06 | 7.71E-06 |
| AB57_0425 |      | phosphoribosyl (-ATP, -AMP) pyrophosphohydrolase/cyclohydr     | 0.084759023  | 0.489658 | 0.549177 |
| AB57_0426 |      | putative oxidoreductase; putative flavoprotein monooxygenase   | -0.605826789 | 9.20E-06 | 2.62E-05 |
| AB57_0427 |      | 2-octaprenylphenol hydroxylase of ubiquinone biosynthetic patl | 0.611457418  | 0.000179 | 0.000407 |
| AB57_0428 |      | hypothetical protein                                           | 0.726549744  | 1.85E-09 | 9.66E-09 |
| AB57_0429 |      | ubiquinone/menaquinone biosynthesis methyltransferase UbiE     | 0.127949155  | 0.339581 | 0.400015 |
| AB57_0430 |      | hypothetical protein                                           | -0.264788121 | 0.028449 | 0.042496 |
| AB57_0433 |      | hypothetical protein                                           | -0.878366952 | 1.24E-10 | 7.87E-10 |
| AB57_0434 |      | exonuclease V gamma chain                                      | 0.04581091   | 0.695956 | 0.738468 |
| AB57_0435 |      | exonuclease V beta chain                                       | -0.275280893 | 0.024658 | 0.037269 |
| AB57_0436 | recD | exonuclease V alpha subunit                                    | 0.034639656  | 0.723551 | 0.763805 |
| AB57_0437 |      | beta-lactamase                                                 | -0.541688815 | 2.76E-07 | 1.01E-06 |
| AB57_0438 | rpsO | 30S ribosomal protein S15                                      | -0.343822638 | 0.027623 | 0.041361 |
| AB57_0439 |      | polynucleotide phosphorylase/polyadenylase                     | 0.841019303  | 8.69E-06 | 2.49E-05 |
| AB57_0440 |      | magnesium Mg(2+)/cobalt Co(2+) transport protein               | -1.016247849 | 3.04E-12 | 2.64E-11 |
| AB57_0441 |      | hypothetical protein                                           | -1.068027767 | 3.11E-23 | 1.69E-21 |
| AB57_0442 |      | curved DNA-binding protein                                     | -1.148177101 | 3.70E-25 | 2.91E-23 |
| AB57_0443 |      | transporter, LysE family                                       | -0.684152882 | 1.01E-10 | 6.51E-10 |
| AB57_0444 | hslO | heat shock protein 33                                          | -0.224138041 | 0.088163 | 0.11849  |
| AB57_0445 |      | glutathione-regulated potassium-efflux system protein KefB     | -0.24203191  | 0.015132 | 0.023784 |
| AB57_0446 | priA | primosomal protein N`                                          | -0.029050881 | 0.768433 | 0.803618 |
| AB57_0447 | gspF | general secretion pathway protein F                            | 0.164866849  | 0.1205   | 0.156934 |
| AB57_0448 |      | general secretion pathway protein G                            | 0.058129342  | 0.580474 | 0.634679 |
| AB57_0449 |      | hypothetical protein                                           | 0.189927205  | 0.351185 | 0.411067 |
| AB57_0450 |      | secretion chaperone                                            | -0.283064742 | 0.007991 | 0.013409 |
| AB57_0451 | Int  | apolipoprotein N-acyltransferase                               | 0.276530165  | 0.02235  | 0.034113 |
| AB57_0452 |      | magnesium and cobalt efflux protein CorC                       | -0.084063041 | 0.430685 | 0.491528 |
| AB57_0453 |      | sulfurtransferase TusA                                         | -0.622458268 | 2.27E-09 | 1.17E-08 |
| AB57_0454 |      | hypothetical protein                                           | -0.346546044 | 0.002505 | 0.004622 |
| AB57_0455 |      | electron transfer flavoprotein-ubiquinone oxidoreductase (EsvG | 0.727120742  | 0.000102 | 0.000241 |
| AB57_0456 |      | hypothetical protein                                           | 0.185967937  | 0.08383  | 0.113203 |
| AB57_0457 | murl | glutamate racemase                                             | -0.769797645 | 3.60E-11 | 2.55E-10 |
| AB57_0459 |      | hypothetical protein                                           | -0.091164121 | 0.48767  | 0.547113 |
| AB57_0460 | hemH | ferrochelataase                                                | -0.059384761 | 0.559593 | 0.615852 |
| AB57_0461 |      | hypothetical protein                                           | -0.129011686 | 0.292386 | 0.350447 |
| AB57_0462 |      | beta-lactamase domain protein                                  | -0.067043205 | 0.593646 | 0.646026 |
| AB57_0463 |      | methyltransferase superfamily                                  | 1.267151745  | 9.72E-20 | 3.07E-18 |
| AB57_0464 |      | hypothetical protein                                           | 0.985396957  | 6.43E-11 | 4.31E-10 |
| AB57_0465 |      | hypothetical protein                                           | 0.071777367  | 0.499195 | 0.558688 |
| AB57_0466 | crcB | camphor resistance protein CrcB                                | -0.305901447 | 0.004721 | 0.008278 |
| AB57_0467 |      | type III effector HopPmaJ                                      | 0.416901036  | 0.000538 | 0.00112  |
| AB57_0468 | rpmE | 50S ribosomal protein L31 type B                               | 0.466411212  | 0.005637 | 0.009746 |
| AB57_0469 |      | hypothetical protein                                           | -0.921233981 | 3.52E-08 | 1.48E-07 |
| AB57_0470 |      | acyl-CoA dehydrogenase-family protein                          | -2.087031159 | 1.01E-08 | 4.62E-08 |
| AB57_0471 |      | acyl-CoA dehydrogenase-family protein                          | -1.68668074  | 4.48E-20 | 1.45E-18 |
| AB57_0472 | abeM | multidrug efflux pump                                          | 0.197068839  | 0.042211 | 0.060676 |
| AB57_0473 |      | hypothetical protein                                           | -1.321748784 | 4.21E-16 | 7.38E-15 |

|           |      |                                                            |              |          |          |
|-----------|------|------------------------------------------------------------|--------------|----------|----------|
| AB57_0474 |      | putative oxygen-independent coproporphyrinogen III oxidase | 0.401883467  | 0.000444 | 0.000942 |
| AB57_0475 |      | short chain dehydrogenase                                  | 0.031732283  | 0.829408 | 0.858408 |
| AB57_0476 |      | transcriptional regulator, HTH-type                        | -0.452267507 | 0.000126 | 0.000294 |
| AB57_0477 |      | long-chain-acyl-CoA synthetase                             | 0.149653909  | 0.273476 | 0.330242 |
| AB57_0478 |      | ribonuclease E                                             | 0.336912834  | 0.052459 | 0.073943 |
| AB57_0480 |      | hypothetical protein                                       | 0.011962126  | 0.904819 | 0.922521 |
| AB57_0481 | rluC | ribosomal large subunit pseudouridine synthase C           | 0.611983535  | 1.97E-07 | 7.35E-07 |
| AB57_0482 |      | HAD-superfamily hydrolase                                  | 0.498592637  | 9.32E-05 | 0.000223 |
| AB57_0483 |      | transcriptional regulator, DeoR family                     | 0.146795264  | 0.199526 | 0.248987 |
| AB57_0484 |      | glutathione S-transferase                                  | -0.045476449 | 0.658966 | 0.704267 |
| AB57_0485 |      | hypothetical protein                                       | -0.379739301 | 0.005377 | 0.009345 |
| AB57_0486 |      | DNA-binding transcriptional regulator HcaR                 | -0.579843564 | 1.42E-05 | 3.91E-05 |
| AB57_0487 |      | hypothetical protein                                       | -0.290036577 | 0.032708 | 0.04812  |
| AB57_0488 | katG | catalase/peroxidase HPI                                    | -0.356174882 | 0.010826 | 0.0176   |
| AB57_0489 | ptsP | phosphoenolpyruvate-protein phosphotransferase             | -0.1234576   | 0.293763 | 0.351795 |
| AB57_0490 |      | dinucleoside polyphosphate hydrolase                       | -0.382627912 | 0.001382 | 0.002671 |
| AB57_0491 |      | HAD-superfamily subfamily IB hydrolase                     | -0.018113769 | 0.87225  | 0.895485 |
| AB57_0492 |      | transcriptional regulator, LysR family                     | 0.046283203  | 0.707761 | 0.749489 |
| AB57_0493 |      | hypothetical protein                                       | 0.026651854  | 0.872793 | 0.895793 |
| AB57_0494 | leuC | isopropylmalate isomerase large subunit                    | 0.531164774  | 2.39E-07 | 8.85E-07 |
| AB57_0495 | leuD | isopropylmalate isomerase small subunit                    | 0.245747981  | 0.023605 | 0.035794 |
| AB57_0496 |      | hypothetical protein                                       | -0.413486692 | 0.00021  | 0.000473 |
| AB57_0497 | leuB | 3-isopropylmalate dehydrogenase                            | 0.042779903  | 0.777693 | 0.812154 |
| AB57_0499 |      | hypothetical protein                                       | -0.814910115 | 3.57E-14 | 4.19E-13 |
| AB57_0500 | infA | translation initiation factor IF-1                         | 0.734734672  | 0.000136 | 0.000316 |
| AB57_0501 |      | helix-turn-helix- domain containing protein, AraC type     | -0.364516171 | 0.007316 | 0.012361 |
| AB57_0502 | truA | tRNA pseudouridine synthase A                              | 0.134437058  | 0.205115 | 0.255016 |
| AB57_0503 |      | putative L-asparaginase I                                  | 0.202420612  | 0.042093 | 0.060531 |
| AB57_0504 |      | hypothetical protein                                       | -0.053528686 | 0.674071 | 0.718129 |
| AB57_0505 |      | hypothetical protein                                       | -0.000269852 | 0.998809 | 0.999079 |
| AB57_0506 |      | hypothetical protein                                       | -0.380115748 | 0.000642 | 0.001316 |
| AB57_0507 | asd  | aspartate-semialdehyde dehydrogenase                       | 1.207088685  | 5.99E-12 | 4.90E-11 |
| AB57_0508 |      | endonuclease/exonuclease/phosphatase                       | -0.26738697  | 0.02429  | 0.036781 |
| AB57_0509 | dctA | glutamate/aspartate:proton symporter                       | 2.341219249  | 5.16E-18 | 1.26E-16 |
| AB57_0510 |      | glycosyl transferase, group 1                              | 0.389731437  | 0.000205 | 0.000461 |
| AB57_0511 |      | lipid A biosynthesis acyltransferase                       | 0.129427348  | 0.195602 | 0.244382 |
| AB57_0512 |      | RhtB family transporter                                    | -0.559910368 | 1.45E-06 | 4.79E-06 |
| AB57_0513 |      | ABC transporter ATP-binding protein uup                    | -0.708202549 | 9.84E-06 | 2.78E-05 |
| AB57_0514 |      | transposase subunit                                        | -0.667026863 | 1.92E-05 | 5.17E-05 |
| AB57_0515 |      | transposase 1                                              | -0.476942997 | 0.006369 | 0.010895 |
| AB57_0516 |      | ABC transporter ATP-binding protein uup                    | 0.55186947   | 2.02E-05 | 5.43E-05 |
| AB57_0517 |      | SlyX superfamily                                           | 0.06460039   | 0.552247 | 0.609398 |
| AB57_0518 |      | alcohol dehydrogenase, zinc-binding                        | -0.054527353 | 0.622477 | 0.671281 |
| AB57_0519 |      | transcriptional regulatory protein                         | -0.50552647  | 0.000903 | 0.001814 |
| AB57_0520 |      | hypothetical protein                                       | -0.335403459 | 0.002238 | 0.004166 |
| AB57_0521 | topA | DNA topoisomerase I                                        | 0.55593899   | 0.000971 | 0.001936 |
| AB57_0522 |      | hypothetical protein                                       | -0.188923915 | 0.119365 | 0.15562  |
| AB57_0523 |      | hypothetical protein                                       | -1.037020487 | 3.37E-11 | 2.39E-10 |
| AB57_0524 |      | putative ATP-dependent DNA helicase                        | 0.10498428   | 0.344661 | 0.404968 |
| AB57_0525 |      | hypothetical protein                                       | 0.21632941   | 0.085132 | 0.114822 |
| AB57_0526 |      | hypothetical protein                                       | 0.054812661  | 0.62809  | 0.675758 |
| AB57_0527 |      | hypothetical protein                                       | -0.59252179  | 8.22E-06 | 2.37E-05 |
| AB57_0528 |      | hypothetical protein                                       | -0.878641209 | 8.34E-09 | 3.85E-08 |
| AB57_0529 |      | monovalent cation transporter                              | -0.124051269 | 0.358107 | 0.418112 |
| AB57_0530 | rpmG | 50S ribosomal protein L33                                  | 1.008598924  | 1.23E-09 | 6.63E-09 |
| AB57_0531 | rpmB | 50S ribosomal protein L28                                  | 1.016317563  | 2.42E-08 | 1.05E-07 |
| AB57_0532 |      | aldehyde dehydrogenase                                     | -0.22865977  | 0.047929 | 0.067972 |
| AB57_0533 |      | transcriptional regulator, TetR family                     | 0.410913645  | 0.000156 | 0.000357 |

|           |      |                                                           |              |          |          |
|-----------|------|-----------------------------------------------------------|--------------|----------|----------|
| AB57_0534 | purU | formyltetrahydrofolate deformylase                        | 1.579636964  | 9.57E-21 | 3.61E-19 |
| AB57_0535 |      | TonB protein                                              | 0.537815256  | 1.91E-07 | 7.16E-07 |
| AB57_0536 |      | MotA/TolQ/ExbB proton channel                             | 0.943853031  | 1.21E-06 | 4.05E-06 |
| AB57_0537 |      | biopolymer transport protein ExbD/TolR                    | 0.98492032   | 4.30E-09 | 2.11E-08 |
| AB57_0538 | msrA | methionine-S-sulfoxide reductase                          | 0.491145271  | 5.77E-05 | 0.000143 |
| AB57_0539 |      | hypothetical protein                                      | 0.516300808  | 2.35E-07 | 8.72E-07 |
| AB57_0540 | folA | dihydrofolate reductase                                   | 1.323823704  | 7.68E-16 | 1.27E-14 |
| AB57_0541 | thyA | thymidylate synthase                                      | 1.365370591  | 1.23E-17 | 2.80E-16 |
| AB57_0542 |      | hypothetical protein                                      | -0.592718683 | 2.45E-07 | 9.04E-07 |
| AB57_0543 |      | hypothetical protein                                      | -0.725656673 | 1.25E-10 | 7.91E-10 |
| AB57_0544 | lgt  | prolipoprotein diacylglyceryl transferase                 | 0.024709396  | 0.811743 | 0.843665 |
| AB57_0545 |      | hypothetical protein                                      | -0.121448955 | 0.445508 | 0.506103 |
| AB57_0546 |      | putative phosphatase                                      | -0.430552574 | 0.022197 | 0.03391  |
| AB57_0547 |      | hypothetical protein                                      | -0.20595882  | 0.384051 | 0.444197 |
| AB57_0548 |      | hypothetical protein                                      | -0.242742934 | 0.203224 | 0.253089 |
| AB57_0549 |      | transposase subunit                                       | -0.816701724 | 2.62E-06 | 8.23E-06 |
| AB57_0550 |      | transposase 1                                             | -0.467073297 | 0.00087  | 0.001751 |
| AB57_0551 |      | beta-lactamase OXA-23                                     | 0.619642537  | 0.000146 | 0.000337 |
| AB57_0552 |      | AAA ATPase superfamily                                    | 0.112888722  | 0.342622 | 0.403085 |
| AB57_0553 |      | hypothetical protein                                      | -0.055097593 | 0.588778 | 0.641673 |
| AB57_0554 |      | YeeA                                                      | 0.033087077  | 0.756296 | 0.792846 |
| AB57_0555 |      | transposase 1                                             | -0.315222255 | 0.0141   | 0.022353 |
| AB57_0556 |      | transposase subunit                                       | -0.741915072 | 3.39E-08 | 1.43E-07 |
| AB57_0557 |      | sulfate permease                                          | -0.114328353 | 0.400573 | 0.461145 |
| AB57_0558 |      | universal stress protein                                  | 0.064725831  | 0.548161 | 0.605793 |
| AB57_0559 |      | hypothetical protein                                      | 0.015484761  | 0.896839 | 0.9159   |
| AB57_0560 |      | hypothetical protein                                      | -0.362919531 | 0.005848 | 0.010078 |
| AB57_0561 |      | hypothetical protein                                      | -0.836291267 | 2.41E-15 | 3.60E-14 |
| AB57_0562 |      | hypothetical protein                                      | -0.408976277 | 0.000266 | 0.000586 |
| AB57_0563 |      | transposition helper protein C                            | -0.151960187 | 0.200918 | 0.250387 |
| AB57_0564 |      | transposition protein B                                   | 0.193202014  | 0.204561 | 0.254413 |
| AB57_0565 |      | transposase protein A                                     | 0.007894541  | 0.939799 | 0.951369 |
| AB57_0567 |      | alkaline phosphatase                                      | 0.569154386  | 3.54E-06 | 1.09E-05 |
| AB57_0568 | tatC | twin arginine-targeting protein translocase TatC          | -0.568520637 | 9.27E-06 | 2.64E-05 |
| AB57_0569 |      | Sec-independent protein translocase protein               | 0.240751363  | 0.164139 | 0.208127 |
| AB57_0570 |      | Sec-independent protein translocase protein               | 0.384743491  | 0.084051 | 0.113458 |
| AB57_0571 |      | hypothetical protein                                      | 0.413663468  | 0.00029  | 0.000633 |
| AB57_0572 | rdgB | putative deoxyribonucleotide triphosphate pyrophosphatase | 0.826128915  | 7.11E-15 | 9.64E-14 |
| AB57_0573 |      | Sel1 domain protein                                       | -0.132323027 | 0.304268 | 0.363042 |
| AB57_0574 | metW | methionine biosynthesis protein MetW                      | 0.287915792  | 0.014294 | 0.022611 |
| AB57_0575 | metX | homoserine O-acetyltransferase                            | 0.641571164  | 7.23E-06 | 2.12E-05 |
| AB57_0576 | leuA | 2-isopropylmalate synthase                                | 0.299336964  | 0.067559 | 0.093272 |
| AB57_0577 |      | putative hydroxylase                                      | 0.264189698  | 0.021154 | 0.032435 |
| AB57_0578 |      | TonB-dependent receptor                                   | 2.069088132  | 1.60E-14 | 1.98E-13 |
| AB57_0579 | tig  | trigger factor                                            | 1.681858163  | 5.32E-14 | 5.96E-13 |
| AB57_0580 | clpP | ATP-dependent Clp protease proteolytic subunit            | -0.07427049  | 0.601963 | 0.653156 |
| AB57_0581 | clpX | ATP-dependent protease ATP-binding subunit ClpX           | 0.091389845  | 0.561091 | 0.61695  |
| AB57_0582 |      | hypothetical protein                                      | -0.708257304 | 2.17E-09 | 1.12E-08 |
| AB57_0583 |      | hypothetical protein                                      | -0.805248765 | 1.34E-10 | 8.47E-10 |
| AB57_0584 |      | fumarate hydratase                                        | 1.422704565  | 2.88E-12 | 2.52E-11 |
| AB57_0585 |      | phosphate acetyltransferase                               | 0.56690284   | 8.90E-05 | 0.000213 |
| AB57_0586 | ackA | acetate kinase                                            | 0.122684684  | 0.349465 | 0.409452 |
| AB57_0587 | edd  | phosphogluconate dehydratase                              | 0.494944613  | 0.003074 | 0.005578 |
| AB57_0588 |      | khg/kdpg aldolase                                         | 0.437061007  | 0.005288 | 0.009199 |
| AB57_0589 |      | high affinity gluconate permease                          | 0.443475961  | 0.008594 | 0.014323 |
| AB57_0590 |      | shikimate kinase                                          | 0.244453609  | 0.053166 | 0.074825 |
| AB57_0591 |      | aldehyde dehydrogenase                                    | -0.034500457 | 0.797923 | 0.831872 |
| AB57_0592 | proA | gamma-glutamyl phosphate reductase                        | -0.023935654 | 0.859066 | 0.884157 |

|           |      |                                                            |              |          |          |
|-----------|------|------------------------------------------------------------|--------------|----------|----------|
| AB57_0593 |      | putative hydrolase                                         | -0.26698706  | 0.041717 | 0.060059 |
| AB57_0594 |      | hypothetical protein                                       | -0.525818474 | 5.64E-06 | 1.67E-05 |
| AB57_0595 |      | beta-hexosaminidase                                        | 0.330899997  | 0.000928 | 0.001859 |
| AB57_0596 |      | carboxy- protease                                          | -0.257675701 | 0.078516 | 0.106806 |
| AB57_0597 |      | glycosyl transferase, group 1 family protein               | -1.24415256  | 2.25E-26 | 2.25E-24 |
| AB57_0598 |      | putative phosphatidylglycerophosphatase B                  | -1.155751832 | 4.40E-16 | 7.61E-15 |
| AB57_0599 |      | hypothetical protein                                       | 1.401294377  | 1.12E-25 | 1.07E-23 |
| AB57_0600 |      | nucleoside diphosphate kinase                              | 2.139374584  | 5.38E-23 | 2.84E-21 |
| AB57_0601 |      | radical SAM enzyme, Cfr family                             | 0.604596803  | 0.000955 | 0.001907 |
| AB57_0602 | pilF | type IV pilus biogenesis/stability protein PilW            | 0.268865365  | 0.020714 | 0.031815 |
| AB57_0603 |      | hypothetical protein                                       | 0.830851876  | 4.67E-09 | 2.26E-08 |
| AB57_0604 | ispG | 4-hydroxy-3-methylbut-2-en-1-yl diphosphate synthase       | 0.562341367  | 0.000333 | 0.000717 |
| AB57_0605 | hisS | histidyl-tRNA synthetase                                   | 0.918280301  | 1.81E-07 | 6.84E-07 |
| AB57_0606 |      | hypothetical protein                                       | 1.078074831  | 1.35E-13 | 1.44E-12 |
| AB57_0607 | yfgL | outer membrane assembly lipoprotein YfgL                   | 0.261471806  | 0.098322 | 0.130485 |
| AB57_0608 |      | GTP-binding protein EngA                                   | 1.526224699  | 2.79E-13 | 2.84E-12 |
| AB57_0609 |      | 4'-phosphopantetheinyl transferase                         | -0.099152007 | 0.380016 | 0.440174 |
| AB57_0610 | secB | preprotein translocase subunit SecB                        | 1.359895645  | 4.31E-12 | 3.62E-11 |
| AB57_0611 | grxC | glutaredoxin 3                                             | 0.618942179  | 7.93E-05 | 0.000191 |
| AB57_0612 |      | rhodanese domain protein                                   | 0.161094876  | 0.310852 | 0.369467 |
| AB57_0613 | engC | probable GTPase                                            | 0.946750333  | 1.45E-12 | 1.31E-11 |
| AB57_0614 | orn  | oligoribonuclease                                          | 0.331635369  | 0.006396 | 0.010931 |
| AB57_0615 |      | hypothetical protein                                       | -0.330683553 | 0.023051 | 0.035011 |
| AB57_0616 |      | NADH-dependent enoyl-ACP reductase                         | 2.053734077  | 6.62E-39 | 2.72E-36 |
| AB57_0617 |      | RND efflux system, outer membrane lipoprotein, NodT family | 0.353009715  | 0.009004 | 0.014912 |
| AB57_0618 |      | macrolide export ATP-binding/permease protein MacB         | 0.116482529  | 0.46954  | 0.529987 |
| AB57_0619 |      | efflux transporter, RND family, MFP subunit                | 0.236803057  | 0.122655 | 0.159573 |
| AB57_0620 | holA | DNA polymerase III, delta subunit                          | 0.243011531  | 0.016264 | 0.025413 |
| AB57_0621 |      | hypothetical protein                                       | -0.091563016 | 0.456458 | 0.516956 |
| AB57_0622 | leuS | leucyl-tRNA synthetase                                     | 0.804594273  | 5.73E-06 | 1.69E-05 |
| AB57_0623 |      | hypothetical protein                                       | -0.501893203 | 0.0032   | 0.005798 |
| AB57_0624 | ilvB | acetolactate synthase 3 catalytic subunit                  | 0.309793217  | 0.036402 | 0.053089 |
| AB57_0625 | ilvN | acetolactate synthase 3 regulatory subunit                 | 0.635497634  | 4.93E-06 | 1.48E-05 |
| AB57_0626 | ilvC | ketol-acid reductoisomerase                                | 1.491655199  | 7.55E-15 | 1.02E-13 |
| AB57_0627 |      | ggdef domain/eal domain protein                            | -0.892553624 | 4.39E-06 | 1.33E-05 |
| AB57_0628 |      | putative transcriptional regulator                         | -0.138079595 | 0.592013 | 0.644439 |
| AB57_0629 |      | putative transcriptional regulator                         | -0.491630221 | 1.47E-05 | 4.03E-05 |
| AB57_0630 |      | hypothetical protein                                       | -0.108671792 | 0.296026 | 0.354236 |
| AB57_0631 | prfC | peptide chain release factor 3                             | 2.161473823  | 8.94E-19 | 2.42E-17 |
| AB57_0632 |      | hypothetical protein                                       | 1.449704383  | 4.09E-22 | 1.94E-20 |
| AB57_0633 |      | hypothetical protein                                       | 0.739935952  | 6.08E-09 | 2.87E-08 |
| AB57_0634 |      | hypothetical protein                                       | -0.336539034 | 0.003851 | 0.006871 |
| AB57_0635 |      | hydrolase, TatD family                                     | -0.340006115 | 0.016507 | 0.025771 |
| AB57_0636 | acnA | aconitate hydratase 1                                      | -0.40127617  | 0.008956 | 0.014846 |
| AB57_0637 |      | ThiF family protein                                        | 0.906595734  | 4.61E-12 | 3.85E-11 |
| AB57_0639 |      | transcriptional Regulator, LysR family                     | 0.749559274  | 1.02E-12 | 9.64E-12 |
| AB57_0640 |      | hypothetical protein                                       | 1.527370301  | 1.56E-38 | 5.78E-36 |
| AB57_0641 | dusA | tRNA-dihydrouridine synthase A                             | 1.139989699  | 2.90E-25 | 2.38E-23 |
| AB57_0642 |      | hypothetical protein                                       | -0.125193736 | 0.503739 | 0.563262 |
| AB57_0643 |      | hypothetical protein                                       | -0.526083189 | 0.000275 | 0.000604 |
| AB57_0644 |      | chorismate mutase family protein                           | -0.175027583 | 0.103118 | 0.136555 |
| AB57_0645 |      | hypothetical protein                                       | -0.446902427 | 0.000118 | 0.000278 |
| AB57_0646 |      | hypothetical protein                                       | -0.295195149 | 0.028942 | 0.043128 |
| AB57_0647 |      | hypothetical protein                                       | -0.480282959 | 2.70E-05 | 7.13E-05 |
| AB57_0648 |      | hypothetical protein                                       | -0.884425368 | 3.08E-14 | 3.64E-13 |
| AB57_0649 |      | hypothetical protein                                       | 0.306010307  | 0.108499 | 0.142711 |
| AB57_0650 |      | hypothetical protein                                       | 0.455330224  | 0.072102 | 0.098843 |
| AB57_0651 |      | hypothetical protein                                       | 0.57308992   | 5.93E-05 | 0.000146 |

|           |      |                                                             |              |          |          |
|-----------|------|-------------------------------------------------------------|--------------|----------|----------|
| AB57_0653 |      | hypothetical protein                                        | -0.181725556 | 0.195529 | 0.244382 |
| AB57_0654 |      | hypothetical protein                                        | 0.019683621  | 0.912957 | 0.929282 |
| AB57_0655 |      | hypothetical protein                                        | -0.041260899 | 0.832967 | 0.861128 |
| AB57_0656 |      | phage/plasmid-related protein                               | 0.22311537   | 0.139469 | 0.179117 |
| AB57_0657 |      | copper resistance D                                         | -0.484226845 | 0.004007 | 0.007125 |
| AB57_0658 |      | copper resistance protein CopC                              | -0.462473535 | 0.014268 | 0.022581 |
| AB57_0659 |      | copper-translocating P-type ATPase                          | -0.644502581 | 1.26E-10 | 7.95E-10 |
| AB57_0660 |      | sensor kinase CusS                                          | 0.053115192  | 0.617018 | 0.666433 |
| AB57_0661 |      | transcriptional activator protein CusR                      | -0.244318192 | 0.040816 | 0.058922 |
| AB57_0662 |      | hypothetical protein                                        | -0.217210744 | 0.186313 | 0.234077 |
| AB57_0663 |      | copper resistance protein A                                 | -0.319200081 | 0.001349 | 0.002612 |
| AB57_0664 |      | copper resistance protein B                                 | -0.145490868 | 0.200146 | 0.249592 |
| AB57_0665 |      | transcriptional regulator, HTH_3 family                     | 0.476016644  | 0.001875 | 0.003564 |
| AB57_0666 |      | hypothetical protein                                        | 0.01547137   | 0.895369 | 0.914651 |
| AB57_0667 |      | major facilitator superfamily MFS_1                         | 0.205372922  | 0.042416 | 0.060924 |
| AB57_0668 |      | ribonuclease                                                | -0.147984261 | 0.447199 | 0.507401 |
| AB57_0669 |      | integral membrane protein, DUF6                             | -0.542468283 | 6.63E-06 | 1.95E-05 |
| AB57_0670 |      | NAD(P) transhydrogenase subunit alpha                       | 0.104850392  | 0.393001 | 0.453415 |
| AB57_0671 |      | NAD(P) transhydrogenase subunit alpha                       | 0.464751947  | 0.009568 | 0.015755 |
| AB57_0672 |      | NAD(P) transhydrogenase subunit beta                        | 0.45293362   | 0.003361 | 0.006054 |
| AB57_0673 |      | short chain dehydrogenase                                   | -0.387693929 | 0.000549 | 0.00114  |
| AB57_0674 |      | hypothetical protein                                        | 0.310193083  | 0.044824 | 0.063911 |
| AB57_0675 |      | hydroxypyruvate isomerase                                   | -0.929102558 | 3.21E-16 | 5.75E-15 |
| AB57_0676 |      | 3-hydroxyisobutyrate dehydrogenase                          | 0.262818665  | 0.018092 | 0.028032 |
| AB57_0677 |      | enoyl-CoA hydratase                                         | -0.142786281 | 0.307918 | 0.366806 |
| AB57_0678 |      | multi-sensor hybrid histidine kinase                        | -0.472072457 | 2.90E-06 | 9.05E-06 |
| AB57_0679 |      | hamp domain protein                                         | -0.303057648 | 0.018623 | 0.028793 |
| AB57_0680 | cysM | cysteine synthase B                                         | 0.92550377   | 4.97E-12 | 4.11E-11 |
| AB57_0681 |      | hypothetical protein                                        | 0.886096331  | 4.95E-10 | 2.84E-09 |
| AB57_0682 | rumA | 23S rRNA 5-methyluridine methyltransferase                  | 0.293917348  | 0.013035 | 0.020851 |
| AB57_0683 |      | GTP pyrophosphokinase (ppGpp synthetase I)                  | -0.170154951 | 0.273906 | 0.330654 |
| AB57_0684 |      | short chain dehydrogenase                                   | -0.815330201 | 7.90E-11 | 5.20E-10 |
| AB57_0685 |      | nucleoside triphosphate pyrophosphohydrolase                | -0.426255355 | 0.00025  | 0.000553 |
| AB57_0686 |      | putative DNA uptake protein ComEA                           | 0.093602207  | 0.537044 | 0.594395 |
| AB57_0687 |      | poly(A) polymerase                                          | 0.232938436  | 0.05453  | 0.076628 |
| AB57_0688 | folk | 2-amino-4-hydroxy-6-hydroxymethylidihydropteridine pyrophos | 0.865545066  | 4.46E-11 | 3.09E-10 |
| AB57_0689 | panB | 3-methyl-2-oxobutanoate hydroxymethyltransferase            | 0.980330045  | 8.30E-12 | 6.66E-11 |
| AB57_0690 | panC | pantoate--beta-alanine ligase                               | 0.492617272  | 0.000724 | 0.001475 |
| AB57_0691 |      | hypothetical protein                                        | -0.363520584 | 0.006706 | 0.011409 |
| AB57_0692 |      | phosphocarrier protein HPr                                  | -0.318130231 | 0.00196  | 0.003711 |
| AB57_0693 |      | hypothetical protein                                        | 0.525166125  | 4.41E-07 | 1.57E-06 |
| AB57_0694 |      | acyl-CoA synthetase                                         | -0.445474659 | 0.00045  | 0.00095  |
| AB57_0695 | thrS | threonyl-tRNA synthetase                                    | 1.043592573  | 6.49E-08 | 2.63E-07 |
| AB57_0696 |      | translation initiation factor IF-3                          | 1.07245771   | 3.16E-09 | 1.59E-08 |
| AB57_0697 |      | glutathione S-transferase                                   | -0.211815384 | 0.078115 | 0.106299 |
| AB57_0698 |      | hypothetical protein                                        | -0.573977306 | 4.56E-06 | 1.38E-05 |
| AB57_0699 |      | major facilitator superfamily MFS_1                         | 0.099181306  | 0.436554 | 0.497766 |
| AB57_0700 | rpml | 50S ribosomal protein L35                                   | 0.248818772  | 0.189936 | 0.238144 |
| AB57_0701 | rplT | 50S ribosomal protein L20                                   | 0.249999101  | 0.183556 | 0.230849 |
| AB57_0703 |      | hypothetical protein                                        | 0.020314046  | 0.842601 | 0.869872 |
| AB57_0704 | pheS | phenylalanyl-tRNA synthetase subunit alpha                  | 1.323007337  | 2.95E-16 | 5.32E-15 |
| AB57_0705 | pheT | phenylalanyl-tRNA synthetase subunit beta                   | 0.750921256  | 0.000112 | 0.000264 |
| AB57_0706 | ihfA | integration host factor subunit alpha                       | 0.025443612  | 0.84522  | 0.87209  |
| AB57_0707 |      | hypothetical protein                                        | -0.127105738 | 0.447048 | 0.507386 |
| AB57_0708 | rho  | transcription termination factor Rho                        | 1.248778505  | 2.60E-09 | 1.33E-08 |
| AB57_0709 | trx  | thioredoxin                                                 | 0.607966143  | 4.99E-06 | 1.50E-05 |
| AB57_0710 |      | exopolyphosphatase                                          | 0.570404513  | 1.28E-07 | 4.95E-07 |
| AB57_0711 | accA | acetyl-CoA carboxylase, carboxyl transferase, alpha subunit | 0.873708838  | 1.81E-10 | 1.12E-09 |



|           |      |                                                                 |              |          |          |
|-----------|------|-----------------------------------------------------------------|--------------|----------|----------|
| AB57_0712 |      | tRNA(Ile)-lysidine synthase                                     | -0.145208992 | 0.186992 | 0.23485  |
| AB57_0713 | proC | pyrroline-5-carboxylate reductase                               | 0.609407604  | 3.09E-06 | 9.62E-06 |
| AB57_0714 |      | hypothetical protein                                            | 0.726547894  | 1.64E-08 | 7.25E-08 |
| AB57_0715 |      | DNA polymerase I                                                | 1.061919803  | 1.60E-08 | 7.10E-08 |
| AB57_0716 |      | MscS Mechanosensitive ion channel                               | -0.131206064 | 0.282675 | 0.340351 |
| AB57_0717 |      | hypothetical protein                                            | -0.912770027 | 3.52E-10 | 2.07E-09 |
| AB57_0718 |      | hypothetical protein                                            | 0.010562447  | 0.917759 | 0.933657 |
| AB57_0719 | gspE | general secretory pathway protein E                             | -0.379063012 | 0.000848 | 0.001708 |
| AB57_0720 |      | hypothetical protein                                            | 0.492083243  | 0.000147 | 0.000339 |
| AB57_0721 |      | transcriptional regulator OhrR                                  | -0.783070083 | 7.64E-08 | 3.07E-07 |
| AB57_0722 |      | hypothetical protein                                            | -0.333492624 | 0.007734 | 0.013024 |
| AB57_0723 |      | hypothetical protein                                            | -0.599652173 | 1.14E-09 | 6.18E-09 |
| AB57_0724 |      | carbon-nitrogen hydrolase                                       | 0.39841595   | 0.001568 | 0.003007 |
| AB57_0725 |      | putative anti-anti-sigma factor                                 | -0.002509198 | 0.984578 | 0.987062 |
| AB57_0726 |      | putative two-component response regulator                       | -0.283898884 | 0.023352 | 0.03544  |
| AB57_0727 |      | VacJ family lipoprotein                                         | -0.071921887 | 0.54373  | 0.601075 |
| AB57_0729 | rpoN | RNA polymerase factor sigma-54                                  | -0.57733677  | 4.63E-06 | 1.40E-05 |
| AB57_0730 | raiA | ribosomal subunit interface protein                             | -1.586829379 | 3.89E-17 | 8.14E-16 |
| AB57_0731 |      | hypothetical protein                                            | 0.533866713  | 6.58E-06 | 1.94E-05 |
| AB57_0732 | murA | UDP-N-acetylglucosamine 1-carboxyvinyltransferase               | 1.354743353  | 2.97E-12 | 2.58E-11 |
| AB57_0733 | hisG | ATP phosphoribosyltransferase catalytic subunit                 | 0.896888011  | 1.69E-07 | 6.39E-07 |
| AB57_0737 | hisC | histidinol-phosphate aminotransferase                           | 1.253496636  | 1.01E-16 | 1.96E-15 |
| AB57_0738 |      | P-aminobenzoate synthetase                                      | 0.239529891  | 0.051375 | 0.072497 |
| AB57_0739 |      | FilA                                                            | -0.416538385 | 0.008077 | 0.013529 |
| AB57_0740 |      | FilB                                                            | -0.67044999  | 0.000619 | 0.001274 |
| AB57_0741 |      | FilC                                                            | -0.05912403  | 0.599229 | 0.650762 |
| AB57_0742 |      | FilD                                                            | -0.065125327 | 0.549678 | 0.606745 |
| AB57_0743 |      | FilE                                                            | -0.704464547 | 9.63E-12 | 7.58E-11 |
| AB57_0744 |      | FilF                                                            | -0.725557777 | 9.31E-09 | 4.28E-08 |
| AB57_0745 |      | nudix hydrolase                                                 | -0.59625052  | 6.41E-07 | 2.23E-06 |
| AB57_0746 |      | nudix hydrolase                                                 | -0.885469584 | 7.34E-09 | 3.44E-08 |
| AB57_0747 |      | transferase hexapeptide repeat protein                          | -0.402156321 | 0.000446 | 0.000945 |
| AB57_0748 |      | glycoprotease                                                   | 0.871347888  | 5.59E-14 | 6.25E-13 |
| AB57_0749 |      | hypothetical protein                                            | 0.708692321  | 3.37E-09 | 1.69E-08 |
| AB57_0750 |      | hypothetical protein                                            | -0.187834807 | 0.131368 | 0.169833 |
| AB57_0751 | fghA | S-formylglutathione hydrolase                                   | -0.194442675 | 0.069033 | 0.094987 |
| AB57_0752 |      | hypothetical protein                                            | -0.070851894 | 0.594894 | 0.647194 |
| AB57_0753 | rpe  | ribulose-phosphate 3-epimerase                                  | 0.629331644  | 6.55E-05 | 0.00016  |
| AB57_0754 |      | hypothetical protein                                            | 0.329617365  | 0.002266 | 0.004214 |
| AB57_0755 |      | hypothetical protein                                            | -0.220407306 | 0.04683  | 0.066515 |
| AB57_0756 |      | copper resistance protein A                                     | -0.227154001 | 0.035811 | 0.052247 |
| AB57_0757 |      | copper resistance protein B                                     | 0.039912359  | 0.7145   | 0.755761 |
| AB57_0758 |      | Co/Zn/Cd efflux system component                                | -0.881242543 | 3.22E-15 | 4.73E-14 |
| AB57_0759 |      | suppressor of gro                                               | -0.547902853 | 3.19E-05 | 8.31E-05 |
| AB57_0760 |      | 6-O-methylguanine-DNA methyltransferase                         | -0.385130229 | 0.003298 | 0.005953 |
| AB57_0761 | argJ | bifunctional ornithine acetyltransferase/N-acetylglutamate synt | 0.089245984  | 0.420147 | 0.481432 |
| AB57_0762 | nadA | quinolinate synthetase                                          | 0.349673747  | 0.00727  | 0.012294 |
| AB57_0763 | add  | adenosine deaminase                                             | -1.088978398 | 6.16E-19 | 1.73E-17 |
| AB57_0764 |      | zinc-binding dehydrogenase                                      | -1.045389619 | 9.61E-14 | 1.05E-12 |
| AB57_0765 |      | transcriptional regulator, LysR family                          | -0.371782966 | 0.004125 | 0.00732  |
| AB57_0766 |      | glutaryl-CoA dehydrogenase                                      | 0.300193478  | 0.009221 | 0.015237 |
| AB57_0767 |      | cis,cis-muconate transport protein                              | -0.157103351 | 0.253273 | 0.309156 |
| AB57_0768 |      | L-carnitine dehydrogenase                                       | -0.329394697 | 0.006158 | 0.010562 |
| AB57_0769 |      | citrate utilization protein B                                   | -0.253186601 | 0.107751 | 0.141879 |
| AB57_0770 |      | tricarballoylate dehydrogenase                                  | -0.340000136 | 0.053906 | 0.075809 |
| AB57_0771 |      | LysR-family transcriptional regulator                           | -0.716639644 | 2.68E-07 | 9.81E-07 |
| AB57_0772 |      | extracellular solute-binding protein, family 1                  | -1.094749149 | 1.13E-11 | 8.76E-11 |
| AB57_0773 |      | citrate-proton symporter                                        | -0.373229197 | 0.013966 | 0.022169 |

|           |       |                                                              |              |          |          |
|-----------|-------|--------------------------------------------------------------|--------------|----------|----------|
| AB57_0774 |       | transcriptional regulator, LysR family                       | -0.820795546 | 2.62E-09 | 1.34E-08 |
| AB57_0775 |       | long-chain fatty acid transport protein                      | -0.741338516 | 2.47E-06 | 7.79E-06 |
| AB57_0776 |       | amidohydrolase                                               | 0.234476095  | 0.027336 | 0.040965 |
| AB57_0777 |       | transcriptional regulator, AraC family                       | -0.886592343 | 1.06E-12 | 1.00E-11 |
| AB57_0778 |       | fatty acid desaturase                                        | -0.637938147 | 0.000181 | 0.00041  |
| AB57_0779 |       | transporter                                                  | -0.493927448 | 0.050197 | 0.071025 |
| AB57_0780 |       | transcriptional regulator                                    | -1.009651671 | 5.10E-09 | 2.43E-08 |
| AB57_0781 |       | hypothetical protein                                         | -1.325203927 | 1.10E-16 | 2.12E-15 |
| AB57_0782 |       | 5-methyltetrahydropteroyltriglutamate--homocysteine methyltr | -0.823649318 | 1.17E-06 | 3.93E-06 |
| AB57_0783 |       | 4-hydroxyphenylacetate 3-monooxygenase reductase compone     | -0.70230374  | 1.02E-09 | 5.61E-09 |
| AB57_0784 |       | transcriptional regulator, TetR family                       | -0.664497168 | 0.007415 | 0.01251  |
| AB57_0785 |       | hypothetical protein                                         | -0.531667005 | 3.06E-07 | 1.11E-06 |
| AB57_0786 |       | hypothetical protein                                         | -0.442629876 | 0.000153 | 0.000351 |
| AB57_0787 |       | hypothetical protein                                         | -0.146723159 | 0.247273 | 0.302449 |
| AB57_0788 |       | hypothetical protein                                         | -0.579272251 | 2.46E-07 | 9.09E-07 |
| AB57_0789 |       | transcriptional regulator, LysR family                       | -1.083985985 | 5.34E-16 | 9.06E-15 |
| AB57_0790 |       | hypothetical protein                                         | -0.557947862 | 0.000127 | 0.000297 |
| AB57_0791 |       | hypothetical protein                                         | -1.221994462 | 2.02E-11 | 1.49E-10 |
| AB57_0792 |       | ribonucleotide-diphosphate reductase subunit beta            | 0.644222801  | 0.00048  | 0.001008 |
| AB57_0793 |       | hypothetical protein                                         | 0.675015355  | 5.83E-06 | 1.72E-05 |
| AB57_0794 |       | ribonucleotide-diphosphate reductase subunit alpha           | 1.060644822  | 4.45E-08 | 1.84E-07 |
| AB57_0796 |       | two-component system response regulator protein              | -0.26876174  | 0.052068 | 0.073419 |
| AB57_0797 |       | two-component system sensor kinase protein                   | 0.010716431  | 0.934446 | 0.946468 |
| AB57_0798 |       | hypothetical protein                                         | -0.835755807 | 6.04E-09 | 2.85E-08 |
| AB57_0799 |       | diguanylate cyclase                                          | -0.648462453 | 4.19E-08 | 1.74E-07 |
| AB57_0800 | nuoA  | NADH dehydrogenase I chain A                                 | 0.613968283  | 9.10E-05 | 0.000218 |
| AB57_0801 | nuoB  | NADH dehydrogenase subunit B                                 | 0.830260203  | 7.22E-07 | 2.49E-06 |
| AB57_0802 | nuoCD | bifunctional NADH:ubiquinone oxidoreductase subunit C/D      | 0.97908246   | 1.27E-06 | 4.22E-06 |
| AB57_0803 | nuoE  | NADH dehydrogenase subunit E                                 | 0.797541797  | 1.65E-05 | 4.49E-05 |
| AB57_0804 | nuoF  | NADH dehydrogenase I chain F                                 | 0.662944133  | 0.000288 | 0.000629 |
| AB57_0805 | nuoG  | NADH dehydrogenase subunit G                                 | 0.322868443  | 0.064334 | 0.089119 |
| AB57_0806 | nuoH  | NADH dehydrogenase subunit H                                 | 0.435706128  | 0.012128 | 0.019537 |
| AB57_0807 | nuoI  | NADH dehydrogenase subunit I                                 | 0.455079416  | 0.006303 | 0.010802 |
| AB57_0808 | nuoJ  | NADH dehydrogenase I chain J                                 | 0.404232258  | 0.016855 | 0.026237 |
| AB57_0809 | nuoK  | NADH dehydrogenase I chain K                                 | 0.50780203   | 0.000819 | 0.001654 |
| AB57_0810 | nuoL  | NADH dehydrogenase subunit L                                 | 0.452731426  | 0.013884 | 0.022076 |
| AB57_0811 | nuoM  | NADH dehydrogenase subunit M                                 | 0.266299785  | 0.124818 | 0.162158 |
| AB57_0812 | nuoN  | NADH dehydrogenase I chain N                                 | 0.14519787   | 0.389703 | 0.450031 |
| AB57_0813 | upp   | uracil phosphoribosyltransferase                             | 0.067387969  | 0.642904 | 0.689292 |
| AB57_0814 |       | putative cold shock protein                                  | 0.519323586  | 1.45E-05 | 3.98E-05 |
| AB57_0815 |       | putative cold shock protein                                  | -0.240628456 | 0.055558 | 0.077954 |
| AB57_0816 |       | transcriptional regulator, LysR family                       | 0.109176655  | 0.272819 | 0.329664 |
| AB57_0817 |       | ferredoxin-NADP reductase                                    | 0.038263413  | 0.727172 | 0.766864 |
| AB57_0818 |       | hypothetical protein                                         | 1.079205872  | 5.14E-17 | 1.04E-15 |
| AB57_0819 |       | hypothetical protein                                         | -0.646432051 | 5.00E-05 | 0.000125 |
| AB57_0820 |       | hypothetical protein                                         | -0.449308715 | 0.004625 | 0.008118 |
| AB57_0821 |       | hypothetical protein                                         | -1.12298972  | 1.79E-20 | 6.31E-19 |
| AB57_0822 |       | hypothetical protein                                         | 0.13717167   | 0.268489 | 0.324962 |
| AB57_0823 |       | 1-aminocyclopropane-1-carboxylate deaminase                  | -0.433562827 | 0.000796 | 0.001615 |
| AB57_0824 |       | secretion protein HlyD                                       | -0.455502109 | 8.61E-06 | 2.47E-05 |
| AB57_0825 |       | major facilitator superfamily                                | -0.511394729 | 0.000816 | 0.001649 |
| AB57_0826 |       | transcriptional regulator TetR/AcrR family                   | -0.314381019 | 0.03708  | 0.05395  |
| AB57_0827 |       | lysine exporter protein                                      | -0.395240953 | 0.001189 | 0.002328 |
| AB57_0828 |       | hypothetical protein                                         | -0.524746358 | 0.000322 | 0.000696 |
| AB57_0829 | metG  | methionyl-tRNA synthetase                                    | 1.936647044  | 2.19E-15 | 3.31E-14 |
| AB57_0830 |       | hypothetical protein                                         | -0.755179418 | 2.21E-07 | 8.20E-07 |
| AB57_0831 |       | putative ATP-binding protein                                 | 0.077992876  | 0.48761  | 0.547113 |
| AB57_0832 | mtnN  | 5'-methylthioadenosine/S-adenosylhomocysteine nucleosidase   | 0.135234485  | 0.34528  | 0.405439 |

|           |      |                                                        |              |          |          |
|-----------|------|--------------------------------------------------------|--------------|----------|----------|
| AB57_0833 |      | hypothetical protein                                   | -0.387230784 | 0.001059 | 0.002096 |
| AB57_0834 |      | amino acid efflux pump, RhtB family                    | -1.012039437 | 5.58E-11 | 3.80E-10 |
| AB57_0835 | dcd  | deoxycytidine triphosphate deaminase                   | 0.662517164  | 8.04E-07 | 2.76E-06 |
| AB57_0836 |      | hypothetical protein                                   | -0.683111815 | 5.66E-07 | 1.99E-06 |
| AB57_0837 |      | hypothetical protein                                   | -0.681850671 | 7.73E-06 | 2.24E-05 |
| AB57_0838 |      | hypothetical protein                                   | -0.752102032 | 3.95E-10 | 2.31E-09 |
| AB57_0839 |      | hypothetical protein                                   | -0.579717297 | 1.72E-07 | 6.50E-07 |
| AB57_0840 |      | hypothetical protein                                   | -0.310056484 | 0.017776 | 0.027578 |
| AB57_0841 |      | hypothetical protein                                   | -1.123741868 | 9.15E-17 | 1.79E-15 |
| AB57_0842 |      | tRNA-dihydrouridine synthase C                         | 1.085732849  | 1.42E-15 | 2.20E-14 |
| AB57_0843 |      | cytochrome c assembly protein                          | -1.479796597 | 1.32E-21 | 6.09E-20 |
| AB57_0844 | ffh  | signal recognition particle protein                    | 0.818016481  | 8.49E-07 | 2.90E-06 |
| AB57_0845 |      | pantothenate kinase                                    | 0.026301868  | 0.803403 | 0.836643 |
| AB57_0846 |      | biotin-[acetyl-CoA-carboxylase] ligase                 | -0.302999939 | 0.011147 | 0.018074 |
| AB57_0847 |      | hypothetical protein                                   | -0.344403758 | 0.000456 | 0.000962 |
| AB57_0848 |      | transcriptional regulator, GntR family                 | -0.752766485 | 4.87E-09 | 2.35E-08 |
| AB57_0849 | smc  | chromosome segregation protein SMC                     | -0.090462021 | 0.437656 | 0.498869 |
| AB57_0850 | zipA | cell division protein ZipA                             | -0.41354162  | 0.003574 | 0.00642  |
| AB57_0851 | ligA | DNA ligase, NAD-dependent                              | 0.818536454  | 8.38E-08 | 3.34E-07 |
| AB57_0852 | bfr  | bacterioferritin                                       | 0.35521714   | 0.017419 | 0.027081 |
| AB57_0853 |      | major facilitator superfamily MFS_1                    | 1.112771568  | 1.26E-05 | 3.51E-05 |
| AB57_0854 |      | trehalose-6-phosphate synthase                         | -0.646283662 | 1.41E-06 | 4.70E-06 |
| AB57_0855 | otsB | trehalose-phosphatase                                  | -1.383341213 | 1.52E-23 | 8.92E-22 |
| AB57_0856 |      | biotin biosynthesis protein BioH                       | -0.269816108 | 0.025419 | 0.038248 |
| AB57_0857 | bioA | adenosylmethionine-8-amino-7-oxononanoate transaminase | 0.516940615  | 2.15E-06 | 6.86E-06 |
| AB57_0860 | bioC | biotin biosynthesis protein BioC                       | 0.903543707  | 2.62E-09 | 1.33E-08 |
| AB57_0861 | bioD | dithiobiotin synthetase                                | 1.136301512  | 7.32E-16 | 1.22E-14 |
| AB57_0862 |      | ribosomal large subunit pseudouridine synthase B       | 0.706381102  | 2.51E-05 | 6.66E-05 |
| AB57_0863 | scpB | chromosome segregation and condensation protein ScpB   | 0.523926104  | 4.52E-05 | 0.000114 |
| AB57_0864 | scpA | chromosome segregation and condensation protein ScpA   | 0.414095746  | 0.000225 | 0.000502 |
| AB57_0865 |      | Sua5/YciO/YrdC/Ywlc family protein                     | -0.253286779 | 0.012636 | 0.020308 |
| AB57_0866 |      | hypothetical protein                                   | -0.554166153 | 7.49E-05 | 0.000181 |
| AB57_0869 | rpmF | 50S ribosomal protein L32                              | 0.603478055  | 0.000254 | 0.00056  |
| AB57_0870 | fabD | malonyl CoA-acyl carrier protein transacylase          | 1.510080507  | 2.14E-21 | 9.19E-20 |
| AB57_0871 | fabG | 3-oxoacyl-(acyl-carrier-protein) reductase             | 1.537459865  | 3.89E-20 | 1.27E-18 |
| AB57_0872 | acpP | acyl carrier protein                                   | 0.784014214  | 1.22E-06 | 4.07E-06 |
| AB57_0873 |      | peptidoglycan-binding LysM                             | -0.849052439 | 1.41E-08 | 6.30E-08 |
| AB57_0874 |      | putative phosphomethylpyrimidine kinase                | 0.485754075  | 0.000149 | 0.000343 |
| AB57_0875 |      | 5'-nucleotidase                                        | 0.07942231   | 0.523099 | 0.581396 |
| AB57_0876 | ribB | 3,4-dihydroxy-2-butanone 4-phosphate synthase          | 0.134721253  | 0.430287 | 0.491377 |
| AB57_0877 |      | hypothetical protein                                   | -0.588931237 | 7.10E-06 | 2.08E-05 |
| AB57_0878 |      | hypothetical protein                                   | -0.683241575 | 9.95E-11 | 6.41E-10 |
| AB57_0879 | panD | aspartate alpha-decarboxylase                          | 0.936515841  | 7.15E-12 | 5.77E-11 |
| AB57_0880 | pth  | peptidyl-tRNA hydrolase                                | 1.308946059  | 1.37E-12 | 1.26E-11 |
| AB57_0881 |      | 50S ribosomal protein L25                              | 0.82118569   | 7.05E-05 | 0.000171 |
| AB57_0882 |      | ribose-phosphate pyrophosphokinase                     | 1.649444048  | 4.26E-14 | 4.91E-13 |
| AB57_0883 | ispE | 4-diphosphocytidyl-2-C-methyl-D-erythritol kinase      | 1.107747104  | 2.83E-11 | 2.03E-10 |
| AB57_0884 | lolB | outer membrane lipoprotein LolB                        | 0.13023942   | 0.245764 | 0.300902 |
| AB57_0885 |      | hypothetical protein                                   | -0.776612835 | 3.71E-08 | 1.55E-07 |
| AB57_0886 | dnaG | DNA primase                                            | -0.250788671 | 0.022589 | 0.034409 |
| AB57_0887 | hemA | glutamyl-tRNA reductase                                | 0.040729155  | 0.716012 | 0.757144 |
| AB57_0888 |      | putative competence protein                            | 0.713148593  | 5.53E-06 | 1.64E-05 |
| AB57_0889 |      | ribosomal large subunit pseudouridine synthase D       | 0.510132133  | 0.000161 | 0.000367 |
| AB57_0890 |      | hypothetical protein                                   | 0.258498821  | 0.029974 | 0.044594 |
| AB57_0891 |      | NADPH-dependent fmn reductase                          | -0.053765811 | 0.620039 | 0.668847 |
| AB57_0892 | smpB | SsrA-binding protein                                   | 0.049172762  | 0.645922 | 0.691725 |
| AB57_0893 | coaD | pantetheine-phosphate adenyltransferase                | -0.311165358 | 0.00339  | 0.006103 |
| AB57_0894 |      | ferredoxin                                             | -0.398502287 | 0.000169 | 0.000385 |

|           |      |                                                   |              |          |          |
|-----------|------|---------------------------------------------------|--------------|----------|----------|
| AB57_0895 |      | hypothetical protein                              | -0.221820935 | 0.067749 | 0.0935   |
| AB57_0896 |      | transcriptional regulator, LysR family            | -0.361287864 | 0.022358 | 0.034113 |
| AB57_0897 |      | tartrate dehydrogenase                            | -0.606409631 | 3.49E-05 | 9.01E-05 |
| AB57_0898 |      | putative transporter                              | -0.397384217 | 0.000719 | 0.001468 |
| AB57_0899 |      | lipolytic enzyme                                  | -0.263234754 | 0.011661 | 0.018841 |
| AB57_0900 |      | dioxygenase alpha subunit                         | 0.058528776  | 0.627569 | 0.675632 |
| AB57_0901 |      | succinate-semialdehyde dehydrogenase (NADP+)      | 0.183108203  | 0.108316 | 0.142521 |
| AB57_0904 |      | hypothetical protein                              | -0.866448133 | 9.01E-10 | 4.99E-09 |
| AB57_0905 | nadE | glutamine-dependent NAD+ synthetase               | 0.406024734  | 0.006045 | 0.010393 |
| AB57_0906 |      | hypothetical protein                              | -0.716006255 | 2.02E-07 | 7.53E-07 |
| AB57_0907 |      | pirin domain protein                              | -1.035587975 | 4.16E-14 | 4.81E-13 |
| AB57_0908 |      | hypothetical protein                              | 0.555604186  | 8.87E-06 | 2.54E-05 |
| AB57_0909 |      | 3-oxoacyl-[acyl-carrier-protein] synthase 1       | 0.801705719  | 1.63E-06 | 5.37E-06 |
| AB57_0910 |      | hypothetical protein                              | -0.923601197 | 1.61E-08 | 7.15E-08 |
| AB57_0911 | rpsL | 30S ribosomal protein S12                         | 1.357396349  | 3.74E-12 | 3.19E-11 |
| AB57_0912 | rpsG | 30S ribosomal protein S7                          | 1.011673396  | 8.97E-08 | 3.57E-07 |
| AB57_0913 | fusA | elongation factor G                               | 1.092090964  | 1.32E-09 | 7.11E-09 |
| AB57_0914 | tuf  | elongation factor Tu                              | 0.784079465  | 9.04E-06 | 2.58E-05 |
| AB57_0915 |      | hypothetical protein                              | 0.079434462  | 0.49504  | 0.554541 |
| AB57_0916 |      | transposase subunit                               | -0.827373058 | 5.59E-07 | 1.97E-06 |
| AB57_0917 |      | transposase 1                                     | -0.467759043 | 0.002166 | 0.004045 |
| AB57_0918 |      | putative metal-dependent hydrolase                | -0.340472249 | 0.002023 | 0.003814 |
| AB57_0919 | rimI | ribosomal-protein-alanine acetyltransferase       | 0.114277973  | 0.312783 | 0.371524 |
| AB57_0920 |      | arginyl-tRNA-protein transferase                  | -0.998572691 | 6.26E-12 | 5.09E-11 |
| AB57_0921 | aat  | leucyl/phenylalanyl-tRNA--protein transferase     | -0.623512826 | 8.72E-10 | 4.84E-09 |
| AB57_0922 | trxB | thioredoxin-disulfide reductase                   | 0.604364616  | 2.39E-05 | 6.37E-05 |
| AB57_0923 |      | putative cell division protein                    | -0.133633052 | 0.321986 | 0.381231 |
| AB57_0924 | ftsK | DNA translocase FtsK                              | -0.002485506 | 0.987455 | 0.989059 |
| AB57_0925 |      | threonine efflux system                           | -0.577829992 | 2.37E-05 | 6.33E-05 |
| AB57_0926 |      | hypothetical protein                              | 1.202659929  | 2.34E-18 | 6.10E-17 |
| AB57_0927 | minE | cell division topological specificity factor MinE | 0.798010743  | 1.83E-06 | 5.96E-06 |
| AB57_0928 | minD | septum site-determining protein MinD              | 0.82877526   | 1.30E-06 | 4.32E-06 |
| AB57_0929 | minC | septum site-determining protein MinC              | 0.984507014  | 4.13E-17 | 8.59E-16 |
| AB57_0930 |      | hypothetical protein                              | 0.403215617  | 0.00021  | 0.000472 |
| AB57_0931 |      | putative acyltransferase                          | 0.636314333  | 7.17E-10 | 4.04E-09 |
| AB57_0932 |      | OmpA/MotB domain protein                          | -0.387563251 | 0.011309 | 0.018304 |
| AB57_0933 |      | ATP-dependent DNA helicase                        | 1.622134408  | 4.80E-15 | 6.86E-14 |
| AB57_0934 |      | deoxyuridine 5'-triphosphate nucleotidohydrolase  | 1.960852709  | 2.16E-30 | 3.99E-28 |
| AB57_0935 |      | phosphomannomutase                                | -0.098317426 | 0.392909 | 0.453415 |
| AB57_0936 | argB | acetylglutamate kinase                            | 0.457971229  | 0.00045  | 0.000951 |
| AB57_0937 |      | hypothetical protein                              | -0.206520557 | 0.140342 | 0.179988 |
| AB57_0938 |      | glutamine amidotransferase, class-II              | -0.656350087 | 1.04E-06 | 3.52E-06 |
| AB57_0939 |      | hypothetical protein                              | -0.474567766 | 0.001791 | 0.003412 |
| AB57_0940 |      | hypothetical protein                              | 0.258178769  | 0.078099 | 0.106299 |
| AB57_0941 |      | hypothetical protein                              | -0.330854922 | 0.25839  | 0.314488 |
| AB57_0942 |      | outer membrane lipoprotein                        | -0.162478002 | 0.138556 | 0.178148 |
| AB57_0943 |      | ferric uptake regulation protein                  | 0.149870481  | 0.267696 | 0.324215 |
| AB57_0944 |      | twitching motility protein                        | 0.003133829  | 0.983386 | 0.986585 |
| AB57_0945 |      | twitching mobility protein                        | -0.332777059 | 0.01552  | 0.024312 |
| AB57_0946 |      | hypothetical protein                              | 0.001266814  | 0.990896 | 0.992236 |
| AB57_0947 |      | ATP-dependent dsDNA exonuclease                   | -0.220343984 | 0.061486 | 0.085622 |
| AB57_0948 |      | ATP-dependent dsDNA exonuclease                   | -0.333237355 | 0.00519  | 0.009043 |
| AB57_0949 |      | hypothetical protein                              | -0.594660608 | 0.000224 | 0.000501 |
| AB57_0950 |      | glyoxalase                                        | -1.013047237 | 1.21E-12 | 1.12E-11 |
| AB57_0951 |      | hypothetical protein                              | -0.052141206 | 0.613262 | 0.662889 |
| AB57_0952 |      | FAD dependent oxidoreductase                      | 0.243805731  | 0.014046 | 0.022277 |
| AB57_0953 |      | hypothetical protein                              | -0.235547027 | 0.028173 | 0.042117 |
| AB57_0954 | hemB | delta-aminolevulinic acid dehydratase             | -0.13454075  | 0.276998 | 0.334059 |

|           |      |                                                   |              |          |          |
|-----------|------|---------------------------------------------------|--------------|----------|----------|
| AB57_0955 |      | hypothetical protein                              | -0.664858112 | 2.07E-06 | 6.62E-06 |
| AB57_0956 |      | RND family multidrug resistance secretion protein | 0.270121272  | 0.081198 | 0.11021  |
| AB57_0957 |      | multidrug resistance protein B                    | 0.374262757  | 0.012173 | 0.019592 |
| AB57_0958 | ggt  | gamma-glutamyltransferase                         | -0.411990756 | 3.33E-05 | 8.65E-05 |
| AB57_0959 |      | integrase                                         | -0.629917816 | 2.88E-07 | 1.05E-06 |
| AB57_0960 |      | hypothetical protein                              | -0.730530762 | 2.04E-09 | 1.06E-08 |
| AB57_0963 |      | gp54 protein                                      | -0.196178602 | 0.427032 | 0.488238 |
| AB57_0964 |      | hypothetical protein                              | -0.413197174 | 0.09445  | 0.125887 |
| AB57_0966 |      | hypothetical protein                              | 1.056947324  | 2.01E-06 | 6.45E-06 |
| AB57_0967 |      | inner membrane protein                            | 0.166743345  | 0.139416 | 0.179111 |
| AB57_0968 |      | single-strand binding protein                     | -0.866093604 | 5.09E-05 | 0.000127 |
| AB57_0969 |      | hypothetical protein                              | -0.783203538 | 3.38E-10 | 2.00E-09 |
| AB57_0970 |      | nucleoid-associated protein                       | 0.047219531  | 0.644116 | 0.690391 |
| AB57_0971 |      | hypothetical protein                              | -0.660798316 | 4.62E-08 | 1.90E-07 |
| AB57_0972 |      | hypothetical protein                              | -0.595012979 | 0.005674 | 0.009806 |
| AB57_0973 |      | hypothetical protein                              | -0.838834644 | 1.80E-06 | 5.86E-06 |
| AB57_0974 |      | KAP P-loop domain protein                         | -0.361185571 | 0.013116 | 0.020963 |
| AB57_0975 |      | hypothetical protein                              | -0.331831151 | 0.001974 | 0.003733 |
| AB57_0976 |      | hypothetical protein                              | -0.370773872 | 0.000978 | 0.001945 |
| AB57_0977 |      | hypothetical protein                              | -0.681186252 | 5.09E-09 | 2.43E-08 |
| AB57_0978 |      | hypothetical protein                              | -0.535733601 | 9.91E-06 | 2.80E-05 |
| AB57_0979 |      | hypothetical protein                              | -0.104121902 | 0.51215  | 0.571114 |
| AB57_0980 |      | putative benzoate transport porin                 | -0.474770656 | 0.038234 | 0.055477 |
| AB57_0981 |      | hypothetical protein                              | -0.135505614 | 0.520545 | 0.579253 |
| AB57_0982 |      | major facilitator superfamily MFS_1               | -0.210979852 | 0.135707 | 0.174831 |
| AB57_0983 |      | dihydrodipicolinate synthetase                    | -0.177465874 | 0.331687 | 0.391589 |
| AB57_0984 |      | transcriptional regulator, LysR family            | -0.273757062 | 0.070597 | 0.09696  |
| AB57_0985 |      | RNA polymerase sigma factor FecI                  | -0.127646982 | 0.419568 | 0.480917 |
| AB57_0986 |      | putative transmembrane sensor protein FecR        | 0.152267093  | 0.310468 | 0.369249 |
| AB57_0987 |      | hypothetical protein                              | -0.464575212 | 0.003756 | 0.00672  |
| AB57_0988 |      | hypothetical protein                              | -0.646852259 | 0.000112 | 0.000264 |
| AB57_0989 |      | hypothetical protein                              | -0.57719434  | 0.000282 | 0.000618 |
| AB57_0990 |      | TonB family protein                               | -0.533094869 | 0.003417 | 0.00615  |
| AB57_0991 |      | heme oxygenase                                    | -0.429574285 | 0.0151   | 0.023745 |
| AB57_0992 |      | hypothetical protein                              | -0.287197324 | 0.260777 | 0.31708  |
| AB57_0994 |      | hypothetical protein                              | -0.811269082 | 3.88E-09 | 1.92E-08 |
| AB57_0995 |      | hypothetical protein                              | -0.842125971 | 1.01E-07 | 3.96E-07 |
| AB57_0996 |      | hypothetical protein                              | -0.649730758 | 1.18E-05 | 3.29E-05 |
| AB57_0997 |      | hypothetical protein                              | -0.559813885 | 2.13E-06 | 6.82E-06 |
| AB57_0998 |      | arginine/ornithine antiporter                     | -1.347789566 | 8.83E-15 | 1.17E-13 |
| AB57_0999 |      | homocysteine S-methyltransferase family protein   | 0.253971886  | 0.023576 | 0.035765 |
| AB57_1000 |      | hypothetical protein                              | -0.447438275 | 0.00036  | 0.000769 |
| AB57_1001 | mgo  | malate:quinone oxidoreductase                     | 0.882466059  | 2.63E-05 | 6.95E-05 |
| AB57_1002 | betA | choline dehydrogenase                             | 0.646510628  | 5.57E-05 | 0.000138 |
| AB57_1003 | betB | betaine aldehyde dehydrogenase                    | 1.408033569  | 3.87E-14 | 4.51E-13 |
| AB57_1004 | betI | transcriptional regulator BetI                    | 1.122216573  | 1.30E-12 | 1.20E-11 |
| AB57_1005 |      | high-affinity choline transport protein           | -0.332390191 | 0.00986  | 0.016193 |
| AB57_1006 |      | choline transport protein BetT                    | 1.05405983   | 1.61E-07 | 6.10E-07 |
| AB57_1007 |      | MarC family integral membrane protein             | 0.516261565  | 0.003055 | 0.005546 |
| AB57_1008 |      | thioesterase superfamily protein                  | 0.470884207  | 6.44E-06 | 1.90E-05 |
| AB57_1009 |      | hypothetical protein                              | -0.926899974 | 8.84E-09 | 4.07E-08 |
| AB57_1010 |      | putative cobalamin synthesis protein              | -0.035793019 | 0.8074   | 0.839859 |
| AB57_1011 |      | aerobic C4-dicarboxylate transport protein        | -0.329129767 | 0.026046 | 0.039143 |
| AB57_1012 |      | YaeQ protein                                      | 1.656927583  | 1.88E-19 | 5.74E-18 |
| AB57_1013 |      | peptidyl-prolyl cis-trans isomerase               | 0.135192743  | 0.213578 | 0.26447  |
| AB57_1014 |      | polysaccharide deacetylase                        | 0.254928092  | 0.017853 | 0.027673 |
| AB57_1015 |      | N-glycosyltransferase                             | 0.574392056  | 7.03E-07 | 2.43E-06 |
| AB57_1016 |      | hypothetical protein                              | 0.570082248  | 1.52E-05 | 4.17E-05 |

|           |       |                                                             |              |          |          |
|-----------|-------|-------------------------------------------------------------|--------------|----------|----------|
| AB57_1017 |       | enoyl-CoA hydratase                                         | -0.724693474 | 9.57E-08 | 3.78E-07 |
| AB57_1018 |       | nicotinamide mononucleotide transporter PnuC                | 0.290402449  | 0.010378 | 0.016931 |
| AB57_1019 |       | hypothetical protein                                        | -0.360722921 | 0.0446   | 0.063616 |
| AB57_1020 |       | putative transcriptional regulator                          | -0.003702395 | 0.972074 | 0.977888 |
| AB57_1021 |       | rieske (2Fe-2S) protein                                     | 0.534295994  | 0.003882 | 0.006919 |
| AB57_1022 |       | hypothetical protein                                        | 0.515294202  | 0.010015 | 0.01639  |
| AB57_1023 |       | rieske (2Fe-2S) protein                                     | 0.671820059  | 0.000434 | 0.000921 |
| AB57_1024 |       | short chain dehydrogenase                                   | 0.763768447  | 4.00E-05 | 0.000102 |
| AB57_1025 |       | glyoxalase/bleomycin resistance protein/dioxygenase         | 0.2708196    | 0.032447 | 0.047811 |
| AB57_1026 |       | FAD-dependent pyridine nucleotide-disulphide oxidoreductase | 0.090368432  | 0.432238 | 0.493149 |
| AB57_1027 |       | major facilitator superfamily MFS_1                         | 0.248215402  | 0.016229 | 0.025369 |
| AB57_1028 |       | hypothetical protein                                        | 0.322610141  | 0.00427  | 0.007559 |
| AB57_1029 |       | putative hydrolase                                          | 0.598028584  | 1.27E-07 | 4.91E-07 |
| AB57_1030 |       | short chain dehydrogenase                                   | 0.745511646  | 4.38E-10 | 2.54E-09 |
| AB57_1031 |       | L-aspartate dehydrogenase                                   | 0.828764874  | 1.49E-12 | 1.35E-11 |
| AB57_1032 |       | betaine aldehyde dehydrogenase                              | 0.795118747  | 4.74E-11 | 3.26E-10 |
| AB57_1033 |       | hypothetical protein                                        | 0.317409536  | 0.02003  | 0.030815 |
| AB57_1034 |       | hypothetical protein                                        | -0.508628247 | 2.20E-05 | 5.90E-05 |
| AB57_1035 |       | major facilitator family transporter                        | -0.559909278 | 6.96E-06 | 2.04E-05 |
| AB57_1037 | def   | peptide deformylase                                         | -0.506640138 | 0.000206 | 0.000463 |
| AB57_1038 |       | glutaminase                                                 | 0.409938086  | 4.24E-05 | 0.000108 |
| AB57_1039 |       | transcriptional Regulator, AraC family                      | 0.212011151  | 0.095349 | 0.126932 |
| AB57_1040 | fsr   | fosmidomycin resistance protein                             | 0.410186007  | 0.00653  | 0.011145 |
| AB57_1041 |       | aldose 1-epimerase                                          | -0.402635925 | 4.34E-05 | 0.00011  |
| AB57_1042 |       | hypothetical protein                                        | -0.57056595  | 6.68E-05 | 0.000163 |
| AB57_1043 |       | transcriptional regulatory protein                          | -0.552246581 | 7.28E-05 | 0.000176 |
| AB57_1044 |       | 3-oxoacyl-[acyl-carrier-protein] reductase                  | -0.280102834 | 0.037361 | 0.05432  |
| AB57_1045 |       | major facilitator superfamily MFS_1                         | -0.020328011 | 0.871304 | 0.895009 |
| AB57_1046 |       | transketolase, alpha subunit                                | 0.216216375  | 0.093009 | 0.124371 |
| AB57_1047 |       | transketolase, beta subunit                                 | 0.198720209  | 0.151253 | 0.192713 |
| AB57_1048 | methH | B12-dependent methionine synthase                           | 1.436779633  | 1.83E-10 | 1.13E-09 |
| AB57_1050 |       | phosphate transporter                                       | 1.064936752  | 1.36E-07 | 5.22E-07 |
| AB57_1052 | dsdA  | D-serine dehydratase                                        | 0.659139016  | 7.28E-06 | 2.13E-05 |
| AB57_1053 |       | hypothetical protein                                        | 0.561631377  | 1.61E-05 | 4.40E-05 |
| AB57_1054 |       | hypothetical protein                                        | -1.370655196 | 4.27E-21 | 1.74E-19 |
| AB57_1055 |       | hypothetical protein                                        | -0.52025795  | 0.00282  | 0.005149 |
| AB57_1056 |       | arylsulfatase                                               | -0.77969167  | 0.009906 | 0.016261 |
| AB57_1057 |       | rhomboid family protein                                     | -1.111374867 | 1.77E-20 | 6.30E-19 |
| AB57_1058 | yhgI  | IscR-regulated protein YhgI                                 | -0.211106362 | 0.061073 | 0.085144 |
| AB57_1059 |       | outer membrane receptor FepA                                | -0.469684931 | 1.56E-05 | 4.26E-05 |
| AB57_1060 |       | hypothetical protein                                        | 0.163767579  | 0.129151 | 0.167318 |
| AB57_1063 |       | carbonate dehydratase                                       | 0.425245633  | 4.21E-05 | 0.000107 |
| AB57_1064 |       | acyl-CoA thioesterase                                       | -0.597250763 | 0.000557 | 0.001155 |
| AB57_1065 |       | lipoprotein-releasing system ATP-binding protein LolD       | -0.239576688 | 0.193068 | 0.241662 |
| AB57_1066 |       | efflux ABC transporter, permease protein                    | -0.533988347 | 3.07E-07 | 1.11E-06 |
| AB57_1067 |       | rhomboid family protein                                     | -0.256687293 | 0.028798 | 0.04293  |
| AB57_1068 | mtgA  | monofunctional biosynthetic peptidoglycan transglycosylase  | 0.46995528   | 2.19E-05 | 5.87E-05 |
| AB57_1069 | ppk   | polyphosphate kinase                                        | 0.500448063  | 0.00035  | 0.000751 |
| AB57_1070 |       | hypothetical protein                                        | -0.602000049 | 3.71E-07 | 1.33E-06 |
| AB57_1071 | estR  | transcriptional regulator EstR, HTH-type                    | 0.067659857  | 0.617671 | 0.666876 |
| AB57_1072 | estB  | alpha/beta hydrolase fold protein EstB                      | -0.17260858  | 0.093328 | 0.124752 |
| AB57_1073 |       | rubredoxin reductase                                        | -0.132598505 | 0.235535 | 0.289432 |
| AB57_1074 |       | rubredoxin                                                  | -0.278289023 | 0.034577 | 0.050568 |
| AB57_1075 |       | hypothetical protein                                        | -1.13008377  | 1.42E-13 | 1.49E-12 |
| AB57_1076 |       | hypothetical protein                                        | -0.887440102 | 4.62E-09 | 2.25E-08 |
| AB57_1077 | lysS  | lysyl-tRNA synthetase                                       | 2.002970779  | 1.80E-14 | 2.21E-13 |
| AB57_1078 |       | hypothetical protein                                        | 0.996452789  | 1.75E-11 | 1.31E-10 |
| AB57_1080 |       | sulfate adenyltransferase subunit 2                         | -0.137267274 | 0.425135 | 0.486544 |

|           |      |                                                                  |              |          |          |
|-----------|------|------------------------------------------------------------------|--------------|----------|----------|
| AB57_1081 |      | sulfate adenylyltransferase subunit 1                            | 0.500808     | 0.001795 | 0.003416 |
| AB57_1082 |      | hypothetical protein                                             | 0.324563036  | 0.008138 | 0.013625 |
| AB57_1083 |      | hypothetical protein                                             | -0.012222983 | 0.919815 | 0.934695 |
| AB57_1084 |      | citrate transporter                                              | 0.146975141  | 0.372533 | 0.432498 |
| AB57_1085 |      | hypothetical protein                                             | -0.238921042 | 0.026912 | 0.040378 |
| AB57_1086 |      | transcriptional regulator, LysR family                           | 0.244791836  | 0.06892  | 0.094902 |
| AB57_1087 |      | isocitrate lyase                                                 | -0.186076512 | 0.247413 | 0.302521 |
| AB57_1088 |      | lipoprotein                                                      | -0.956913844 | 8.50E-10 | 4.72E-09 |
| AB57_1089 |      | hypothetical protein                                             | -0.087637869 | 0.427017 | 0.488238 |
| AB57_1091 | ureD | urease accessory protein UreD                                    | -0.408616088 | 0.030389 | 0.045139 |
| AB57_1092 | ureA | urease subunit gamma                                             | -0.252194921 | 0.195342 | 0.24426  |
| AB57_1093 | ureB | urease, beta subunit                                             | -0.272598509 | 0.261841 | 0.318136 |
| AB57_1094 | ureC | urease subunit alpha                                             | -0.141722556 | 0.201336 | 0.250823 |
| AB57_1095 | ureE | urease accessory protein UreE                                    | 0.044344235  | 0.717846 | 0.758649 |
| AB57_1096 | ureF | urease accessory protein F                                       | 0.577877433  | 5.34E-06 | 1.59E-05 |
| AB57_1097 | ureG | urease accessory protein G                                       | 0.456148571  | 0.000495 | 0.001037 |
| AB57_1098 | ureJ | urease accessory protein J                                       | 0.311989283  | 0.022954 | 0.034893 |
| AB57_1099 |      | putative methyltransferase                                       | -0.241268802 | 0.034299 | 0.050201 |
| AB57_1100 | mrda | penicillin-binding protein 2                                     | 0.911062935  | 3.81E-07 | 1.37E-06 |
| AB57_1101 |      | hypothetical protein                                             | -0.374799491 | 0.002199 | 0.004096 |
| AB57_1102 |      | hypothetical protein                                             | 0.388694211  | 0.003602 | 0.006463 |
| AB57_1103 |      | adenylate kinase                                                 | 0.82736056   | 2.54E-09 | 1.30E-08 |
| AB57_1104 |      | hypothetical protein                                             | 1.166035822  | 2.65E-13 | 2.70E-12 |
| AB57_1105 | nth  | endonuclease III                                                 | 0.363884858  | 0.004338 | 0.007672 |
| AB57_1106 |      | electron transport complex, rnfBcdg type, B subunit              | 0.536117977  | 2.00E-05 | 5.38E-05 |
| AB57_1107 |      | glutamate dehydrogenase                                          | 1.938864143  | 1.06E-24 | 7.54E-23 |
| AB57_1108 |      | hypothetical protein                                             | 0.791695223  | 6.66E-08 | 2.70E-07 |
| AB57_1109 |      | extradiol ring-cleavage dioxygenase, class III enzyme, subunit B | -0.146390438 | 0.307799 | 0.366781 |
| AB57_1110 |      | hypothetical protein                                             | -0.349018543 | 0.007804 | 0.013125 |
| AB57_1111 | lon  | ATP-dependent protease La                                        | -0.436852367 | 0.00613  | 0.01053  |
| AB57_1112 |      | 5-formyltetrahydrofolate cyclo-ligase                            | -0.756123962 | 2.77E-10 | 1.66E-09 |
| AB57_1113 |      | hypothetical protein                                             | -0.757612413 | 1.01E-06 | 3.43E-06 |
| AB57_1115 |      | hypothetical protein                                             | -0.831439851 | 3.25E-09 | 1.63E-08 |
| AB57_1116 |      | hypothetical protein                                             | -0.321138041 | 0.005047 | 0.008812 |
| AB57_1117 |      | hypothetical protein                                             | 0.017467984  | 0.899208 | 0.917559 |
| AB57_1118 |      | YecA family protein                                              | 1.02907072   | 1.05E-14 | 1.37E-13 |
| AB57_1119 |      | X-Pro aminopeptidase                                             | 0.319569496  | 0.027247 | 0.040848 |
| AB57_1120 |      | 2-octaprenyl-6-methoxyphenol hydroxylase, FAD/NAD UbiH           | 0.539546739  | 4.59E-05 | 0.000116 |
| AB57_1121 |      | ubiquinone biosynthesis hydroxylase, UbiH/UbiF/VisC/COQ6 far     | 0.592444836  | 3.20E-05 | 8.33E-05 |
| AB57_1123 |      | hypothetical protein                                             | -0.229862596 | 0.022702 | 0.034566 |
| AB57_1124 |      | transcriptional regulator, MerR family                           | -0.029289974 | 0.823002 | 0.852971 |
| AB57_1125 |      | Co/Zn/Cd efflux system                                           | -0.4932889   | 7.30E-06 | 2.13E-05 |
| AB57_1126 |      | lysine exporter protein ArgO                                     | 0.328867857  | 0.009606 | 0.015811 |
| AB57_1127 |      | chromosome replication initiation inhibitor protein              | -0.376970365 | 0.016949 | 0.026371 |
| AB57_1128 |      | hypothetical protein                                             | -0.281960699 | 0.14307  | 0.183106 |
| AB57_1129 |      | hypothetical protein                                             | 0.611017755  | 3.16E-07 | 1.14E-06 |
| AB57_1130 |      | hypothetical protein                                             | -0.503425153 | 0.004569 | 0.008028 |
| AB57_1131 |      | hypothetical protein                                             | 0.111571622  | 0.356171 | 0.415982 |
| AB57_1132 |      | esterase                                                         | 0.378456333  | 0.000366 | 0.000782 |
| AB57_1133 |      | NADH pyrophosphatase                                             | 0.492292903  | 6.97E-06 | 2.05E-05 |
| AB57_1134 |      | hypothetical protein                                             | -0.284834913 | 0.005982 | 0.010291 |
| AB57_1135 |      | DNA polymerase III, epsilon subunit                              | 0.680606521  | 3.30E-08 | 1.40E-07 |
| AB57_1136 |      | lytic transglycosylase                                           | 0.631590148  | 0.000342 | 0.000736 |
| AB57_1137 |      | extracellular solute-binding protein, family 5                   | 0.368161371  | 0.000922 | 0.001847 |
| AB57_1138 |      | peptide ABC transporter, permease protein                        | -0.22507226  | 0.062036 | 0.086259 |
| AB57_1139 |      | peptide ABC transporter, permease protein                        | -0.39805677  | 0.000455 | 0.000959 |
| AB57_1140 |      | glutathione import ATP-binding protein GsiA                      | -0.339285186 | 0.004543 | 0.007994 |
| AB57_1141 |      | oxidoreductase, FAD/FMN-binding                                  | -0.476399488 | 0.001033 | 0.002048 |

|           |      |                                                                  |              |          |          |
|-----------|------|------------------------------------------------------------------|--------------|----------|----------|
| AB57_1142 |      | hypothetical protein                                             | -0.8309791   | 1.30E-07 | 5.00E-07 |
| AB57_1143 |      | hypothetical protein                                             | -0.674422    | 1.98E-06 | 6.38E-06 |
| AB57_1144 |      | hypothetical protein                                             | -0.678537617 | 1.69E-05 | 4.59E-05 |
| AB57_1145 |      | hypothetical protein                                             | -0.324896655 | 0.007255 | 0.012274 |
| AB57_1146 |      | hypothetical protein                                             | -0.53400837  | 0.00064  | 0.001313 |
| AB57_1147 |      | hypothetical protein                                             | -0.615495876 | 4.87E-07 | 1.72E-06 |
| AB57_1148 |      | TonB-dependent siderophore receptor                              | 0.911453247  | 3.37E-06 | 1.04E-05 |
| AB57_1149 | rnt  | ribonuclease T                                                   | -0.269484432 | 0.013292 | 0.021226 |
| AB57_1150 | pyrC | dihydroorotase                                                   | 0.423721128  | 0.001696 | 0.003242 |
| AB57_1151 |      | hypothetical protein                                             | -0.758874962 | 3.41E-12 | 2.93E-11 |
| AB57_1152 | argG | argininosuccinate synthase                                       | 2.415834482  | 1.81E-21 | 7.97E-20 |
| AB57_1153 |      | 2,4-dienoyl-CoA reductase                                        | -1.10949277  | 6.37E-13 | 6.14E-12 |
| AB57_1154 |      | hypothetical protein                                             | -0.038577892 | 0.743773 | 0.781363 |
| AB57_1155 |      | hypothetical protein                                             | -0.550874428 | 0.008934 | 0.014816 |
| AB57_1157 |      | transcriptional regulator, TetR family                           | -0.868528114 | 7.81E-05 | 0.000189 |
| AB57_1158 |      | Rhs element Vgr protein, putative                                | 0.362724407  | 0.011506 | 0.018599 |
| AB57_1159 |      | YD repeat protein                                                | -0.05101309  | 0.750654 | 0.787474 |
| AB57_1160 |      | hypothetical protein                                             | -1.0937907   | 1.08E-19 | 3.36E-18 |
| AB57_1161 |      | hypothetical protein                                             | -0.233139669 | 0.128378 | 0.166491 |
| AB57_1162 |      | hypothetical protein                                             | -0.104162926 | 0.302062 | 0.360758 |
| AB57_1163 |      | hypothetical protein                                             | -0.437656265 | 0.000285 | 0.000624 |
| AB57_1164 |      | hypothetical protein                                             | -0.013421292 | 0.904086 | 0.922028 |
| AB57_1165 |      | aromatic amino acid transport protein AroP                       | 0.117446569  | 0.360689 | 0.420729 |
| AB57_1166 |      | FAD dependent oxidoreductase                                     | 1.049404591  | 1.52E-09 | 8.07E-09 |
| AB57_1167 |      | putrescine importer                                              | 0.751410934  | 2.26E-05 | 6.04E-05 |
| AB57_1168 |      | hypothetical protein                                             | -0.50001544  | 2.35E-06 | 7.46E-06 |
| AB57_1169 |      | transcriptional regulator, GntR family                           | 0.19228892   | 0.060616 | 0.084602 |
| AB57_1170 |      | hypothetical protein                                             | -0.575161733 | 2.03E-07 | 7.58E-07 |
| AB57_1171 |      | betaine aldehyde dehydrogenase                                   | -0.488712882 | 1.70E-06 | 5.55E-06 |
| AB57_1172 |      | transcriptional regulator, AsnC family                           | 0.016021586  | 0.911294 | 0.928101 |
| AB57_1173 |      | bifunctional succinylornithine transaminase/acetylornithine trar | 0.135424999  | 0.256699 | 0.312944 |
| AB57_1174 | astA | arginine N-succinyltransferase                                   | -0.797240126 | 5.88E-12 | 4.83E-11 |
| AB57_1175 |      | D-serine/D-alanine/glycine transporter                           | -0.730446839 | 1.76E-09 | 9.22E-09 |
| AB57_1176 |      | hypothetical protein                                             | -0.29982439  | 0.042658 | 0.0612   |
| AB57_1177 |      | hypothetical protein                                             | -0.503338473 | 1.13E-05 | 3.16E-05 |
| AB57_1178 |      | aldehyde dehydrogenase                                           | -0.63379567  | 4.82E-10 | 2.77E-09 |
| AB57_1179 |      | transcriptional regulator, AraC family                           | -0.705959041 | 2.15E-06 | 6.87E-06 |
| AB57_1180 |      | hypothetical protein                                             | -0.460118215 | 5.30E-06 | 1.58E-05 |
| AB57_1181 | garD | galactarate dehydratase                                          | 0.430362431  | 0.009463 | 0.015589 |
| AB57_1182 |      | glucarate transporter                                            | 0.010824167  | 0.947056 | 0.957406 |
| AB57_1183 | gudD | glucarate dehydratase                                            | 0.062460167  | 0.631993 | 0.679168 |
| AB57_1185 | kdgD | 5-dehydro-4-deoxyglucarate dehydratase                           | 0.138503601  | 0.375942 | 0.436045 |
| AB57_1186 |      | NADP-dependent fatty aldehyde dehydrogenase                      | -0.227496737 | 0.035773 | 0.052214 |
| AB57_1187 |      | transcriptional regulator, GntR family                           | -0.177125316 | 0.120724 | 0.157171 |
| AB57_1188 |      | tannase/feruloyl esterase family protein                         | -0.035866987 | 0.75752  | 0.793552 |
| AB57_1190 |      | hypothetical protein                                             | -0.174680106 | 0.540257 | 0.597415 |
| AB57_1191 |      | porin                                                            | -0.182406959 | 0.16281  | 0.206513 |
| AB57_1192 |      | long-chain specific acyl-coa dehydrogenase                       | 0.105971699  | 0.490134 | 0.549377 |
| AB57_1193 |      | feruloyl-CoA synthase                                            | -0.515777492 | 1.15E-06 | 3.87E-06 |
| AB57_1194 |      | aldehyde dehydrogenase                                           | -0.027268251 | 0.818154 | 0.848898 |
| AB57_1195 |      | p-hydroxycinnamoyl CoA hydratase/lyase                           | 0.197686542  | 0.078745 | 0.107038 |
| AB57_1196 |      | putative 3-hydroxyphenylpropionic transporter MhpT               | 0.109894599  | 0.617081 | 0.666433 |
| AB57_1197 |      | transcriptional regulator, MarR-family                           | -0.106128853 | 0.584304 | 0.637314 |
| AB57_1198 |      | transcriptional regulator, GntR family                           | -0.124771703 | 0.372042 | 0.432335 |
| AB57_1199 |      | 2Fe-2S iron-sulfur cluster binding domain protein                | -0.44520316  | 0.000934 | 0.00187  |
| AB57_1200 |      | vanillate O-demethylase oxygenase subunit                        | -0.460162375 | 0.000237 | 0.000527 |
| AB57_1201 |      | vanillate transporter                                            | -0.946955555 | 2.47E-07 | 9.10E-07 |
| AB57_1202 |      | porin                                                            | -0.590083744 | 2.33E-06 | 7.40E-06 |



|           |      |                                                              |              |          |          |
|-----------|------|--------------------------------------------------------------|--------------|----------|----------|
| AB57_1203 |      | GMC oxidoreductase                                           | -0.326495874 | 0.001543 | 0.002963 |
| AB57_1204 |      | acetyl-hydrolase                                             | 1.770288939  | 7.85E-09 | 3.66E-08 |
| AB57_1205 |      | short chain dehydrogenase                                    | 3.226955765  | 1.68E-13 | 1.75E-12 |
| AB57_1206 |      | monooxygenase                                                | 3.685675055  | 8.70E-19 | 2.38E-17 |
| AB57_1207 |      | transcriptional regulator, AraC family                       | -0.191445656 | 0.149153 | 0.190299 |
| AB57_1208 |      | putative transferase                                         | -0.232004369 | 0.176341 | 0.222532 |
| AB57_1209 |      | monooxygenase, flavin-binding family                         | -0.011747155 | 0.918635 | 0.934034 |
| AB57_1210 |      | oxidoreductase short chain dehydrogenase/reductase family    | 0.378048583  | 0.037363 | 0.05432  |
| AB57_1211 |      | hypothetical protein                                         | 0.129005695  | 0.362204 | 0.422229 |
| AB57_1212 |      | transcriptional regulator                                    | -0.73690914  | 1.90E-07 | 7.15E-07 |
| AB57_1213 |      | pirin domain protein                                         | -0.274826612 | 0.041617 | 0.059939 |
| AB57_1214 |      | hypothetical protein                                         | -0.540873025 | 0.009093 | 0.015041 |
| AB57_1215 |      | oxidoreductase short chain dehydrogenase/reductase family    | -0.47930474  | 0.010048 | 0.016436 |
| AB57_1216 |      | monooxygenase, flavin-binding family                         | -0.194899333 | 0.153503 | 0.195444 |
| AB57_1217 |      | hypothetical protein                                         | -0.433209876 | 0.002162 | 0.004039 |
| AB57_1218 |      | xanthine/uracil permease                                     | 1.578456963  | 4.76E-13 | 4.67E-12 |
| AB57_1219 | add  | adenosine deaminase                                          | 2.019392601  | 2.17E-24 | 1.46E-22 |
| AB57_1220 |      | cytochrome B561                                              | -0.881712728 | 1.24E-15 | 1.97E-14 |
| AB57_1221 |      | hypothetical protein                                         | 0.610207017  | 5.19E-05 | 0.000129 |
| AB57_1222 | rnhB | ribonuclease HII                                             | 0.970337961  | 4.96E-12 | 4.11E-11 |
| AB57_1223 | csrA | carbon storage regulator                                     | -0.627367835 | 5.50E-05 | 0.000137 |
| AB57_1224 |      | aspartate kinase                                             | 2.256291423  | 2.99E-20 | 9.98E-19 |
| AB57_1225 |      | hypothetical protein                                         | -0.010361619 | 0.95834  | 0.966965 |
| AB57_1226 |      | hypothetical protein                                         | -0.398770748 | 0.031281 | 0.046351 |
| AB57_1227 |      | hypothetical protein                                         | -0.654950076 | 3.44E-06 | 1.06E-05 |
| AB57_1228 |      | hypothetical protein                                         | -0.383006176 | 0.112317 | 0.147418 |
| AB57_1231 |      | hypothetical protein                                         | -0.362848044 | 0.016681 | 0.026009 |
| AB57_1232 |      | exodeoxyribonuclease X                                       | -0.830401578 | 4.98E-07 | 1.76E-06 |
| AB57_1233 |      | hypothetical protein                                         | -0.682479569 | 0.007773 | 0.013085 |
| AB57_1234 |      | hypothetical protein                                         | -0.8061936   | 0.000975 | 0.001942 |
| AB57_1235 |      | hypothetical protein                                         | 0.293929964  | 0.03785  | 0.054962 |
| AB57_1236 |      | hypothetical protein                                         | 0.20908283   | 0.341201 | 0.401668 |
| AB57_1237 |      | prophage LambdaSo, transcriptional regulator, Cro/CII family | 0.446777743  | 9.75E-05 | 0.000232 |
| AB57_1241 |      | hypothetical protein                                         | -0.436507278 | 0.12027  | 0.15669  |
| AB57_1242 |      | hypothetical protein                                         | -0.337048317 | 0.239617 | 0.294057 |
| AB57_1243 |      | hypothetical protein                                         | -0.478437221 | 0.034977 | 0.051112 |
| AB57_1244 |      | phosphoadenosine phosphosulfate reductase                    | -0.444549342 | 0.012521 | 0.020133 |
| AB57_1245 |      | hypothetical protein                                         | -0.65325248  | 0.001466 | 0.00282  |
| AB57_1246 |      | C-5 cytosine-specific DNA methylase                          | -0.416644471 | 0.001728 | 0.003301 |
| AB57_1247 |      | hypothetical protein                                         | -0.098554741 | 0.561965 | 0.617728 |
| AB57_1248 |      | phage replication protein, putative                          | -0.206946201 | 0.296296 | 0.354443 |
| AB57_1249 |      | hypothetical protein                                         | -0.511834262 | 0.06086  | 0.084879 |
| AB57_1250 |      | hypothetical protein                                         | -0.611849212 | 1.30E-05 | 3.61E-05 |
| AB57_1251 |      | hypothetical protein                                         | 0.408501225  | 0.063651 | 0.088371 |
| AB57_1252 |      | hypothetical protein                                         | 0.726940082  | 1.93E-06 | 6.23E-06 |
| AB57_1253 |      | hypothetical protein                                         | -0.640485212 | 2.30E-06 | 7.31E-06 |
| AB57_1254 |      | hypothetical protein                                         | -0.364194726 | 0.00062  | 0.001276 |
| AB57_1255 |      | hypothetical protein                                         | -0.806753367 | 1.05E-09 | 5.74E-09 |
| AB57_1256 |      | hypothetical protein                                         | -0.824196413 | 6.50E-09 | 3.06E-08 |
| AB57_1257 |      | hypothetical protein                                         | -0.01980504  | 0.871228 | 0.895009 |
| AB57_1258 |      | antirepressor protein                                        | -0.494226049 | 0.000216 | 0.000484 |
| AB57_1259 |      | hypothetical protein                                         | -0.820059504 | 9.40E-12 | 7.43E-11 |
| AB57_1260 |      | hypothetical protein                                         | -0.257032506 | 0.090542 | 0.121423 |
| AB57_1261 |      | hypothetical protein                                         | -0.734035158 | 0.001175 | 0.002305 |
| AB57_1262 |      | hypothetical protein                                         | -0.323651021 | 0.050703 | 0.071659 |
| AB57_1263 |      | hypothetical protein                                         | -0.409541322 | 0.03023  | 0.044956 |
| AB57_1266 |      | hypothetical protein                                         | -0.964674015 | 6.05E-05 | 0.000149 |
| AB57_1269 |      | hypothetical protein                                         | -0.531819167 | 0.041823 | 0.060188 |

|           |      |                                                  |              |          |          |
|-----------|------|--------------------------------------------------|--------------|----------|----------|
| AB57_1270 |      | phage terminase                                  | -0.682819993 | 2.00E-05 | 5.36E-05 |
| AB57_1271 |      | hypothetical protein                             | -0.699074578 | 1.45E-06 | 4.81E-06 |
| AB57_1272 |      | hypothetical protein                             | -1.085798959 | 6.11E-07 | 2.13E-06 |
| AB57_1273 |      | hypothetical protein                             | -0.640614174 | 0.008271 | 0.013816 |
| AB57_1274 |      | hypothetical protein                             | -0.353667131 | 0.109486 | 0.143958 |
| AB57_1275 |      | hypothetical protein                             | -0.580313084 | 6.34E-05 | 0.000155 |
| AB57_1276 |      | hypothetical protein                             | -0.377051428 | 0.045298 | 0.064512 |
| AB57_1277 |      | hypothetical protein                             | -0.086529855 | 0.708747 | 0.750319 |
| AB57_1278 |      | hypothetical protein                             | -0.632452329 | 0.00553  | 0.009579 |
| AB57_1280 |      | hypothetical protein                             | 0.645314367  | 0.00219  | 0.004083 |
| AB57_1282 |      | hypothetical protein                             | -0.008270808 | 0.966107 | 0.972679 |
| AB57_1283 |      | hypothetical protein                             | -0.626890817 | 0.000103 | 0.000243 |
| AB57_1284 |      | hypothetical protein                             | -0.708368936 | 0.000147 | 0.000339 |
| AB57_1285 |      | hypothetical protein                             | -0.566560363 | 0.037744 | 0.054852 |
| AB57_1286 |      | carbohydrate binding domain protein              | -0.598873423 | 5.43E-06 | 1.61E-05 |
| AB57_1287 |      | hypothetical protein                             | -0.518266559 | 0.013353 | 0.021304 |
| AB57_1288 |      | hypothetical protein                             | -0.913903789 | 4.47E-16 | 7.65E-15 |
| AB57_1289 |      | hypothetical protein                             | -0.571957118 | 0.018435 | 0.028528 |
| AB57_1290 |      | hypothetical protein                             | -0.799398465 | 1.11E-07 | 4.33E-07 |
| AB57_1291 |      | hypothetical protein                             | -0.79987345  | 0.000413 | 0.000879 |
| AB57_1292 |      | hypothetical protein                             | -0.512735009 | 0.003228 | 0.005846 |
| AB57_1293 |      | hypothetical protein                             | -0.40597009  | 0.011031 | 0.017908 |
| AB57_1294 |      | type III restriction enzyme, res subunit family  | -0.528870898 | 0.000297 | 0.000645 |
| AB57_1295 |      | hypothetical protein                             | -0.608102387 | 9.13E-05 | 0.000218 |
| AB57_1296 |      | hypothetical protein                             | -0.697313731 | 0.001143 | 0.002247 |
| AB57_1297 |      | hypothetical protein                             | -0.233816934 | 0.192301 | 0.240782 |
| AB57_1300 |      | hypothetical protein                             | -0.352846654 | 0.021623 | 0.033088 |
| AB57_1301 |      | hypothetical protein                             | -0.0392143   | 0.703625 | 0.745963 |
| AB57_1302 |      | hypothetical protein                             | 0.06122317   | 0.548414 | 0.605892 |
| AB57_1303 |      | paar motif family                                | -0.300334828 | 0.005949 | 0.010247 |
| AB57_1304 |      | hypothetical protein                             | 0.187996532  | 0.234284 | 0.288155 |
| AB57_1305 |      | DNA-directed DNA polymerase UmuC                 | -0.710178684 | 5.65E-05 | 0.00014  |
| AB57_1306 |      | DNA polymerase V component                       | -0.762280636 | 9.06E-06 | 2.58E-05 |
| AB57_1307 |      | hypothetical protein                             | -0.60750477  | 8.85E-05 | 0.000212 |
| AB57_1308 |      | hypothetical protein                             | 1.752423741  | 2.30E-21 | 9.80E-20 |
| AB57_1309 |      | hypothetical protein                             | 1.059794911  | 1.13E-09 | 6.14E-09 |
| AB57_1310 |      | phage integrase                                  | 1.175237344  | 9.89E-15 | 1.30E-13 |
| AB57_1311 | alaS | alanyl-tRNA synthetase                           | 1.461196298  | 2.15E-10 | 1.31E-09 |
| AB57_1312 |      | glyceraldehyde 3-phosphate dehydrogenase         | 0.378194488  | 0.000511 | 0.001069 |
| AB57_1314 |      | ATP phosphoribosyltransferase regulatory subunit | 1.312068507  | 4.85E-13 | 4.74E-12 |
| AB57_1315 | purA | adenylosuccinate synthetase                      | 1.910968148  | 3.90E-14 | 4.53E-13 |
| AB57_1316 |      | peptidase M48 family protein                     | 0.397256     | 0.003293 | 0.005947 |
| AB57_1317 |      | aldo/keto reductase                              | -0.22807397  | 0.02495  | 0.037665 |
| AB57_1318 |      | cAMP-regulatory protein                          | 0.535051686  | 1.67E-05 | 4.55E-05 |
| AB57_1319 |      | OsmC-like protein                                | 0.32456029   | 0.002458 | 0.00454  |
| AB57_1320 |      | peptidase M23/M37 family                         | -0.3570891   | 0.005111 | 0.00892  |
| AB57_1321 |      | acetyltransferase, GNAT family                   | -1.055414832 | 3.25E-12 | 2.80E-11 |
| AB57_1322 | clpB | ATP-dependent chaperone ClpB                     | -0.161583846 | 0.332061 | 0.39179  |
| AB57_1323 | cinA | competence/damage-inducible protein CinA         | -0.414841656 | 0.001088 | 0.002146 |
| AB57_1324 |      | hypothetical protein                             | -0.59083622  | 7.12E-07 | 2.46E-06 |
| AB57_1325 |      | 23S rRNA m(2)G2445 methyltransferase             | 1.538438403  | 3.34E-13 | 3.33E-12 |
| AB57_1326 |      | hypothetical protein                             | -0.739948837 | 0.000392 | 0.000836 |
| AB57_1327 | pyrB | aspartate carbamoyltransferase catalytic subunit | 1.900204985  | 2.15E-26 | 2.21E-24 |
| AB57_1328 |      | dihydroorotase                                   | 1.364016432  | 2.21E-13 | 2.27E-12 |
| AB57_1331 |      | hypothetical protein                             | -0.379419034 | 0.000356 | 0.000762 |
| AB57_1332 |      | glutathione S-transferase family protein         | -0.563922351 | 0.001413 | 0.002729 |
| AB57_1333 | trmB | tRNA (guanine-N(7))-methyltransferase            | 2.131992354  | 5.84E-23 | 3.05E-21 |
| AB57_1334 |      | endonuclease/exonuclease/phosphatase             | -0.196178871 | 0.100216 | 0.132832 |

|           |      |                                                              |              |          |          |
|-----------|------|--------------------------------------------------------------|--------------|----------|----------|
| AB57_1335 | gst  | glutathione S-transferase                                    | -1.015891027 | 5.25E-11 | 3.59E-10 |
| AB57_1336 |      | hypothetical protein                                         | -0.702951168 | 3.77E-07 | 1.35E-06 |
| AB57_1337 | ahpF | alkyl hydroperoxide reductase, F subunit                     | 0.3938609    | 0.000921 | 0.001846 |
| AB57_1338 |      | hypothetical protein                                         | -0.218453462 | 0.066671 | 0.092114 |
| AB57_1339 |      | O-methyl transferase                                         | -0.681029348 | 2.71E-08 | 1.16E-07 |
| AB57_1340 |      | hypothetical protein                                         | -1.407278938 | 9.97E-28 | 1.23E-25 |
| AB57_1341 | ahpC | peroxiredoxin                                                | 1.037417474  | 1.40E-09 | 7.49E-09 |
| AB57_1342 | hrpA | ATP-dependent helicase HrpA                                  | 0.305597285  | 0.03657  | 0.053314 |
| AB57_1343 |      | 3-oxoacyl-(acyl carrier protein) synthase III                | 0.531273036  | 4.90E-05 | 0.000123 |
| AB57_1344 |      | benzoate transport porin BenP                                | -1.556842632 | 1.49E-21 | 6.78E-20 |
| AB57_1345 |      | major facilitator superfamily MFS_1                          | -2.270430642 | 4.16E-29 | 6.70E-27 |
| AB57_1346 |      | benzoate transporter                                         | -0.068299836 | 0.559191 | 0.615775 |
| AB57_1347 |      | 1,6-dihydroxycyclohexa-2,4-diene-1-carboxylate dehydrogenase | -0.491966711 | 0.004518 | 0.007961 |
| AB57_1348 |      | benzoate 1,2-dioxygenase, electron transfer component        | -0.570866181 | 0.008993 | 0.014901 |
| AB57_1349 | benB | benzoate 1,2-dioxygenase, small subunit                      | -1.234787476 | 1.13E-05 | 3.16E-05 |
| AB57_1350 | benA | benzoate 1,2-dioxygenase, large subunit                      | -2.028178202 | 4.16E-12 | 3.51E-11 |
| AB57_1351 | benM | ben operon transcriptional regulator BenM                    | -0.66032561  | 6.91E-07 | 2.39E-06 |
| AB57_1352 |      | Heavy metal transport/detoxification protein                 | -0.855692631 | 1.33E-11 | 1.01E-10 |
| AB57_1353 |      | copper-translocating P-type ATPase                           | -0.720182968 | 1.15E-10 | 7.35E-10 |
| AB57_1354 | cueR | Cu(I)-responsive transcriptional regulator                   | -0.708813154 | 7.57E-10 | 4.26E-09 |
| AB57_1355 |      | hypothetical protein                                         | -0.399667222 | 0.003631 | 0.006509 |
| AB57_1356 |      | hypothetical protein                                         | -0.554706119 | 8.08E-06 | 2.33E-05 |
| AB57_1357 |      | hypothetical protein                                         | -1.274744598 | 3.22E-28 | 4.11E-26 |
| AB57_1358 |      | amino acid efflux pump, RhtB family                          | -0.114520163 | 0.51363  | 0.572418 |
| AB57_1359 |      | hypothetical protein                                         | -0.446776122 | 0.000141 | 0.000327 |
| AB57_1360 |      | hypothetical protein                                         | -0.216621986 | 0.171963 | 0.217377 |
| AB57_1361 |      | exodeoxyribonuclease VII large subunit                       | -0.658690287 | 1.94E-06 | 6.26E-06 |
| AB57_1362 |      | hypothetical protein                                         | -0.343040183 | 0.038606 | 0.05595  |
| AB57_1363 |      | peptidase S24 S26A and S26B                                  | -0.2204793   | 0.076486 | 0.104311 |
| AB57_1364 |      | hypothetical protein                                         | -0.002830381 | 0.984661 | 0.987062 |
| AB57_1365 |      | hypothetical protein                                         | 0.09017997   | 0.483654 | 0.543596 |
| AB57_1366 |      | transporter LysE family                                      | -0.319123364 | 0.0033   | 0.005953 |
| AB57_1367 |      | cold-shock DNA-binding domain protein                        | -0.708844405 | 3.03E-06 | 9.43E-06 |
| AB57_1368 |      | hypothetical protein                                         | -0.142665663 | 0.339782 | 0.400125 |
| AB57_1369 |      | pyrroline-5-carboxylate reductase                            | -0.208313988 | 0.085495 | 0.115197 |
| AB57_1370 |      | hypothetical protein                                         | -0.36358749  | 0.026254 | 0.03944  |
| AB57_1371 |      | hypothetical protein                                         | -1.045589014 | 2.57E-10 | 1.54E-09 |
| AB57_1372 |      | hypothetical protein                                         | -0.558333452 | 1.13E-05 | 3.16E-05 |
| AB57_1373 |      | transporter, major facilitator family                        | -0.321202742 | 0.044018 | 0.062932 |
| AB57_1374 |      | phage putative head morphogenesis protein                    | -0.496370587 | 0.000159 | 0.000363 |
| AB57_1375 |      | transcriptional regulator, MarR-family                       | 0.000208249  | 0.99924  | 0.99924  |
| AB57_1376 |      | hypothetical protein                                         | 0.575430796  | 2.21E-06 | 7.04E-06 |
| AB57_1377 |      | hypothetical protein                                         | -0.900700354 | 1.67E-09 | 8.79E-09 |
| AB57_1378 |      | 17 kDa surface antigen                                       | -0.955841428 | 1.91E-20 | 6.68E-19 |
| AB57_1379 |      | hypothetical protein                                         | -0.616937979 | 3.57E-06 | 1.10E-05 |
| AB57_1380 |      | hypothetical protein                                         | -0.607207438 | 1.65E-07 | 6.26E-07 |
| AB57_1381 |      | hypothetical protein                                         | -0.953072367 | 1.08E-09 | 5.92E-09 |
| AB57_1382 |      | hypothetical protein                                         | -0.818379293 | 4.86E-12 | 4.04E-11 |
| AB57_1383 |      | hypothetical protein                                         | -1.051649341 | 3.76E-16 | 6.70E-15 |
| AB57_1384 |      | hypothetical protein                                         | -0.453131666 | 2.48E-05 | 6.57E-05 |
| AB57_1385 |      | hypothetical protein                                         | -0.776553493 | 0.002261 | 0.004207 |
| AB57_1386 |      | hypothetical protein                                         | -0.178207287 | 0.443485 | 0.50458  |
| AB57_1387 |      | phage protein                                                | -0.49326515  | 0.12251  | 0.159439 |
| AB57_1388 |      | putative helicase                                            | 0.121567707  | 0.566958 | 0.622094 |
| AB57_1389 |      | phage-associated protein, family                             | -0.046092466 | 0.77685  | 0.811503 |
| AB57_1390 |      | putative bacteriophage protein                               | -0.497693344 | 0.028642 | 0.042749 |
| AB57_1391 |      | hypothetical protein                                         | 0.207045334  | 0.339426 | 0.39996  |
| AB57_1392 |      | hypothetical protein                                         | 0.135418418  | 0.283997 | 0.341608 |

|           |      |                                                               |              |          |          |
|-----------|------|---------------------------------------------------------------|--------------|----------|----------|
| AB57_1393 |      | putative phage-related protein                                | -0.025283655 | 0.885038 | 0.90635  |
| AB57_1394 |      | hypothetical protein                                          | -0.046094137 | 0.836718 | 0.864281 |
| AB57_1395 |      | hypothetical protein                                          | -0.218496101 | 0.306622 | 0.365497 |
| AB57_1396 |      | fibronectin type III domain protein                           | -0.532589324 | 4.80E-06 | 1.45E-05 |
| AB57_1397 |      | hypothetical protein                                          | -0.886833694 | 2.54E-11 | 1.84E-10 |
| AB57_1398 |      | hypothetical protein                                          | -1.24593086  | 2.30E-08 | 9.98E-08 |
| AB57_1399 |      | hypothetical protein                                          | -0.837437277 | 1.79E-13 | 1.85E-12 |
| AB57_1403 |      | lipoprotein, putative                                         | -0.721230202 | 9.03E-08 | 3.58E-07 |
| AB57_1404 |      | hypothetical protein                                          | -0.596269869 | 3.36E-07 | 1.21E-06 |
| AB57_1405 |      | lipoprotein, putative                                         | -0.723314404 | 4.35E-08 | 1.80E-07 |
| AB57_1408 | cysS | cysteinyl-tRNA synthetase                                     | 1.045972703  | 6.25E-10 | 3.56E-09 |
| AB57_1409 |      | arabinose 5-phosphate isomerase                               | 0.409077055  | 0.002602 | 0.004782 |
| AB57_1410 |      | 3-deoxy-D-manno-octulosonate 8-phosphate phosphatase          | 0.573296261  | 5.28E-06 | 1.58E-05 |
| AB57_1411 |      | hypothetical protein                                          | -0.049270573 | 0.642666 | 0.689236 |
| AB57_1412 | lptA | lipopolysaccharide transport periplasmic protein LptA         | 0.271629847  | 0.007635 | 0.012869 |
| AB57_1413 |      | ABC transporter, ATP-binding protein                          | 0.357491653  | 0.001592 | 0.00305  |
| AB57_1414 |      | putative RND family drug transporter                          | 0.300442162  | 0.004401 | 0.007776 |
| AB57_1415 |      | protein secretion ABC efflux system, permease and ATP-binding | 0.204330471  | 0.117638 | 0.153585 |
| AB57_1416 |      | membrane spanning export protein                              | 0.23977787   | 0.055396 | 0.077757 |
| AB57_1417 |      | thymidylate synthase                                          | -0.088806373 | 0.587521 | 0.640491 |
| AB57_1418 |      | acetyltransferase                                             | -0.291136703 | 0.08909  | 0.119606 |
| AB57_1419 |      | universal stress protein family                               | -1.055067603 | 1.05E-15 | 1.70E-14 |
| AB57_1420 |      | O-methyltransferase                                           | 0.386450271  | 0.000513 | 0.001071 |
| AB57_1421 |      | hypothetical protein                                          | 0.580261762  | 1.02E-05 | 2.88E-05 |
| AB57_1422 |      | ferredoxin-1                                                  | 1.849906323  | 2.88E-54 | 3.56E-51 |
| AB57_1423 |      | GCN5-related N-acetyltransferase                              | 0.54232265   | 6.86E-07 | 2.38E-06 |
| AB57_1424 | mutS | DNA mismatch repair protein MutS                              | 0.670161595  | 9.58E-06 | 2.72E-05 |
| AB57_1425 |      | hypothetical protein                                          | -0.372566704 | 0.007051 | 0.011967 |
| AB57_1426 |      | transcriptional regulator                                     | -0.150436636 | 0.443671 | 0.504637 |
| AB57_1427 |      | inner membrane transport protein YbiF                         | -0.558348797 | 2.01E-06 | 6.45E-06 |
| AB57_1428 |      | hypothetical protein                                          | -0.607476691 | 3.81E-07 | 1.37E-06 |
| AB57_1429 |      | diguanylate cyclase/phosphodiesterase                         | -0.560065907 | 0.00188  | 0.003571 |
| AB57_1430 |      | lipid A biosynthesis lauroyl acyltransferase                  | -0.063047142 | 0.623018 | 0.671669 |
| AB57_1431 |      | transcriptional regulator, TetR family                        | -0.111953047 | 0.624541 | 0.672918 |
| AB57_1432 | pcaK | 4-hydroxybenzoate transporter                                 | -1.705407491 | 1.01E-30 | 1.97E-28 |
| AB57_1433 |      | hypothetical protein                                          | -0.196898016 | 0.257072 | 0.313193 |
| AB57_1434 |      | hypothetical protein                                          | -0.21894404  | 0.051142 | 0.072223 |
| AB57_1436 |      | hypothetical protein                                          | -0.090998311 | 0.467805 | 0.528352 |
| AB57_1437 |      | 3-hydroxyacyl-CoA dehydrogenase                               | -1.040899165 | 3.71E-17 | 7.81E-16 |
| AB57_1438 |      | hypothetical protein                                          | -0.246075833 | 0.303183 | 0.36198  |
| AB57_1439 |      | hypothetical protein                                          | -0.083935641 | 0.464698 | 0.525323 |
| AB57_1440 |      | GCN5-related N-acetyltransferase                              | -0.453252609 | 0.084285 | 0.113732 |
| AB57_1441 |      | putative class A beta-lactamase                               | -0.360662327 | 0.010974 | 0.017824 |
| AB57_1442 |      | putative VGR-related protein                                  | 0.186301172  | 0.178649 | 0.225291 |
| AB57_1443 |      | RHS family protein                                            | 0.194298467  | 0.221833 | 0.273868 |
| AB57_1444 |      | hypothetical protein                                          | 0.674275297  | 3.19E-08 | 1.35E-07 |
| AB57_1445 |      | hypothetical protein                                          | -0.428954627 | 0.001044 | 0.002067 |
| AB57_1446 |      | hypothetical protein                                          | -0.422565348 | 0.000273 | 0.000601 |
| AB57_1447 |      | RHS family protein                                            | -0.014591503 | 0.92472  | 0.938158 |
| AB57_1448 |      | hypothetical protein                                          | -0.046025481 | 0.679837 | 0.722815 |
| AB57_1449 |      | hypothetical protein                                          | -0.266394994 | 0.009781 | 0.016077 |
| AB57_1450 |      | hypothetical protein                                          | -0.543274948 | 3.80E-06 | 1.16E-05 |
| AB57_1451 |      | transcriptional regulator, LysR-type                          | -0.208983964 | 0.093688 | 0.125143 |
| AB57_1452 |      | hypothetical protein                                          | -0.843724557 | 3.32E-05 | 8.64E-05 |
| AB57_1453 |      | LamB/YcsF family protein                                      | -0.285207061 | 0.056885 | 0.079634 |
| AB57_1454 |      | hypothetical protein                                          | 0.240330091  | 0.058603 | 0.081916 |
| AB57_1455 |      | allophanate hydrolase                                         | 0.654791268  | 7.94E-06 | 2.30E-05 |
| AB57_1456 |      | carbamoyl-phosphate synthase                                  | 1.223181779  | 1.75E-13 | 1.82E-12 |

|           |      |                                                            |              |          |          |
|-----------|------|------------------------------------------------------------|--------------|----------|----------|
| AB57_1457 |      | voltage-gated chloride channel                             | 0.877903157  | 2.92E-06 | 9.10E-06 |
| AB57_1458 |      | Sel1 repeat family                                         | -0.100197337 | 0.337768 | 0.398134 |
| AB57_1459 |      | hypothetical protein                                       | -0.317125601 | 0.005773 | 0.009968 |
| AB57_1460 |      | hypothetical protein                                       | -0.149075718 | 0.314784 | 0.373541 |
| AB57_1461 |      | transcriptional regulator, TetR family                     | -0.486247301 | 0.025381 | 0.038206 |
| AB57_1462 |      | hypothetical protein                                       | -0.916543481 | 5.86E-10 | 3.35E-09 |
| AB57_1463 |      | glutathione-dependent formaldehyde dehydrogenase           | -1.305545411 | 1.68E-26 | 1.83E-24 |
| AB57_1466 |      | urea amidolyase                                            | -0.288594573 | 0.033922 | 0.049727 |
| AB57_1467 |      | urea amidolyase                                            | -0.186541363 | 0.263073 | 0.319347 |
| AB57_1468 |      | NADPH oxidoreductase                                       | -0.682156295 | 0.001599 | 0.003061 |
| AB57_1469 |      | transcriptional regulator, DUF24 family                    | -0.370651792 | 0.016651 | 0.025984 |
| AB57_1471 |      | transcriptional regulator, CopG family                     | -0.16145904  | 0.534953 | 0.592612 |
| AB57_1472 |      | allophanate hydrolase                                      | -0.554131822 | 0.007652 | 0.012893 |
| AB57_1473 |      | ABC transport system substrate-binding protein             | -0.636690909 | 0.000138 | 0.00032  |
| AB57_1474 |      | nitrate transport ATP-binding protein NrtC                 | -0.361457753 | 0.020101 | 0.030907 |
| AB57_1475 |      | binding-protein-dependent transport systems inner membrane | 0.043320795  | 0.749288 | 0.786934 |
| AB57_1477 |      | hypothetical protein                                       | 0.378500407  | 0.000872 | 0.001754 |
| AB57_1478 |      | hypothetical protein                                       | -0.41383935  | 0.012735 | 0.020442 |
| AB57_1479 |      | type VI secretion protein, family                          | 1.430908043  | 1.92E-25 | 1.65E-23 |
| AB57_1480 |      | type VI secretion protein, EvpB/family                     | 1.191922354  | 5.13E-09 | 2.44E-08 |
| AB57_1481 |      | type VI secretion system effector, Hcp1 family             | 0.796721367  | 1.55E-06 | 5.11E-06 |
| AB57_1482 |      | type VI secretion system lysozyme-related protein          | 0.948822145  | 2.98E-18 | 7.56E-17 |
| AB57_1483 | vasA | type VI secretion protein, family                          | 0.339108435  | 0.002766 | 0.00506  |
| AB57_1484 |      | type VI secretion protein, family                          | -0.286881688 | 0.006384 | 0.010915 |
| AB57_1485 |      | hypothetical protein                                       | -0.695777134 | 4.19E-10 | 2.45E-09 |
| AB57_1486 | icmF | type VI secretion protein IcmF                             | 0.316561375  | 0.01533  | 0.024034 |
| AB57_1487 |      | type VI secretion-associated protein, family               | 0.393005828  | 0.000611 | 0.001262 |
| AB57_1488 |      | OmpA/MotB domain protein                                   | 0.315158034  | 0.006339 | 0.010849 |
| AB57_1489 |      | hypothetical protein                                       | -0.12307874  | 0.411571 | 0.472483 |
| AB57_1490 | clpV | type VI secretion ATPase, ClpV1 family                     | 0.45938664   | 0.000949 | 0.001897 |
| AB57_1491 |      | type VI secretion-associated protein, ImpA family          | 1.004990314  | 6.62E-15 | 9.11E-14 |
| AB57_1492 |      | type VI secretion protein, family                          | 0.948661025  | 2.65E-08 | 1.14E-07 |
| AB57_1493 |      | type IV / VI secretion system protein, DotU family         | 0.525834915  | 9.54E-05 | 0.000227 |
| AB57_1494 |      | hypothetical protein                                       | 0.728733391  | 8.00E-08 | 3.19E-07 |
| AB57_1495 |      | D-alanyl-D-alanine carboxypeptidase family                 | 0.531199125  | 1.72E-05 | 4.66E-05 |
| AB57_1496 |      | regulatory protein LysR:LysR, substrate-binding            | -0.425662095 | 0.001778 | 0.003392 |
| AB57_1497 |      | ankyrin repeat protein                                     | -0.394891881 | 0.032164 | 0.047413 |
| AB57_1498 |      | guanine deaminase                                          | -0.071381156 | 0.626403 | 0.674728 |
| AB57_1499 |      | cyanate transport protein CynX                             | -0.395365591 | 0.000383 | 0.000818 |
| AB57_1500 |      | hypothetical protein                                       | -0.198713604 | 0.064328 | 0.089119 |
| AB57_1501 |      | acetyltransferase, gnat family                             | -0.524299646 | 3.29E-06 | 1.02E-05 |
| AB57_1502 |      | hypothetical protein                                       | -0.639211177 | 5.52E-09 | 2.62E-08 |
| AB57_1503 | soxR | redox-sensitive transcriptional activator SoxR             | -0.150057603 | 0.492203 | 0.551529 |
| AB57_1504 |      | putative hemolysin                                         | -0.486744995 | 1.68E-05 | 4.56E-05 |
| AB57_1505 |      | dihydrodipicolinate synthetase                             | -0.156546428 | 0.290393 | 0.348359 |
| AB57_1506 |      | hypothetical protein                                       | -0.347071873 | 0.003695 | 0.006618 |
| AB57_1509 |      | proline racemase                                           | -0.096787597 | 0.528016 | 0.585943 |
| AB57_1510 |      | FAD dependent oxidoreductase                               | -0.129678439 | 0.487227 | 0.547113 |
| AB57_1512 |      | pyridine nucleotide-disulphide oxidoreductase              | -0.464690112 | 0.002597 | 0.004778 |
| AB57_1513 |      | transcriptional regulator, AraC family                     | -0.58497478  | 0.00967  | 0.015909 |
| AB57_1514 |      | shikimate transporter                                      | -0.77406287  | 1.99E-11 | 1.47E-10 |
| AB57_1515 |      | aldehyde dehydrogenase                                     | 0.133132181  | 0.231902 | 0.285346 |
| AB57_1516 |      | amino acid transporter                                     | -0.269901957 | 0.038625 | 0.055957 |
| AB57_1517 |      | L-serine dehydratase                                       | -0.21114275  | 0.042964 | 0.061567 |
| AB57_1518 | paaZ | bifunctional aldehyde dehydrogenase/enoyl-CoA hydratase    | 0.548116534  | 0.00332  | 0.005986 |
| AB57_1519 | paaA | phenylacetate-CoA oxygenase subunit PaaA                   | 0.318644501  | 0.092068 | 0.123246 |
| AB57_1520 | paaB | phenylacetate-CoA oxygenase subunit PaaB                   | 0.238650376  | 0.131161 | 0.169624 |
| AB57_1521 | paaC | phenylacetate-CoA oxygenase, Paal subunit                  | 0.232136183  | 0.180034 | 0.226805 |

|           |      |                                                                 |              |          |          |
|-----------|------|-----------------------------------------------------------------|--------------|----------|----------|
| AB57_1522 | paaD | phenylacetate-CoA oxygenase, PaaI subunit                       | 0.185356609  | 0.204515 | 0.254413 |
| AB57_1523 | paaE | phenylacetate-CoA oxygenase/reductase, PaaK subunit             | 0.178957167  | 0.251617 | 0.307255 |
| AB57_1524 | paaF | enoyl-coA hydratase                                             | 0.258020138  | 0.077086 | 0.105053 |
| AB57_1525 | paaG | phenylacetate degradation probable enoyl-CoA hydratase PaaB     | 0.51571397   | 0.001021 | 0.002026 |
| AB57_1526 | paaH | 3-hydroxyacyl-CoA dehydrogenase                                 | 0.652551243  | 0.000283 | 0.000619 |
| AB57_1527 | paaI | beta-ketoadipyl CoA thiolase                                    | 0.555218466  | 0.000717 | 0.001463 |
| AB57_1528 | paaK | phenylacetate-CoA ligase                                        | 0.086335426  | 0.608847 | 0.659466 |
| AB57_1529 | paaX | phenylacetic acid degradation operon negative regulatory prote  | 0.314907129  | 0.030889 | 0.045844 |
| AB57_1530 | paaY | phenylacetic acide degradation protein PaaY                     | 0.491573914  | 2.81E-05 | 7.39E-05 |
| AB57_1531 |      | thioesterase domain protein                                     | 1.303880804  | 3.90E-32 | 8.02E-30 |
| AB57_1532 |      | putative exonuclease                                            | -0.124794226 | 0.308352 | 0.367204 |
| AB57_1533 |      | UvrD/REP helicase                                               | -0.69786111  | 4.24E-10 | 2.46E-09 |
| AB57_1534 |      | transcriptional regulator, TetR family                          | -0.672962784 | 2.81E-06 | 8.78E-06 |
| AB57_1535 |      | hypothetical protein                                            | -0.863768611 | 4.19E-12 | 3.53E-11 |
| AB57_1536 |      | putative aminotransferase                                       | -0.927000161 | 3.09E-05 | 8.08E-05 |
| AB57_1538 |      | hypothetical protein                                            | -0.848301959 | 7.73E-06 | 2.24E-05 |
| AB57_1539 |      | cold-shock DNA-binding domain protein                           | -1.04768262  | 1.81E-14 | 2.22E-13 |
| AB57_1540 |      | hypothetical protein                                            | -2.380602589 | 3.97E-44 | 2.45E-41 |
| AB57_1541 |      | hypothetical protein                                            | -1.465905792 | 6.59E-15 | 9.11E-14 |
| AB57_1542 |      | hypothetical protein                                            | -1.329544715 | 1.06E-05 | 2.99E-05 |
| AB57_1543 |      | hypothetical protein                                            | -1.341371149 | 1.50E-14 | 1.88E-13 |
| AB57_1544 |      | transcriptional regulator, TetR family                          | -1.401334933 | 9.12E-15 | 1.21E-13 |
| AB57_1545 |      | transcriptional regulator, LysR family                          | -0.951073405 | 9.62E-09 | 4.41E-08 |
| AB57_1546 |      | L-carnitine dehydratase/bile acid-inducible protein F           | -0.088896206 | 0.527347 | 0.585414 |
| AB57_1547 |      | 3-hydroxy-3-methylglutaryl-CoA lyase                            | -0.511803859 | 1.06E-05 | 2.98E-05 |
| AB57_1548 |      | major facilitator superfamily MFS_1                             | -0.026452911 | 0.849529 | 0.876047 |
| AB57_1549 |      | catalase                                                        | -0.545196801 | 1.22E-05 | 3.41E-05 |
| AB57_1550 |      | cytochrome B561                                                 | -0.462594915 | 3.92E-05 | 0.0001   |
| AB57_1551 |      | hypothetical protein                                            | 0.39871949   | 0.001219 | 0.002382 |
| AB57_1552 |      | transcriptional regulator, GntR family                          | 0.483848988  | 4.75E-06 | 1.43E-05 |
| AB57_1553 |      | hypothetical protein                                            | 0.50993719   | 0.004695 | 0.008237 |
| AB57_1554 |      | hydrolase                                                       | 0.495008749  | 0.000223 | 0.000499 |
| AB57_1555 |      | flavoprotein oxidoreductase                                     | 0.536753013  | 0.000793 | 0.001609 |
| AB57_1556 |      | monooxygenase                                                   | 0.524289885  | 3.06E-05 | 8.01E-05 |
| AB57_1557 |      | aldehyde dehydrogenase                                          | 0.057793801  | 0.589436 | 0.642012 |
| AB57_1558 |      | hypothetical protein                                            | -0.206561136 | 0.446255 | 0.506797 |
| AB57_1559 |      | permease, cytosine/purines, uracil, thiamine, allantoin permeas | 0.129559271  | 0.277207 | 0.334202 |
| AB57_1560 |      | hypothetical protein                                            | 0.029668611  | 0.851863 | 0.87821  |
| AB57_1561 |      | succinate-semialdehyde dehydrogenase (NADP+)                    | -0.467484721 | 2.43E-05 | 6.46E-05 |
| AB57_1562 |      | 4-carboxymuconolactone decarboxylase                            | 0.023396159  | 0.864903 | 0.88967  |
| AB57_1563 |      | transcriptional regulator, LysR family                          | -0.595410048 | 0.001451 | 0.002793 |
| AB57_1564 |      | acyl carrier protein phosphodiesterase                          | -0.437056093 | 0.03362  | 0.049343 |
| AB57_1565 |      | P-hydroxybenzoate hydroxylase transcriptional activator         | 0.289048574  | 0.019618 | 0.030232 |
| AB57_1566 | pobA | 4-hydroxybenzoate 3-monooxygenase                               | 1.091941295  | 3.73E-06 | 1.14E-05 |
| AB57_1567 |      | transcriptional regulator, GntR family                          | -0.023236024 | 0.868998 | 0.893385 |
| AB57_1568 |      | 2-aminoethylphosphonate ABC transport system, 1-aminoethyl      | -0.260118071 | 0.218161 | 0.269604 |
| AB57_1569 |      | ABC transporter, ATP-binding protein                            | -0.434506296 | 0.112955 | 0.148098 |
| AB57_1570 |      | ABC transporter, permease                                       | -0.306533047 | 0.095633 | 0.127131 |
| AB57_1571 |      | FAD dependent oxidoreductase                                    | -0.655542031 | 0.00452  | 0.007961 |
| AB57_1572 | phnW | 2-aminoethylphosphonate--pyruvate transaminase                  | 0.483705804  | 0.000157 | 0.00036  |
| AB57_1573 | phnX | phosphonoacetaldehyde hydrolase                                 | 0.080945925  | 0.567283 | 0.622094 |
| AB57_1574 |      | cis-muconate transport protein                                  | 0.056756776  | 0.669026 | 0.713782 |
| AB57_1575 |      | acyl-CoA dehydrogenase                                          | 0.557650117  | 0.000243 | 0.000539 |
| AB57_1576 |      | L-carnitine dehydrogenase                                       | -0.501564852 | 0.000584 | 0.001207 |
| AB57_1577 |      | transcriptional regulator, IclR family                          | 0.390205445  | 0.000513 | 0.001072 |
| AB57_1578 |      | enoyl-CoA hydratase/isomerase                                   | -0.442432016 | 0.001435 | 0.002766 |
| AB57_1579 |      | 2-nitropropane dioxygenase                                      | -1.01784001  | 1.66E-09 | 8.74E-09 |
| AB57_1580 |      | major facilitator superfamily MFS_1                             | -0.311440408 | 0.015562 | 0.024367 |

|           |      |                                                          |              |          |          |
|-----------|------|----------------------------------------------------------|--------------|----------|----------|
| AB57_1581 |      | transcriptional regulator, IclR family                   | -0.212129629 | 0.078595 | 0.106873 |
| AB57_1582 |      | acetyl-CoA acetyltransferase                             | 0.176698895  | 0.138556 | 0.178148 |
| AB57_1583 |      | 3-hydroxy-acyl-CoA dehydrogenase                         | -0.168068903 | 0.139607 | 0.179232 |
| AB57_1584 |      | 3-ketoacyl-(acyl-carrier-protein) reductase              | -0.287362003 | 0.083553 | 0.112986 |
| AB57_1585 |      | enoyl-CoA hydratase                                      | 0.218264676  | 0.190918 | 0.239294 |
| AB57_1586 |      | acyl-CoA dehydrogenase                                   | -0.043394644 | 0.706911 | 0.748803 |
| AB57_1587 |      | MFS short chain dicarboxylate:H <sup>+</sup> symporter   | -0.241137944 | 0.017717 | 0.027509 |
| AB57_1588 |      | 3-oxoadipate CoA-transferase subunit A                   | -0.163782023 | 0.167822 | 0.212506 |
| AB57_1589 |      | 3-oxoadipate CoA-transferase subunit B                   | -0.026906806 | 0.82029  | 0.850757 |
| AB57_1590 |      | hypothetical protein                                     | 0.175145929  | 0.214921 | 0.265867 |
| AB57_1591 |      | major facilitator superfamily MFS_1                      | -0.302580152 | 0.007892 | 0.013255 |
| AB57_1592 |      | thioesterase superfamily protein                         | -0.257060204 | 0.056793 | 0.079567 |
| AB57_1593 |      | acyl-CoA dehydrogenase                                   | -0.183290393 | 0.208592 | 0.25899  |
| AB57_1594 |      | hypothetical protein                                     | -0.077274286 | 0.480073 | 0.540393 |
| AB57_1595 |      | indolepyruvate ferredoxin oxidoreductase                 | -0.915230748 | 9.37E-09 | 4.30E-08 |
| AB57_1596 |      | transcriptional regulator, LysR family                   | -0.366797748 | 0.004498 | 0.007933 |
| AB57_1597 |      | hydroxymethylglutaryl-CoA lyase                          | -0.773774297 | 8.22E-09 | 3.81E-08 |
| AB57_1598 |      | methylcrotonoyl-CoA carboxylase subunit alpha            | -0.293679681 | 0.100234 | 0.132832 |
| AB57_1599 |      | 3-methylglutaconyl-CoA hydratase                         | 0.338948833  | 0.058308 | 0.081535 |
| AB57_1600 |      | methylcrotonoyl-CoA carboxylase beta chain               | 0.793952739  | 3.37E-05 | 8.72E-05 |
| AB57_1601 |      | isovaleryl-CoA dehydrogenase                             | 1.246310293  | 9.11E-14 | 1.00E-12 |
| AB57_1602 |      | transcriptional regulator AcrR family                    | -0.272095657 | 0.15798  | 0.20073  |
| AB57_1603 |      | long-chain fatty-acid-CoA ligase                         | 0.136566001  | 0.375612 | 0.435937 |
| AB57_1604 |      | putative SAM-dependent methyltransferase                 | 0.118590652  | 0.351452 | 0.411249 |
| AB57_1605 |      | hypothetical protein                                     | 0.27744271   | 0.02873  | 0.042846 |
| AB57_1606 |      | lipolytic enzyme                                         | -0.416116145 | 0.00072  | 0.001468 |
| AB57_1608 |      | transcriptional regulator, LysR family                   | -0.433588587 | 0.006646 | 0.011326 |
| AB57_1610 |      | hypothetical protein                                     | -1.144410585 | 2.65E-10 | 1.59E-09 |
| AB57_1611 |      | hypothetical protein                                     | -0.917768582 | 4.89E-09 | 2.35E-08 |
| AB57_1612 |      | hypothetical protein                                     | -0.851299072 | 1.07E-14 | 1.38E-13 |
| AB57_1613 |      | surface antigen                                          | -0.957855507 | 4.63E-10 | 2.67E-09 |
| AB57_1614 |      | hypothetical protein                                     | -1.226571647 | 1.84E-16 | 3.41E-15 |
| AB57_1615 | cinA | competence/damage-inducible protein CinA                 | -1.008917589 | 1.05E-16 | 2.03E-15 |
| AB57_1616 |      | hypothetical protein                                     | -1.426914986 | 4.98E-13 | 4.85E-12 |
| AB57_1617 |      | catalase                                                 | -0.288877678 | 0.088907 | 0.119447 |
| AB57_1620 |      | hypothetical protein                                     | -0.674282358 | 0.000621 | 0.001278 |
| AB57_1621 |      | hypothetical protein                                     | -0.750785197 | 8.86E-06 | 2.54E-05 |
| AB57_1622 |      | hypothetical protein                                     | 0.157312764  | 0.610655 | 0.661037 |
| AB57_1623 |      | DNA polymerase V component                               | -0.363244278 | 0.037951 | 0.055088 |
| AB57_1624 |      | transporter, LysE family                                 | -0.460847416 | 0.000418 | 0.000887 |
| AB57_1625 |      | proline dehydrogenase transcriptional activator          | 0.007687032  | 0.972856 | 0.978409 |
| AB57_1626 |      | sensor histidine kinase/response regulator               | -0.719156355 | 8.24E-09 | 3.81E-08 |
| AB57_1629 |      | two component transcriptional regulator, LuxR family     | -0.253907534 | 0.135418 | 0.17452  |
| AB57_1630 |      | acetyltransferase, gnat family                           | -0.166996543 | 0.131579 | 0.170047 |
| AB57_1631 |      | ABC-type amino acid transport system                     | -1.146018613 | 0.00157  | 0.003008 |
| AB57_1632 |      | ArtM protein                                             | -1.440268857 | 0.0052   | 0.009054 |
| AB57_1633 |      | glutamate/aspartate ABC transporter, ATP-binding protein | -1.273490064 | 0.004782 | 0.008382 |
| AB57_1634 |      | ABC transporter, periplasmic binding protein             | -1.058920609 | 2.63E-11 | 1.90E-10 |
| AB57_1635 |      | ABC transporter, periplasmic binding protein             | -0.756228145 | 6.02E-11 | 4.05E-10 |
| AB57_1636 |      | transcriptional regulator, LysR family                   | -0.257914837 | 0.024295 | 0.036781 |
| AB57_1637 |      | lysine exporter protein                                  | -0.571757892 | 4.14E-05 | 0.000106 |
| AB57_1638 |      | cysteine desulfurase                                     | 0.078968309  | 0.529988 | 0.58764  |
| AB57_1639 |      | hypothetical protein                                     | -0.742001788 | 1.14E-09 | 6.18E-09 |
| AB57_1640 |      | serine acetyltransferase                                 | -1.609953079 | 0.000535 | 0.001113 |
| AB57_1641 |      | rhodanese domain protein                                 | -1.603371528 | 4.94E-05 | 0.000124 |
| AB57_1642 |      | 3-oxoacyl-[acyl-carrier-protein] reductase               | -0.541913165 | 0.00325  | 0.005877 |
| AB57_1643 |      | transcriptional regulator, LysR family                   | -0.49028826  | 0.001193 | 0.002335 |
| AB57_1644 |      | glutathione S-transferase family protein                 | -0.34921025  | 0.001214 | 0.002374 |

|           |      |                                                             |              |          |          |
|-----------|------|-------------------------------------------------------------|--------------|----------|----------|
| AB57_1645 |      | glutathione S-transferase family protein                    | -1.125393342 | 2.44E-16 | 4.43E-15 |
| AB57_1646 |      | transcriptional regulator, LysR family                      | -0.565947273 | 0.000253 | 0.000558 |
| AB57_1647 |      | LrgA family protein                                         | -0.311728901 | 0.239713 | 0.294077 |
| AB57_1648 |      | LrgB family protein                                         | -0.682479278 | 0.00049  | 0.001029 |
| AB57_1649 |      | transcriptional regulator, GntR family                      | -0.756712523 | 3.68E-05 | 9.48E-05 |
| AB57_1650 |      | negative transcriptional regulator                          | 0.051573081  | 0.751773 | 0.788424 |
| AB57_1651 |      | acetyltransferase                                           | 0.478135376  | 0.005191 | 0.009043 |
| AB57_1652 |      | MFS permease                                                | -0.352634996 | 0.007465 | 0.012589 |
| AB57_1654 | mdcA | malonate decarboxylase, alpha subunit                       | -0.584244673 | 0.000603 | 0.001246 |
| AB57_1655 | mdcB | triphosphoribosyl-dephospho-CoA synthase                    | -0.660986676 | 0.000557 | 0.001154 |
| AB57_1656 | mdcC | malonate decarboxylase subunit delta                        | -0.459256747 | 0.031572 | 0.046671 |
| AB57_1657 | mdcD | malonate decarboxylase subunit beta                         | -0.233220696 | 0.076867 | 0.104793 |
| AB57_1658 | mdcE | malonate decarboxylase, gamma subunit                       | -0.515795006 | 0.000334 | 0.00072  |
| AB57_1659 | mdcG | phosphoribosyl-dephospho-CoA transferase                    | -0.583711747 | 0.004167 | 0.007384 |
| AB57_1660 | mdcH | malonate decarboxylase, epsilon subunit                     | -0.474455528 | 0.012792 | 0.020516 |
| AB57_1661 | madL | malonate transporter, MadL subunit                          | 0.00818907   | 0.956973 | 0.966112 |
| AB57_1662 | madM | malonate transporter, MadM subunit                          | -0.052727459 | 0.630352 | 0.6776   |
| AB57_1663 | mdcR | malonate utilization transcriptional regulator, LysR family | -0.294534906 | 0.012298 | 0.019784 |
| AB57_1664 |      | aminotransferase                                            | 0.151396825  | 0.179508 | 0.226296 |
| AB57_1666 | cydB | cytochrome D ubiquinol oxidase, subunit II                  | 0.204250087  | 0.158507 | 0.201261 |
| AB57_1667 |      | cytochrome bd ubiquinol oxidase, subunit I                  | 0.07427579   | 0.563509 | 0.619057 |
| AB57_1669 |      | hypothetical protein                                        | -0.389944015 | 0.094639 | 0.126095 |
| AB57_1670 |      | acyl-CoA dehydrogenase family protein                       | -0.878715016 | 6.07E-05 | 0.000149 |
| AB57_1671 |      | monooxygenase, NtaA/SnaA/SoxA family                        | -1.649279408 | 2.09E-22 | 1.02E-20 |
| AB57_1672 |      | sugar transport protein                                     | -1.135328034 | 1.90E-11 | 1.42E-10 |
| AB57_1673 |      | hypothetical protein                                        | -0.321051104 | 0.009294 | 0.015331 |
| AB57_1674 | tauA | taurine ABC transporter, periplasmic binding protein        | -1.446303705 | 0.002891 | 0.005272 |
| AB57_1675 | tauB | taurine import ATP-binding protein                          | -1.469627237 | 0.003774 | 0.006746 |
| AB57_1676 | tauC | taurine transport system permease protein                   | -1.507820303 | 0.000123 | 0.000289 |
| AB57_1677 | tauD | taurine dioxygenase                                         | -1.673356802 | 1.75E-25 | 1.54E-23 |
| AB57_1678 |      | Asp/Glu racemase                                            | -0.989929095 | 8.99E-12 | 7.17E-11 |
| AB57_1679 |      | permease for cytosine/purines, uracil, thiamine, allantoin  | -0.694584684 | 7.39E-05 | 0.000179 |
| AB57_1680 |      | transcriptional regulator, GntR family                      | -0.035035662 | 0.771405 | 0.806271 |
| AB57_1681 |      | transcriptional regulator, LysR family                      | -0.408180135 | 0.002359 | 0.004373 |
| AB57_1682 |      | isochorismatase hydrolase                                   | -0.883198153 | 3.70E-08 | 1.55E-07 |
| AB57_1683 |      | amidohydrolase                                              | -0.428385182 | 0.000191 | 0.000433 |
| AB57_1687 | arsB | arsenical-resistance protein                                | -0.616446795 | 0.000827 | 0.001668 |
| AB57_1688 |      | transcriptional regulator, LysR family                      | -0.420014509 | 0.001452 | 0.002794 |
| AB57_1689 |      | chromate transporter                                        | -0.613992791 | 0.003461 | 0.006225 |
| AB57_1690 |      | chromate transporter                                        | -0.836183636 | 3.82E-05 | 9.80E-05 |
| AB57_1691 |      | FAD-dependent pyridine nucleotide-disulphide oxidoreductase | 0.566032061  | 5.63E-05 | 0.00014  |
| AB57_1692 |      | hypothetical protein                                        | -0.260801053 | 0.014931 | 0.023509 |
| AB57_1693 |      | hypothetical protein                                        | 1.094505627  | 1.47E-11 | 1.11E-10 |
| AB57_1694 |      | serine acetyltransferase                                    | 0.413577859  | 0.000607 | 0.001253 |
| AB57_1695 |      | RNA methyltransferase, TrmH family, group 1                 | 0.668663854  | 1.87E-08 | 8.20E-08 |
| AB57_1696 |      | DNA polymerase III subunit alpha                            | 0.166421332  | 0.216585 | 0.267836 |
| AB57_1697 |      | L-asparaginase 2                                            | -0.297965924 | 0.052914 | 0.074526 |
| AB57_1698 |      | proton/sodium-glutamate symport protein                     | -0.267755615 | 0.085592 | 0.115286 |
| AB57_1699 |      | aminotransferase AlaT                                       | -0.071725651 | 0.611675 | 0.661754 |
| AB57_1700 | msrB | methionine-R-sulfoxide reductase                            | -1.08258309  | 1.55E-17 | 3.47E-16 |
| AB57_1701 |      | glutathione peroxidase                                      | -0.431723201 | 0.000105 | 0.000248 |
| AB57_1702 |      | transcriptional regulator, AraC family                      | -0.41397799  | 0.002156 | 0.004031 |
| AB57_1703 |      | lysine exporter protein                                     | -0.371911197 | 0.013515 | 0.021545 |
| AB57_1704 |      | succinyldiaminopimelate transaminase                        | 1.183816778  | 1.71E-09 | 9.00E-09 |
| AB57_1705 | glnD | [protein-PII] uridylyltransferase                           | 0.249223129  | 0.066945 | 0.092459 |
| AB57_1706 | purT | phosphoribosylglycinamide formyltransferase 2               | 0.295366543  | 0.01117  | 0.018096 |
| AB57_1707 |      | hypothetical protein                                        | -0.308582255 | 0.014909 | 0.023484 |
| AB57_1708 |      | hypothetical protein                                        | -0.612888187 | 7.66E-06 | 2.23E-05 |



|           |      |                                                                |              |          |          |
|-----------|------|----------------------------------------------------------------|--------------|----------|----------|
| AB57_1709 |      | putative amino acid transporter                                | -0.438195569 | 0.000105 | 0.000249 |
| AB57_1710 |      | hypothetical protein                                           | 1.2505913    | 7.00E-25 | 5.28E-23 |
| AB57_1711 |      | hypothetical protein                                           | -0.901361087 | 8.64E-11 | 5.65E-10 |
| AB57_1712 |      | transcriptional regulator, Crp/Fnr family                      | -0.321409363 | 0.017178 | 0.026717 |
| AB57_1713 |      | hypothetical protein                                           | -0.646835477 | 4.14E-05 | 0.000106 |
| AB57_1714 | ychF | GTP-dependent nucleic acid-binding protein EngD                | 2.407378071  | 1.58E-21 | 7.13E-20 |
| AB57_1715 |      | D-methionine transport system permease protein MetI            | 0.339020826  | 0.030305 | 0.045032 |
| AB57_1716 |      | D-and L-methionine transport protein                           | 1.118929461  | 3.35E-15 | 4.86E-14 |
| AB57_1717 |      | D-methionine transport protein                                 | 1.536689293  | 8.07E-27 | 9.33E-25 |
| AB57_1718 |      | D-methionine transport protein                                 | 0.934824056  | 1.13E-12 | 1.06E-11 |
| AB57_1719 |      | hypothetical protein                                           | -0.929750229 | 4.16E-13 | 4.11E-12 |
| AB57_1722 |      | putative Acyl-CoA dehydrogenase                                | -0.871733053 | 0.021176 | 0.032444 |
| AB57_1723 |      | acyl-CoA dehydrogenase family protein                          | -1.186867422 | 0.001545 | 0.002963 |
| AB57_1724 |      | glutathione S-transferase                                      | -0.734093282 | 3.52E-09 | 1.75E-08 |
| AB57_1725 | gltI | glutamate/aspartate ABC transporter, periplasmic glutamate/as  | -1.302788119 | 4.32E-14 | 4.96E-13 |
| AB57_1726 | gltJ | glutamate/aspartate transport system permease protein GltJ     | -0.144835296 | 0.213093 | 0.264224 |
| AB57_1727 | gltK | glutamate/aspartate transport system permease protein GltK     | 0.244279185  | 0.085154 | 0.114822 |
| AB57_1728 | gltL | glutamate/aspartate transport ATP-binding protein GltL         | 0.082438557  | 0.584435 | 0.637314 |
| AB57_1729 |      | hypothetical protein                                           | -0.448411076 | 0.017825 | 0.027641 |
| AB57_1730 |      | transcriptional regulator, AsnC family                         | -0.29282045  | 0.004202 | 0.007443 |
| AB57_1731 |      | hypothetical protein                                           | 0.768890265  | 8.47E-10 | 4.71E-09 |
| AB57_1732 |      | 1-acyl-sn-glycerol-3-phosphate acyltransferase                 | 0.57814749   | 9.78E-06 | 2.77E-05 |
| AB57_1733 |      | transcriptional regulator, TetR family                         | -0.432386752 | 0.000455 | 0.000959 |
| AB57_1734 |      | hypothetical protein                                           | -1.261490992 | 2.44E-16 | 4.43E-15 |
| AB57_1735 |      | phage integrase                                                | -0.55891964  | 6.85E-07 | 2.38E-06 |
| AB57_1736 |      | hypothetical protein                                           | -0.635037834 | 0.006326 | 0.010831 |
| AB57_1737 |      | transcriptional Regulator, LysR family                         | -0.501374357 | 1.76E-05 | 4.75E-05 |
| AB57_1738 |      | hypothetical protein                                           | -0.314319191 | 0.014617 | 0.023072 |
| AB57_1739 |      | cytosine/purines/uracil/thiamine/allantoin permease family pro | 0.134726028  | 0.266878 | 0.323436 |
| AB57_1740 |      | hypothetical protein                                           | -1.383103362 | 4.82E-16 | 8.21E-15 |
| AB57_1741 |      | hypothetical protein                                           | -1.206686603 | 2.75E-12 | 2.42E-11 |
| AB57_1742 |      | transcriptional regulator, LysR family                         | -0.450630147 | 0.000808 | 0.001636 |
| AB57_1743 |      | hypothetical protein                                           | -0.27824275  | 0.164803 | 0.208897 |
| AB57_1744 |      | fimbrial protein                                               | -0.295898777 | 0.076298 | 0.104132 |
| AB57_1745 |      | fimbrial biogenesis outer membrane usher protein               | -0.274449337 | 0.087989 | 0.118299 |
| AB57_1746 |      | pili assembly chaperone                                        | -0.458145045 | 0.008715 | 0.014505 |
| AB57_1747 |      | fimbrial protein                                               | 0.192013375  | 0.139794 | 0.179409 |
| AB57_1748 |      | hypothetical protein                                           | -0.277740188 | 0.299653 | 0.358113 |
| AB57_1749 |      | hypothetical protein                                           | 0.416446126  | 0.009245 | 0.01527  |
| AB57_1750 | bioB | biotin synthase                                                | 0.808371519  | 4.78E-09 | 2.31E-08 |
| AB57_1751 |      | iron-sulfur cluster binding protein                            | 0.162801581  | 0.166075 | 0.210438 |
| AB57_1752 |      | carbohydrate kinase family                                     | -0.728143919 | 1.53E-09 | 8.16E-09 |
| AB57_1753 | ruvC | Holliday junction resolvase                                    | -0.215749008 | 0.083831 | 0.113203 |
| AB57_1755 |      | transcriptional regulator, XRE family                          | 0.011214505  | 0.943006 | 0.954355 |
| AB57_1756 | yncA | phosphinothricin acetyltransferase                             | -0.07960927  | 0.548718 | 0.606047 |
| AB57_1757 |      | carbapenem-hydrolyzing oxacillinase OXA-69                     | -0.598598121 | 0.002921 | 0.005319 |
| AB57_1758 | fxsA | suppressor of F exclusion of phage T7                          | -0.539695501 | 5.84E-05 | 0.000144 |
| AB57_1759 |      | hypothetical protein                                           | -0.556890849 | 7.43E-06 | 2.17E-05 |
| AB57_1760 |      | hypothetical protein                                           | -0.802274329 | 5.44E-05 | 0.000135 |
| AB57_1761 | metK | S-adenosylmethionine synthetase                                | 1.220967364  | 1.57E-14 | 1.96E-13 |
| AB57_1762 | tkt  | transketolase                                                  | 1.577505077  | 1.89E-11 | 1.41E-10 |
| AB57_1763 |      | OsmC family protein                                            | -0.420680512 | 9.38E-05 | 0.000224 |
| AB57_1764 |      | hypothetical protein                                           | 0.093282716  | 0.473365 | 0.533979 |
| AB57_1765 |      | hypothetical protein                                           | -0.736510246 | 5.64E-11 | 3.84E-10 |
| AB57_1766 |      | hypothetical protein                                           | -0.819060724 | 2.28E-11 | 1.66E-10 |
| AB57_1767 |      | hypothetical protein                                           | -0.808242408 | 3.82E-10 | 2.24E-09 |
| AB57_1768 | trmA | tRNA (uracil-5-)-methyltransferase                             | 1.329476994  | 1.47E-13 | 1.54E-12 |
| AB57_1769 |      | hypothetical protein                                           | -0.257171102 | 0.105393 | 0.13922  |

|           |      |                                                                |              |          |          |
|-----------|------|----------------------------------------------------------------|--------------|----------|----------|
| AB57_1770 |      | bifunctional proline dehydrogenase/pyrroline-5-carboxylate def | 3.510271945  | 2.99E-25 | 2.41E-23 |
| AB57_1771 |      | leucine-responsive regulatory protein                          | -0.351277172 | 0.006723 | 0.011432 |
| AB57_1772 | putP | sodium/proline symporter                                       | 1.695307841  | 3.50E-15 | 5.06E-14 |
| AB57_1773 |      | NAD-dependent deacetylase regulatory protein                   | -0.153154879 | 0.271784 | 0.328628 |
| AB57_1774 | gcvH | glycine cleavage system protein H                              | 1.236318337  | 1.81E-18 | 4.79E-17 |
| AB57_1775 |      | transcriptional regulator, AraC family                         | 0.006251726  | 0.957389 | 0.966268 |
| AB57_1776 |      | MaoC domain protein dehydratase                                | -0.021153699 | 0.886341 | 0.907365 |
| AB57_1779 |      | nucleoprotein/polynucleotide-associated enzyme                 | 0.967576577  | 6.65E-14 | 7.37E-13 |
| AB57_1780 |      | permease                                                       | 1.038038579  | 3.82E-11 | 2.69E-10 |
| AB57_1781 |      | serine/threonine transporter SstT                              | 1.509621801  | 6.43E-15 | 8.95E-14 |
| AB57_1782 |      | transcriptional regulator, ArsR family                         | -0.62495168  | 6.46E-09 | 3.05E-08 |
| AB57_1783 |      | transcriptional regulator, TetR family                         | 0.388388744  | 0.001086 | 0.002144 |
| AB57_1784 |      | cupin family protein                                           | 1.459267989  | 6.50E-21 | 2.51E-19 |
| AB57_1785 | maf  | septum formation protein Maf                                   | 0.217149053  | 0.039347 | 0.056913 |
| AB57_1786 |      | hypothetical protein                                           | -0.594051434 | 9.08E-08 | 3.60E-07 |
| AB57_1787 | pgk  | phosphoglycerate kinase                                        | 1.913388781  | 9.03E-12 | 7.19E-11 |
| AB57_1788 |      | hypothetical protein                                           | 1.113488849  | 7.04E-08 | 2.84E-07 |
| AB57_1789 | fbp  | fructose-1,6-bisphosphate aldolase                             | 1.50702831   | 3.93E-15 | 5.64E-14 |
| AB57_1790 |      | PpiC-type peptidyl-prolyl cis-trans isomerase                  | 0.563023697  | 0.000141 | 0.000327 |
| AB57_1791 |      | organic solvent tolerance protein                              | 0.43083674   | 0.002533 | 0.004669 |
| AB57_1792 |      | aminoglycoside phosphotransferase                              | 0.96051272   | 6.81E-16 | 1.14E-14 |
| AB57_1793 |      | nucleotidyl transferase family protein                         | 0.733760045  | 5.48E-08 | 2.24E-07 |
| AB57_1794 | gidB | 16S rRNA methyltransferase GidB                                | 0.643281463  | 4.44E-09 | 2.17E-08 |
| AB57_1795 |      | sporulation initiation inhibitor protein soj                   | 0.789051104  | 1.32E-15 | 2.08E-14 |
| AB57_1796 |      | chromosome partitioning protein ParB                           | 0.543034942  | 5.42E-06 | 1.61E-05 |
| AB57_1797 |      | MotA/TolQ/ExbB proton channel                                  | -0.685052779 | 2.14E-08 | 9.37E-08 |
| AB57_1798 |      | biopolymer transport protein ExbD/TolR                         | -0.158493249 | 0.200019 | 0.249518 |
| AB57_1799 | msbA | lipid A export permease/ATP-binding protein MsbA               | 0.485603662  | 0.003906 | 0.006954 |
| AB57_1800 | lpxK | tetraacyldisaccharide 4'-kinase                                | 0.278144602  | 0.014268 | 0.022581 |
| AB57_1801 |      | 3-deoxy-manno-octulosonate cytidyltransferase                  | 0.733825481  | 7.52E-08 | 3.03E-07 |
| AB57_1802 |      | 3-deoxy-manno-octulosonate cytidyltransferase                  | 0.649928418  | 1.19E-07 | 4.62E-07 |
| AB57_1803 |      | DNA polymerase III delta prime subunit                         | 0.43341939   | 9.06E-05 | 0.000217 |
| AB57_1804 |      | type 4 fimbrial biogenesis protein                             | 0.214975184  | 0.065972 | 0.091217 |
| AB57_1805 |      | TatD-related deoxyribonuclease                                 | 0.419491768  | 0.000174 | 0.000395 |
| AB57_1806 |      | transcriptional regulator, TetR family                         | 0.38589945   | 0.000321 | 0.000694 |
| AB57_1807 | gspG | general secretion pathway protein G                            | 0.091926581  | 0.403964 | 0.464905 |
| AB57_1808 | gspI | general secretion pathway protein I                            | -0.402157589 | 0.034236 | 0.050148 |
| AB57_1809 | gspJ | general secretion pathway protein J                            | -0.338773868 | 0.022391 | 0.034149 |
| AB57_1810 | gspK | general secretion pathway protein K                            | -0.13024088  | 0.325923 | 0.385646 |
| AB57_1811 |      | putative 6-pyruvoyl tetrahydrobiopterin synthase               | -0.220258595 | 0.105019 | 0.13884  |
| AB57_1812 | ung  | uracil-DNA glycosylase                                         | 0.568575386  | 5.35E-08 | 2.19E-07 |
| AB57_1813 |      | putative enoyl-CoA hydratase/isomerase                         | 1.017122372  | 5.43E-10 | 3.11E-09 |
| AB57_1814 |      | tRNA-specific adenosine deaminase                              | 0.37197721   | 0.000557 | 0.001154 |
| AB57_1815 |      | hypothetical protein                                           | 0.836798979  | 1.41E-12 | 1.29E-11 |
| AB57_1816 | cmk  | cytidylate kinase                                              | 0.666655497  | 0.000238 | 0.000529 |
| AB57_1817 | rpsA | 30S ribosomal protein S1                                       | 1.02894102   | 4.52E-09 | 2.20E-08 |
| AB57_1818 | ihfB | integration host factor, beta subunit                          | -0.011154454 | 0.928835 | 0.941817 |
| AB57_1819 |      | hypothetical protein                                           | -0.317920997 | 0.016035 | 0.025075 |
| AB57_1820 |      | hypothetical protein                                           | 0.059106217  | 0.589177 | 0.641918 |
| AB57_1821 | pyrF | orotidine 5'-phosphate decarboxylase                           | 1.825960422  | 5.47E-29 | 8.43E-27 |
| AB57_1822 |      | monooxygenase, flavin-binding family                           | -0.347203582 | 0.015293 | 0.023987 |
| AB57_1823 |      | transcriptional regulator, AraC family                         | -0.40568926  | 0.008745 | 0.014549 |
| AB57_1824 |      | AFG1-family ATPase                                             | 0.756022699  | 2.42E-06 | 7.67E-06 |
| AB57_1825 | glcB | malate synthase G                                              | 0.828581021  | 9.65E-07 | 3.28E-06 |
| AB57_1826 |      | acetyltransferase, gnat family                                 | 0.388112556  | 0.17295  | 0.218476 |
| AB57_1827 |      | biopolymer transport protein ExbD/TolR                         | -0.788080285 | 1.92E-09 | 1.00E-08 |
| AB57_1828 |      | biopolymer transport protein ExbD/TolR                         | -0.393769861 | 0.047348 | 0.067199 |
| AB57_1829 |      | biopolymer transport protein                                   | 0.031979521  | 0.786761 | 0.820929 |

|           |      |                                                                  |              |          |          |
|-----------|------|------------------------------------------------------------------|--------------|----------|----------|
| AB57_1830 |      | TonB family protein                                              | -0.701205612 | 1.71E-06 | 5.58E-06 |
| AB57_1831 |      | TonB-dependent receptor                                          | -1.206139072 | 4.81E-17 | 9.87E-16 |
| AB57_1832 |      | heme-binding protein A                                           | 0.109915814  | 0.346945 | 0.407135 |
| AB57_1833 |      | heme-binding protein A                                           | 0.260523761  | 0.06803  | 0.093782 |
| AB57_1834 |      | Zn-dependent oligopeptidase                                      | 0.330577742  | 0.019698 | 0.030342 |
| AB57_1835 |      | ABC-type dipeptide/oligopeptide/nickel transport system permease | 0.112241577  | 0.415401 | 0.476436 |
| AB57_1836 |      | ABC-type dipeptide/oligopeptide/nickel transport system permease | -0.18431661  | 0.129046 | 0.16724  |
| AB57_1837 |      | glutathione import ATP-binding protein GsiA                      | 0.188553038  | 0.070781 | 0.09714  |
| AB57_1838 |      | hypothetical protein                                             | -0.355382788 | 0.001312 | 0.002549 |
| AB57_1839 |      | hypothetical protein                                             | -0.764908796 | 2.86E-08 | 1.22E-07 |
| AB57_1840 |      | 3'(2'),5'-bisphosphate nucleotidase                              | 0.110855963  | 0.313912 | 0.372626 |
| AB57_1841 |      | phosphoglycerate mutase                                          | -0.266123129 | 0.025362 | 0.038192 |
| AB57_1842 | rpsT | 30S ribosomal protein S20                                        | 0.514790569  | 0.036597 | 0.053331 |
| AB57_1843 |      | nucleoside-diphosphate-sugar epimerase                           | -0.558129254 | 0.000812 | 0.001642 |
| AB57_1844 |      | ribonuclease activity regulator protein RraA                     | -0.322490349 | 0.007205 | 0.012201 |
| AB57_1845 |      | glutaredoxin                                                     | -0.457770485 | 0.000254 | 0.00056  |
| AB57_1846 |      | Dyp-type peroxidase                                              | 0.056631977  | 0.569566 | 0.624413 |
| AB57_1847 |      | hypothetical protein                                             | -0.615400057 | 1.61E-08 | 7.13E-08 |
| AB57_1848 | mfd  | transcription-repair coupling factor                             | -0.09921584  | 0.407336 | 0.468202 |
| AB57_1849 |      | histidine triad protein                                          | -0.120107752 | 0.367523 | 0.427487 |
| AB57_1850 |      | adenylate/guanylate cyclase                                      | -0.27228813  | 0.043272 | 0.06196  |
| AB57_1851 | fdx  | ferredoxin, 2Fe-2S type                                          | 1.039120262  | 1.09E-15 | 1.75E-14 |
| AB57_1852 | hscA | chaperone protein HscA                                           | 0.893789006  | 1.43E-06 | 4.74E-06 |
| AB57_1853 | hscB | Fe-S protein assembly co-chaperone HscB                          | 0.164786599  | 0.191704 | 0.240198 |
| AB57_1854 | iscA | iron-sulfur cluster assembly protein IscA                        | 0.006334964  | 0.965656 | 0.972673 |
| AB57_1855 | iscU | scaffold protein                                                 | -0.203758952 | 0.187338 | 0.235205 |
| AB57_1856 | iscS | cysteine desulfurase IscS                                        | 0.799697477  | 2.75E-05 | 7.24E-05 |
| AB57_1857 |      | iscRSUA operon repressor                                         | 0.695568516  | 7.15E-10 | 4.03E-09 |
| AB57_1858 |      | hypothetical protein                                             | -0.17933817  | 0.319334 | 0.378297 |
| AB57_1859 |      | hypothetical protein                                             | -0.364280598 | 0.000391 | 0.000834 |
| AB57_1860 | hup  | DNA-binding protein HU                                           | -0.498988076 | 0.000462 | 0.000972 |
| AB57_1861 |      | peptidyl-prolyl cis-trans isomerase                              | 1.088381298  | 4.97E-09 | 2.38E-08 |
| AB57_1862 |      | transcriptional regulator, AraC family                           | -0.593303519 | 2.13E-06 | 6.81E-06 |
| AB57_1863 |      | alkane 1-monooxygenase                                           | -0.376659475 | 0.000446 | 0.000944 |
| AB57_1864 |      | acyl-CoA dehydrogenase, middle domain protein                    | -0.402969077 | 0.000166 | 0.000377 |
| AB57_1865 |      | acyl-CoA dehydrogenase                                           | -0.679975956 | 8.00E-11 | 5.26E-10 |
| AB57_1866 |      | ABC-1 domain protein                                             | -0.078525049 | 0.570563 | 0.625136 |
| AB57_1867 |      | hypothetical protein                                             | -1.022638782 | 1.33E-14 | 1.69E-13 |
| AB57_1868 |      | hypothetical protein                                             | 0.208815213  | 0.135276 | 0.174397 |
| AB57_1869 |      | hypothetical protein                                             | -0.46587402  | 0.000204 | 0.000459 |
| AB57_1870 |      | hypothetical protein                                             | -0.611057853 | 1.53E-06 | 5.05E-06 |
| AB57_1871 |      | transporter, major facilitator family                            | -0.670307829 | 9.88E-08 | 3.89E-07 |
| AB57_1872 |      | siderophore biosynthesis protein                                 | -0.479407881 | 1.44E-06 | 4.77E-06 |
| AB57_1873 |      | siderophore biosynthesis protein                                 | 0.091491562  | 0.446838 | 0.507303 |
| AB57_1874 |      | hypothetical protein                                             | -0.157293316 | 0.329417 | 0.389283 |
| AB57_1875 |      | dimethylmenaquinone methyltransferase                            | -0.237819421 | 0.086561 | 0.116464 |
| AB57_1876 |      | TonB-dependent receptor                                          | 1.607211543  | 9.76E-11 | 6.33E-10 |
| AB57_1877 |      | hypothetical protein                                             | 0.038979932  | 0.825798 | 0.85539  |
| AB57_1878 |      | hypothetical protein                                             | -0.24650748  | 0.02641  | 0.039657 |
| AB57_1879 |      | hypothetical protein                                             | -0.021927412 | 0.910264 | 0.927306 |
| AB57_1880 |      | rhizobactin siderophore biosynthesis protein RhbD                | 0.15056112   | 0.288341 | 0.346159 |
| AB57_1882 |      | HAD-superfamily hydrolase                                        | -0.039421249 | 0.756912 | 0.793139 |
| AB57_1883 |      | hypothetical protein                                             | 0.013818428  | 0.92252  | 0.936183 |
| AB57_1884 |      | bifunctional adenosylcobalamin biosynthesis protein CobP         | 0.165934188  | 0.188222 | 0.236236 |
| AB57_1885 | cobT | nicotinate-nucleotide--dimethylbenzimidazole phosphoribosyltr    | 0.666193533  | 1.36E-09 | 7.26E-09 |
| AB57_1886 |      | fructose-2,6-bisphosphatase                                      | 0.186986159  | 0.14672  | 0.187453 |
| AB57_1887 |      | histidine acid phosphatase family protein                        | -0.18895244  | 0.213265 | 0.264273 |
| AB57_1888 | cobS | cobalamin 5'-phosphate synthase                                  | -0.591225445 | 2.17E-07 | 8.07E-07 |

|           |      |                                                                 |              |          |          |
|-----------|------|-----------------------------------------------------------------|--------------|----------|----------|
| AB57_1889 |      | phospho-2-dehydro-3-deoxyheptonate aldolase                     | 0.874058489  | 1.95E-09 | 1.02E-08 |
| AB57_1890 |      | hypothetical protein                                            | -0.373672022 | 0.170853 | 0.216122 |
| AB57_1891 |      | hypothetical protein                                            | -0.33595539  | 0.00662  | 0.011288 |
| AB57_1893 |      | outer-membrane receptor for Fe(III)-coprogen,Fe(III)-ferrioxami | -0.137067632 | 0.253641 | 0.309421 |
| AB57_1894 | lpxB | lipid-A-disaccharide synthase                                   | 0.04801504   | 0.649379 | 0.695025 |
| AB57_1895 |      | hypothetical protein                                            | 0.836635203  | 6.77E-09 | 3.18E-08 |
| AB57_1896 |      | hypothetical protein                                            | -0.239054898 | 0.033604 | 0.049339 |
| AB57_1897 |      | hypothetical protein                                            | -0.989353311 | 3.61E-08 | 1.51E-07 |
| AB57_1898 |      | putative porin                                                  | 0.510374259  | 1.06E-06 | 3.57E-06 |
| AB57_1899 |      | histidine triad protein                                         | 0.284073523  | 0.042821 | 0.061409 |
| AB57_1900 |      | hypothetical protein                                            | -0.179174174 | 0.112548 | 0.147669 |
| AB57_1901 |      | hypothetical protein                                            | -0.653250341 | 2.88E-05 | 7.55E-05 |
| AB57_1902 |      | hypothetical protein                                            | -0.835361306 | 9.13E-12 | 7.23E-11 |
| AB57_1903 |      | hypothetical protein                                            | 0.751616048  | 5.01E-09 | 2.40E-08 |
| AB57_1904 |      | hypothetical protein                                            | -0.226103662 | 0.03216  | 0.047413 |
| AB57_1905 |      | UbiE/COQ5 methyltransferase                                     | -0.615338636 | 2.51E-07 | 9.25E-07 |
| AB57_1906 |      | poly(R)-hydroxyalkanoic acid synthase                           | -0.55061217  | 3.29E-07 | 1.19E-06 |
| AB57_1907 | metZ | O-succinylhomoserine sulfhydrylase                              | 1.193312138  | 2.05E-18 | 5.37E-17 |
| AB57_1908 |      | hypothetical protein                                            | -0.917515121 | 4.08E-11 | 2.86E-10 |
| AB57_1909 |      | hypothetical protein                                            | 0.411722982  | 0.001229 | 0.0024   |
| AB57_1910 | recR | recombination protein RecR                                      | 0.456166585  | 1.74E-05 | 4.69E-05 |
| AB57_1911 |      | ribonuclease D                                                  | 0.505096964  | 1.03E-06 | 3.49E-06 |
| AB57_1912 |      | hypothetical protein                                            | -0.608109867 | 6.27E-05 | 0.000154 |
| AB57_1914 |      | hypothetical protein                                            | -0.468524244 | 0.000155 | 0.000356 |
| AB57_1915 |      | hypothetical protein                                            | -1.148786072 | 1.06E-14 | 1.38E-13 |
| AB57_1916 |      | hypothetical protein                                            | -0.324229774 | 0.007101 | 0.012046 |
| AB57_1919 |      | AAA ATPase family protein                                       | 0.311453318  | 0.036891 | 0.053717 |
| AB57_1920 |      | hypothetical protein                                            | 0.550164245  | 0.002658 | 0.004877 |
| AB57_1921 | trpB | tryptophan synthase subunit beta                                | 0.577414282  | 1.58E-05 | 4.31E-05 |
| AB57_1922 | prmB | N5-glutamine S-adenosyl-L-methionine-dependent methyltransf     | 2.373108687  | 2.15E-26 | 2.21E-24 |
| AB57_1923 | aroC | chorismate synthase                                             | 1.747739757  | 2.25E-17 | 4.97E-16 |
| AB57_1924 |      | GGDEF domain protein                                            | -0.475214495 | 5.41E-06 | 1.61E-05 |
| AB57_1925 |      | hypothetical protein                                            | -0.301722283 | 0.010744 | 0.017474 |
| AB57_1926 |      | hypothetical protein                                            | -1.698541725 | 1.26E-13 | 1.34E-12 |
| AB57_1927 | lipA | lipoyl synthase                                                 | -0.365287078 | 0.001544 | 0.002963 |
| AB57_1928 |      | acetoin:2,6-dichlorophenolindophenol oxidoreductase alpha sul   | -0.941128336 | 8.92E-19 | 2.42E-17 |
| AB57_1929 |      | acetoin:2,6-dichlorophenolindophenol oxidoreductase subunit k   | -0.79627024  | 5.04E-15 | 7.18E-14 |
| AB57_1930 |      | dihydrolipoamide acetyltransferase                              | -0.32250713  | 0.003241 | 0.005866 |
| AB57_1931 | lpdA | dihydrolipoamide dehydrogenase                                  | -0.104584122 | 0.350711 | 0.410642 |
| AB57_1932 |      | acetoin dehydrogenase                                           | -0.232414347 | 0.031335 | 0.046394 |
| AB57_1933 |      | zinc-binding alcohol dehydrogenase                              | -0.18710262  | 0.077278 | 0.105275 |
| AB57_1934 |      | hypothetical protein                                            | 0.402975696  | 0.001786 | 0.003407 |
| AB57_1935 |      | sigma-54 specific, transcriptional regulator, Fis family        | -0.565554924 | 0.001789 | 0.00341  |
| AB57_1936 |      | metallo-beta-lactamase family protein                           | 1.588559026  | 3.96E-08 | 1.65E-07 |
| AB57_1937 |      | oxidoreductase                                                  | 2.146534046  | 4.13E-09 | 2.04E-08 |
| AB57_1938 |      | hypothetical protein                                            | 0.926174176  | 4.18E-06 | 1.28E-05 |
| AB57_1939 |      | homoserine dehydrogenase                                        | -0.421501678 | 0.000256 | 0.000565 |
| AB57_1940 |      | hypothetical protein                                            | -0.342307695 | 0.008575 | 0.014304 |
| AB57_1941 |      | transcriptional regulatory protein                              | -0.625028528 | 0.000286 | 0.000624 |
| AB57_1942 |      | transcriptional regulator, AraC type                            | -0.870599417 | 4.19E-16 | 7.37E-15 |
| AB57_1943 |      | fmn-dependent NADH-azoreductase                                 | -0.057651023 | 0.677839 | 0.721467 |
| AB57_1944 |      | chromate transporter                                            | -1.058886976 | 9.78E-20 | 3.07E-18 |
| AB57_1945 |      | transcriptional regulator, GntR family                          | 0.526270035  | 0.000244 | 0.000542 |
| AB57_1946 |      | putative oxidoreductase                                         | 0.652422917  | 1.02E-09 | 5.57E-09 |
| AB57_1947 |      | 4Fe-4S ferredoxin iron-sulfur binding                           | 1.303211198  | 7.58E-13 | 7.23E-12 |
| AB57_1948 |      | ABC-type transporter, periplasmic component: TauT family        | 1.657489716  | 1.45E-26 | 1.63E-24 |
| AB57_1949 |      | ABC-type nitrate/sulfonate/bicarbonate transport system perme   | 1.700354332  | 2.06E-35 | 6.36E-33 |
| AB57_1950 |      | aliphatic sulfonates import ATP-binding protein SsuB            | 2.114631942  | 1.69E-47 | 1.25E-44 |

|           |      |                                                                 |              |          |          |
|-----------|------|-----------------------------------------------------------------|--------------|----------|----------|
| AB57_1951 |      | HEAT domain containing protein                                  | 0.983301666  | 1.13E-14 | 1.45E-13 |
| AB57_1952 |      | hypothetical protein                                            | -0.770108626 | 2.78E-07 | 1.01E-06 |
| AB57_1953 |      | dicarboxylic acid transport protein; alpha-ketoglutarate permea | -1.08656334  | 1.06E-12 | 1.00E-11 |
| AB57_1954 |      | TonB-dependent siderophore receptor                             | 1.138877486  | 1.21E-08 | 5.48E-08 |
| AB57_1955 |      | aspartate ammonia-lyase                                         | 0.588756409  | 0.000234 | 0.00052  |
| AB57_1956 |      | hypothetical protein                                            | 1.010615107  | 2.77E-06 | 8.67E-06 |
| AB57_1958 |      | transcriptional regulator, LysR family                          | -0.244544399 | 0.022884 | 0.034801 |
| AB57_1959 |      | transcriptional regulator, LysR family                          | -0.01407521  | 0.890862 | 0.911053 |
| AB57_1960 |      | acetyl-CoA acetyltransferase                                    | 0.114029055  | 0.490092 | 0.549377 |
| AB57_1961 |      | short-chain fatty acid transporter                              | -0.697428778 | 5.77E-08 | 2.36E-07 |
| AB57_1962 |      | 3-oxoacid CoA-transferase, subunit B                            | -0.268847283 | 0.042888 | 0.061483 |
| AB57_1963 |      | 3-oxoacid CoA-transferase, subunit A                            | -0.006941907 | 0.955305 | 0.964692 |
| AB57_1964 |      | transcriptional regulator, LysR family                          | -0.607587787 | 1.17E-05 | 3.28E-05 |
| AB57_1966 |      | GntP family transporter                                         | -0.473936145 | 7.10E-05 | 0.000173 |
| AB57_1967 |      | 3-hydroxybutyrate dehydrogenase                                 | -0.283689916 | 0.011314 | 0.018305 |
| AB57_1968 |      | transcriptional regulator, AraC family                          | -2.046919506 | 1.31E-22 | 6.63E-21 |
| AB57_1969 |      | 4-hydroxybenzoate transporter                                   | -0.700964528 | 4.88E-07 | 1.73E-06 |
| AB57_1970 |      | dienelactone hydrolase                                          | 1.687183801  | 2.13E-34 | 5.37E-32 |
| AB57_1971 |      | short chain dehydrogenase                                       | 1.385931837  | 4.51E-11 | 3.12E-10 |
| AB57_1972 |      | oxygenase subunit                                               | 1.441124057  | 6.72E-12 | 5.45E-11 |
| AB57_1973 |      | nitrilotriacetate monooxygenase component B                     | 1.171087476  | 5.84E-07 | 2.04E-06 |
| AB57_1974 |      | hypothetical protein                                            | 0.673754013  | 0.001066 | 0.002107 |
| AB57_1975 |      | transcriptional regulator, AraC family                          | -1.392482498 | 3.83E-13 | 3.80E-12 |
| AB57_1976 |      | anthranilate dioxygenase reductase                              | 0.665508856  | 4.51E-07 | 1.60E-06 |
| AB57_1977 | antB | anthranilate 1,2-dioxygenase, small subunit                     | 1.207369045  | 1.19E-08 | 5.37E-08 |
| AB57_1978 | antA | anthranilate 1,2-dioxygenase, large subunit                     | 1.14536873   | 1.58E-12 | 1.43E-11 |
| AB57_1979 |      | transcriptional regulator, ModE family                          | -0.710563823 | 0.000925 | 0.001853 |
| AB57_1980 | modA | molybdate ABC transporter, periplasmic molybdate-binding pro    | -0.254153726 | 0.022556 | 0.034373 |
| AB57_1981 | modB | molybdate ABC transporter, permease protein                     | -0.122762033 | 0.365279 | 0.425412 |
| AB57_1982 | modC | molybdenum import ATP-binding protein ModC                      | -0.308882557 | 0.077643 | 0.105734 |
| AB57_1983 |      | 2,3-dihydro-2,3-dihydroxybenzoate dehydrogenase                 | -0.885202996 | 1.59E-06 | 5.24E-06 |
| AB57_1984 |      | isochorismatase                                                 | -0.197484043 | 0.184504 | 0.231962 |
| AB57_1985 |      | transcriptional regulator, fur family                           | -0.587024891 | 0.005372 | 0.009341 |
| AB57_1986 |      | 5'-nucleotidase                                                 | 0.227902384  | 0.068248 | 0.094047 |
| AB57_1987 | ppk  | polyphosphate kinase                                            | -0.824256906 | 1.72E-12 | 1.54E-11 |
| AB57_1988 |      | hypothetical protein                                            | -0.285670892 | 0.075991 | 0.103752 |
| AB57_1989 | pqqB | pyrroloquinoline quinone biosynthesis protein PqqB              | 0.652462841  | 2.71E-09 | 1.38E-08 |
| AB57_1990 | pqqC | pyrroloquinoline quinone biosynthesis protein PqqC              | 0.547700687  | 6.23E-06 | 1.84E-05 |
| AB57_1991 | pqqD | pyrroloquinoline quinone biosynthesis protein PqqD              | 0.441112888  | 0.00205  | 0.003857 |
| AB57_1992 | pqqE | pyrroloquinoline quinone biosynthesis protein PqqE              | 0.478459181  | 1.29E-05 | 3.57E-05 |
| AB57_1993 |      | dipeptidase                                                     | -0.661436496 | 8.38E-08 | 3.34E-07 |
| AB57_1994 |      | hypothetical protein                                            | -1.181698377 | 5.14E-13 | 4.98E-12 |
| AB57_1995 |      | hypothetical protein                                            | -1.069278121 | 2.02E-11 | 1.49E-10 |
| AB57_1996 |      | hypothetical protein                                            | -0.742796993 | 2.54E-08 | 1.09E-07 |
| AB57_1997 |      | phospholipase D/Transphosphatidylase                            | -0.601996051 | 4.34E-05 | 0.00011  |
| AB57_1998 |      | hypothetical protein                                            | -1.160885033 | 1.29E-12 | 1.19E-11 |
| AB57_1999 |      | hypothetical protein                                            | -0.571460039 | 9.38E-06 | 2.66E-05 |
| AB57_2000 |      | hypothetical protein                                            | -0.27638594  | 0.015232 | 0.023901 |
| AB57_2001 |      | hypothetical protein                                            | -0.524435345 | 4.38E-07 | 1.56E-06 |
| AB57_2002 |      | alcohol dehydrogenase                                           | 0.109199705  | 0.309519 | 0.368356 |
| AB57_2003 |      | hypothetical protein                                            | 0.033609814  | 0.759167 | 0.794826 |
| AB57_2004 |      | fimbrial protein                                                | 0.668874923  | 4.31E-07 | 1.54E-06 |
| AB57_2005 |      | outer membrane fimbrial usher protein                           | 1.534427145  | 7.24E-13 | 6.94E-12 |
| AB57_2006 |      | pili assembly chaperone                                         | 2.241373529  | 2.16E-14 | 2.61E-13 |
| AB57_2007 |      | fimbrial subunit                                                | 1.263290287  | 5.28E-07 | 1.86E-06 |
| AB57_2008 |      | phage replication protein                                       | 0.777234057  | 0.015055 | 0.023683 |
| AB57_2009 |      | hypothetical protein                                            | 0.422125218  | 0.000416 | 0.000886 |
| AB57_2010 |      | hypothetical protein                                            | -0.146491127 | 0.33236  | 0.392009 |

|           |                                        |              |          |          |
|-----------|----------------------------------------|--------------|----------|----------|
| AB57_2011 | hypothetical protein                   | 0.032057656  | 0.805925 | 0.838561 |
| AB57_2012 | hypothetical protein                   | -0.73684071  | 3.68E-09 | 1.83E-08 |
| AB57_2014 | putative phage-related protein         | -0.5713923   | 3.21E-06 | 9.96E-06 |
| AB57_2015 | hypothetical protein                   | -0.662318489 | 3.31E-08 | 1.40E-07 |
| AB57_2017 | replication protein                    | 0.566938593  | 0.020014 | 0.030804 |
| AB57_2018 | hypothetical protein                   | -0.07615274  | 0.473689 | 0.534019 |
| AB57_2019 | mobilization protein BmgB              | -0.32865625  | 0.011369 | 0.018385 |
| AB57_2020 | hypothetical protein                   | 1.205719587  | 0.01861  | 0.028786 |
| AB57_2021 | phage replication protein              | 0.764453464  | 0.014736 | 0.023252 |
| AB57_2022 | hypothetical protein                   | 0.413652576  | 0.000497 | 0.00104  |
| AB57_2023 | hypothetical protein                   | -0.012181787 | 0.934343 | 0.946468 |
| AB57_2024 | hypothetical protein                   | 0.014809245  | 0.91843  | 0.934034 |
| AB57_2025 | hypothetical protein                   | -0.782088487 | 1.06E-09 | 5.78E-09 |
| AB57_2027 | putative phage-related protein         | -0.58658978  | 6.21E-07 | 2.16E-06 |
| AB57_2028 | hypothetical protein                   | -0.675234586 | 1.60E-08 | 7.10E-08 |
| AB57_2030 | replication protein                    | 0.433446684  | 0.061766 | 0.085916 |
| AB57_2031 | hypothetical protein                   | -0.121631276 | 0.261068 | 0.31733  |
| AB57_2032 | hypothetical protein                   | -0.408423893 | 8.73E-05 | 0.00021  |
| AB57_2033 | hypothetical protein                   | -0.227544046 | 0.218776 | 0.270274 |
| AB57_2035 | putative phage-related protein         | -0.349899267 | 0.027948 | 0.041815 |
| AB57_2037 | replication protein                    | 0.486874607  | 0.039231 | 0.056767 |
| AB57_2038 | hypothetical protein                   | -0.020036101 | 0.856998 | 0.88252  |
| AB57_2039 | mobilization protein BmgB              | -0.466908663 | 0.000344 | 0.000739 |
| AB57_2040 | phage replication protein              | 0.760376904  | 0.014784 | 0.023317 |
| AB57_2041 | hypothetical protein                   | 0.355716294  | 0.003619 | 0.006492 |
| AB57_2042 | hypothetical protein                   | -0.141555492 | 0.318225 | 0.377261 |
| AB57_2043 | hypothetical protein                   | -0.225918165 | 0.093791 | 0.125145 |
| AB57_2044 | hypothetical protein                   | -0.805528553 | 4.24E-10 | 2.46E-09 |
| AB57_2046 | putative phage-related protein         | -0.706429437 | 1.82E-07 | 6.85E-07 |
| AB57_2047 | hypothetical protein                   | -0.668897028 | 4.37E-08 | 1.81E-07 |
| AB57_2048 | mobilization protein BmgB              | -0.442791212 | 0.000872 | 0.001754 |
| AB57_2049 | phage replication protein              | 0.702594085  | 0.03145  | 0.046528 |
| AB57_2050 | hypothetical protein                   | 0.436184972  | 0.000517 | 0.001079 |
| AB57_2052 | replication protein                    | 0.485230961  | 0.043378 | 0.062088 |
| AB57_2053 | hypothetical protein                   | -0.095625459 | 0.385725 | 0.445994 |
| AB57_2054 | mobilization protein BmgB              | -0.437893268 | 0.000975 | 0.001942 |
| AB57_2055 | hypothetical protein                   | 1.281017398  | 0.002143 | 0.004011 |
| AB57_2056 | phage replication protein              | 0.788941932  | 0.015449 | 0.024211 |
| AB57_2057 | hypothetical protein                   | 0.400429628  | 0.002111 | 0.003961 |
| AB57_2058 | hypothetical protein                   | -0.128989827 | 0.347675 | 0.407732 |
| AB57_2059 | hypothetical protein                   | -0.125697876 | 0.341601 | 0.402011 |
| AB57_2060 | hypothetical protein                   | -0.730662417 | 1.56E-08 | 6.93E-08 |
| AB57_2062 | putative phage-related protein         | -0.609884148 | 3.20E-07 | 1.16E-06 |
| AB57_2063 | hypothetical protein                   | -0.636442928 | 1.14E-07 | 4.44E-07 |
| AB57_2064 | hypothetical protein                   | -0.081665652 | 0.574488 | 0.628878 |
| AB57_2065 | hypothetical protein                   | 0.049762601  | 0.719543 | 0.760008 |
| AB57_2066 | hypothetical protein                   | -0.768350669 | 4.15E-11 | 2.90E-10 |
| AB57_2067 | hypothetical protein                   | -0.614801473 | 0.021294 | 0.032611 |
| AB57_2068 | putative phage-related protein         | -0.581539629 | 4.65E-06 | 1.41E-05 |
| AB57_2069 | hypothetical protein                   | -0.630531122 | 7.97E-09 | 3.71E-08 |
| AB57_2070 | hypothetical protein                   | -0.543977859 | 1.94E-06 | 6.26E-06 |
| AB57_2071 | hypothetical protein                   | -0.595725813 | 6.40E-05 | 0.000157 |
| AB57_2072 | phage replication protein              | 0.848121636  | 0.008893 | 0.014769 |
| AB57_2073 | hypothetical protein                   | 0.460421468  | 0.000112 | 0.000264 |
| AB57_2074 | outer membrane protein E               | -0.535898613 | 4.36E-06 | 1.33E-05 |
| AB57_2075 | hypothetical protein                   | 0.083120929  | 0.553447 | 0.610359 |
| AB57_2076 | putative oxidoreductase                | 0.182231393  | 0.110602 | 0.14527  |
| AB57_2077 | transcriptional regulator, TetR family | -0.023932719 | 0.821273 | 0.851418 |

|           |      |                                                               |              |          |          |
|-----------|------|---------------------------------------------------------------|--------------|----------|----------|
| AB57_2078 |      | flavin binding monooxygenase                                  | -0.440988846 | 0.001428 | 0.002754 |
| AB57_2079 |      | hypothetical protein                                          | 0.100925191  | 0.367389 | 0.427466 |
| AB57_2080 | adeC | multidrug efflux protein AdeC                                 | 0.442546663  | 0.004554 | 0.008009 |
| AB57_2081 | adeB | multidrug efflux protein AdeB                                 | 0.33538607   | 0.067813 | 0.093552 |
| AB57_2082 | adeA | multidrug efflux protein AdeA                                 | 1.704819852  | 1.09E-14 | 1.41E-13 |
| AB57_2083 | adeR | AdeR                                                          | -0.512218797 | 1.91E-06 | 6.19E-06 |
| AB57_2084 | adeS | AdeS                                                          | -0.38450281  | 0.00113  | 0.002223 |
| AB57_2085 |      | hypothetical protein                                          | -0.736972893 | 9.67E-05 | 0.00023  |
| AB57_2086 |      | hypothetical protein                                          | -0.353000606 | 0.091641 | 0.122852 |
| AB57_2087 |      | transcriptional regulator, AraC family                        | -0.206277844 | 0.129994 | 0.168292 |
| AB57_2088 |      | alpha/beta hydrolase                                          | -0.599810687 | 0.00016  | 0.000365 |
| AB57_2089 |      | short-chain dehydrogenase/reductase                           | -0.054965872 | 0.722061 | 0.76245  |
| AB57_2090 |      | short-chain dehydrogenase/reductase                           | 0.051538493  | 0.706195 | 0.74826  |
| AB57_2091 |      | transcriptional regulator, LysR family                        | -0.400075923 | 0.0283   | 0.04229  |
| AB57_2092 |      | dienelactone hydrolase                                        | -0.728986376 | 4.15E-08 | 1.73E-07 |
| AB57_2093 |      | acetyltransferase                                             | -0.069498055 | 0.526464 | 0.584609 |
| AB57_2094 |      | hypothetical protein                                          | -0.155178104 | 0.274817 | 0.331645 |
| AB57_2095 |      | endonuclease/exonuclease/phosphatase                          | -0.729509863 | 2.92E-07 | 1.06E-06 |
| AB57_2096 |      | hypothetical protein                                          | -0.443435975 | 0.000197 | 0.000444 |
| AB57_2097 |      | transcriptional regulator, TetR family                        | -0.63802903  | 0.007167 | 0.012147 |
| AB57_2099 |      | type III restriction enzyme, res subunit                      | -0.839493454 | 6.94E-11 | 4.61E-10 |
| AB57_2100 |      | guanosine-3',5'-bis(diphosphate) 3'-pyrophosphohydrolase ((pp | -0.382225027 | 0.0133   | 0.02123  |
| AB57_2101 |      | hypothetical protein                                          | -0.398064946 | 0.001182 | 0.002317 |
| AB57_2102 |      | putative acid phosphatase                                     | -0.14163115  | 0.347376 | 0.407512 |
| AB57_2103 |      | hypothetical protein                                          | -0.568666517 | 1.25E-05 | 3.47E-05 |
| AB57_2104 |      | outer membrane efflux protein                                 | 0.202408711  | 0.189191 | 0.23729  |
| AB57_2105 |      | auxin-responsive GH3-related protein                          | 0.572736548  | 1.98E-05 | 5.32E-05 |
| AB57_2106 |      | hypothetical protein                                          | 0.562010707  | 3.60E-06 | 1.10E-05 |
| AB57_2107 |      | multidrug resistance protein VceB                             | 0.273434539  | 0.043808 | 0.062655 |
| AB57_2108 |      | RND family drug transporter                                   | -0.355403251 | 0.01815  | 0.028111 |
| AB57_2109 |      | indoleacetamide hydrolase                                     | -0.941862568 | 2.17E-10 | 1.32E-09 |
| AB57_2110 |      | transcriptional regulator, LuxR family                        | -1.611988945 | 1.46E-16 | 2.73E-15 |
| AB57_2112 |      | methylenetetrahydrofolate reductase domain protein            | 0.85665658   | 9.57E-07 | 3.25E-06 |
| AB57_2113 |      | ADP-ribose pyrophosphatase                                    | -0.108435041 | 0.344804 | 0.405007 |
| AB57_2114 |      | putative nicotinate phosphoribosyltransferase                 | -0.106114784 | 0.352745 | 0.412372 |
| AB57_2115 |      | ribose-phosphate pyrophosphokinase                            | -0.123516155 | 0.598536 | 0.650392 |
| AB57_2118 |      | 2-hydroxy-3-oxopropionate reductase                           | -0.549973745 | 0.000332 | 0.000716 |
| AB57_2119 |      | transporter, anion:cation symporter family                    | -0.967885872 | 1.40E-13 | 1.48E-12 |
| AB57_2120 |      | nucleoside-diphosphate-sugar epimerase                        | -0.87575614  | 6.39E-05 | 0.000156 |
| AB57_2121 |      | transcriptional regulator, LysR family                        | -0.025290667 | 0.826876 | 0.856267 |
| AB57_2122 |      | fumarylacetoacetate hydrolase                                 | -0.078848074 | 0.639801 | 0.68676  |
| AB57_2123 |      | dihydroxy-acid dehydratase                                    | 0.182917741  | 0.161065 | 0.20437  |
| AB57_2124 |      | NADP-dependent fatty aldehyde dehydrogenase                   | 0.483401616  | 0.000104 | 0.000246 |
| AB57_2125 |      | transcriptional regulator, TetR family                        | -0.039875371 | 0.733946 | 0.772795 |
| AB57_2126 |      | transporter, major facilitator family                         | -0.363011437 | 0.044926 | 0.064032 |
| AB57_2127 |      | multidrug resistance efflux pump                              | -0.646707363 | 1.28E-07 | 4.96E-07 |
| AB57_2128 |      | hypothetical protein                                          | -0.494739113 | 0.004506 | 0.007943 |
| AB57_2129 |      | hypothetical protein                                          | -0.238933576 | 0.287527 | 0.345406 |
| AB57_2130 |      | transcriptional regulator, LysR family                        | -0.373851602 | 0.007824 | 0.013147 |
| AB57_2131 |      | transporter, major facilitator family                         | -1.007056499 | 6.99E-15 | 9.51E-14 |
| AB57_2132 |      | senescence marker protein-30                                  | -0.672192094 | 0.000233 | 0.000518 |
| AB57_2133 |      | transcriptional regulator, GntR family                        | -0.368336833 | 0.005691 | 0.009831 |
| AB57_2134 |      | hypothetical protein                                          | -0.206907836 | 0.083625 | 0.113006 |
| AB57_2135 |      | amidohydrolase family protein                                 | -0.136908881 | 0.376873 | 0.436851 |
| AB57_2136 |      | transporter, anion:cation symporter (ACS) family              | -0.482482202 | 4.93E-06 | 1.48E-05 |
| AB57_2137 |      | hypothetical protein                                          | -0.146549292 | 0.156602 | 0.199115 |
| AB57_2138 |      | hypothetical protein                                          | -0.46969674  | 8.28E-05 | 0.000199 |
| AB57_2139 |      | hypothetical protein                                          | -0.865377637 | 4.75E-07 | 1.69E-06 |

|           |      |                                                           |              |          |          |
|-----------|------|-----------------------------------------------------------|--------------|----------|----------|
| AB57_2140 |      | hypothetical protein                                      | -0.442000531 | 2.84E-05 | 7.45E-05 |
| AB57_2141 |      | hypothetical protein                                      | -0.267522965 | 0.044304 | 0.063267 |
| AB57_2142 |      | hypothetical protein                                      | -0.819815872 | 8.00E-06 | 2.31E-05 |
| AB57_2143 |      | hypothetical protein                                      | -0.563444605 | 4.63E-05 | 0.000117 |
| AB57_2144 |      | hypothetical protein                                      | -0.375946211 | 0.007956 | 0.013356 |
| AB57_2145 |      | transcriptional regulator, TetR family                    | 0.023331101  | 0.92504  | 0.938226 |
| AB57_2147 |      | thermostable carboxypeptidase 1                           | -0.295283659 | 0.05267  | 0.074212 |
| AB57_2148 |      | hypothetical protein                                      | -0.466338263 | 0.00731  | 0.012356 |
| AB57_2149 |      | glutathione-regulated potassium-efflux system protein     | -0.067027412 | 0.510098 | 0.569168 |
| AB57_2150 |      | quinoprotein glucose dehydrogenase-B                      | 0.621000109  | 1.16E-05 | 3.25E-05 |
| AB57_2151 |      | transcriptional regulator, LysR family                    | -0.321734038 | 0.003044 | 0.005529 |
| AB57_2152 |      | isochorismatase hydrolase                                 | 0.712329953  | 1.28E-09 | 6.87E-09 |
| AB57_2153 |      | antibiotic biosynthesis monooxygenase                     | 0.404155047  | 0.00045  | 0.000951 |
| AB57_2154 |      | hypothetical protein                                      | -0.831324889 | 2.42E-07 | 8.96E-07 |
| AB57_2155 |      | L-sorbose dehydrogenase                                   | -1.195167531 | 5.22E-21 | 2.06E-19 |
| AB57_2156 |      | oxidoreductase, FAD/FMN-binding                           | -0.249648781 | 0.054501 | 0.076617 |
| AB57_2157 |      | hypothetical protein                                      | -0.079902985 | 0.627607 | 0.675632 |
| AB57_2158 |      | putative acetoacetate decarboxylase                       | -0.316025169 | 0.14435  | 0.184617 |
| AB57_2159 |      | short-chain dehydrogenase                                 | -0.26816924  | 0.290806 | 0.348666 |
| AB57_2160 |      | transcriptional regulator, AraC family                    | -0.613788919 | 0.003969 | 0.007064 |
| AB57_2161 |      | transcriptional regulator, TetR family                    | 0.0860609    | 0.660667 | 0.705474 |
| AB57_2162 |      | zinc-dependent hydrolase                                  | -0.683148287 | 1.04E-08 | 4.72E-08 |
| AB57_2163 |      | transcriptional regulator, BadM/Rrf2 family               | 0.219039382  | 0.065957 | 0.091217 |
| AB57_2164 |      | NADH dehydrogenase fad-containing subunit                 | 0.071689486  | 0.531695 | 0.589356 |
| AB57_2165 |      | ThiJ/Pfpl domain protein                                  | -1.641238475 | 2.55E-36 | 8.58E-34 |
| AB57_2166 |      | transcriptional regulator, MerR family                    | -0.57079324  | 0.00824  | 0.01377  |
| AB57_2167 |      | ThiJ/Pfpl domain protein                                  | -0.458321106 | 0.010239 | 0.016718 |
| AB57_2168 |      | saccharopine dehydrogenase                                | -0.900862211 | 2.89E-09 | 1.46E-08 |
| AB57_2169 |      | oxidoreductase FMN-binding                                | -0.561292022 | 0.00029  | 0.000633 |
| AB57_2170 |      | alpha/beta hydrolase                                      | -0.352074115 | 0.002742 | 0.005022 |
| AB57_2171 |      | hypothetical protein                                      | -0.711187722 | 4.58E-08 | 1.89E-07 |
| AB57_2172 |      | NADP-dependent fatty aldehyde dehydrogenase               | 0.580768773  | 0.001271 | 0.002477 |
| AB57_2173 |      | hypothetical protein                                      | 0.456218384  | 0.027444 | 0.041111 |
| AB57_2174 |      | MFS family permease                                       | -0.653437856 | 9.74E-05 | 0.000232 |
| AB57_2175 |      | dihydroxy-acid dehydratase                                | -0.485367915 | 0.002186 | 0.004079 |
| AB57_2176 |      | transcriptional regulator, GntR family                    | -0.206928789 | 0.051177 | 0.072246 |
| AB57_2177 |      | hypothetical protein                                      | -0.213759569 | 0.061345 | 0.08549  |
| AB57_2178 | catR | ben operon transcriptional regulator BenM                 | -0.169730408 | 0.189049 | 0.237193 |
| AB57_2179 |      | muconate cycloisomerase                                   | -0.987934095 | 2.45E-11 | 1.77E-10 |
| AB57_2180 | catC | muconolactone delta-isomerase                             | -0.377921363 | 0.001238 | 0.002415 |
| AB57_2181 | catA | catechol 1,2-dioxygenase                                  | 0.145329828  | 0.360394 | 0.420517 |
| AB57_2182 |      | 3-oxoadipate CoA-transferase subunit A                    | 0.094210473  | 0.372249 | 0.43244  |
| AB57_2183 |      | 3-oxoadipate CoA-transferase subunit B                    | -0.29669327  | 0.004885 | 0.008546 |
| AB57_2184 | pcaF | beta-ketoadipyl CoA thiolase                              | 0.5293954    | 0.00025  | 0.000553 |
| AB57_2185 | pcaD | 3-oxoadipate enol-lactonase                               | 0.156278783  | 0.204246 | 0.254191 |
| AB57_2186 |      | peptidase S45, penicillin amidase                         | -0.516603152 | 1.83E-06 | 5.96E-06 |
| AB57_2187 |      | phenylacetaldehyde dehydrogenase                          | -0.104192052 | 0.441241 | 0.50249  |
| AB57_2188 |      | hypothetical protein                                      | -0.188952796 | 0.365453 | 0.42548  |
| AB57_2189 |      | tyramine oxidase                                          | -0.68715743  | 2.66E-07 | 9.77E-07 |
| AB57_2190 |      | transcriptional regulator, AraC family                    | -0.718444507 | 0.002314 | 0.0043   |
| AB57_2191 |      | P-hydroxyphenylacetate hydroxylase C1:reductase component | 0.569040744  | 0.000181 | 0.00041  |
| AB57_2192 |      | 2Fe-2S iron-sulfur cluster binding domain protein         | 1.0073271    | 5.14E-13 | 4.98E-12 |
| AB57_2193 |      | short-chain dehydrogenase/reductase                       | 0.808186892  | 4.41E-09 | 2.16E-08 |
| AB57_2194 |      | aromatic-ring-hydroxylating dioxygenase beta subunit      | 0.671337553  | 6.10E-07 | 2.13E-06 |
| AB57_2195 |      | ring hydroxylating dioxygenase, Rieske                    | 0.476223838  | 0.004001 | 0.007118 |
| AB57_2196 |      | hypothetical protein                                      | -0.055058928 | 0.662272 | 0.706984 |
| AB57_2197 |      | hypothetical protein                                      | -0.091348295 | 0.481114 | 0.541286 |
| AB57_2198 |      | acyl-CoA dehydrogenase                                    | -0.456151274 | 0.000422 | 0.000897 |



|           |      |                                                               |              |          |          |
|-----------|------|---------------------------------------------------------------|--------------|----------|----------|
| AB57_2199 |      | Glu-tRNA amidotransferase                                     | -0.721925508 | 1.12E-10 | 7.12E-10 |
| AB57_2200 |      | transcriptional regulator, MarR-family                        | -0.102183295 | 0.399408 | 0.459947 |
| AB57_2202 |      | general substrate transporter:Major facilitator superfamily   | -1.439472182 | 2.18E-34 | 5.37E-32 |
| AB57_2203 |      | benzoate transport porin                                      | -1.456220265 | 1.33E-22 | 6.63E-21 |
| AB57_2204 |      | short chain dehydrogenase                                     | 0.070779307  | 0.539844 | 0.597316 |
| AB57_2205 |      | phosphoglycerate mutase                                       | 0.401926666  | 0.000845 | 0.001702 |
| AB57_2206 |      | aminoglycoside phosphotransferase                             | -0.054788392 | 0.607731 | 0.658449 |
| AB57_2207 |      | acyl-CoA dehydrogenase domain protein                         | -0.041499013 | 0.697012 | 0.739377 |
| AB57_2208 |      | transcriptional regulator, LysR family                        | 0.02924771   | 0.832865 | 0.861128 |
| AB57_2209 |      | pca operon regulatory protein                                 | 0.362206034  | 0.005821 | 0.010036 |
| AB57_2210 |      | metallo-beta-lactamase family protein                         | -0.576225704 | 2.63E-06 | 8.24E-06 |
| AB57_2211 |      | hypothetical protein                                          | -0.973215391 | 1.64E-15 | 2.54E-14 |
| AB57_2212 |      | hypothetical protein                                          | -0.45327867  | 0.001313 | 0.00255  |
| AB57_2213 |      | hypothetical protein                                          | -0.199728304 | 0.085444 | 0.115171 |
| AB57_2214 |      | quininate/shikimate dehydrogenase                             | -0.336375445 | 0.033371 | 0.049036 |
| AB57_2215 |      | porin B                                                       | 0.547691263  | 0.000175 | 0.000396 |
| AB57_2216 |      | 3-dehydroshikimate dehydratase                                | 0.535569799  | 0.001522 | 0.002923 |
| AB57_2217 | aroD | 3-dehydroquininate dehydratase                                | 0.896571198  | 4.20E-10 | 2.45E-09 |
| AB57_2218 | pcaG | protocatechuate 3,4-dioxygenase, alpha subunit                | 1.220450836  | 2.25E-16 | 4.13E-15 |
| AB57_2219 | pcaH | protocatechuate 3,4-dioxygenase, beta subunit                 | 1.24123999   | 2.39E-17 | 5.24E-16 |
| AB57_2220 | pcaC | 4-carboxymuconolactone decarboxylase                          | 1.451032065  | 4.85E-21 | 1.93E-19 |
| AB57_2221 |      | 4-hydroxybenzoate transporter                                 | 0.996146758  | 4.21E-10 | 2.45E-09 |
| AB57_2222 | pcaD | 3-oxoadipate enol-lactonase                                   | 0.606610397  | 3.49E-06 | 1.07E-05 |
| AB57_2223 | pcaB | 3-carboxy-cis,cis-muconate cycloisomerase                     | 0.333771208  | 0.015212 | 0.02388  |
| AB57_2224 | pcaF | beta-ketoadipyl CoA thiolase                                  | 0.375064625  | 0.00403  | 0.007159 |
| AB57_2225 |      | 3-oxoadipate CoA-transferase subunit B                        | 0.361121764  | 0.001006 | 0.001998 |
| AB57_2226 |      | 3-oxoadipate CoA-transferase subunit A                        | 0.154190971  | 0.130605 | 0.168965 |
| AB57_2227 | ispD | 2-C-methyl-D-erythritol 4-phosphate cytidyltransferase        | 0.08629036   | 0.522845 | 0.581288 |
| AB57_2228 |      | septum formation initiator                                    | -0.887228708 | 8.47E-11 | 5.56E-10 |
| AB57_2229 |      | hypothetical protein                                          | -0.829516633 | 1.41E-12 | 1.29E-11 |
| AB57_2230 | eno  | phosphopyruvate hydratase                                     | 1.691288509  | 2.05E-16 | 3.79E-15 |
| AB57_2231 |      | 2-dehydro-3-deoxyphosphooctonate aldolase                     | 1.33835918   | 2.23E-15 | 3.35E-14 |
| AB57_2232 | pyrG | CTP synthetase                                                | 0.754962928  | 4.57E-05 | 0.000115 |
| AB57_2233 |      | hypothetical protein                                          | 1.046419737  | 2.99E-13 | 3.01E-12 |
| AB57_2236 |      | alpha/beta hydrolase                                          | -0.161510347 | 0.131666 | 0.170099 |
| AB57_2237 |      | hypothetical protein                                          | -0.373099734 | 0.002132 | 0.003994 |
| AB57_2238 |      | NADH:flavin oxidoreductase/nadh oxidase                       | -0.109852728 | 0.505982 | 0.565185 |
| AB57_2239 |      | FAD/FMN-binding/pyridine nucleotide-disulphide oxidoreductase | -0.282373618 | 0.039917 | 0.057693 |
| AB57_2240 |      | transcriptional regulator, PadR family                        | -0.196477002 | 0.110873 | 0.145574 |
| AB57_2241 |      | putative peroxidase                                           | -0.633686971 | 4.50E-10 | 2.60E-09 |
| AB57_2242 |      | phospho-2-dehydro-3-deoxyheptonate aldolase                   | -0.215673603 | 0.110153 | 0.144784 |
| AB57_2243 |      | hypothetical protein                                          | -0.551026998 | 1.31E-06 | 4.37E-06 |
| AB57_2244 | clpA | ATP-dependent Clp protease ATP-binding subunit                | -1.123284154 | 1.20E-12 | 1.11E-11 |
| AB57_2245 | clpS | ATP-dependent Clp protease adaptor protein ClpS               | 0.099796212  | 0.329296 | 0.389264 |
| AB57_2246 |      | hypothetical protein                                          | 0.375126905  | 0.000612 | 0.001262 |
| AB57_2247 | argC | N-acetyl-gamma-glutamyl-phosphate reductase                   | 0.806972971  | 2.21E-09 | 1.14E-08 |
| AB57_2249 |      | hypothetical protein                                          | 0.125688758  | 0.239495 | 0.294005 |
| AB57_2250 |      | hypothetical protein                                          | -0.736614396 | 2.05E-07 | 7.61E-07 |
| AB57_2251 | rpiA | ribose-5-phosphate isomerase A                                | 0.53062348   | 9.15E-05 | 0.000219 |
| AB57_2252 | ilvA | threonine dehydratase                                         | 1.019547145  | 1.35E-08 | 6.07E-08 |
| AB57_2253 |      | K+ uptake system component                                    | -0.052839481 | 0.647526 | 0.693243 |
| AB57_2254 |      | K+ uptake system component                                    | -0.576546644 | 7.87E-09 | 3.67E-08 |
| AB57_2255 |      | phospholipase                                                 | 0.324252223  | 0.047842 | 0.067875 |
| AB57_2256 |      | peptidase M16 domain protein                                  | 0.707172841  | 0.000347 | 0.000745 |
| AB57_2257 |      | ferrichrome-iron receptor                                     | 0.386848219  | 0.00484  | 0.008475 |
| AB57_2258 |      | ferrichrome-iron receptor                                     | 1.005878197  | 1.36E-09 | 7.26E-09 |
| AB57_2259 |      | sugar kinase, ribokinase family                               | 1.543206088  | 1.16E-16 | 2.23E-15 |
| AB57_2260 |      | iron-sulfur cluster-binding protein, Rieske family            | 0.841733269  | 9.79E-07 | 3.32E-06 |

|           |      |                                                               |              |          |          |
|-----------|------|---------------------------------------------------------------|--------------|----------|----------|
| AB57_2261 |      | hypothetical protein                                          | -0.516355147 | 1.13E-06 | 3.80E-06 |
| AB57_2262 |      | cytochrome D ubiquinol oxidase subunit I                      | -0.107680267 | 0.505244 | 0.564604 |
| AB57_2263 | cydB | cytochrome D ubiquinol oxidase, subunit II                    | 0.104258434  | 0.555024 | 0.611916 |
| AB57_2264 |      | hypothetical protein                                          | -0.266815235 | 0.147001 | 0.187747 |
| AB57_2265 |      | hypothetical protein                                          | 0.961636232  | 2.17E-06 | 6.91E-06 |
| AB57_2266 |      | nitroreductase family protein                                 | 0.288364433  | 0.018895 | 0.029178 |
| AB57_2267 | ftsY | signal recognition particle-docking protein FtsY              | 0.898032316  | 1.51E-09 | 8.07E-09 |
| AB57_2268 |      | hypothetical protein                                          | -0.091183435 | 0.418438 | 0.479771 |
| AB57_2269 |      | hypothetical protein                                          | -0.332144165 | 0.266636 | 0.323354 |
| AB57_2270 |      | hypothetical protein                                          | -1.004131755 | 3.79E-06 | 1.16E-05 |
| AB57_2272 |      | hypothetical protein                                          | 0.269061212  | 0.014614 | 0.023072 |
| AB57_2273 |      | CBS domain containing protein                                 | -0.131714272 | 0.308698 | 0.367498 |
| AB57_2274 |      | acetylornithine aminotransferase                              | 0.847690186  | 1.00E-11 | 7.86E-11 |
| AB57_2275 |      | glutaredoxin-related protein                                  | 0.932095209  | 7.48E-12 | 6.03E-11 |
| AB57_2276 |      | hypothetical protein                                          | -0.589418282 | 1.22E-07 | 4.73E-07 |
| AB57_2277 |      | transcriptional regulator, LysR family                        | -0.174275098 | 0.119355 | 0.15562  |
| AB57_2278 | map  | methionine aminopeptidase, type I                             | -0.332397197 | 0.000904 | 0.001814 |
| AB57_2279 | brnQ | branched-chain amino acid transport system II carrier protein | 1.170654669  | 3.08E-09 | 1.56E-08 |
| AB57_2280 |      | glycolate/propanediol utilization protein                     | 0.045420531  | 0.712637 | 0.754006 |
| AB57_2281 |      | hypothetical protein                                          | -0.180611889 | 0.276127 | 0.333117 |
| AB57_2282 |      | hypothetical protein                                          | -0.464122115 | 0.000151 | 0.000347 |
| AB57_2283 |      | alpha/beta hydrolase                                          | -0.576285805 | 0.00349  | 0.006275 |
| AB57_2284 |      | alpha/beta hydrolase                                          | -0.296114468 | 0.09537  | 0.126932 |
| AB57_2285 |      | multiphosphoryl transfer protein                              | 0.902616405  | 2.23E-11 | 1.63E-10 |
| AB57_2286 | pfkB | 1-phosphofructokinase                                         | 0.940095269  | 1.05E-15 | 1.70E-14 |
| AB57_2287 |      | PTS system fructose-specific EIIBC component                  | 0.680948162  | 4.56E-06 | 1.38E-05 |
| AB57_2288 |      | hypothetical protein                                          | -0.597832626 | 1.14E-07 | 4.44E-07 |
| AB57_2289 |      | transcriptional regulator, MarR-family                        | -0.905244109 | 3.86E-14 | 4.51E-13 |
| AB57_2290 |      | hypothetical protein                                          | -0.079835654 | 0.653978 | 0.699745 |
| AB57_2291 |      | GGDEF family protein                                          | -0.557114094 | 1.15E-07 | 4.47E-07 |
| AB57_2292 |      | UspA domain protein                                           | -0.552444684 | 4.22E-05 | 0.000108 |
| AB57_2293 |      | quinoprotein glucose dehydrogenase-B                          | -1.89222851  | 2.34E-23 | 1.31E-21 |
| AB57_2294 |      | hypothetical protein                                          | -1.282781021 | 4.26E-22 | 2.00E-20 |
| AB57_2295 |      | sulfate permease                                              | -0.105024153 | 0.427142 | 0.488238 |
| AB57_2296 |      | extracellular serine protease                                 | -1.250961061 | 4.79E-10 | 2.76E-09 |
| AB57_2297 |      | hypothetical protein                                          | -0.523679041 | 0.000116 | 0.000273 |
| AB57_2298 |      | proline-specific permease ProY                                | -0.154993634 | 0.182477 | 0.229725 |
| AB57_2299 | kynU | kynureninase                                                  | -0.002309789 | 0.985964 | 0.9881   |
| AB57_2300 |      | transcriptional regulator, AsnC family                        | -0.707655107 | 0.000354 | 0.000758 |
| AB57_2301 |      | acetyltransferase gnat family                                 | -0.783471695 | 4.00E-09 | 1.98E-08 |
| AB57_2302 |      | hypothetical protein                                          | -0.848791182 | 2.53E-09 | 1.29E-08 |
| AB57_2303 |      | hypothetical protein                                          | -0.680045701 | 4.82E-09 | 2.32E-08 |
| AB57_2304 |      | putative prophage protein                                     | -0.465577084 | 0.00023  | 0.000512 |
| AB57_2305 |      | HAD-superfamily hydrolase                                     | 0.622334236  | 2.70E-07 | 9.90E-07 |
| AB57_2306 |      | heat shock protein 15                                         | 0.284650769  | 0.038271 | 0.055509 |
| AB57_2307 | recA | recombinase A                                                 | 0.46239164   | 0.005453 | 0.009458 |
| AB57_2308 | recX | regulatory protein RecX                                       | -0.317298036 | 0.025089 | 0.037828 |
| AB57_2309 |      | hypothetical protein                                          | 0.113930751  | 0.386539 | 0.446796 |
| AB57_2310 | lpxA | UDP-N-acetylglucosamine acyltransferase                       | 1.141677694  | 1.63E-12 | 1.46E-11 |
| AB57_2311 | fabZ | (3R)-hydroxymyristoyl-ACP dehydratase                         | 0.975871393  | 7.07E-11 | 4.69E-10 |
| AB57_2312 | lpxD | UDP-3-O-[3-hydroxymyristoyl] glucosamine N-acyltransferase    | 0.635120007  | 1.85E-05 | 4.99E-05 |
| AB57_2313 |      | putative outer membrane protein                               | -0.053730214 | 0.67838  | 0.721473 |
| AB57_2314 |      | outer membrane protein assembly complex                       | 0.330044554  | 0.045806 | 0.065135 |
| AB57_2315 | rseP | peptidase M50, putative membrane-associated zinc metallopep   | 0.40870147   | 0.010375 | 0.016931 |
| AB57_2316 | dxr  | 1-deoxy-D-xylulose 5-phosphate reductoisomerase               | 1.272992085  | 6.74E-15 | 9.24E-14 |
| AB57_2317 | cdsA | phosphatidate cytidyltransferase                              | 0.943404021  | 8.76E-09 | 4.04E-08 |
| AB57_2318 | uppS | undecaprenyl diphosphate synthase                             | 1.239468555  | 2.35E-12 | 2.08E-11 |
| AB57_2319 | frr  | ribosome recycling factor                                     | 1.518659581  | 2.42E-17 | 5.26E-16 |

|           |      |                                                                 |              |          |          |
|-----------|------|-----------------------------------------------------------------|--------------|----------|----------|
| AB57_2320 | pyrH | uridylate kinase                                                | 2.252804223  | 5.55E-24 | 3.60E-22 |
| AB57_2321 |      | ribosomal protein S12 methylthiotransferase                     | 1.709954135  | 6.91E-15 | 9.43E-14 |
| AB57_2323 | ntrB | signal transduction histidine kinase, nitrogen specific, NtrB   | 0.085203813  | 0.447582 | 0.50768  |
| AB57_2324 | ntrC | nitrogen metabolism transcriptional regulator, NtrC, Fis Family | 0.306415987  | 0.044481 | 0.063496 |
| AB57_2325 |      | transcriptional regulator, TetR family                          | 0.085948705  | 0.442262 | 0.503343 |
| AB57_2326 | argF | ornithine carbamoyltransferase                                  | 0.930545942  | 2.87E-11 | 2.05E-10 |
| AB57_2327 | ispF | 2-C-methyl-D-erythritol 2,4-cyclodiphosphate synthase           | -0.084454838 | 0.422107 | 0.483379 |
| AB57_2328 |      | hypothetical protein                                            | -0.298649137 | 0.029241 | 0.043555 |
| AB57_2329 |      | hypothetical protein                                            | -0.75816077  | 5.79E-12 | 4.76E-11 |
| AB57_2330 |      | D-amino acid dehydrogenase small subunit                        | -0.805613374 | 1.97E-09 | 1.03E-08 |
| AB57_2331 |      | hypothetical protein                                            | 0.351616197  | 0.024962 | 0.037666 |
| AB57_2333 |      | hypothetical protein                                            | -1.023015865 | 1.40E-16 | 2.64E-15 |
| AB57_2334 | fumC | fumarate hydratase                                              | -0.256585416 | 0.050245 | 0.071066 |
| AB57_2335 |      | UDP-glucose 4-epimerase                                         | -0.55205603  | 0.000277 | 0.000608 |
| AB57_2336 | tusD | sulfur relay protein TusD/DsrE                                  | -0.7936547   | 2.34E-10 | 1.42E-09 |
| AB57_2337 |      | hypothetical protein                                            | -0.276928694 | 0.014403 | 0.022765 |
| AB57_2338 |      | hypothetical protein                                            | -0.024397929 | 0.879927 | 0.901614 |
| AB57_2339 |      | DsrC family protein                                             | -0.230085408 | 0.115762 | 0.15135  |
| AB57_2340 |      | hypothetical protein                                            | -0.300843038 | 0.094796 | 0.126258 |
| AB57_2341 |      | transcriptional regulator, HxLR family                          | -0.217570574 | 0.04127  | 0.059508 |
| AB57_2342 |      | transcriptional regulator, GntR family                          | -0.024447661 | 0.864046 | 0.889035 |
| AB57_2343 |      | molybdopterin biosynthesis protein                              | -0.103370935 | 0.380215 | 0.440174 |
| AB57_2344 |      | molybdopterin biosynthesis protein                              | 0.347702987  | 0.021941 | 0.033559 |
| AB57_2345 |      | bifunctional molybdenum cofactor biosynthesis protein MoaC/M    | -0.012163468 | 0.92219  | 0.936105 |
| AB57_2346 | moaE | molybdopterin converting factor, subunit 2                      | -1.088906423 | 1.48E-25 | 1.33E-23 |
| AB57_2347 |      | hypothetical protein                                            | -1.235287421 | 2.02E-23 | 1.17E-21 |
| AB57_2348 | moaA | molybdenum cofactor biosynthesis protein A                      | -1.361013905 | 2.61E-08 | 1.12E-07 |
| AB57_2349 |      | molybdopterin oxidoreductase                                    | -0.928162609 | 7.59E-10 | 4.26E-09 |
| AB57_2350 |      | molybdopterin-guanine dinucleotide synthase                     | -0.210076254 | 0.213276 | 0.264273 |
| AB57_2351 |      | molybdopterin oxidoreductase                                    | -0.478882341 | 8.60E-05 | 0.000207 |
| AB57_2352 |      | FAD-dependent pyridine nucleotide-disulphide oxidoreductase     | -0.427221109 | 0.002126 | 0.003984 |
| AB57_2353 | nirB | nitrite reductase [NAD(P)H], large subunit                      | -0.526671055 | 4.18E-05 | 0.000107 |
| AB57_2354 |      | response regulator protein                                      | 0.02423734   | 0.920568 | 0.934972 |
| AB57_2355 |      | putative nitrate transport protein                              | -0.354850765 | 0.0206   | 0.031653 |
| AB57_2356 |      | DNA repair protein UmuC                                         | -0.224159676 | 0.273326 | 0.330169 |
| AB57_2357 |      | DNA repair protein                                              | -0.373680527 | 0.033791 | 0.049575 |
| AB57_2358 | aroQ | 3-dehydroquininate dehydratase                                  | 0.239125545  | 0.066244 | 0.091558 |
| AB57_2359 | accB | acetyl-CoA carboxylase, biotin carboxyl carrier protein         | 1.350914269  | 2.62E-20 | 8.88E-19 |
| AB57_2360 | accC | acetyl-CoA carboxylase, biotin carboxylase                      | 1.208532983  | 2.34E-10 | 1.42E-09 |
| AB57_2361 |      | hypothetical protein                                            | -0.444366929 | 0.000122 | 0.000287 |
| AB57_2362 |      | metabolite transporter, MFS superfamily                         | 0.089949784  | 0.465445 | 0.525846 |
| AB57_2363 |      | hypothetical protein                                            | -1.030407178 | 1.57E-06 | 5.18E-06 |
| AB57_2364 |      | transcriptional regulator, TetR family                          | -0.87849616  | 3.76E-11 | 2.66E-10 |
| AB57_2366 |      | PepSY-associated TM helix domain protein                        | -0.069260035 | 0.632666 | 0.679694 |
| AB57_2367 |      | PepSY-associated TM helix domain protein                        | 0.073619516  | 0.557346 | 0.61411  |
| AB57_2368 |      | Glutamate synthase (NADPH)                                      | -0.021580423 | 0.833873 | 0.861824 |
| AB57_2369 |      | hypothetical protein                                            | -0.849915754 | 1.35E-15 | 2.10E-14 |
| AB57_2370 |      | hypothetical protein                                            | -0.292110699 | 0.003601 | 0.006463 |
| AB57_2371 | murB | UDP-N-acetylenolpyruvoylglucosamine reductase                   | 0.728434852  | 1.10E-08 | 5.00E-08 |
| AB57_2372 |      | protein tyrosine phosphatase                                    | 0.221158915  | 0.063974 | 0.088753 |
| AB57_2373 |      | hypothetical protein                                            | -0.034227769 | 0.735503 | 0.773994 |
| AB57_2374 |      | iron-containing alcohol dehydrogenase                           | -0.329932371 | 0.002038 | 0.003838 |
| AB57_2375 |      | thioesterase family protein                                     | 0.087275006  | 0.443982 | 0.504835 |
| AB57_2376 |      | phospholipase C, phosphocholine-specific                        | 0.026464094  | 0.809285 | 0.841584 |
| AB57_2377 |      | DNA polymerase III subunit tau                                  | 0.22966408   | 0.072405 | 0.099201 |
| AB57_2378 |      | methyl viologen resistance protein                              | 0.62267065   | 0.002488 | 0.004594 |
| AB57_2379 |      | transcriptional regulator, TetR family                          | 0.34354498   | 0.002008 | 0.003793 |
| AB57_2380 |      | beta-lactamase                                                  | -0.082652504 | 0.407112 | 0.468091 |

|           |      |                                                           |              |          |          |
|-----------|------|-----------------------------------------------------------|--------------|----------|----------|
| AB57_2381 |      | MaoC domain protein dehydratase                           | 0.827780118  | 7.87E-08 | 3.16E-07 |
| AB57_2382 |      | 3-ketoacyl-(acyl-carrier-protein) reductase               | 0.054870572  | 0.768747 | 0.80372  |
| AB57_2383 |      | acetyl-CoA acetyltransferase                              | 0.205395406  | 0.372424 | 0.432498 |
| AB57_2384 |      | hypothetical protein                                      | 0.315561051  | 0.05686  | 0.079629 |
| AB57_2385 |      | transcriptional regulator, LysR family                    | 0.007206635  | 0.964843 | 0.9722   |
| AB57_2386 | tal  | transaldolase B                                           | -0.167464625 | 0.261903 | 0.318136 |
| AB57_2387 |      | leucine export protein LeuE                               | 0.036816847  | 0.741724 | 0.779653 |
| AB57_2388 |      | leucine-responsive transcriptional regulator, AsnC family | -0.310101169 | 0.006653 | 0.011333 |
| AB57_2389 |      | benzoate transporter                                      | -0.11806345  | 0.326471 | 0.386171 |
| AB57_2390 |      | magnesium transporter transmembrane protein               | -0.129975451 | 0.248966 | 0.304319 |
| AB57_2391 | mgtA | magnesium-transporting ATPase MgtA                        | 0.801508651  | 0.000119 | 0.000279 |
| AB57_2392 |      | hypothetical protein                                      | -0.617824835 | 7.20E-05 | 0.000175 |
| AB57_2393 |      | hypothetical protein                                      | -0.587552384 | 9.97E-08 | 3.92E-07 |
| AB57_2394 |      | hypothetical protein                                      | -0.497981162 | 0.013406 | 0.02138  |
| AB57_2395 |      | universal stress protein family                           | -0.219247354 | 0.142388 | 0.182422 |
| AB57_2396 |      | ABC transporter, ATP-binding protein                      | -0.03729219  | 0.750198 | 0.787218 |
| AB57_2397 |      | hypothetical protein                                      | -0.718915818 | 1.93E-11 | 1.43E-10 |
| AB57_2398 |      | hypothetical protein                                      | -0.45813476  | 0.010013 | 0.01639  |
| AB57_2399 |      | hypothetical protein                                      | -1.453743378 | 3.15E-15 | 4.64E-14 |
| AB57_2400 |      | OmpW family protein                                       | -0.987796777 | 2.57E-14 | 3.07E-13 |
| AB57_2401 |      | TonB-dependent siderophore receptor                       | -0.436746606 | 7.25E-05 | 0.000176 |
| AB57_2402 |      | acetyltransferase, gnat family                            | -0.782351464 | 6.66E-11 | 4.43E-10 |
| AB57_2403 |      | hypothetical protein                                      | -0.536763486 | 0.013595 | 0.021642 |
| AB57_2404 |      | hypothetical protein                                      | -1.454989897 | 2.90E-18 | 7.40E-17 |
| AB57_2405 |      | hypothetical protein                                      | -1.384292987 | 7.98E-24 | 4.84E-22 |
| AB57_2406 |      | hypothetical protein                                      | -1.295525078 | 1.11E-18 | 2.94E-17 |
| AB57_2407 |      | mechanosensitive ion channel family protein               | 0.053935283  | 0.616508 | 0.666203 |
| AB57_2408 |      | TonB-dependent siderophore receptor                       | 1.84204063   | 1.69E-13 | 1.76E-12 |
| AB57_2409 |      | transcriptional regulator, TetR family                    | -0.293652839 | 0.09252  | 0.123761 |
| AB57_2410 |      | hypothetical protein                                      | -0.359772349 | 0.008478 | 0.01415  |
| AB57_2411 |      | hypothetical protein                                      | -0.273188993 | 0.226898 | 0.279655 |
| AB57_2412 |      | hypothetical protein                                      | -1.287544356 | 2.37E-06 | 7.52E-06 |
| AB57_2413 |      | hypothetical protein                                      | -0.664478086 | 0.000614 | 0.001265 |
| AB57_2414 |      | transcriptional regulator, AsnC family                    | -0.030767188 | 0.824085 | 0.853854 |
| AB57_2416 |      | chorismate mutase                                         | 0.122035866  | 0.451499 | 0.511653 |
| AB57_2417 |      | oxidoreductase short-chain dehydrogenase/reductase family | -0.306666365 | 0.048572 | 0.068804 |
| AB57_2418 |      | short chain dehydrogenase                                 | -0.377966517 | 0.017757 | 0.027559 |
| AB57_2419 |      | glutathione S-transferase                                 | -0.361451544 | 0.081276 | 0.110276 |
| AB57_2420 |      | hypothetical protein                                      | -0.674780801 | 3.73E-05 | 9.58E-05 |
| AB57_2421 |      | hypothetical protein                                      | -0.605267829 | 4.82E-05 | 0.000121 |
| AB57_2422 |      | hypothetical protein                                      | -0.383454617 | 0.021054 | 0.032311 |
| AB57_2423 |      | hypothetical protein                                      | -0.264905402 | 0.106538 | 0.140481 |
| AB57_2424 | pepN | aminopeptidase N                                          | 0.444466214  | 0.01389  | 0.022076 |
| AB57_2425 |      | hypothetical protein                                      | -1.479361593 | 3.60E-23 | 1.93E-21 |
| AB57_2426 |      | hypothetical protein                                      | -0.036726046 | 0.74253  | 0.780279 |
| AB57_2427 |      | hydroxyethylthiazole kinase                               | -0.116940728 | 0.296833 | 0.354971 |
| AB57_2428 | hpcD | 5-carboxymethyl-2-hydroxyruconate isomerase               | -0.011055938 | 0.912304 | 0.928873 |
| AB57_2429 |      | putative helicase                                         | 0.733808273  | 5.23E-08 | 2.15E-07 |
| AB57_2430 |      | alcohol dehydrogenase, iron-containing                    | -0.127742862 | 0.395306 | 0.45579  |
| AB57_2432 |      | putative transcriptional regulator                        | -0.970672405 | 1.30E-08 | 5.87E-08 |
| AB57_2433 |      | hydrolase, alpha/beta fold family                         | -0.275251714 | 0.025204 | 0.037985 |
| AB57_2434 |      | aldehyde dehydrogenase                                    | -0.039872026 | 0.805717 | 0.838561 |
| AB57_2435 | eat  | ethanolamine permease                                     | -0.01045382  | 0.946997 | 0.957406 |
| AB57_2436 | eutB | ethanolamine ammonia-lyase, large subunit                 | -0.180078051 | 0.138267 | 0.177944 |
| AB57_2437 | eutC | ethanolamine ammonia-lyase, light chain                   | -0.921224438 | 3.13E-08 | 1.33E-07 |
| AB57_2438 |      | glutamine amidotransferase                                | 0.222606756  | 0.070727 | 0.097102 |
| AB57_2439 |      | hypothetical protein                                      | -0.061300944 | 0.671837 | 0.715955 |
| AB57_2440 | glnS | glutaminyl-tRNA synthetase                                | 0.608359953  | 0.001173 | 0.002303 |

|           |      |                                                                         |              |          |          |
|-----------|------|-------------------------------------------------------------------------|--------------|----------|----------|
| AB57_2441 |      | peptidyl-prolyl cis-trans isomerase, cyclophilin type                   | 1.246428954  | 1.49E-14 | 1.87E-13 |
| AB57_2442 | lpxH | UDP-2,3-diacetylglucosamine hydrolase                                   | 0.855098228  | 1.30E-13 | 1.39E-12 |
| AB57_2444 |      | dihydropteridine reductase                                              | -0.222179804 | 0.032643 | 0.048043 |
| AB57_2445 |      | integral membrane protein                                               | -0.523181825 | 1.02E-06 | 3.44E-06 |
| AB57_2446 |      | host factor Hfq                                                         | -0.323266009 | 0.038296 | 0.055524 |
| AB57_2447 | miaA | tRNA delta(2)-isopentenylpyrophosphate transferase                      | -1.001916123 | 2.07E-10 | 1.27E-09 |
| AB57_2448 | mutL | DNA mismatch repair protein MutL                                        | 0.481352649  | 5.73E-05 | 0.000142 |
| AB57_2449 |      | hypothetical protein                                                    | 0.179594335  | 0.106519 | 0.140481 |
| AB57_2450 |      | RNA pseudouridine synthase family protein                               | -0.546601104 | 4.22E-05 | 0.000108 |
| AB57_2451 |      | hypothetical protein                                                    | -0.471318486 | 7.51E-06 | 2.19E-05 |
| AB57_2452 |      | 16S rRNA pseudouridylate 516 synthase                                   | -0.865551711 | 2.03E-10 | 1.25E-09 |
| AB57_2453 |      | putative acetyltransferase                                              | -0.892179604 | 9.94E-11 | 6.41E-10 |
| AB57_2454 |      | hypothetical protein                                                    | -1.224456763 | 5.26E-24 | 3.48E-22 |
| AB57_2455 |      | hypothetical protein                                                    | -0.901952117 | 1.85E-17 | 4.10E-16 |
| AB57_2456 |      | transcriptional regulator, LysR family                                  | -0.533620777 | 1.93E-07 | 7.24E-07 |
| AB57_2457 |      | hypothetical protein                                                    | -0.424305888 | 0.000301 | 0.000653 |
| AB57_2458 |      | hypothetical protein                                                    | -0.601977717 | 8.29E-07 | 2.84E-06 |
| AB57_2459 |      | MFS superfamily permease                                                | 0.619977591  | 7.17E-05 | 0.000174 |
| AB57_2460 |      | ion transport protein                                                   | -0.344692188 | 0.0058   | 0.01001  |
| AB57_2461 |      | hypothetical protein                                                    | -0.470608536 | 0.000547 | 0.001136 |
| AB57_2462 | acnB | bifunctional aconitate hydratase 2/2-methylisocitrate dehydratase       | 0.809692757  | 1.24E-05 | 3.45E-05 |
| AB57_2463 |      | hypothetical protein                                                    | -0.768707282 | 3.48E-12 | 2.98E-11 |
| AB57_2464 |      | hypothetical protein                                                    | -0.25476093  | 0.08291  | 0.112287 |
| AB57_2465 |      | hypothetical protein                                                    | -0.405496996 | 0.002104 | 0.00395  |
| AB57_2466 |      | major facilitator superfamily MFS_1                                     | -0.158915076 | 0.140504 | 0.180133 |
| AB57_2467 |      | ubiquinone biosynthesis protein COQ7                                    | 0.071211259  | 0.485046 | 0.544996 |
| AB57_2468 |      | hypothetical protein                                                    | -0.247072731 | 0.042008 | 0.060431 |
| AB57_2469 |      | glutamine synthetase                                                    | -0.722592472 | 4.45E-09 | 2.17E-08 |
| AB57_2470 | kdpE | two-component system regulatory protein KdpE                            | 0.007461157  | 0.951401 | 0.961536 |
| AB57_2471 | kdpD | two-component system sensor protein KdpD                                | -0.510515533 | 1.15E-06 | 3.86E-06 |
| AB57_2472 | kdpC | K <sup>+</sup> -transporting ATPase, C subunit                          | -0.136131043 | 0.386852 | 0.447018 |
| AB57_2473 | kdpB | potassium-transporting ATPase subunit B                                 | 0.0598417    | 0.596058 | 0.64827  |
| AB57_2474 | kdpA | potassium-transporting ATPase subunit A                                 | 0.044140852  | 0.72897  | 0.768212 |
| AB57_2475 |      | 2-amino-4-hydroxy-6-hydroxymethyldihydropteridine pyrophosphate         | -0.035829656 | 0.785374 | 0.819713 |
| AB57_2476 | folB | dihydroneopterin aldolase                                               | 0.32183      | 0.013934 | 0.022136 |
| AB57_2477 |      | ABC-1 domain protein                                                    | 0.586231954  | 3.07E-05 | 8.04E-05 |
| AB57_2478 |      | molybdopterin biosynthesis protein                                      | 0.426090044  | 2.21E-05 | 5.90E-05 |
| AB57_2479 |      | FMN-binding protein                                                     | 0.472573056  | 1.33E-05 | 3.67E-05 |
| AB57_2480 |      | acyl-CoA ligase                                                         | 2.006034816  | 8.25E-43 | 4.36E-40 |
| AB57_2481 |      | acyl-CoA dehydrogenase                                                  | 2.61695086   | 1.47E-28 | 2.01E-26 |
| AB57_2482 |      | short-chain dehydrogenase/reductase                                     | 3.050454033  | 2.17E-75 | 8.03E-72 |
| AB57_2483 |      | transcriptional regulator, AraC family                                  | -0.570392133 | 0.000179 | 0.000406 |
| AB57_2484 |      | aliphatic sulfonates family ABC transporter, periplasmic ligand-binding | -0.996963974 | 1.69E-05 | 4.58E-05 |
| AB57_2486 |      | aliphatic sulfonates transport permease protein                         | -0.665949057 | 0.002011 | 0.003795 |
| AB57_2487 |      | protein methylase, HemK family                                          | 0.810293921  | 1.10E-09 | 6.01E-09 |
| AB57_2488 | prfA | peptide chain release factor 1                                          | 1.425932619  | 1.33E-15 | 2.09E-14 |
| AB57_2489 |      | ThiJ/PfpI domain protein                                                | -0.464633636 | 0.000632 | 0.001297 |
| AB57_2490 |      | transcriptional regulator, LysR family                                  | -0.530536797 | 0.000117 | 0.000275 |
| AB57_2491 |      | hypothetical protein                                                    | -0.553857451 | 0.000324 | 0.000698 |
| AB57_2492 |      | hypothetical protein                                                    | -0.876860381 | 4.33E-14 | 4.96E-13 |
| AB57_2493 |      | luciferase family monooxygenase                                         | 0.222390885  | 0.064334 | 0.089119 |
| AB57_2494 |      | hypothetical protein                                                    | -1.801616435 | 6.33E-33 | 1.46E-30 |
| AB57_2495 |      | hypothetical protein                                                    | -0.605303126 | 5.58E-05 | 0.000138 |
| AB57_2496 |      | glycosyl transferase, family 2 protein                                  | 0.165856707  | 0.228699 | 0.281686 |
| AB57_2497 |      | polysaccharide deacetylase                                              | 0.065080331  | 0.627952 | 0.675758 |
| AB57_2498 |      | hypothetical protein                                                    | 0.298514237  | 0.024802 | 0.037471 |
| AB57_2499 |      | hypothetical protein                                                    | 0.13405409   | 0.290456 | 0.348359 |
| AB57_2500 |      | hypothetical protein                                                    | -0.170081054 | 0.124053 | 0.161334 |

|           |      |                                                             |              |          |          |
|-----------|------|-------------------------------------------------------------|--------------|----------|----------|
| AB57_2501 | ppsA | phosphoenolpyruvate synthase                                | 0.465449561  | 0.00614  | 0.010537 |
| AB57_2502 |      | RDD family protein                                          | 1.27120249   | 2.29E-23 | 1.30E-21 |
| AB57_2503 |      | cytochrome O ubiquinol oxidase subunit II                   | 0.531142467  | 0.0056   | 0.009691 |
| AB57_2505 | cyoB | cytochrome O ubiquinol oxidase, subunit I                   | 0.296803483  | 0.093673 | 0.125143 |
| AB57_2506 | cyoC | cytochrome O ubiquinol oxidase, subunit III                 | 0.115452438  | 0.504627 | 0.564084 |
| AB57_2507 | cyoD | cytochrome O ubiquinol oxidase subunit IV                   | -0.119153185 | 0.496122 | 0.555417 |
| AB57_2508 | cyoE | protoheme IX farnesyltransferase                            | 0.298226376  | 0.107661 | 0.14181  |
| AB57_2509 | rpsF | 30S ribosomal protein S6                                    | 0.794166336  | 0.000123 | 0.000288 |
| AB57_2510 | rpsR | 30S ribosomal protein S18                                   | 0.564296659  | 0.005816 | 0.010032 |
| AB57_2511 | rplI | 50S ribosomal protein L9                                    | 0.50059197   | 0.009951 | 0.016314 |
| AB57_2512 | dnaB | replicative DNA helicase                                    | 0.455151231  | 0.000543 | 0.001128 |
| AB57_2513 | alr  | alanine racemase                                            | 0.057653363  | 0.559461 | 0.615852 |
| AB57_2514 |      | hypothetical protein                                        | -0.514225307 | 0.001284 | 0.002501 |
| AB57_2515 |      | transglutaminase                                            | -0.872574265 | 1.14E-11 | 8.82E-11 |
| AB57_2516 |      | hypothetical protein                                        | -0.554156706 | 9.30E-06 | 2.64E-05 |
| AB57_2517 |      | hypothetical protein                                        | -0.494852361 | 5.34E-06 | 1.59E-05 |
| AB57_2518 |      | transcriptional factor                                      | -0.295652977 | 0.044056 | 0.062961 |
| AB57_2520 | gidA | tRNA uridine 5-carboxymethylaminomethyl modification enzym  | 2.415531767  | 8.26E-15 | 1.11E-13 |
| AB57_2521 |      | hypothetical protein                                        | -0.780402421 | 5.55E-08 | 2.27E-07 |
| AB57_2522 | prmA | ribosomal protein L11 methyltransferase                     | 1.43325973   | 8.96E-16 | 1.47E-14 |
| AB57_2523 |      | hypothetical protein                                        | 0.226932296  | 0.040397 | 0.058341 |
| AB57_2524 |      | transcriptional regulator, Fis-type                         | 0.734246165  | 1.86E-07 | 7.00E-07 |
| AB57_2525 | purH | bifunctional phosphoribosylaminoimidazolecarboxamide formyl | 1.070765014  | 4.75E-11 | 3.26E-10 |
| AB57_2526 | purD | phosphoribosylamine--glycine ligase                         | 1.148683383  | 2.14E-10 | 1.31E-09 |
| AB57_2527 |      | ABC transporter, methionine-binding protein                 | -0.082593931 | 0.601225 | 0.652547 |
| AB57_2528 | metN | ABC transporter, ATP-binding protein                        | 1.05489797   | 3.31E-10 | 1.95E-09 |
| AB57_2529 | metI | ABC transport system permease protein                       | 0.950928835  | 2.98E-07 | 1.09E-06 |
| AB57_2530 | gloB | hydroxyacylglutathione hydrolase                            | -0.317646704 | 0.004617 | 0.008107 |
| AB57_2531 |      | hypothetical protein                                        | -1.031770312 | 5.40E-11 | 3.68E-10 |
| AB57_2532 |      | C4-dicarboxylate transport protein                          | 0.623803994  | 0.001129 | 0.002223 |
| AB57_2533 |      | transcriptional regulator, TetR family                      | 0.086179579  | 0.572202 | 0.62656  |
| AB57_2534 |      | transporter, major facilitator family                       | -0.511216562 | 1.57E-05 | 4.28E-05 |
| AB57_2535 |      | acetyltransferase, gnat family                              | -0.344586655 | 0.001687 | 0.003227 |
| AB57_2536 |      | L-sorbose dehydrogenase                                     | -1.103564611 | 6.40E-19 | 1.78E-17 |
| AB57_2537 |      | hypothetical protein                                        | -0.42495994  | 9.89E-05 | 0.000235 |
| AB57_2538 |      | aspartate racemase                                          | -0.850003776 | 3.12E-12 | 2.70E-11 |
| AB57_2539 |      | acetyltransferase, gnat family                              | -0.295281015 | 0.093766 | 0.125145 |
| AB57_2540 |      | hypothetical protein                                        | -0.916702841 | 3.34E-05 | 8.66E-05 |
| AB57_2541 |      | hypothetical protein                                        | -0.835332468 | 0.000111 | 0.000261 |
| AB57_2542 |      | two-component system sensor protein                         | -0.460672922 | 6.20E-05 | 0.000152 |
| AB57_2543 |      | two-component system response regulator protein             | -0.773468614 | 5.15E-06 | 1.54E-05 |
| AB57_2544 |      | cyclopropane-fatty-acyl-phospholipid synthase               | -0.3852818   | 0.000672 | 0.001375 |
| AB57_2545 |      | cyclopropane-fatty-acyl-phospholipid synthase               | -1.141911044 | 2.44E-11 | 1.77E-10 |
| AB57_2546 |      | hypothetical protein                                        | -0.993616899 | 7.00E-05 | 0.00017  |
| AB57_2547 |      | dehydrogenase                                               | -0.783855868 | 4.84E-05 | 0.000122 |
| AB57_2548 |      | delta-9 acyl-lipid desaturase 1                             | -1.437037053 | 7.88E-12 | 6.34E-11 |
| AB57_2549 |      | lipocalin family protein                                    | -1.30419923  | 9.45E-07 | 3.22E-06 |
| AB57_2550 |      | two-component heavy metal sensor histidine kinase           | -0.199360314 | 0.078785 | 0.107052 |
| AB57_2551 |      | two-component heavy metal response regulator protein        | -0.438606303 | 0.01109  | 0.017998 |
| AB57_2552 |      | hypothetical protein                                        | -0.286352345 | 0.210338 | 0.260983 |
| AB57_2553 |      | transthyretin                                               | -0.207498292 | 0.279022 | 0.336281 |
| AB57_2554 |      | hypothetical protein                                        | -0.089828492 | 0.429034 | 0.490249 |
| AB57_2555 |      | paraquat-inducible protein B                                | -0.042753192 | 0.677984 | 0.721467 |
| AB57_2556 |      | paraquat-inducible protein A                                | -0.341238485 | 0.004144 | 0.007351 |
| AB57_2557 |      | paraquat-inducible protein A                                | -0.410746209 | 0.009417 | 0.015521 |
| AB57_2559 |      | hypothetical protein                                        | -0.816989107 | 1.60E-12 | 1.44E-11 |
| AB57_2560 |      | transcriptional regulator, TetR family                      | -0.553092726 | 0.030283 | 0.045017 |
| AB57_2561 |      | proline/glycine betaine transporter                         | 0.14848126   | 0.319172 | 0.378263 |

|           |      |                                                            |              |          |          |
|-----------|------|------------------------------------------------------------|--------------|----------|----------|
| AB57_2562 |      | hypothetical protein                                       | -0.683277146 | 6.90E-07 | 2.39E-06 |
| AB57_2563 |      | hypothetical protein                                       | -0.426759898 | 0.000248 | 0.000551 |
| AB57_2564 |      | hypothetical protein                                       | -0.605584214 | 8.33E-08 | 3.33E-07 |
| AB57_2565 |      | CsuE                                                       | 0.189107338  | 0.142766 | 0.182779 |
| AB57_2566 |      | CsuD                                                       | 0.800735982  | 6.22E-05 | 0.000153 |
| AB57_2567 |      | CsuC                                                       | 0.946354299  | 2.46E-08 | 1.06E-07 |
| AB57_2568 |      | CsuB                                                       | 0.687843764  | 0.000528 | 0.0011   |
| AB57_2569 |      | CsuA                                                       | 0.375842071  | 0.083579 | 0.112986 |
| AB57_2570 |      | CsuA/B                                                     | 1.379264361  | 3.52E-09 | 1.75E-08 |
| AB57_2572 |      | hypothetical protein                                       | -0.056355929 | 0.801502 | 0.834898 |
| AB57_2573 |      | transcriptional regulator, GntR family                     | 0.279618133  | 0.080321 | 0.10906  |
| AB57_2574 |      | hypothetical protein                                       | 0.132587424  | 0.238843 | 0.293302 |
| AB57_2575 |      | hypothetical protein                                       | 0.710152569  | 4.36E-07 | 1.56E-06 |
| AB57_2576 |      | oxidoreductase, short chain dehydrogenase/reductase family | 0.087752047  | 0.540055 | 0.59737  |
| AB57_2577 |      | aldo/keto reductase                                        | 0.158672867  | 0.218873 | 0.270304 |
| AB57_2578 |      | transcriptional regulator, LysR family                     | 0.64082893   | 4.29E-09 | 2.11E-08 |
| AB57_2579 |      | cyclase family protein                                     | -0.838451737 | 2.96E-14 | 3.51E-13 |
| AB57_2580 | gltS | sodium/glutamate symporter                                 | 0.349556592  | 0.003779 | 0.006752 |
| AB57_2581 |      | alpha/beta hydrolase fold protein                          | -0.255611657 | 0.039856 | 0.057626 |
| AB57_2582 |      | transcriptional regulator, AraC family                     | -0.56791852  | 0.00264  | 0.004847 |
| AB57_2583 |      | threonine efflux protein                                   | -0.184697774 | 0.112731 | 0.147858 |
| AB57_2584 |      | hypothetical protein                                       | -0.639124663 | 8.10E-05 | 0.000195 |
| AB57_2585 |      | hypothetical protein                                       | -0.328421003 | 0.013577 | 0.021625 |
| AB57_2586 |      | hypothetical protein                                       | -1.080608382 | 3.35E-14 | 3.94E-13 |
| AB57_2587 |      | glycosyl transferase, family 2                             | -0.416703491 | 0.000472 | 0.000992 |
| AB57_2588 |      | methyltransferase type 12                                  | -0.559070875 | 0.000249 | 0.000551 |
| AB57_2589 |      | LmbE-like protein                                          | -0.785056305 | 7.93E-10 | 4.44E-09 |
| AB57_2590 |      | acyl-CoA dehydrogenase                                     | -0.738455366 | 3.49E-05 | 9.01E-05 |
| AB57_2591 |      | hypothetical protein                                       | -1.015241718 | 9.89E-10 | 5.44E-09 |
| AB57_2592 |      | gamma-aminobutyrate permease                               | -0.781122657 | 2.11E-11 | 1.55E-10 |
| AB57_2593 | mmsA | methylmalonate-semialdehyde dehydrogenase                  | -0.352956091 | 0.021313 | 0.032627 |
| AB57_2594 |      | beta alanine--pyruvate transaminase                        | -0.661822905 | 2.22E-10 | 1.35E-09 |
| AB57_2595 |      | transcriptional regulator, LysR family                     | -0.230149453 | 0.028679 | 0.042787 |
| AB57_2596 |      | serine/threonine protein kinase                            | -0.312178462 | 0.055918 | 0.078429 |
| AB57_2597 |      | patatin family phospholipase                               | -0.361117825 | 0.004875 | 0.008532 |
| AB57_2598 |      | hypothetical protein                                       | -0.725738007 | 6.11E-06 | 1.81E-05 |
| AB57_2599 |      | hypothetical protein                                       | -0.448467843 | 0.000196 | 0.000442 |
| AB57_2600 |      | putative DNA-binding/iron metalloprotein/AP endonuclease   | 1.070866397  | 7.05E-13 | 6.77E-12 |
| AB57_2601 | rpsU | 30S ribosomal protein S21                                  | 0.959993589  | 1.40E-07 | 5.36E-07 |
| AB57_2602 |      | GatB/Yqey domain protein                                   | 1.258424166  | 1.27E-11 | 9.71E-11 |
| AB57_2603 |      | hypothetical protein                                       | 0.017953516  | 0.875031 | 0.897592 |
| AB57_2604 |      | 2-ketogluconate reductase                                  | 0.348674423  | 0.001979 | 0.003741 |
| AB57_2605 |      | hypothetical protein                                       | -0.329321352 | 0.002907 | 0.005295 |
| AB57_2606 |      | hypothetical protein                                       | -0.709795936 | 1.75E-08 | 7.67E-08 |
| AB57_2607 | purF | amidophosphoribosyltransferase                             | 0.618777376  | 0.000639 | 0.001312 |
| AB57_2608 |      | colicin V producing membrane protein                       | 0.208585987  | 0.126499 | 0.164284 |
| AB57_2609 | pyrD | dihydroorotate dehydrogenase 2                             | 0.452759822  | 0.000276 | 0.000605 |
| AB57_2610 |      | hypothetical protein                                       | 0.633709811  | 1.60E-07 | 6.09E-07 |
| AB57_2611 |      | hypothetical protein                                       | 0.751424642  | 1.24E-10 | 7.87E-10 |
| AB57_2612 |      | general secretion pathway protein L                        | 0.71651511   | 2.39E-10 | 1.44E-09 |
| AB57_2613 |      | phosphohistidine phosphatase                               | 0.693898647  | 6.45E-11 | 4.31E-10 |
| AB57_2614 |      | NAD(P)H-dependent glycerol-3-phosphate dehydrogenase       | 0.65317558   | 2.72E-09 | 1.38E-08 |
| AB57_2615 |      | nitroreductase                                             | 0.581711479  | 9.67E-09 | 4.43E-08 |
| AB57_2616 |      | hypothetical protein                                       | -1.053720352 | 9.83E-25 | 7.13E-23 |
| AB57_2617 |      | ATP-dependent RNA helicase RhlB                            | 0.514811736  | 0.00022  | 0.000494 |
| AB57_2618 |      | cold-shock domain protein                                  | -0.068602076 | 0.731139 | 0.770058 |
| AB57_2619 |      | hypothetical protein                                       | -0.203333297 | 0.079198 | 0.107574 |
| AB57_2620 | rpoH | RNA polymerase factor sigma-32                             | -0.329553062 | 0.020871 | 0.032042 |

|           |      |                                                                |              |          |          |
|-----------|------|----------------------------------------------------------------|--------------|----------|----------|
| AB57_2621 |      | hypothetical protein                                           | 0.308846657  | 0.002446 | 0.004526 |
| AB57_2622 | thiS | thiamine biosynthesis protein ThiS                             | 1.071495895  | 2.68E-20 | 9.00E-19 |
| AB57_2623 | thiG | thiazole synthase                                              | 0.925005427  | 2.54E-14 | 3.04E-13 |
| AB57_2624 |      | hypothetical protein                                           | 0.097467346  | 0.390193 | 0.450457 |
| AB57_2625 |      | protein YaaA                                                   | 0.112035074  | 0.265146 | 0.321758 |
| AB57_2626 |      | hydrolase                                                      | 0.628069656  | 2.46E-05 | 6.53E-05 |
| AB57_2627 |      | ribonuclease Z                                                 | -0.535820981 | 2.23E-07 | 8.27E-07 |
| AB57_2628 |      | aminoacyl-histidine dipeptidase                                | -0.427615585 | 0.000448 | 0.000948 |
| AB57_2629 |      | hypothetical protein                                           | -1.391736262 | 1.19E-28 | 1.69E-26 |
| AB57_2630 |      | bifunctional cyclohexadienyl dehydrogenase/ 3-phosphoshikimate | 1.125910672  | 9.72E-11 | 6.32E-10 |
| AB57_2631 |      | chorismate mutase                                              | 0.661157028  | 1.92E-07 | 7.19E-07 |
| AB57_2632 |      | alpha/beta hydrolase fold protein                              | -0.284733056 | 0.012648 | 0.020311 |
| AB57_2633 |      | acyl-CoA dehydrogenase                                         | 2.073064416  | 3.73E-57 | 6.90E-54 |
| AB57_2634 |      | C4-dicarboxylate transporter DctA                              | 0.820096218  | 7.96E-08 | 3.19E-07 |
| AB57_2635 |      | hypothetical protein                                           | -0.45245415  | 5.14E-05 | 0.000128 |
| AB57_2636 |      | hypothetical protein                                           | 0.667663856  | 4.65E-11 | 3.21E-10 |
| AB57_2637 |      | inorganic polyphosphate/ATP-NAD kinase                         | -0.138118444 | 0.268712 | 0.325126 |
| AB57_2640 |      | hypothetical protein                                           | 0.159002957  | 0.133131 | 0.171811 |
| AB57_2641 |      | MutT/NUDIX family protein                                      | 0.386177973  | 0.00092  | 0.001846 |
| AB57_2642 |      | hypothetical protein                                           | 0.52565369   | 2.47E-06 | 7.79E-06 |
| AB57_2643 |      | two-component system sensor protein                            | 0.253031781  | 0.01863  | 0.028793 |
| AB57_2644 |      | two-component system response regulator protein                | 0.539009993  | 1.51E-05 | 4.14E-05 |
| AB57_2645 |      | hypothetical protein                                           | 0.709724359  | 1.80E-09 | 9.42E-09 |
| AB57_2646 |      | type II secretion system protein E                             | -0.361518642 | 0.019054 | 0.0294   |
| AB57_2647 |      | hyp                                                            | -0.653388771 | 1.52E-08 | 6.76E-08 |
| AB57_2648 |      | hypothetical protein                                           | 0.101754535  | 0.458203 | 0.518615 |
| AB57_2649 |      | ferredoxin--NADP(+) reductase                                  | 1.061980561  | 1.29E-14 | 1.66E-13 |
| AB57_2650 |      | phenazine biosynthesis protein PhzF family                     | 0.19267704   | 0.114855 | 0.150218 |
| AB57_2651 |      | transcriptional regulator, GntR family                         | -0.385444984 | 0.008866 | 0.014731 |
| AB57_2652 |      | peptidase U32                                                  | 0.52007941   | 2.21E-05 | 5.90E-05 |
| AB57_2653 |      | iron-sulfur cluster-binding protein                            | 0.339090758  | 0.011993 | 0.019335 |
| AB57_2654 |      | small multidrug resistance protein                             | -1.097772728 | 1.06E-17 | 2.46E-16 |
| AB57_2657 |      | histidine transport system permease protein HisM               | 0.005367898  | 0.97691  | 0.981153 |
| AB57_2658 |      | histidine transport system permease protein HisQ               | 0.334759186  | 0.107165 | 0.141207 |
| AB57_2659 |      | histidine-binding periplasmic protein                          | 0.514615436  | 0.008311 | 0.013876 |
| AB57_2660 |      | transcriptional regulator, LysR family                         | 0.233979189  | 0.145163 | 0.185528 |
| AB57_2662 |      | efflux transporter, RND family                                 | -0.029268895 | 0.816253 | 0.847401 |
| AB57_2663 |      | efflux transporter, RND family                                 | 0.282261734  | 0.02778  | 0.04158  |
| AB57_2664 |      | multidrug efflux system outer membrane protein                 | -0.139703058 | 0.200287 | 0.249684 |
| AB57_2665 | glyA | serine hydroxymethyltransferase                                | 1.818751458  | 1.72E-14 | 2.12E-13 |
| AB57_2667 |      | alkaline lipase                                                | -1.608218861 | 1.25E-17 | 2.84E-16 |
| AB57_2668 |      | exodeoxyribonuclease X, putative                               | 0.440786802  | 0.002143 | 0.004011 |
| AB57_2669 |      | hypothetical protein                                           | -0.45256049  | 0.012833 | 0.020563 |
| AB57_2670 |      | hypothetical protein                                           | -0.394171697 | 0.000294 | 0.000641 |
| AB57_2671 |      | lysozyme                                                       | -0.604924608 | 4.88E-05 | 0.000122 |
| AB57_2674 |      | hypothetical protein                                           | -0.470134659 | 0.001001 | 0.001989 |
| AB57_2676 |      | hypothetical protein                                           | 0.582379523  | 0.01264  | 0.020308 |
| AB57_2679 |      | hypothetical protein                                           | -0.79933897  | 1.73E-08 | 7.59E-08 |
| AB57_2680 |      | hypothetical protein                                           | -0.549175347 | 4.24E-05 | 0.000108 |
| AB57_2681 |      | hypothetical protein                                           | -0.182201495 | 0.221971 | 0.273947 |
| AB57_2682 |      | tail tape measure protein                                      | -0.588231225 | 1.09E-07 | 4.27E-07 |
| AB57_2683 |      | hypothetical protein                                           | 0.192095691  | 0.06257  | 0.086903 |
| AB57_2684 |      | phage protein                                                  | -0.149494144 | 0.216743 | 0.267942 |
| AB57_2685 |      | hypothetical protein                                           | -0.095636416 | 0.421602 | 0.482949 |
| AB57_2686 |      | hypothetical protein                                           | -0.239637241 | 0.259836 | 0.316143 |
| AB57_2687 |      | hypothetical protein                                           | -0.030692667 | 0.877988 | 0.900376 |
| AB57_2688 |      | putative tail fiber                                            | -0.662496257 | 4.70E-09 | 2.27E-08 |
| AB57_2689 |      | hypothetical protein                                           | -0.924939659 | 2.04E-06 | 6.55E-06 |



|           |      |                                              |              |          |          |
|-----------|------|----------------------------------------------|--------------|----------|----------|
| AB57_2690 |      | hypothetical protein                         | -0.650402882 | 2.42E-08 | 1.05E-07 |
| AB57_2691 |      | hypothetical protein                         | -0.896413848 | 5.93E-07 | 2.07E-06 |
| AB57_2694 |      | hypothetical protein                         | -0.444531781 | 0.072446 | 0.099205 |
| AB57_2696 |      | hypothetical protein                         | 0.20769959   | 0.293614 | 0.351795 |
| AB57_2697 |      | major capsid protein                         | -0.085324366 | 0.483178 | 0.543392 |
| AB57_2698 |      | hypothetical protein                         | 0.098305694  | 0.657348 | 0.702742 |
| AB57_2700 |      | hypothetical protein                         | -0.351763155 | 0.04092  | 0.059027 |
| AB57_2701 |      | hypothetical protein                         | -0.539953043 | 2.46E-06 | 7.78E-06 |
| AB57_2702 |      | phage putative head morphogenesis protein    | -0.396623482 | 0.022716 | 0.034574 |
| AB57_2703 |      | hypothetical protein                         | -0.276298385 | 0.061485 | 0.085622 |
| AB57_2704 |      | hypothetical protein                         | -0.283831206 | 0.043186 | 0.061862 |
| AB57_2705 |      | phage protein                                | -0.366558005 | 0.05358  | 0.075379 |
| AB57_2706 |      | hypothetical protein                         | -0.164353762 | 0.268035 | 0.324519 |
| AB57_2707 |      | hypothetical protein                         | 0.01554388   | 0.921685 | 0.93585  |
| AB57_2708 |      | hypothetical protein                         | -0.834183013 | 4.85E-08 | 2.00E-07 |
| AB57_2709 |      | hypothetical protein                         | -0.733962388 | 2.17E-13 | 2.23E-12 |
| AB57_2710 |      | hypothetical protein                         | -0.878488154 | 6.95E-18 | 1.68E-16 |
| AB57_2711 |      | hypothetical protein                         | -0.238785007 | 0.038773 | 0.056149 |
| AB57_2712 |      | hypothetical protein                         | -0.816053125 | 1.11E-10 | 7.12E-10 |
| AB57_2713 |      | hypothetical protein                         | -0.874373658 | 0.000181 | 0.00041  |
| AB57_2715 |      | hypothetical protein                         | 0.201035218  | 0.360377 | 0.420517 |
| AB57_2722 |      | replicative DNA helicase                     | -0.249203378 | 0.093772 | 0.125145 |
| AB57_2723 |      | hypothetical protein                         | -0.349412869 | 0.048182 | 0.068305 |
| AB57_2726 |      | hypothetical protein                         | 0.299077482  | 0.064624 | 0.089454 |
| AB57_2727 |      | regulator protein, putative                  | 0.305224266  | 0.147484 | 0.188299 |
| AB57_2728 |      | peptidase S24 S26A and S26B                  | -0.062966929 | 0.570402 | 0.625136 |
| AB57_2729 |      | hypothetical protein                         | 0.541190811  | 4.86E-05 | 0.000122 |
| AB57_2730 |      | hypothetical protein                         | 0.025066848  | 0.815735 | 0.847101 |
| AB57_2731 |      | hypothetical protein                         | 0.003296773  | 0.976823 | 0.981153 |
| AB57_2732 |      | hypothetical protein                         | -0.579541522 | 0.095591 | 0.127131 |
| AB57_2735 |      | hypothetical protein                         | -0.169206315 | 0.430148 | 0.49137  |
| AB57_2736 |      | hypothetical protein                         | -0.355214066 | 0.124313 | 0.161559 |
| AB57_2742 |      | integrase                                    | 0.19998551   | 0.114523 | 0.149941 |
| AB57_2743 |      | hypothetical protein                         | -0.173613941 | 0.362758 | 0.422741 |
| AB57_2744 |      | ABC transporter ATP-binding protein          | 0.636928538  | 1.12E-07 | 4.39E-07 |
| AB57_2745 |      | ABC transporter permease protein             | 1.13910031   | 3.57E-09 | 1.78E-08 |
| AB57_2746 |      | 7-cyano-7-deazaguanine reductase             | 1.188299869  | 5.83E-21 | 2.27E-19 |
| AB57_2747 |      | EsvE2                                        | 1.38017779   | 3.75E-26 | 3.65E-24 |
| AB57_2748 | mrdB | rod shape-determining protein RodA (EsvE3)   | 1.213595193  | 1.45E-12 | 1.32E-11 |
| AB57_2749 | mltB | lytic murein transglycosylase B              | 1.107049191  | 4.85E-17 | 9.87E-16 |
| AB57_2750 |      | rare lipoprotein A                           | 0.512486634  | 0.001219 | 0.002382 |
| AB57_2751 |      | hypothetical protein                         | -0.765625567 | 4.03E-12 | 3.42E-11 |
| AB57_2752 |      | branched-chain amino acid permease           | -0.644548943 | 6.90E-10 | 3.90E-09 |
| AB57_2753 |      | transcriptional regulator, AraC family       | -1.136760316 | 1.77E-16 | 3.30E-15 |
| AB57_2754 |      | hypothetical protein                         | 0.445365065  | 0.003837 | 0.006848 |
| AB57_2755 | tsf  | elongation factor Ts                         | 1.871218838  | 2.40E-19 | 7.23E-18 |
| AB57_2756 | rpsB | 30S ribosomal protein S2                     | 0.395083868  | 0.032164 | 0.047413 |
| AB57_2757 | map  | methionine aminopeptidase, type I            | 1.072930118  | 1.01E-12 | 9.57E-12 |
| AB57_2758 |      | OmpW family protein                          | 0.271776373  | 0.035661 | 0.052071 |
| AB57_2759 |      | MFS transporter, NNP family                  | -0.444479326 | 0.002372 | 0.004393 |
| AB57_2760 |      | major facilitator family transporter         | -0.859781717 | 5.66E-15 | 8.00E-14 |
| AB57_2762 |      | soluble pyridine nucleotide transhydrogenase | 0.542481819  | 0.000744 | 0.001513 |
| AB57_2763 | lipA | lipoyl synthase                              | 0.583026066  | 0.000491 | 0.001029 |
| AB57_2764 |      | acyl-CoA dehydrogenase                       | -0.495612628 | 1.42E-05 | 3.92E-05 |
| AB57_2765 |      | 4-carboxymuconolactone decarboxylase         | 0.84880035   | 2.84E-10 | 1.69E-09 |
| AB57_2766 |      | hypothetical protein                         | 0.300261376  | 0.051806 | 0.073077 |
| AB57_2767 | ahcY | S-adenosyl-L-homocysteine hydrolase          | 0.848726061  | 3.34E-06 | 1.03E-05 |
| AB57_2768 | metF | 5,10-methylenetetrahydrofolate reductase     | 0.606848261  | 0.000141 | 0.000327 |

|           |      |                                                                  |              |          |          |
|-----------|------|------------------------------------------------------------------|--------------|----------|----------|
| AB57_2769 |      | hypothetical protein                                             | 0.432851005  | 4.28E-05 | 0.000109 |
| AB57_2770 |      | transposase subunit                                              | -0.833936216 | 7.20E-08 | 2.90E-07 |
| AB57_2771 |      | transposase 1                                                    | -0.487818983 | 0.007818 | 0.013143 |
| AB57_2772 |      | sensory box protein                                              | -0.493063017 | 0.000302 | 0.000656 |
| AB57_2773 |      | malic enzyme                                                     | 0.942256293  | 2.49E-07 | 9.16E-07 |
| AB57_2774 |      | multifunctional tRNA nucleotidyl transferase/2'3'-cyclic phospho | -0.033233187 | 0.796439 | 0.830794 |
| AB57_2775 |      | peptidase S1 and S6                                              | 0.393823292  | 0.000171 | 0.000388 |
| AB57_2776 |      | hypothetical protein                                             | 0.725410569  | 1.13E-12 | 1.05E-11 |
| AB57_2777 |      | superoxide dismutase (Fe)                                        | 0.806947553  | 3.64E-07 | 1.31E-06 |
| AB57_2778 |      | hypothetical protein                                             | -0.035575336 | 0.832913 | 0.861128 |
| AB57_2779 |      | hypothetical protein                                             | 0.354754429  | 0.105321 | 0.139174 |
| AB57_2780 |      | hypothetical protein                                             | -0.494258748 | 0.000141 | 0.000326 |
| AB57_2781 | ubiA | 4-hydroxybenzoate octaprenyltransferase                          | 0.116842607  | 0.281174 | 0.338653 |
| AB57_2782 |      | chorismate lyase                                                 | -0.229497916 | 0.031039 | 0.04603  |
| AB57_2783 | glnA | glutamine synthetase, type I                                     | 1.613102409  | 7.28E-13 | 6.96E-12 |
| AB57_2784 |      | dipeptide/tripeptide permease                                    | -0.251647224 | 0.012925 | 0.020694 |
| AB57_2785 |      | peptidase M24                                                    | 0.228221395  | 0.071037 | 0.097455 |
| AB57_2786 |      | para-aminobenzoate/antranilate synthase glutamine amidotra       | 0.613482997  | 1.69E-09 | 8.90E-09 |
| AB57_2787 |      | aminopeptidase N                                                 | -0.464204262 | 1.85E-05 | 5.00E-05 |
| AB57_2788 |      | TonB-dependent receptor                                          | -0.478235821 | 0.00296  | 0.005385 |
| AB57_2789 | trpD | anthranilate phosphoribosyltransferase                           | 0.719270363  | 1.23E-07 | 4.76E-07 |
| AB57_2790 | trpC | indole-3-glycerol-phosphate synthase                             | 0.884182218  | 2.01E-08 | 8.77E-08 |
| AB57_2791 |      | Smr protein/MutS2                                                | 0.512521507  | 0.000301 | 0.000653 |
| AB57_2792 | xdhC | xanthine dehydrogenase accessory protein XdhC                    | -0.320381656 | 0.046855 | 0.066525 |
| AB57_2793 | xdhB | xanthine dehydrogenase, molybdopterin binding subunit            | -0.407869383 | 0.000219 | 0.000492 |
| AB57_2794 | xdhA | xanthine dehydrogenase, small subunit                            | -0.791353297 | 1.30E-07 | 5.00E-07 |
| AB57_2795 | folE | GTP cyclohydrolase I                                             | 0.941710385  | 9.60E-14 | 1.05E-12 |
| AB57_2796 | ampC | beta-lactamase                                                   | 1.332697858  | 1.44E-11 | 1.09E-10 |
| AB57_2797 |      | hypothetical protein                                             | 0.421739017  | 0.000482 | 0.001013 |
| AB57_2798 |      | hypothetical protein                                             | -0.513358208 | 0.000562 | 0.001162 |
| AB57_2799 |      | hypothetical protein                                             | 1.290363373  | 2.97E-12 | 2.58E-11 |
| AB57_2800 | hemE | uroporphyrinogen decarboxylase                                   | 1.851552992  | 4.61E-27 | 5.50E-25 |
| AB57_2801 |      | ErfK/YbiS/YcfS/YnhG family                                       | 0.383245782  | 0.011192 | 0.018123 |
| AB57_2802 |      | probable acinetobactin biosynthesis protein                      | -0.754419123 | 1.62E-11 | 1.22E-10 |
| AB57_2803 |      | probable acinetobactin biosynthesis protein                      | -0.385071831 | 0.091855 | 0.123088 |
| AB57_2804 |      | probable acinetobactin biosynthesis protein                      | 0.036493646  | 0.812646 | 0.844367 |
| AB57_2805 |      | probable ABC transporter                                         | 0.166864398  | 0.29835  | 0.35667  |
| AB57_2806 |      | probable ABC transporter                                         | -0.017590723 | 0.905551 | 0.923013 |
| AB57_2808 |      | histidine decarboxylase                                          | -0.239869583 | 0.208487 | 0.258947 |
| AB57_2809 |      | 2,3 dihydro-2,3 dihydroxybenzoate synthase                       | 0.070805198  | 0.725154 | 0.765062 |
| AB57_2810 |      | enterobactin synthase subunit E                                  | -0.067394551 | 0.664111 | 0.708742 |
| AB57_2811 | basD | nonribosomal peptide synthetase BasD                             | -0.357077117 | 0.002334 | 0.004333 |
| AB57_2812 | basC | nonribosomal peptide synthetase BasC                             | -0.460716221 | 0.001995 | 0.00377  |
| AB57_2813 | bauA | ferric acinetobactin receptor                                    | -0.747908748 | 5.25E-12 | 4.34E-11 |
| AB57_2814 | bauB | ferric acinetobactin transport system periplasmic binding protei | -0.148409072 | 0.280679 | 0.338167 |
| AB57_2815 | bauE | ferric acinetobactin transport system ATP-binding protein        | 0.308599911  | 0.082714 | 0.112062 |
| AB57_2816 | bauC | ferric acinetobactin transport system permease                   | -0.46815724  | 0.058632 | 0.081925 |
| AB57_2817 | bauD | ferric acinetobactin transport system permease                   | -0.226279462 | 0.313816 | 0.372626 |
| AB57_2819 |      | non-ribosomal peptide synthetase                                 | -0.608596695 | 9.78E-06 | 2.77E-05 |
| AB57_2820 |      | non-ribosomal peptide synthetase                                 | -0.288347387 | 0.106283 | 0.140317 |
| AB57_2821 |      | hypothetical protein                                             | 0.473183466  | 0.008233 | 0.013765 |
| AB57_2822 |      | siderophore-interacting protein                                  | -0.094758388 | 0.571731 | 0.62623  |
| AB57_2823 |      | threonine ammonia-lyase                                          | -0.227842163 | 0.349052 | 0.409218 |
| AB57_2825 |      | pirin domain protein                                             | -0.696130353 | 1.46E-10 | 9.14E-10 |
| AB57_2826 |      | hypothetical protein                                             | -1.708939718 | 3.69E-22 | 1.78E-20 |
| AB57_2827 |      | transcriptional regulator, TetR family                           | -0.52673636  | 0.010384 | 0.016934 |
| AB57_2828 |      | hypothetical protein                                             | -0.257771801 | 0.062103 | 0.086318 |
| AB57_2829 |      | hypothetical protein                                             | -0.351788133 | 0.034497 | 0.050471 |

|           |      |                                                                    |              |          |          |
|-----------|------|--------------------------------------------------------------------|--------------|----------|----------|
| AB57_2831 |      | transcriptional regulator, TetR family                             | -1.09785311  | 2.06E-14 | 2.50E-13 |
| AB57_2832 |      | hypothetical protein                                               | -0.197655178 | 0.230555 | 0.283783 |
| AB57_2833 |      | hypothetical protein                                               | -0.528348551 | 0.002595 | 0.004777 |
| AB57_2834 |      | hypothetical protein                                               | -0.32619476  | 0.061723 | 0.085894 |
| AB57_2835 |      | hypothetical protein                                               | -0.000904441 | 0.996094 | 0.996633 |
| AB57_2836 |      | hypothetical protein                                               | 0.233368927  | 0.072417 | 0.099201 |
| AB57_2837 |      | hypothetical protein                                               | 0.29325248   | 0.033388 | 0.049042 |
| AB57_2838 |      | FAD dependent oxidoreductase                                       | 0.082110707  | 0.514155 | 0.572832 |
| AB57_2839 |      | rubredoxin-NAD(+) reductase                                        | 0.22737976   | 0.040832 | 0.058923 |
| AB57_2840 |      | aldehyde dehydrogenase                                             | -0.182661027 | 0.114856 | 0.150218 |
| AB57_2841 |      | rieske 2Fe-2S family protein                                       | -0.423233454 | 0.000656 | 0.001343 |
| AB57_2842 |      | glycine betaine transporter OpuD                                   | -0.726427744 | 4.24E-11 | 2.96E-10 |
| AB57_2843 |      | glycine betaine transporter OpuD                                   | -0.457057248 | 5.70E-05 | 0.000141 |
| AB57_2844 |      | proline dipeptidase                                                | -0.536255302 | 5.35E-07 | 1.88E-06 |
| AB57_2845 |      | glycine cleavage system transcriptional activator                  | -0.367506004 | 0.00052  | 0.001084 |
| AB57_2846 |      | hypothetical protein                                               | -0.506900706 | 1.16E-05 | 3.24E-05 |
| AB57_2847 |      | carbon starvation protein A                                        | -0.843357109 | 3.17E-09 | 1.59E-08 |
| AB57_2848 | efp  | elongation factor P                                                | 1.343804621  | 1.12E-13 | 1.21E-12 |
| AB57_2849 |      | hypothetical protein                                               | 0.18829667   | 0.067997 | 0.093771 |
| AB57_2850 |      | hypothetical protein                                               | -0.216329428 | 0.045658 | 0.064975 |
| AB57_2853 | rpmE | 50S ribosomal protein L31                                          | 0.919950341  | 9.46E-08 | 3.74E-07 |
| AB57_2854 |      | sodium/bile acid symporter family protein                          | 0.333616257  | 0.00075  | 0.001523 |
| AB57_2855 | gloA | glyoxalase I                                                       | 0.658598827  | 2.25E-08 | 9.79E-08 |
| AB57_2856 |      | major facilitator superfamily MFS_1                                | 0.356489723  | 0.004928 | 0.008617 |
| AB57_2857 |      | peptidase S16, lon domain protein                                  | -0.218936363 | 0.113927 | 0.149215 |
| AB57_2858 |      | transcriptional regulator, LysR family                             | 0.292682132  | 0.012824 | 0.020559 |
| AB57_2859 |      | peptidase M23B                                                     | 0.284903712  | 0.010511 | 0.017118 |
| AB57_2860 | surE | 5'/3'-nucleotidase SurE                                            | 0.537438279  | 9.75E-05 | 0.000232 |
| AB57_2861 |      | hypothetical protein                                               | -0.806781862 | 9.43E-08 | 3.74E-07 |
| AB57_2862 |      | hypothetical protein                                               | -0.797043511 | 9.07E-10 | 5.02E-09 |
| AB57_2863 |      | penicillin-binding protein 6 (D-alanyl-D-alanine carboxypeptidase) | 1.406141449  | 4.40E-16 | 7.61E-15 |
| AB57_2864 |      | putative transferase                                               | 0.237931972  | 0.049771 | 0.070448 |
| AB57_2865 |      | hydrolase, NUDIX family                                            | 0.805278637  | 4.09E-12 | 3.46E-11 |
| AB57_2866 | trmU | tRNA-specific 2-thiouridylase MnmA                                 | 1.294611153  | 8.68E-16 | 1.43E-14 |
| AB57_2867 |      | hypothetical protein                                               | 0.366300885  | 0.003549 | 0.006378 |
| AB57_2868 | purB | adenylosuccinate lyase                                             | 1.688879577  | 1.78E-15 | 2.73E-14 |
| AB57_2869 |      | hypothetical protein                                               | -0.604498388 | 5.14E-07 | 1.82E-06 |
| AB57_2870 |      | hypothetical protein                                               | 0.3135724    | 0.009294 | 0.015331 |
| AB57_2871 |      | putative periplasmic protease                                      | -0.376239325 | 0.01022  | 0.016695 |
| AB57_2872 | pstB | phosphate transporter ATP-binding protein                          | 0.371886353  | 0.006598 | 0.011255 |
| AB57_2873 | pstA | phosphate ABC transporter, permease protein                        | 1.611295194  | 1.42E-24 | 9.70E-23 |
| AB57_2874 | pstC | phosphate ABC transporter, permease protein (EsvD)                 | 1.490587985  | 2.44E-21 | 1.03E-19 |
| AB57_2875 |      | phosphate ABC transporter, substrate-binding protein               | 2.287685487  | 6.48E-20 | 2.09E-18 |
| AB57_2876 | aroP | aromatic amino acid transport protein                              | -0.918720471 | 1.55E-09 | 8.20E-09 |
| AB57_2877 |      | indole-3-pyruvate decarboxylase                                    | -0.667365745 | 3.12E-05 | 8.15E-05 |
| AB57_2878 |      | transcriptional regulator, AsnC family                             | -0.114341386 | 0.302037 | 0.360758 |
| AB57_2879 |      | aldehyde dehydrogenase                                             | -0.693059244 | 1.30E-05 | 3.59E-05 |
| AB57_2880 |      | diaminobutyrate decarboxylase                                      | 0.769062801  | 7.90E-05 | 0.000191 |
| AB57_2881 |      | diaminobutyrate--2-oxoglutarate aminotransferase                   | 0.585924437  | 0.001323 | 0.002566 |
| AB57_2882 |      | hypothetical protein                                               | -0.857192645 | 1.97E-14 | 2.40E-13 |
| AB57_2883 |      | transcriptional regulator, TetR family                             | -0.464916802 | 2.43E-05 | 6.46E-05 |
| AB57_2884 |      | hypothetical protein                                               | -0.235613048 | 0.060763 | 0.084776 |
| AB57_2885 |      | fatty acid desaturase                                              | 1.160614663  | 2.72E-10 | 1.63E-09 |
| AB57_2886 |      | oxidoreductase                                                     | 1.649265964  | 1.08E-17 | 2.47E-16 |
| AB57_2890 |      | transcriptional regulator, TetR family                             | 0.401876354  | 0.000249 | 0.000551 |
| AB57_2891 |      | hypothetical protein                                               | -0.681476014 | 1.97E-07 | 7.35E-07 |
| AB57_2892 |      | ATP-dependent helicase HepA                                        | 1.214922543  | 1.14E-08 | 5.15E-08 |
| AB57_2893 |      | pseudouridine synthase A                                           | 1.201467495  | 8.82E-15 | 1.17E-13 |

|           |      |                                                         |              |          |          |
|-----------|------|---------------------------------------------------------|--------------|----------|----------|
| AB57_2894 |      | hypothetical protein                                    | 0.057128539  | 0.611657 | 0.661754 |
| AB57_2895 | hemL | glutamate-1-semialdehyde aminotransferase               | 0.891817565  | 5.88E-11 | 3.97E-10 |
| AB57_2896 | thiE | thiamine-phosphate pyrophosphorylase                    | 0.914219062  | 5.73E-15 | 8.06E-14 |
| AB57_2900 |      | hypothetical protein                                    | -0.43338474  | 0.022085 | 0.033753 |
| AB57_2901 |      | crispr-associated protein, Csy4 family                  | 0.024497575  | 0.817884 | 0.848855 |
| AB57_2902 |      | crispr-associated protein, Csy3 family                  | 0.467817435  | 0.00029  | 0.000633 |
| AB57_2903 |      | crispr-associated protein, Csy2 family protein          | 0.423639462  | 0.000362 | 0.000775 |
| AB57_2904 |      | crispr-associated protein, Csy1 family                  | 0.174142129  | 0.095481 | 0.127033 |
| AB57_2905 |      | crispr-associated helicase Cas3                         | -0.193139843 | 0.070492 | 0.096851 |
| AB57_2906 | cas  | crispr-associated protein Cas1                          | 0.16950607   | 0.11631  | 0.151959 |
| AB57_2907 |      | hypothetical protein                                    | -1.004783403 | 1.16E-13 | 1.25E-12 |
| AB57_2908 |      | adenylate cyclase                                       | -0.712829903 | 3.60E-06 | 1.10E-05 |
| AB57_2909 |      | hypothetical protein                                    | -0.156759287 | 0.210102 | 0.260777 |
| AB57_2910 |      | hypothetical protein                                    | 0.535668856  | 8.23E-06 | 2.37E-05 |
| AB57_2911 |      | protease                                                | 0.706964543  | 2.39E-05 | 6.37E-05 |
| AB57_2912 |      | phenazine biosynthesis protein                          | 0.095644638  | 0.464867 | 0.525353 |
| AB57_2913 |      | transport protein                                       | 0.442091042  | 0.00109  | 0.002149 |
| AB57_2914 |      | transcriptional regulator, LysR family                  | -0.473013253 | 0.000117 | 0.000275 |
| AB57_2915 |      | major facilitator family transporter                    | -0.764858086 | 0.008155 | 0.01364  |
| AB57_2917 |      | hypothetical protein                                    | -0.083382727 | 0.740876 | 0.778983 |
| AB57_2919 | icd  | isocitrate dehydrogenase, NADP-dependent                | 0.029492454  | 0.800038 | 0.833607 |
| AB57_2920 |      | pseudouridine synthase, Rsu                             | 0.925174815  | 6.04E-12 | 4.94E-11 |
| AB57_2921 |      | isocitrate dehydrogenase, NADP-dependent                | 1.262659616  | 9.98E-10 | 5.49E-09 |
| AB57_2922 |      | peptidase M61                                           | 0.679526585  | 1.80E-05 | 4.87E-05 |
| AB57_2923 |      | D-ala-D-ala-carboxypeptidase penicillin-binding protein | 1.636352716  | 7.49E-18 | 1.80E-16 |
| AB57_2924 |      | NADH dehydrogenase                                      | -0.358915957 | 0.00101  | 0.002004 |
| AB57_2925 |      | peptidyl-prolyl cis-trans isomerase, FKBP-type          | 1.208667042  | 1.96E-11 | 1.45E-10 |
| AB57_2926 |      | deoxyribodipyrimidine photo-lyase                       | -0.999918411 | 8.26E-10 | 4.61E-09 |
| AB57_2927 |      | deoxyribodipyrimidine photo-lyase                       | -0.254676462 | 0.144626 | 0.184906 |
| AB57_2928 |      | hypothetical protein                                    | -0.585537433 | 2.76E-05 | 7.26E-05 |
| AB57_2929 |      | hypothetical protein                                    | -0.761841332 | 1.46E-10 | 9.12E-10 |
| AB57_2930 |      | glycosyltransferase                                     | -0.444785389 | 7.75E-05 | 0.000187 |
| AB57_2931 |      | hypothetical protein                                    | -0.286959611 | 0.006777 | 0.011514 |
| AB57_2932 |      | hypothetical protein                                    | -0.862908183 | 3.76E-10 | 2.21E-09 |
| AB57_2933 |      | UDP-N-acetylglucosamine 2-epimerase                     | -0.590374806 | 4.32E-09 | 2.12E-08 |
| AB57_2934 |      | hypothetical protein                                    | -0.83801669  | 9.73E-15 | 1.29E-13 |
| AB57_2935 |      | hypothetical protein                                    | -0.162145469 | 0.243184 | 0.29794  |
| AB57_2936 |      | 2-nitropropane dioxygenase                              | -0.527309581 | 4.51E-05 | 0.000114 |
| AB57_2937 |      | tRNA-dihydrouridine synthase B                          | 0.120968735  | 0.288136 | 0.346026 |
| AB57_2938 |      | hypothetical protein                                    | 0.711136515  | 7.35E-11 | 4.87E-10 |
| AB57_2939 |      | phosphoserine phosphatase                               | -0.068736142 | 0.520381 | 0.579245 |
| AB57_2940 | proB | gamma-glutamyl kinase                                   | 0.737546027  | 0.0001   | 0.000238 |
| AB57_2941 |      | GTPase ObgE                                             | 0.862340841  | 9.81E-06 | 2.78E-05 |
| AB57_2942 |      | hypothetical protein                                    | -0.250444486 | 0.03392  | 0.049727 |
| AB57_2943 |      | hypothetical protein                                    | -0.23814413  | 0.108221 | 0.142446 |
| AB57_2944 |      | glyceraldehyde-3-phosphate dehydrogenase                | 2.203003809  | 3.91E-16 | 6.92E-15 |
| AB57_2945 | rarD | RarD protein                                            | -0.127383944 | 0.225342 | 0.277829 |
| AB57_2946 |      | outer membrane lipoprotein Blc                          | -0.492697224 | 5.48E-06 | 1.63E-05 |
| AB57_2947 | uvrB | excinuclease ABC subunit B                              | -0.216215232 | 0.176592 | 0.222772 |
| AB57_2948 |      | hypothetical protein                                    | -0.761728457 | 6.42E-10 | 3.65E-09 |
| AB57_2949 |      | GGDEF family protein                                    | -0.002564024 | 0.980417 | 0.983874 |
| AB57_2950 |      | hypothetical protein                                    | 0.43095353   | 0.000123 | 0.000289 |
| AB57_2951 |      | aspartate aminotransferase A                            | 1.892752859  | 5.08E-18 | 1.25E-16 |
| AB57_2952 |      | hypothetical protein                                    | -0.718439371 | 4.94E-09 | 2.37E-08 |
| AB57_2953 |      | thioesterase superfamily protein                        | -0.001363615 | 0.991854 | 0.992927 |
| AB57_2954 |      | hypothetical protein                                    | -0.726904243 | 5.05E-08 | 2.07E-07 |
| AB57_2955 |      | short-chain dehydrogenase/reductase                     | -0.727356412 | 1.62E-08 | 7.16E-08 |
| AB57_2956 |      | tRNA--hydroxylase                                       | 1.631673094  | 3.36E-19 | 1.00E-17 |

|           |      |                                                                  |              |          |          |
|-----------|------|------------------------------------------------------------------|--------------|----------|----------|
| AB57_2957 | pdxJ | pyridoxine 5'-phosphate synthase                                 | 1.806390963  | 3.90E-32 | 8.02E-30 |
| AB57_2958 | recO | DNA repair protein RecO                                          | 1.008524084  | 1.10E-10 | 7.04E-10 |
| AB57_2959 |      | hypothetical protein                                             | 0.759793617  | 7.80E-07 | 2.68E-06 |
| AB57_2960 | era  | GTP-binding protein Era                                          | 1.217494263  | 5.47E-12 | 4.51E-11 |
| AB57_2961 | rnc  | ribonuclease III                                                 | 0.827829368  | 4.47E-12 | 3.75E-11 |
| AB57_2962 |      | hypothetical protein                                             | 0.820816859  | 4.15E-11 | 2.90E-10 |
| AB57_2963 | lepB | signal peptidase I                                               | 0.92912916   | 1.85E-10 | 1.14E-09 |
| AB57_2964 | lepA | GTP-binding protein LepA                                         | 1.510997608  | 3.48E-10 | 2.05E-09 |
| AB57_2965 |      | thioesterase superfamily                                         | 0.086367976  | 0.516866 | 0.575678 |
| AB57_2966 |      | peptidase S1C, Do                                                | -0.285834298 | 0.022049 | 0.033711 |
| AB57_2967 | nadB | L-aspartate oxidase                                              | 0.14510264   | 0.212407 | 0.263462 |
| AB57_2968 |      | thioesterase family protein                                      | -0.136525207 | 0.234918 | 0.28877  |
| AB57_2969 | tmk  | thymidylate kinase                                               | 0.457591853  | 6.39E-05 | 0.000156 |
| AB57_2970 |      | aminodeoxychorismate lyase                                       | 0.402791271  | 0.000455 | 0.000959 |
| AB57_2971 | pabC | aminodeoxychorismate lyase                                       | -0.397960314 | 0.000446 | 0.000944 |
| AB57_2972 |      | thiosulfate-binding protein                                      | -2.320274994 | 7.16E-07 | 2.47E-06 |
| AB57_2974 |      | alpha/beta hydrolase fold protein                                | -1.809312963 | 0.001344 | 0.002604 |
| AB57_2975 | cysT | sulfate ABC transporter, permease protein CysT                   | -1.045088798 | 0.021162 | 0.032435 |
| AB57_2976 | cysW | sulfate ABC transporter, permease protein CysW                   | -1.391631652 | 2.76E-13 | 2.81E-12 |
| AB57_2977 | cysA | sulfate ABC transporter, ATP-binding protein CysA                | 0.614528756  | 6.85E-05 | 0.000167 |
| AB57_2978 |      | transcriptional regulator CysB-like protein                      | 1.01331559   | 1.38E-10 | 8.70E-10 |
| AB57_2979 |      | outer membrane protein CarO                                      | -0.30234762  | 0.056065 | 0.078605 |
| AB57_2980 | dapD | 2,3,4,5-tetrahydropyridine-2,6-carboxylate N-succinyltransferase | 2.271470155  | 1.13E-23 | 6.75E-22 |
| AB57_2981 |      | radical SAM domain protein                                       | 2.310510033  | 1.40E-20 | 5.08E-19 |
| AB57_2982 |      | ExsB protein                                                     | 1.305181938  | 4.46E-11 | 3.09E-10 |
| AB57_2983 |      | hypothetical protein                                             | 0.588943541  | 0.000415 | 0.000884 |
| AB57_2984 |      | hypothetical protein                                             | 0.516905766  | 0.000307 | 0.000664 |
| AB57_2985 |      | bacterioferritin comigratory protein                             | 0.274170325  | 0.0228   | 0.034687 |
| AB57_2986 |      | hypothetical protein                                             | -0.435004323 | 0.000203 | 0.000459 |
| AB57_2987 |      | nicotinamide-nucleotide adenylyltransferase                      | 0.27178662   | 0.016812 | 0.02618  |
| AB57_2988 |      | hypothetical protein                                             | -0.84801649  | 5.25E-09 | 2.50E-08 |
| AB57_2989 |      | enoyl-CoA hydratase/isomerase                                    | -0.605403696 | 1.16E-05 | 3.25E-05 |
| AB57_2991 |      | MFS family drug transporter                                      | -0.884317308 | 1.64E-09 | 8.67E-09 |
| AB57_2992 | purL | phosphoribosylformylglycinamide synthase                         | 1.840511905  | 1.21E-15 | 1.94E-14 |
| AB57_2993 |      | deoxyguanosinetriphosphate triphosphohydrolase-like protein      | 0.227756612  | 0.027225 | 0.040833 |
| AB57_2994 | ruvA | Holliday junction DNA helicase RuvA                              | 1.139998243  | 1.75E-20 | 6.30E-19 |
| AB57_2995 | ruvB | Holliday junction DNA helicase RuvB                              | 1.112562721  | 1.32E-15 | 2.08E-14 |
| AB57_2996 |      | Peptidase M20D, amidohydrolase                                   | -1.246999178 | 4.23E-21 | 1.74E-19 |
| AB57_2997 | ybgC | tol-pal system-associated acyl-CoA thioesterase                  | -0.596001101 | 8.96E-08 | 3.56E-07 |
| AB57_2998 | tolQ | protein TolQ                                                     | 0.091704103  | 0.460966 | 0.521423 |
| AB57_2999 | tolR | protein TolR                                                     | 0.433418032  | 5.73E-05 | 0.000142 |
| AB57_3002 | tolB | translocation protein TolB                                       | 0.066475686  | 0.591698 | 0.644285 |
| AB57_3003 |      | peptidoglycan-associated lipoprotein                             | 0.034648487  | 0.799534 | 0.833317 |
| AB57_3004 |      | hypothetical protein                                             | -0.638251593 | 0.000966 | 0.001927 |
| AB57_3005 | fbp  | fructose-1,6-bisphosphatase                                      | 2.454842175  | 7.73E-29 | 1.14E-26 |
| AB57_3006 |      | tRNA/rRNA methyltransferase                                      | 1.156290886  | 1.56E-10 | 9.75E-10 |
| AB57_3007 |      | RNA polymerase factor sigma-70                                   | -0.664039978 | 1.22E-06 | 4.07E-06 |
| AB57_3008 |      | hypothetical protein                                             | -0.384841856 | 0.000559 | 0.001157 |
| AB57_3009 |      | hypothetical protein                                             | -0.039648516 | 0.693983 | 0.736585 |
| AB57_3010 |      | hypothetical protein                                             | -0.485842656 | 0.002067 | 0.003886 |
| AB57_3011 |      | hypothetical protein                                             | -0.11692699  | 0.462085 | 0.522528 |
| AB57_3012 |      | DnaA family protein                                              | -0.428882999 | 0.000676 | 0.001384 |
| AB57_3013 |      | permease                                                         | -0.100456476 | 0.448261 | 0.508295 |
| AB57_3014 | purM | phosphoribosylaminoimidazole synthetase                          | 1.535769846  | 1.08E-14 | 1.39E-13 |
| AB57_3015 | purN | phosphoribosylglycinamide formyltransferase                      | 1.731874376  | 5.69E-24 | 3.63E-22 |
| AB57_3016 |      | hydrolase                                                        | 0.655985938  | 7.38E-09 | 3.46E-08 |
| AB57_3017 |      | signal peptide peptidase SppA, 36K type                          | 0.478759667  | 0.000978 | 0.001945 |
| AB57_3019 |      | lipid A biosynthesis acyltransferase                             | 0.171188676  | 0.091883 | 0.123088 |

|           |      |                                                             |              |          |          |
|-----------|------|-------------------------------------------------------------|--------------|----------|----------|
| AB57_3021 | lolD | lipoprotein releasing system, ATP-binding protein           | 0.754523439  | 3.80E-07 | 1.36E-06 |
| AB57_3022 |      | lipoprotein-releasing system transmembrane protein LolE     | 1.038764267  | 6.59E-11 | 4.40E-10 |
| AB57_3023 |      | hypothetical protein                                        | 0.200318989  | 0.106338 | 0.140317 |
| AB57_3024 |      | hypothetical protein                                        | 0.162377471  | 0.14388  | 0.184079 |
| AB57_3025 |      | hypothetical protein                                        | -0.361597859 | 0.001118 | 0.002203 |
| AB57_3027 | serC | phosphoserine aminotransferase                              | 1.329869     | 4.06E-19 | 1.19E-17 |
| AB57_3029 |      | putative RND family drug transporter                        | -0.331112431 | 0.046652 | 0.066288 |
| AB57_3030 |      | putative RND family drug transporter                        | -0.263597027 | 0.014568 | 0.023015 |
| AB57_3031 |      | hypothetical protein                                        | -0.157327163 | 0.157186 | 0.19979  |
| AB57_3032 |      | ABC-2 type transporter family                               | -0.355795779 | 0.003159 | 0.005729 |
| AB57_3033 |      | hypothetical protein                                        | -0.775522756 | 4.90E-05 | 0.000123 |
| AB57_3034 |      | glycosyltransferase                                         | -0.428227487 | 0.012138 | 0.019543 |
| AB57_3036 |      | hypothetical protein                                        | -0.557778598 | 9.62E-07 | 3.27E-06 |
| AB57_3037 | gyrA | DNA gyrase, A subunit                                       | 1.453762095  | 1.28E-09 | 6.88E-09 |
| AB57_3038 |      | electron transfer flavoprotein subunit alpha                | 0.644326617  | 0.000491 | 0.001029 |
| AB57_3039 |      | electron transfer flavoprotein subunit beta                 | 0.462408553  | 0.00281  | 0.005133 |
| AB57_3040 | xerC | tyrosine recombinase XerC                                   | -0.473578051 | 0.000133 | 0.00031  |
| AB57_3041 |      | lysine exporter protein                                     | 0.155911964  | 0.169008 | 0.21386  |
| AB57_3042 |      | alpha/beta hydrolase fold protein                           | -0.243731812 | 0.038836 | 0.056217 |
| AB57_3043 | dapF | diaminopimelate epimerase                                   | 0.920475155  | 3.05E-07 | 1.11E-06 |
| AB57_3044 | lysA | diaminopimelate decarboxylase                               | 1.50975704   | 1.39E-13 | 1.47E-12 |
| AB57_3045 |      | hypothetical protein                                        | 1.17915259   | 4.37E-14 | 4.99E-13 |
| AB57_3046 |      | D-serine/D-alanine/glycine transporter                      | -1.408511882 | 1.23E-12 | 1.14E-11 |
| AB57_3048 | radA | DNA repair protein RadA                                     | 0.398187238  | 0.000299 | 0.000649 |
| AB57_3049 |      | hypothetical protein                                        | -0.06195119  | 0.690283 | 0.733079 |
| AB57_3050 |      | lysyl-tRNA synthetase                                       | 0.502626213  | 3.42E-05 | 8.85E-05 |
| AB57_3051 |      | D-isomer specific 2-hydroxyacid dehydrogenase, NAD-binding  | 0.666944977  | 9.35E-10 | 5.17E-09 |
| AB57_3052 |      | hypothetical protein                                        | -0.475544633 | 0.001491 | 0.002866 |
| AB57_3053 | fdhD | formate dehydrogenase accessory protein FdhD                | -0.025432671 | 0.843792 | 0.87086  |
| AB57_3054 |      | oxidoreductase alpha (molybdopterin) subunit                | -0.869495648 | 2.62E-11 | 1.89E-10 |
| AB57_3057 |      | transcriptional regulator, TetR family                      | 0.241924791  | 0.089611 | 0.120261 |
| AB57_3059 |      | oxidoreductase short chain dehydrogenase/reductase family   | 0.51411678   | 0.000468 | 0.000985 |
| AB57_3060 |      | nitroreductase family protein                               | -0.060550439 | 0.583793 | 0.637314 |
| AB57_3061 |      | transcriptional regulator, TetR family                      | -0.686777363 | 0.000497 | 0.00104  |
| AB57_3062 |      | hypothetical protein                                        | -0.824654591 | 6.93E-06 | 2.04E-05 |
| AB57_3064 |      | hypothetical protein                                        | -0.473051136 | 0.028165 | 0.042117 |
| AB57_3065 |      | hypothetical protein                                        | -0.782731454 | 3.33E-08 | 1.40E-07 |
| AB57_3066 |      | non-ribosomal peptide synthetase                            | -0.213592263 | 0.135248 | 0.174397 |
| AB57_3067 |      | hypothetical protein                                        | -0.537312264 | 8.35E-06 | 2.40E-05 |
| AB57_3068 | greB | transcription elongation factor GreB                        | -0.490822483 | 8.77E-06 | 2.51E-05 |
| AB57_3069 |      | lytic transglycosylase, catalytic                           | 1.369866191  | 2.96E-08 | 1.26E-07 |
| AB57_3070 |      | hypothetical protein                                        | 0.780694757  | 7.89E-06 | 2.28E-05 |
| AB57_3071 |      | PP-loop domain protein                                      | 1.405523811  | 4.18E-18 | 1.03E-16 |
| AB57_3072 |      | lytic transglycosylase, catalytic                           | 0.062511112  | 0.606857 | 0.658081 |
| AB57_3073 | htpX | heat shock protein HtpX                                     | 0.42723634   | 0.006399 | 0.010931 |
| AB57_3074 |      | hypothetical protein                                        | -0.122603659 | 0.352908 | 0.412432 |
| AB57_3075 |      | multidrug efflux protein                                    | -0.269300544 | 0.010519 | 0.017123 |
| AB57_3076 |      | glycerophosphoryl diester phosphodiesterase                 | -0.473869358 | 0.000324 | 0.000698 |
| AB57_3077 |      | metal-dependent hydrolase of the beta-lactamase superfamily | -0.231943459 | 0.043589 | 0.062366 |
| AB57_3078 |      | diacylglycerol kinase                                       | -0.252554118 | 0.096388 | 0.128057 |
| AB57_3079 | groL | chaperonin GroEL                                            | 0.921045308  | 4.67E-06 | 1.41E-05 |
| AB57_3080 | groS | co-chaperonin GroES                                         | 0.004271597  | 0.978116 | 0.982098 |
| AB57_3081 |      | biofilm-associated protein                                  | 0.286397206  | 0.100582 | 0.133245 |
| AB57_3082 |      | putative outer membrane adhesin like protein                | 0.352073517  | 0.001407 | 0.002719 |
| AB57_3083 |      | probable phosphodiesterase                                  | -0.3372347   | 0.03311  | 0.048691 |
| AB57_3084 |      | hypothetical protein                                        | -0.873081532 | 1.89E-06 | 6.13E-06 |
| AB57_3085 |      | phosphoenolpyruvate carboxykinase                           | 2.391333156  | 5.21E-17 | 1.05E-15 |
| AB57_3086 |      | glycerol-3-phosphate dehydrogenase                          | -0.511475117 | 8.48E-07 | 2.90E-06 |

|           |      |                                                               |              |          |          |
|-----------|------|---------------------------------------------------------------|--------------|----------|----------|
| AB57_3087 | glpK | glycerol kinase                                               | 0.225104393  | 0.029857 | 0.044437 |
| AB57_3088 |      | MFS permease                                                  | -0.570021419 | 5.09E-06 | 1.53E-05 |
| AB57_3089 |      | hypothetical protein                                          | -0.414425734 | 3.00E-05 | 7.85E-05 |
| AB57_3090 | prmA | ribosomal protein L11 methyltransferase                       | 0.304215118  | 0.003003 | 0.005458 |
| AB57_3091 |      | bifunctional 5,10-methylene-tetrahydrofolate dehydrogenase/ 5 | 1.075812681  | 2.10E-15 | 3.20E-14 |
| AB57_3092 |      | alkaline phosphatase                                          | -0.063523587 | 0.564193 | 0.619624 |
| AB57_3093 |      | hypothetical protein                                          | -0.355159188 | 0.013217 | 0.021115 |
| AB57_3094 |      | hypothetical protein                                          | 0.827106318  | 8.02E-09 | 3.73E-08 |
| AB57_3095 | folP | dihydropteroate synthase                                      | 0.090394112  | 0.409998 | 0.470969 |
| AB57_3096 | ftsH | cell division protein FtsH                                    | 0.314149289  | 0.072834 | 0.099681 |
| AB57_3097 | rrmJ | ribosomal RNA large subunit methyltransferase J               | -0.031527555 | 0.853513 | 0.879665 |
| AB57_3098 |      | hypothetical protein                                          | 0.681938003  | 1.91E-06 | 6.19E-06 |
| AB57_3099 |      | hypothetical protein                                          | 1.204167143  | 1.34E-17 | 3.03E-16 |
| AB57_3100 |      | hypothetical protein                                          | -0.08197427  | 0.423743 | 0.485101 |
| AB57_3101 | carA | carbamoyl phosphate synthase small subunit                    | 1.808266679  | 2.19E-14 | 2.64E-13 |
| AB57_3102 | carB | carbamoyl-phosphate synthase, large subunit                   | 0.730223842  | 6.21E-05 | 0.000153 |
| AB57_3103 | greA | transcription elongation factor GreA                          | 1.233970025  | 1.24E-11 | 9.49E-11 |
| AB57_3104 |      | chloramphenicol acetyltransferase                             | 0.182644787  | 0.142364 | 0.182422 |
| AB57_3105 |      | universal stress protein                                      | -0.656456989 | 3.40E-08 | 1.43E-07 |
| AB57_3106 |      | methylated-DNA--protein-cysteine methyltransferase            | -0.448436199 | 0.000409 | 0.000872 |
| AB57_3107 |      | hypothetical protein                                          | -0.460366238 | 0.001969 | 0.003727 |
| AB57_3108 |      | hypothetical protein                                          | -0.687198384 | 2.16E-08 | 9.44E-08 |
| AB57_3109 |      | hypothetical protein                                          | -0.439999463 | 0.000227 | 0.000506 |
| AB57_3110 |      | hypothetical protein                                          | -0.519925234 | 0.044154 | 0.063078 |
| AB57_3111 |      | hypothetical protein                                          | -0.43115264  | 0.000723 | 0.001473 |
| AB57_3112 |      | hypothetical protein                                          | -0.441021265 | 0.002352 | 0.004364 |
| AB57_3113 |      | biofilm-associated protein                                    | -0.525082031 | 0.001958 | 0.00371  |
| AB57_3114 |      | transposase (ISN1)                                            | -0.616475642 | 0.000158 | 0.000362 |
| AB57_3115 |      | putative Na <sup>+</sup> /H <sup>+</sup> antiporter           | -0.342091548 | 0.013662 | 0.021732 |
| AB57_3116 |      | metallopeptidase, zinc binding                                | -0.102140588 | 0.376509 | 0.436567 |
| AB57_3117 |      | hypothetical protein                                          | 0.136337881  | 0.285748 | 0.343492 |
| AB57_3118 | trpS | tryptophanyl-tRNA synthetase II                               | 1.391040978  | 4.44E-16 | 7.63E-15 |
| AB57_3119 |      | hypothetical protein                                          | -0.74399102  | 1.38E-08 | 6.20E-08 |
| AB57_3120 |      | hypothetical protein                                          | -0.707689242 | 7.76E-11 | 5.13E-10 |
| AB57_3122 | sucD | succinyl-CoA synthetase subunit alpha                         | 0.491896934  | 0.006678 | 0.011366 |
| AB57_3123 | sucC | succinyl-CoA synthetase subunit beta                          | 0.9317812    | 5.18E-08 | 2.13E-07 |
| AB57_3124 | lpdA | dihydrolipoamide dehydrogenase                                | 1.267903308  | 1.16E-11 | 8.94E-11 |
| AB57_3125 | sucB | 2-oxoglutarate dehydrogenase, E2 component, dihydrolipoamid   | 1.185962227  | 8.25E-10 | 4.61E-09 |
| AB57_3126 | sucA | 2-oxoglutarate dehydrogenase E1 component                     | 0.980129475  | 6.69E-08 | 2.71E-07 |
| AB57_3128 |      | succinate dehydrogenase iron-sulfur subunit                   | 0.537977481  | 0.002371 | 0.004393 |
| AB57_3129 | sdhA | succinate dehydrogenase flavoprotein subunit                  | 0.846974436  | 7.89E-06 | 2.28E-05 |
| AB57_3130 | sdhD | succinate dehydrogenase, hydrophobic membrane anchor prote    | 0.906311645  | 7.43E-09 | 3.48E-08 |
| AB57_3131 | sdhC | succinate dehydrogenase, cytochrome b556 subunit              | 0.359915595  | 0.018925 | 0.029213 |
| AB57_3132 | gltA | citrate synthase I                                            | 1.198301133  | 7.83E-11 | 5.16E-10 |
| AB57_3133 |      | hypothetical protein                                          | -0.52944257  | 2.82E-06 | 8.80E-06 |
| AB57_3134 |      | rhodanese domain protein                                      | 1.43624641   | 3.67E-20 | 1.21E-18 |
| AB57_3135 |      | hypothetical protein                                          | 0.552432482  | 1.67E-05 | 4.55E-05 |
| AB57_3136 |      | hypothetical protein                                          | 0.227046096  | 0.02655  | 0.039853 |
| AB57_3137 | rpoD | RNA polymerase sigma factor sigma-70                          | 0.709187689  | 0.000417 | 0.000887 |
| AB57_3138 |      | hypothetical protein                                          | -0.568807211 | 0.000245 | 0.000543 |
| AB57_3139 | lipB | lipoate-protein ligase B                                      | -0.305922382 | 0.006188 | 0.01061  |
| AB57_3140 |      | hypothetical protein                                          | -0.236637113 | 0.046366 | 0.065906 |
| AB57_3141 |      | alcohol dehydrogenase, class IV                               | 0.452018498  | 0.001075 | 0.002123 |
| AB57_3142 |      | putrescine importer                                           | 1.075910667  | 1.57E-07 | 5.99E-07 |
| AB57_3143 |      | hypothetical protein                                          | -0.323353351 | 0.001047 | 0.002073 |
| AB57_3144 |      | transcriptional regulator, PadR family                        | -0.638094242 | 5.53E-06 | 1.64E-05 |
| AB57_3145 |      | RNA methyltransferase, TrmH family                            | 0.926434283  | 1.17E-13 | 1.26E-12 |
| AB57_3146 |      | uroporphyrin-III C-methyltransferase                          | 0.490684583  | 0.000337 | 0.000725 |

|           |      |                                                     |              |          |          |
|-----------|------|-----------------------------------------------------|--------------|----------|----------|
| AB57_3147 | serS | seryl-tRNA synthetase                               | 0.613821509  | 0.000125 | 0.000293 |
| AB57_3148 |      | hypothetical protein                                | -0.833355381 | 1.07E-11 | 8.37E-11 |
| AB57_3149 | lolA | outer membrane lipoprotein carrier protein LolA     | 0.016048665  | 0.895042 | 0.914569 |
| AB57_3150 | rpmA | 50S ribosomal protein L27                           | 0.871475598  | 1.88E-06 | 6.09E-06 |
| AB57_3151 | rplU | 50S ribosomal protein L21                           | 0.921919291  | 5.70E-07 | 2.00E-06 |
| AB57_3153 |      | trans-hexaprenyltranstransferase                    | 0.728232662  | 3.79E-11 | 2.67E-10 |
| AB57_3154 |      | site-specific recombinase                           | 0.382806928  | 0.000185 | 0.000419 |
| AB57_3155 |      | hypothetical protein                                | -0.009827313 | 0.933415 | 0.945943 |
| AB57_3156 | adel | multidrug efflux protein Adel                       | 0.275402683  | 0.127867 | 0.165944 |
| AB57_3157 | adeJ | multidrug efflux protein AdeJ                       | 0.219433054  | 0.251103 | 0.306729 |
| AB57_3158 | adeK | multidrug efflux protein AdeK                       | 0.092153808  | 0.582133 | 0.636305 |
| AB57_3159 |      | hypothetical protein                                | -0.443612995 | 0.008824 | 0.014668 |
| AB57_3160 |      | hypothetical protein                                | -0.841226306 | 8.77E-15 | 1.17E-13 |
| AB57_3161 |      | hypothetical protein                                | -0.418849294 | 0.01014  | 0.016579 |
| AB57_3162 |      | short-chain dehydrogenase/reductase                 | 0.381606343  | 0.000125 | 0.000291 |
| AB57_3163 |      | hypothetical protein                                | -0.733195093 | 2.65E-06 | 8.31E-06 |
| AB57_3164 | valS | valyl-tRNA synthetase                               | 1.376631647  | 2.31E-10 | 1.40E-09 |
| AB57_3165 |      | hypothetical protein                                | -0.483177729 | 5.03E-06 | 1.51E-05 |
| AB57_3166 |      | DnaJ domain protein                                 | -0.672192191 | 0.000351 | 0.000752 |
| AB57_3167 |      | hypothetical protein                                | -0.395465737 | 0.015874 | 0.024834 |
| AB57_3168 |      | hypothetical protein                                | -0.31922819  | 0.076364 | 0.104184 |
| AB57_3169 |      | transcriptional regulator, LysR family              | -0.426813638 | 0.000552 | 0.001146 |
| AB57_3170 |      | ammonium transporter                                | -0.587867681 | 4.51E-07 | 1.60E-06 |
| AB57_3171 |      | hypothetical protein                                | -0.676553374 | 0.000874 | 0.001756 |
| AB57_3172 |      | two-component system sensor kinase                  | -0.190889012 | 0.074146 | 0.101344 |
| AB57_3173 |      | two-component system DNA-binding response regulator | -0.030213804 | 0.809711 | 0.84179  |
| AB57_3174 | pmrC | lipid A phosphoethanolamine transferase             | -0.294770446 | 0.011963 | 0.019296 |
| AB57_3175 |      | hypothetical protein                                | -0.183897957 | 0.242657 | 0.297492 |
| AB57_3176 |      | major facilitator superfamily MFS_1                 | -0.494707858 | 0.002104 | 0.00395  |
| AB57_3177 |      | phospholipid/glycerol acyltransferase               | -0.008844449 | 0.953993 | 0.963893 |
| AB57_3178 |      | hypothetical protein                                | 0.881856672  | 1.09E-13 | 1.18E-12 |
| AB57_3179 |      | hypothetical protein                                | -0.256692266 | 0.014846 | 0.023405 |
| AB57_3180 |      | band 7 protein                                      | 0.392785585  | 0.00027  | 0.000593 |
| AB57_3181 |      | hypothetical protein                                | -0.831422645 | 7.78E-13 | 7.40E-12 |
| AB57_3182 |      | polyprenyl synthetase                               | 0.136215566  | 0.206078 | 0.256126 |
| AB57_3183 | prpF | AcnD-accessory protein PrpF                         | 0.292276167  | 0.007777 | 0.013086 |
| AB57_3185 |      | aromatic amino acid transport protein               | 0.240347143  | 0.113313 | 0.148515 |
| AB57_3186 |      | hypothetical protein                                | -0.365570099 | 0.06221  | 0.086436 |
| AB57_3187 |      | site-specific recombinase, phage integrase family   | -0.377347114 | 0.005187 | 0.009043 |
| AB57_3188 |      | hypothetical protein                                | -0.342518291 | 0.022522 | 0.034336 |
| AB57_3189 |      | hypothetical protein                                | 0.116824533  | 0.332068 | 0.39179  |
| AB57_3190 |      | hypothetical protein                                | 0.539601112  | 7.58E-06 | 2.20E-05 |
| AB57_3191 |      | hypothetical protein                                | 0.184719006  | 0.327302 | 0.38703  |
| AB57_3192 |      | hypothetical protein                                | -0.018996848 | 0.937415 | 0.949216 |
| AB57_3193 |      | hypothetical protein                                | -0.482373596 | 0.000163 | 0.000372 |
| AB57_3195 |      | hypothetical protein                                | 0.182319677  | 0.415382 | 0.476436 |
| AB57_3197 |      | tail tape measure protein                           | -0.699441223 | 3.74E-09 | 1.85E-08 |
| AB57_3200 |      | hypothetical protein                                | -0.833914412 | 4.35E-05 | 0.00011  |
| AB57_3202 |      | hypothetical protein                                | -0.864539119 | 8.05E-13 | 7.63E-12 |
| AB57_3203 |      | hypothetical protein                                | -0.263726177 | 0.172294 | 0.217722 |
| AB57_3204 |      | Arc domain protein DNA binding domain protein       | -0.198463074 | 0.262977 | 0.319336 |
| AB57_3205 |      | hypothetical protein                                | -0.448914311 | 1.12E-05 | 3.15E-05 |
| AB57_3206 |      | lipoprotein, putative                               | -0.140543367 | 0.240986 | 0.295541 |
| AB57_3207 |      | hypothetical protein                                | 0.007261804  | 0.959554 | 0.967661 |
| AB57_3208 |      | helix-turn-helix domain protein                     | -0.171676131 | 0.13857  | 0.178148 |
| AB57_3209 |      | hypothetical protein                                | -0.389122215 | 0.015138 | 0.023784 |
| AB57_3210 |      | hypothetical protein                                | -0.184881648 | 0.387618 | 0.447763 |
| AB57_3211 |      | hypothetical protein                                | 0.058736517  | 0.764909 | 0.800385 |



|           |      |                                                         |              |          |          |
|-----------|------|---------------------------------------------------------|--------------|----------|----------|
| AB57_3212 |      | putative tail fiber                                     | -0.69906198  | 4.19E-07 | 1.50E-06 |
| AB57_3213 |      | hypothetical protein                                    | -0.838938153 | 2.80E-05 | 7.37E-05 |
| AB57_3214 |      | hypothetical protein                                    | -0.703013695 | 2.18E-09 | 1.13E-08 |
| AB57_3215 |      | hypothetical protein                                    | -1.012771815 | 2.91E-15 | 4.30E-14 |
| AB57_3216 |      | hypothetical protein                                    | -0.325507095 | 0.002764 | 0.005058 |
| AB57_3217 |      | hypothetical protein                                    | -0.505314675 | 0.054681 | 0.076782 |
| AB57_3219 |      | hypothetical protein                                    | 0.387655853  | 0.053164 | 0.074825 |
| AB57_3220 |      | prophage LambdaCh01, coat protein                       | 0.122425983  | 0.459175 | 0.519555 |
| AB57_3221 |      | hypothetical protein                                    | 0.722097979  | 1.57E-05 | 4.29E-05 |
| AB57_3225 |      | phage putative head morphogenesis protein               | -0.366815587 | 0.012863 | 0.020603 |
| AB57_3226 |      | hypothetical protein                                    | -0.735741438 | 2.60E-06 | 8.19E-06 |
| AB57_3227 |      | terminase                                               | -0.605103107 | 0.002355 | 0.004368 |
| AB57_3229 |      | hypothetical protein                                    | -0.808969738 | 3.46E-05 | 8.93E-05 |
| AB57_3231 |      | hypothetical protein                                    | 0.186802908  | 0.335653 | 0.395767 |
| AB57_3232 |      | hypothetical protein                                    | 0.135140998  | 0.511478 | 0.570536 |
| AB57_3233 |      | hypothetical protein                                    | 0.262903344  | 0.009399 | 0.015497 |
| AB57_3234 |      | hypothetical protein                                    | 0.203334277  | 0.132647 | 0.171246 |
| AB57_3236 |      | hypothetical protein                                    | -0.697765006 | 2.05E-06 | 6.58E-06 |
| AB57_3237 |      | hypothetical protein                                    | -0.765253072 | 5.31E-05 | 0.000132 |
| AB57_3239 |      | hypothetical protein                                    | -0.124877776 | 0.583813 | 0.637314 |
| AB57_3243 |      | gp12                                                    | -0.415475974 | 0.0367   | 0.053461 |
| AB57_3246 |      | replicative DNA helicase                                | -0.256859377 | 0.149395 | 0.190541 |
| AB57_3247 |      | prophage LambdaBa04, DnaD replication protein, putative | -0.510154781 | 0.000664 | 0.00136  |
| AB57_3248 |      | hypothetical protein                                    | -0.317781613 | 0.149612 | 0.190752 |
| AB57_3249 |      | hypothetical protein                                    | 0.54807326   | 0.004808 | 0.008423 |
| AB57_3251 |      | putative transcriptional regulator, Cro/C1 family       | 0.454538263  | 1.21E-05 | 3.38E-05 |
| AB57_3252 |      | hypothetical protein                                    | 0.337320285  | 0.020107 | 0.030907 |
| AB57_3255 |      | hypothetical protein                                    | -0.614560464 | 0.001292 | 0.002514 |
| AB57_3257 |      | hypothetical protein                                    | -0.048667022 | 0.776095 | 0.810943 |
| AB57_3258 |      | hypothetical protein                                    | 0.037223653  | 0.856458 | 0.882454 |
| AB57_3259 |      | hypothetical protein                                    | -0.068040346 | 0.556197 | 0.613026 |
| AB57_3260 |      | hypothetical protein                                    | -0.121935456 | 0.367262 | 0.427452 |
| AB57_3261 |      | hypothetical protein                                    | 0.239899323  | 0.194561 | 0.243365 |
| AB57_3265 |      | chaperone protein HchA                                  | -0.294530304 | 0.010494 | 0.017098 |
| AB57_3266 |      | NADPH:quinone oxidoreductase                            | -0.096982381 | 0.330723 | 0.390577 |
| AB57_3267 |      | transcriptional regulator, AraC family                  | -0.379121995 | 0.008578 | 0.014304 |
| AB57_3268 | uppP | undecaprenyl pyrophosphate phosphatase                  | 1.021151768  | 7.58E-09 | 3.54E-08 |
| AB57_3269 |      | hypothetical protein                                    | -0.679049361 | 1.97E-10 | 1.21E-09 |
| AB57_3270 |      | fatty acid desaturase                                   | 0.157298134  | 0.134932 | 0.174075 |
| AB57_3273 |      | NAD(P)H dehydrogenase, quinone family                   | -0.658194314 | 1.25E-06 | 4.18E-06 |
| AB57_3274 |      | aromatic hydrocarbon degradation membrane protein       | -0.262741952 | 0.174284 | 0.220086 |
| AB57_3275 | thrH | phosphoserine phosphatase                               | 1.7239657    | 3.52E-30 | 6.20E-28 |
| AB57_3276 |      | phosphoadenosine phosphosulfate reductase               | 0.336480491  | 0.001765 | 0.00337  |
| AB57_3277 |      | hypothetical protein                                    | -0.537220429 | 0.000127 | 0.000297 |
| AB57_3278 |      | hypothetical protein                                    | -0.616249979 | 1.32E-05 | 3.66E-05 |
| AB57_3279 |      | ribonuclease G                                          | 0.681922973  | 6.24E-06 | 1.84E-05 |
| AB57_3280 | maf  | Maf-like protein                                        | 0.506798305  | 3.15E-05 | 8.23E-05 |
| AB57_3281 | mreD | rod shape-determining protein MreD                      | 0.518501421  | 9.12E-06 | 2.60E-05 |
| AB57_3282 | mreC | rod shape-determining protein MreC                      | 0.956257735  | 2.91E-10 | 1.74E-09 |
| AB57_3283 | mreB | rod shape-determining protein MreB                      | 0.973225319  | 2.60E-08 | 1.12E-07 |
| AB57_3284 |      | glutamyl-tRNA(Gln) amidotransferase, C subunit          | 1.045374356  | 4.47E-14 | 5.08E-13 |
| AB57_3285 |      | aspartyl/glutamyl-tRNA amidotransferase subunit A       | 1.483197063  | 2.87E-13 | 2.90E-12 |
| AB57_3286 |      | aspartyl/glutamyl-tRNA amidotransferase subunit B       | 1.115895385  | 2.44E-08 | 1.06E-07 |
| AB57_3287 |      | intracellular protease, Pfpl family                     | -0.16906973  | 0.118316 | 0.154416 |
| AB57_3288 |      | hypothetical protein                                    | -0.691053637 | 8.32E-05 | 0.0002   |
| AB57_3289 |      | hypothetical protein                                    | -0.308277384 | 0.018415 | 0.028509 |
| AB57_3290 |      | hypothetical protein                                    | -0.715769473 | 9.60E-08 | 3.79E-07 |
| AB57_3291 |      | transport protein                                       | -0.488722739 | 3.34E-05 | 8.67E-05 |

|           |      |                                                                |              |          |          |
|-----------|------|----------------------------------------------------------------|--------------|----------|----------|
| AB57_3292 | ilvA | threonine dehydratase                                          | 0.215716721  | 0.034235 | 0.050148 |
| AB57_3293 |      | phospholipase, patatin family                                  | -0.385235871 | 0.00201  | 0.003795 |
| AB57_3294 |      | amino-acid transport protein                                   | 0.71718207   | 0.000257 | 0.000565 |
| AB57_3296 |      | hypothetical protein                                           | 0.710973932  | 5.46E-06 | 1.62E-05 |
| AB57_3297 |      | nitroreductase                                                 | 0.560507291  | 7.62E-08 | 3.06E-07 |
| AB57_3298 |      | drug resistance transporter, Bcr/CflA subfamily                | -0.106025334 | 0.353795 | 0.413338 |
| AB57_3299 |      | hypothetical protein                                           | -0.262363071 | 0.023945 | 0.036295 |
| AB57_3300 |      | hypothetical protein                                           | 0.741061011  | 6.11E-08 | 2.49E-07 |
| AB57_3301 |      | flavodoxin/nitric oxide synthase                               | 0.139852485  | 0.303945 | 0.362773 |
| AB57_3302 |      | hypothetical protein                                           | 0.615001193  | 2.43E-06 | 7.68E-06 |
| AB57_3303 |      | ErfK/YbiS/YcfS/YnhG family protein                             | -0.29668735  | 0.037795 | 0.054905 |
| AB57_3304 |      | hypothetical protein                                           | -0.201882661 | 0.269668 | 0.326176 |
| AB57_3305 |      | hypothetical protein                                           | -0.629628462 | 0.000612 | 0.001263 |
| AB57_3306 |      | entericidin EcnAB                                              | -1.150333546 | 3.44E-12 | 2.96E-11 |
| AB57_3307 | dapE | succinyl-diaminopimelate desuccinylase                         | 1.857730233  | 1.37E-24 | 9.57E-23 |
| AB57_3308 |      | alpha/beta hydrolase fold protein                              | -0.361381531 | 0.002714 | 0.004973 |
| AB57_3309 |      | coproporphyrinogen III oxidase                                 | -0.248964781 | 0.0314   | 0.046472 |
| AB57_3310 |      | hypothetical protein                                           | -0.406039533 | 0.0074   | 0.01249  |
| AB57_3311 | pilL | type IV pilus hybrid sensor kinase/response regulator PilL     | -0.410098687 | 0.001415 | 0.00273  |
| AB57_3312 |      | type IV pilus methyl-accepting chemotaxis sensory transducer P | -0.022753057 | 0.857452 | 0.882741 |
| AB57_3313 | pill | type IV pilus signal transduction protein Pill                 | 0.028164992  | 0.867892 | 0.892496 |
| AB57_3314 | pilH | type IV pilus response regulator protein PilH                  | -0.004882724 | 0.975585 | 0.980621 |
| AB57_3315 | pilG | type IV pilus response regulator receiver protein PilG         | 0.106778229  | 0.323788 | 0.383243 |
| AB57_3316 |      | hypothetical protein                                           | -0.54004234  | 0.002385 | 0.004415 |
| AB57_3317 |      | multidrug efflux protein                                       | -0.114593708 | 0.283879 | 0.341578 |
| AB57_3318 |      | multidrug efflux protein                                       | 0.178281444  | 0.116502 | 0.152156 |
| AB57_3319 | proS | prolyl-tRNA synthetase                                         | 0.907035041  | 5.03E-06 | 1.51E-05 |
| AB57_3320 |      | hypothetical protein                                           | -0.771163172 | 1.08E-08 | 4.90E-08 |
| AB57_3321 | phnA | alkylphosphonate utilization operon protein PhnA               | -0.257516074 | 0.032533 | 0.0479   |
| AB57_3322 |      | hypothetical protein                                           | -0.946117773 | 2.16E-06 | 6.87E-06 |
| AB57_3323 |      | hypothetical protein                                           | -1.048345773 | 3.47E-18 | 8.61E-17 |
| AB57_3324 |      | hypothetical protein                                           | 0.49987512   | 9.30E-07 | 3.17E-06 |
| AB57_3325 |      | thiol:disulfide interchange protein DsbC                       | 0.039460181  | 0.718164 | 0.758769 |
| AB57_3326 |      | hypothetical protein                                           | -1.212559476 | 3.73E-19 | 1.10E-17 |
| AB57_3327 |      | auxin efflux Carrier                                           | -0.921798787 | 5.82E-16 | 9.83E-15 |
| AB57_3328 |      | NADPH dehydrogenase                                            | 0.41305308   | 0.000344 | 0.000739 |
| AB57_3329 |      | TonB-dependent receptor                                        | 0.453196982  | 0.000129 | 0.000301 |
| AB57_3330 |      | DNA-3-methyladenine glycosylase                                | -0.427224455 | 0.001173 | 0.002303 |
| AB57_3333 |      | peptidyl-prolyl cis-trans isomerase                            | -0.026910081 | 0.805279 | 0.83836  |
| AB57_3334 |      | hypothetical protein                                           | -0.508858047 | 3.07E-05 | 8.02E-05 |
| AB57_3335 | mscL | large-conductance mechanosensitive channel                     | -0.15382072  | 0.13881  | 0.178394 |
| AB57_3336 | typA | GTP-binding protein TypA/BipA                                  | 2.209636441  | 1.31E-14 | 1.67E-13 |
| AB57_3338 |      | uracil-xanthine permease                                       | 2.012473535  | 1.77E-19 | 5.46E-18 |
| AB57_3339 |      | ribosomal RNA small subunit methyltransferase C                | 2.422153646  | 1.71E-14 | 2.12E-13 |
| AB57_3340 |      | ribosomal RNA small subunit methyltransferase C                | 1.76696831   | 3.12E-18 | 7.86E-17 |
| AB57_3341 |      | amino-acid transport protein                                   | 1.554236317  | 2.27E-11 | 1.66E-10 |
| AB57_3342 |      | hypothetical protein                                           | -0.010905611 | 0.919174 | 0.934325 |
| AB57_3343 |      | hypothetical protein                                           | -0.337763758 | 0.003855 | 0.006875 |
| AB57_3344 |      | outer membrane protein A                                       | -0.01929904  | 0.898865 | 0.917462 |
| AB57_3345 |      | type 4 fimbrial biogenesis protein FimT                        | -0.257654905 | 0.090308 | 0.121153 |
| AB57_3346 |      | acetyl-CoA acetyltransferase                                   | 1.091514752  | 2.29E-14 | 2.75E-13 |
| AB57_3347 |      | hypothetical protein                                           | -1.284861062 | 1.29E-20 | 4.76E-19 |
| AB57_3348 |      | quaternary ammonium compound-resistance protein                | -1.446184853 | 4.54E-21 | 1.82E-19 |
| AB57_3349 |      | hypothetical protein                                           | 0.4161307    | 0.000224 | 0.000501 |
| AB57_3350 |      | sulfite reductase                                              | 0.862429011  | 1.27E-11 | 9.70E-11 |
| AB57_3351 |      | glucose dehydrogenase                                          | 0.142897397  | 0.434386 | 0.495447 |
| AB57_3353 |      | porin B                                                        | -0.001014052 | 0.994522 | 0.995329 |
| AB57_3354 |      | alpha-methylacyl-CoA racemase                                  | -0.798896076 | 1.49E-06 | 4.94E-06 |

|           |      |                                                               |              |          |          |
|-----------|------|---------------------------------------------------------------|--------------|----------|----------|
| AB57_3355 |      | transcriptional regulator, AraC family                        | 0.361497247  | 0.002775 | 0.005073 |
| AB57_3356 |      | acetyl-CoA acetyltransferase                                  | 0.265090171  | 0.010003 | 0.01639  |
| AB57_3357 |      | 3-hydroxyacyl-CoA dehydrogenase                               | 0.24284174   | 0.069002 | 0.094981 |
| AB57_3358 |      | hypothetical protein                                          | 0.478655331  | 0.000304 | 0.000659 |
| AB57_3359 |      | phospholipase, patatin family                                 | 0.88308541   | 1.21E-15 | 1.93E-14 |
| AB57_3360 |      | acetyltransferase, gnat family                                | -0.286783882 | 0.017479 | 0.027162 |
| AB57_3363 |      | hemolysin-3                                                   | -0.37351481  | 0.00077  | 0.001563 |
| AB57_3364 |      | metabolite transport protein                                  | -0.324849381 | 0.013599 | 0.021642 |
| AB57_3365 |      | hypothetical protein                                          | -0.251513538 | 0.031166 | 0.0462   |
| AB57_3366 | secA | preprotein translocase subunit SecA                           | 0.435792472  | 0.011169 | 0.018096 |
| AB57_3367 |      | peroxidase                                                    | -1.390125758 | 4.57E-06 | 1.38E-05 |
| AB57_3368 |      | metallo-beta-lactamase superfamily protein                    | -0.129631435 | 0.41063  | 0.471549 |
| AB57_3369 |      | protein tyrosine/serine phosphatase                           | -0.044686696 | 0.814608 | 0.846167 |
| AB57_3370 |      | hypothetical protein                                          | 0.335032732  | 0.004327 | 0.007656 |
| AB57_3371 | folC | folypolyglutamate synthetase/dihydrofolate synthase           | 0.360705177  | 0.002213 | 0.004121 |
| AB57_3372 | accD | acetyl-CoA carboxylase, carboxyl transferase, beta subunit    | 0.586031764  | 5.80E-05 | 0.000143 |
| AB57_3373 | trpA | tryptophan synthase subunit alpha                             | 0.141120624  | 0.330046 | 0.389901 |
| AB57_3374 |      | transcriptional regulator, AraC family                        | -0.042807585 | 0.727278 | 0.766864 |
| AB57_3377 |      | hypothetical protein                                          | -0.250952675 | 0.042561 | 0.061084 |
| AB57_3378 |      | hypothetical protein                                          | 0.718418582  | 5.76E-11 | 3.91E-10 |
| AB57_3379 | trpB | tryptophan synthase subunit beta                              | 1.057930919  | 1.22E-09 | 6.59E-09 |
| AB57_3380 | trpF | phosphoribosylanthranilate isomerase                          | 0.613649252  | 9.95E-09 | 4.55E-08 |
| AB57_3381 |      | vitamin B12 receptor                                          | 0.941301953  | 4.72E-06 | 1.42E-05 |
| AB57_3382 |      | cobalamin adenosyltransferase                                 | 1.092332274  | 7.96E-21 | 3.04E-19 |
| AB57_3383 |      | glycerophosphoryl diester phosphodiesterase                   | 0.314063842  | 0.002924 | 0.005321 |
| AB57_3384 |      | hypothetical protein                                          | -0.047247876 | 0.693586 | 0.736375 |
| AB57_3385 |      | stearoyl-CoA 9-desaturase                                     | 0.807527261  | 2.43E-05 | 6.46E-05 |
| AB57_3386 |      | hypothetical protein                                          | -0.531495629 | 9.92E-06 | 2.80E-05 |
| AB57_3387 |      | two component signal transduction system response regulator   | 0.322490256  | 0.004562 | 0.008019 |
| AB57_3388 |      | two component signal transduction system kinase sensor comp   | -0.358216382 | 0.000293 | 0.000638 |
| AB57_3389 |      | hypothetical protein                                          | -0.950753218 | 1.21E-12 | 1.12E-11 |
| AB57_3390 |      | acyl-CoA dehydrogenase                                        | 0.346006061  | 0.045443 | 0.064694 |
| AB57_3391 |      | acyl-CoA dehydrogenase                                        | 1.097231538  | 6.14E-12 | 5.00E-11 |
| AB57_3392 |      | phosphate-starvation-inducible E                              | -0.65127624  | 9.54E-10 | 5.26E-09 |
| AB57_3393 |      | hypothetical protein                                          | -1.346451306 | 9.57E-25 | 7.09E-23 |
| AB57_3394 |      | hypothetical protein                                          | 0.366754988  | 0.000809 | 0.001638 |
| AB57_3395 |      | hypothetical protein                                          | 0.046887406  | 0.669569 | 0.714155 |
| AB57_3396 |      | TonB-dependent receptor                                       | 0.439031888  | 0.001302 | 0.002531 |
| AB57_3397 |      | hypothetical protein                                          | -0.583673229 | 5.55E-05 | 0.000138 |
| AB57_3398 | aspS | aspartyl-tRNA synthetase                                      | 1.580607304  | 1.68E-15 | 2.59E-14 |
| AB57_3399 |      | hypothetical protein                                          | -0.398868589 | 0.000815 | 0.001648 |
| AB57_3400 |      | glycosyltransferase                                           | -0.294791813 | 0.041408 | 0.059673 |
| AB57_3401 |      | hypothetical protein                                          | 0.543403842  | 5.11E-05 | 0.000128 |
| AB57_3402 |      | LPS glycosyltransferase subfamily                             | -0.271731005 | 0.013562 | 0.021611 |
| AB57_3403 |      | glycosyltransferase                                           | 0.39702675   | 0.000142 | 0.000329 |
| AB57_3404 |      | hypothetical protein                                          | -0.061988456 | 0.599038 | 0.650745 |
| AB57_3405 |      | glycosyltransferase                                           | 0.282061061  | 0.009071 | 0.015011 |
| AB57_3406 |      | putative polysaccharide deacetylase                           | 0.628543265  | 2.70E-08 | 1.15E-07 |
| AB57_3407 |      | hypothetical protein                                          | 0.359631566  | 0.000265 | 0.000584 |
| AB57_3408 |      | hypothetical protein                                          | -0.021268952 | 0.832028 | 0.860879 |
| AB57_3409 | ilvE | branched-chain amino acid aminotransferase                    | 0.744049868  | 3.48E-06 | 1.07E-05 |
| AB57_3410 | glnE | bifunctional glutamine-synthetase adenylyltransferase/deadeny | -0.151918677 | 0.23434  | 0.288155 |
| AB57_3411 |      | two-component system histidine kinase sensor component        | -1.366212229 | 2.07E-16 | 3.81E-15 |
| AB57_3412 | queA | S-adenosylmethionine:tRNA ribosyltransferase-isomerase        | 0.842460174  | 2.39E-10 | 1.44E-09 |
| AB57_3413 |      | hypothetical protein                                          | -0.558195017 | 3.10E-06 | 9.63E-06 |
| AB57_3414 |      | LemA family                                                   | -0.026092298 | 0.856962 | 0.88252  |
| AB57_3415 | tgt  | queuine tRNA-ribosyltransferase                               | 1.258545797  | 3.08E-13 | 3.09E-12 |
| AB57_3416 | yajC | preprotein translocase, YajC subunit                          | 0.958002409  | 4.66E-09 | 2.26E-08 |

|           |       |                                                           |              |          |          |
|-----------|-------|-----------------------------------------------------------|--------------|----------|----------|
| AB57_3417 | secD  | preprotein translocase subunit SecD                       | 0.73689686   | 3.98E-05 | 0.000102 |
| AB57_3418 | secF  | preprotein translocase subunit SecF                       | 0.432461666  | 0.009931 | 0.016296 |
| AB57_3419 | coaBC | phosphopantothencysteine decarboxylase/phosphopantothe    | 0.331467131  | 0.004037 | 0.007167 |
| AB57_3420 |       | DNA repair protein RadC                                   | -0.538161884 | 3.41E-05 | 8.84E-05 |
| AB57_3422 |       | hypothetical protein                                      | -0.560747716 | 0.00015  | 0.000345 |
| AB57_3423 |       | PHP domain protein                                        | -0.551847232 | 4.33E-06 | 1.32E-05 |
| AB57_3424 | ispZ  | intracellular septation protein A                         | 0.132355677  | 0.295277 | 0.353453 |
| AB57_3425 |       | YCII-related protein                                      | 0.24442238   | 0.023152 | 0.035151 |
| AB57_3426 |       | hypothetical protein                                      | 0.893384668  | 1.38E-14 | 1.74E-13 |
| AB57_3427 |       | rhodanese domain protein                                  | -0.512062336 | 2.42E-05 | 6.46E-05 |
| AB57_3428 |       | hypothetical protein                                      | 0.883870377  | 5.89E-11 | 3.97E-10 |
| AB57_3429 |       | putative nucleotide-binding protein                       | 0.105068105  | 0.311267 | 0.369842 |
| AB57_3430 |       | hypothetical protein                                      | -0.060641315 | 0.64488  | 0.69081  |
| AB57_3431 |       | hypothetical protein                                      | 0.696485922  | 4.25E-09 | 2.10E-08 |
| AB57_3432 |       | thioredoxin                                               | 0.367225274  | 0.003659 | 0.006555 |
| AB57_3433 |       | hypothetical protein                                      | -0.661992519 | 1.48E-05 | 4.08E-05 |
| AB57_3434 |       | hypothetical protein                                      | 0.16829418   | 0.100158 | 0.132826 |
| AB57_3435 |       | hypothetical protein                                      | -0.583952136 | 3.97E-08 | 1.66E-07 |
| AB57_3436 |       | dihydrolipoamide dehydrogenase                            | -0.395510684 | 0.002041 | 0.00384  |
| AB57_3438 |       | hypothetical protein                                      | 0.064886236  | 0.562299 | 0.617911 |
| AB57_3439 |       | GGDEF domain protein                                      | -0.086820137 | 0.445497 | 0.506103 |
| AB57_3440 |       | OmpA/MotB                                                 | 0.012922665  | 0.920043 | 0.934695 |
| AB57_3441 |       | Ser/Thr protein phosphatase family protein                | -0.273305377 | 0.011803 | 0.019053 |
| AB57_3442 |       | phospholipase D/transphosphatidylase                      | -0.184314574 | 0.072848 | 0.099681 |
| AB57_3443 |       | phospholipid/glycerol acyltransferase                     | -0.211349741 | 0.071334 | 0.097826 |
| AB57_3444 |       | GTP-binding proten                                        | 0.329903325  | 0.000812 | 0.001642 |
| AB57_3445 |       | hypothetical protein                                      | -0.025049205 | 0.836329 | 0.864121 |
| AB57_3446 |       | LrgB family protein                                       | -0.082374555 | 0.531999 | 0.589517 |
| AB57_3447 |       | hypothetical protein                                      | -0.787983263 | 3.13E-13 | 3.13E-12 |
| AB57_3448 |       | diadenosine tetraphosphatase                              | 0.752840742  | 8.36E-06 | 2.40E-05 |
| AB57_3449 | ksgA  | dimethyladenosine transferase                             | 0.711064875  | 3.05E-06 | 9.50E-06 |
| AB57_3450 | pdxA  | 4-hydroxythreonine-4-phosphate dehydrogenase              | -0.018101878 | 0.873128 | 0.895889 |
| AB57_3451 | rplM  | 50S ribosomal protein L13                                 | 2.191144543  | 2.29E-20 | 7.83E-19 |
| AB57_3452 | rpsI  | ribosomal protein S9                                      | 1.947927642  | 4.54E-19 | 1.32E-17 |
| AB57_3453 | sspA  | stringent starvation protein A                            | -0.408837947 | 0.000977 | 0.001945 |
| AB57_3454 | sspB  | ClpXP protease specificity-enhancing factor               | -0.069422003 | 0.50607  | 0.565185 |
| AB57_3455 |       | hypothetical protein                                      | 0.31935355   | 0.006997 | 0.011881 |
| AB57_3456 |       | acetyl-/propionyl-coenzyme A carboxylase alpha chain      | -0.09654849  | 0.404907 | 0.4657   |
| AB57_3457 |       | enoyl-CoA hydratase                                       | 0.065359478  | 0.675096 | 0.719014 |
| AB57_3458 |       | acyl-CoA dehydrogenase                                    | 0.135024003  | 0.195918 | 0.244649 |
| AB57_3459 |       | methylcrotonoyl-CoA carboxylase beta chain                | 0.173504286  | 0.16735  | 0.211981 |
| AB57_3460 |       | oxidoreductase short-chain dehydrogenase/reductase family | 0.407552593  | 0.014145 | 0.022414 |
| AB57_3461 |       | hypothetical protein                                      | 0.716258976  | 1.13E-11 | 8.76E-11 |
| AB57_3463 |       | transcriptional regulator, TetR family                    | 0.969272214  | 6.65E-14 | 7.37E-13 |
| AB57_3464 |       | acyl-CoA dehydrogenase                                    | -0.183679296 | 0.075744 | 0.103452 |
| AB57_3465 |       | hypothetical protein                                      | -0.462150445 | 2.52E-05 | 6.68E-05 |
| AB57_3466 |       | hypothetical protein                                      | -0.398902279 | 0.000949 | 0.001897 |
| AB57_3468 |       | hypothetical protein                                      | -0.692887564 | 1.07E-10 | 6.89E-10 |
| AB57_3469 |       | CDP-diacylglycerol--serine O-phosphatidyltransferase      | 0.65819783   | 4.51E-06 | 1.37E-05 |
| AB57_3470 |       | hypothetical protein                                      | 0.710533609  | 1.83E-06 | 5.96E-06 |
| AB57_3471 |       | oxygenase                                                 | 0.573381474  | 7.68E-07 | 2.64E-06 |
| AB57_3472 |       | hypothetical protein                                      | -0.270078961 | 0.037024 | 0.053891 |
| AB57_3473 |       | hypothetical protein                                      | -0.973721354 | 3.31E-15 | 4.82E-14 |
| AB57_3474 |       | malate dehydrogenase                                      | 1.818847128  | 2.21E-20 | 7.63E-19 |
| AB57_3475 |       | hypothetical protein                                      | 0.414580689  | 8.76E-05 | 0.00021  |
| AB57_3476 |       | lytic transglycosylase, catalytic                         | -0.068465643 | 0.566444 | 0.621727 |
| AB57_3477 | miaB  | (dimethylallyl)adenosine tRNA methylthiotransferase       | 1.393044169  | 1.18E-08 | 5.34E-08 |
| AB57_3478 |       | phosphate starvation-inducible protein                    | -0.288173459 | 0.057422 | 0.080326 |

|           |      |                                                 |              |          |          |
|-----------|------|-------------------------------------------------|--------------|----------|----------|
| AB57_3479 |      | hypothetical protein                            | 0.54330292   | 3.58E-06 | 1.10E-05 |
| AB57_3480 |      | TonB family protein                             | 0.31225746   | 0.041416 | 0.059673 |
| AB57_3481 |      | hypothetical protein                            | 0.215486513  | 0.130302 | 0.168631 |
| AB57_3482 |      | hypothetical protein                            | -0.415950641 | 0.000135 | 0.000315 |
| AB57_3483 | xpt  | xanthine phosphoribosyltransferase              | 1.589919845  | 1.87E-22 | 9.23E-21 |
| AB57_3484 |      | flavodoxin/nitric oxide synthase                | 0.007487857  | 0.943488 | 0.954582 |
| AB57_3485 |      | putative ribonuclease                           | -0.674633481 | 2.06E-09 | 1.07E-08 |
| AB57_3486 |      | hypothetical protein                            | 0.048771454  | 0.684059 | 0.726886 |
| AB57_3487 |      | transcriptional regulator, AraC family          | -0.544029596 | 5.83E-05 | 0.000144 |
| AB57_3488 |      | fumarylacetoacetate hydrolase                   | 0.520312877  | 9.83E-07 | 3.33E-06 |
| AB57_3489 |      | hypothetical protein                            | -0.089514204 | 0.441508 | 0.50264  |
| AB57_3490 |      | nitroreductase family protein                   | 0.240033807  | 0.073559 | 0.100617 |
| AB57_3491 |      | hypothetical protein                            | -0.757523679 | 1.52E-07 | 5.80E-07 |
| AB57_3492 |      | HAD-superfamily subfamily IB hydrolase          | 0.086073384  | 0.549277 | 0.606483 |
| AB57_3493 | nrn  | ribonuclease R                                  | -0.046377179 | 0.729856 | 0.768926 |
| AB57_3494 |      | oligopeptidase A                                | 0.083941016  | 0.566167 | 0.621608 |
| AB57_3495 |      | hypothetical protein                            | 0.098962824  | 0.381157 | 0.441127 |
| AB57_3496 |      | hypothetical protein                            | 0.561581759  | 1.78E-06 | 5.83E-06 |
| AB57_3497 |      | TRAP C4-dicarboxylate transport system permease | -0.075025844 | 0.678317 | 0.721473 |
| AB57_3498 |      | rhomboid family peptidase                       | -1.13472463  | 1.16E-25 | 1.07E-23 |
| AB57_3499 |      | hypothetical protein                            | -1.150355265 | 9.86E-12 | 7.74E-11 |
| AB57_3500 |      | hypothetical protein                            | -0.015943245 | 0.909127 | 0.926403 |
| AB57_3501 |      | hypothetical protein                            | -0.490602431 | 2.59E-06 | 8.16E-06 |
| AB57_3502 |      | acyl-CoA dehydrogenase                          | -0.063526423 | 0.567243 | 0.622094 |
| AB57_3503 |      | flavin-containing monooxygenase FMO             | -1.178814438 | 8.28E-20 | 2.64E-18 |
| AB57_3504 | rplQ | 50S ribosomal protein L17                       | 1.35212687   | 2.56E-12 | 2.26E-11 |
| AB57_3505 | rpoA | DNA-directed RNA polymerase subunit alpha       | 1.265119483  | 3.31E-11 | 2.36E-10 |
| AB57_3506 | rpsD | 30S ribosomal protein S4                        | 1.317232437  | 1.16E-10 | 7.36E-10 |
| AB57_3507 | rpsK | 30S ribosomal protein S11                       | 1.496778344  | 2.11E-12 | 1.87E-11 |
| AB57_3508 | rpsM | 30S ribosomal protein S13                       | 1.319660008  | 1.54E-10 | 9.62E-10 |
| AB57_3509 | rpmJ | 50S ribosomal protein L36                       | 0.772433712  | 4.55E-05 | 0.000115 |
| AB57_3510 | secY | preprotein translocase subunit SecY             | 0.674281556  | 0.000174 | 0.000395 |
| AB57_3511 | rplO | 50S ribosomal protein L15                       | 0.673041997  | 0.000223 | 0.000499 |
| AB57_3512 | rpmD | 50S ribosomal protein L30                       | 1.001175821  | 9.62E-08 | 3.80E-07 |
| AB57_3513 | rpsE | 30S ribosomal protein S5                        | 0.979959456  | 1.09E-07 | 4.26E-07 |
| AB57_3514 | rplR | 50S ribosomal protein L18                       | 0.953829974  | 7.35E-07 | 2.53E-06 |
| AB57_3515 |      | 50S ribosomal protein L6                        | 1.079547939  | 2.34E-08 | 1.02E-07 |
| AB57_3516 | rpsH | 30S ribosomal protein S8                        | 1.396120917  | 8.55E-12 | 6.83E-11 |
| AB57_3517 |      | 30S ribosomal protein S14                       | 1.451067331  | 2.24E-12 | 1.98E-11 |
| AB57_3518 |      | 50S ribosomal protein L5                        | 1.25760089   | 5.65E-10 | 3.23E-09 |
| AB57_3519 | rplX | 50S ribosomal protein L24                       | 1.253871162  | 1.19E-09 | 6.46E-09 |
| AB57_3520 | rplN | 50S ribosomal protein L14                       | 1.265147477  | 2.24E-10 | 1.36E-09 |
| AB57_3521 | rpsQ | 30S ribosomal protein S17                       | 0.551782806  | 0.001926 | 0.003652 |
| AB57_3522 | rpmC | 50S ribosomal protein L29                       | 0.557335103  | 0.00215  | 0.004022 |
| AB57_3523 | rplP | 50S ribosomal protein L16                       | 0.750530282  | 2.82E-05 | 7.41E-05 |
| AB57_3524 | rpsC | 30S ribosomal protein S3                        | 0.84079562   | 1.46E-06 | 4.82E-06 |
| AB57_3525 | rplV | 50S ribosomal protein L22                       | 0.964333578  | 1.58E-07 | 6.01E-07 |
| AB57_3526 | rpsS | 30S ribosomal protein S19                       | 0.994790685  | 1.28E-07 | 4.94E-07 |
| AB57_3527 | rplB | 50S ribosomal protein L2                        | 1.106199739  | 3.45E-09 | 1.72E-08 |
| AB57_3528 | rplW | 50S ribosomal protein L23                       | 1.673040743  | 4.53E-14 | 5.12E-13 |
| AB57_3529 | rplD | 50S ribosomal protein L4                        | 1.855682216  | 4.25E-16 | 7.41E-15 |
| AB57_3530 | rplC | 50S ribosomal protein L3                        | 1.955743756  | 5.61E-17 | 1.12E-15 |
| AB57_3531 | rpsJ | 30S ribosomal protein S10                       | 1.977139619  | 1.30E-16 | 2.46E-15 |
| AB57_3532 |      | glutamine amidotransferase, class I             | -0.403501275 | 0.011138 | 0.018067 |
| AB57_3533 |      | cystathionine beta-lyase PLP-dependent          | 0.195651996  | 0.054677 | 0.076782 |
| AB57_3534 |      | hypothetical protein                            | -0.392616592 | 0.000374 | 0.0008   |
| AB57_3535 |      | flavoheмоprotein                                | 0.935714446  | 8.22E-14 | 9.05E-13 |
| AB57_3536 |      | transcriptional regulator, BadM/Rrf2 family     | 0.14622863   | 0.246666 | 0.301907 |

|           |      |                                                                  |              |          |          |
|-----------|------|------------------------------------------------------------------|--------------|----------|----------|
| AB57_3537 |      | ribosome biogenesis GTP-binding protein YsxC                     | 0.708566448  | 9.18E-09 | 4.23E-08 |
| AB57_3538 |      | hypothetical protein                                             | -0.07127285  | 0.496094 | 0.555417 |
| AB57_3539 |      | sodium:dicarboxylate symporter                                   | -0.806604383 | 1.38E-09 | 7.39E-09 |
| AB57_3540 |      | acyl-CoA thioesterase                                            | 0.041353613  | 0.728367 | 0.767795 |
| AB57_3541 |      | glycerol-3-phosphate acyltransferase                             | 0.832213135  | 1.64E-06 | 5.39E-06 |
| AB57_3542 |      | putative RND type efflux pump involved in aminoglycoside resis   | -0.870585922 | 2.98E-16 | 5.35E-15 |
| AB57_3543 |      | NAD dependent epimerase/dehydratase family                       | -0.410149784 | 0.005407 | 0.009388 |
| AB57_3544 | recG | ATP-dependent DNA helicase RecG                                  | -0.318270521 | 0.002534 | 0.004669 |
| AB57_3545 |      | competence protein F                                             | -0.134103444 | 0.214302 | 0.265279 |
| AB57_3546 |      | hydrolase, NUDIX family protein                                  | 0.289429819  | 0.012772 | 0.020492 |
| AB57_3547 |      | hypothetical protein                                             | 0.28351984   | 0.004983 | 0.008704 |
| AB57_3548 |      | magnesium and cobalt transport protein                           | 0.588987953  | 8.33E-09 | 3.85E-08 |
| AB57_3549 |      | putative toluene-tolerance protein                               | 0.414071263  | 0.009048 | 0.014979 |
| AB57_3551 |      | putative toluene tolerance protein                               | 0.421175391  | 0.007155 | 0.012133 |
| AB57_3552 |      | toluene tolerance efflux transporter                             | 1.072151043  | 7.14E-10 | 4.03E-09 |
| AB57_3553 |      | toluene tolerance protein Ttg2B                                  | 1.466433253  | 1.91E-12 | 1.70E-11 |
| AB57_3554 |      | toluene tolerance efflux transporter                             | 1.338273164  | 1.05E-18 | 2.81E-17 |
| AB57_3556 |      | DEAD/DEAH box helicase                                           | 1.811802127  | 4.79E-19 | 1.36E-17 |
| AB57_3557 |      | inositol-1-monophosphatase                                       | 0.760134516  | 4.81E-05 | 0.000121 |
| AB57_3558 | dxs  | 1-deoxy-D-xylulose-5-phosphate synthase                          | 0.22062155   | 0.140013 | 0.179628 |
| AB57_3559 | ribA | GTP cyclohydrolase II                                            | 0.103482281  | 0.34371  | 0.404236 |
| AB57_3560 | hemF | coproporphyrinogen III oxidase                                   | -0.004401522 | 0.974795 | 0.980093 |
| AB57_3561 | aroE | shikimate 5-dehydrogenase                                        | 0.655574784  | 1.05E-08 | 4.75E-08 |
| AB57_3562 |      | hypothetical protein                                             | 0.653078428  | 1.84E-08 | 8.05E-08 |
| AB57_3563 |      | acyl-CoA dehydrogenase                                           | 0.126183599  | 0.500016 | 0.559438 |
| AB57_3564 |      | hypothetical protein                                             | 0.100630508  | 0.317877 | 0.376969 |
| AB57_3565 |      | phage shock protein C                                            | -0.729111393 | 2.51E-06 | 7.92E-06 |
| AB57_3566 |      | HPP domain protein                                               | -1.059395898 | 1.69E-09 | 8.89E-09 |
| AB57_3567 |      | hypothetical protein                                             | -0.337422357 | 0.01056  | 0.017181 |
| AB57_3570 |      | tetracycline resistance protein TetA                             | -0.015675482 | 0.88652  | 0.907365 |
| AB57_3571 | glyQ | glycyl-tRNA synthetase subunit alpha                             | 1.503246735  | 3.31E-15 | 4.82E-14 |
| AB57_3572 | glyS | glycyl-tRNA synthetase subunit beta                              | 1.215555185  | 3.26E-08 | 1.38E-07 |
| AB57_3573 |      | hypothetical protein                                             | 0.070750894  | 0.519189 | 0.578092 |
| AB57_3574 |      | hypothetical protein                                             | 0.287864831  | 0.006777 | 0.011514 |
| AB57_3575 |      | YCII-related protein                                             | -1.129475831 | 1.09E-22 | 5.61E-21 |
| AB57_3576 |      | hypothetical protein                                             | -0.642851105 | 7.19E-09 | 3.38E-08 |
| AB57_3577 |      | transcriptional regulator, LysR family                           | -0.40763224  | 0.014889 | 0.023463 |
| AB57_3578 |      | hypothetical protein                                             | -1.316617322 | 3.45E-18 | 8.61E-17 |
| AB57_3579 |      | hypothetical protein                                             | -1.336147518 | 2.95E-23 | 1.63E-21 |
| AB57_3580 |      | peptidase S8/S53 subtilisin                                      | -0.182860524 | 0.083544 | 0.112986 |
| AB57_3581 |      | hypothetical protein                                             | -0.245782983 | 0.129897 | 0.168225 |
| AB57_3582 |      | hypothetical protein                                             | -0.310312152 | 0.008058 | 0.013503 |
| AB57_3583 | astE | succinylglutamate desuccinylase                                  | 0.004366158  | 0.976233 | 0.981005 |
| AB57_3584 | astB | succinylarginine dihydrolase                                     | 0.315409867  | 0.059872 | 0.083595 |
| AB57_3585 | astD | succinylglutamic semialdehyde dehydrogenase                      | 1.05393425   | 5.75E-09 | 2.73E-08 |
| AB57_3586 | astA | arginine N-succinyltransferase                                   | 1.65528558   | 5.25E-19 | 1.48E-17 |
| AB57_3587 |      | bifunctional succinylornithine transaminase/acetylornithine trar | 1.539962465  | 1.45E-14 | 1.82E-13 |
| AB57_3588 |      | glutamate dehydrogenase                                          | 0.716325313  | 0.00011  | 0.00026  |
| AB57_3590 |      | amino-acid permease                                              | -0.455675428 | 0.002895 | 0.005277 |
| AB57_3591 |      | hypothetical protein                                             | 0.540907679  | 6.94E-08 | 2.80E-07 |
| AB57_3592 |      | methyltransferase type 11                                        | -0.657209463 | 8.98E-06 | 2.57E-05 |
| AB57_3593 |      | hypothetical protein                                             | -0.654553681 | 3.04E-10 | 1.81E-09 |
| AB57_3594 |      | hypothetical protein                                             | -0.841449492 | 1.09E-13 | 1.18E-12 |
| AB57_3595 |      | hypothetical protein                                             | 0.195153114  | 0.309839 | 0.368618 |
| AB57_3596 |      | cobyrinic acid a,c-diamide synthase                              | -0.506828178 | 2.02E-06 | 6.49E-06 |
| AB57_3597 |      | hypothetical protein                                             | 0.047414664  | 0.64443  | 0.690528 |
| AB57_3598 | sodC | copper/zinc superoxide dismutase                                 | -0.747570886 | 2.48E-09 | 1.27E-08 |
| AB57_3599 |      | hypothetical protein                                             | -0.589572136 | 2.54E-08 | 1.09E-07 |

|           |      |                                                          |              |          |          |
|-----------|------|----------------------------------------------------------|--------------|----------|----------|
| AB57_3600 |      | chloramphenicol resistance pump cmr                      | 0.693524312  | 3.72E-05 | 9.56E-05 |
| AB57_3601 |      | hypothetical protein                                     | -0.789719147 | 3.12E-07 | 1.13E-06 |
| AB57_3603 |      | modulator of drug activity B                             | -0.005854527 | 0.959276 | 0.967644 |
| AB57_3604 |      | hypothetical protein                                     | 0.030338102  | 0.78342  | 0.817904 |
| AB57_3605 |      | hypothetical protein                                     | -0.478625857 | 2.62E-05 | 6.92E-05 |
| AB57_3606 |      | FAD linked oxidase domain protein                        | 0.762016005  | 5.04E-07 | 1.78E-06 |
| AB57_3607 |      | D-3-phosphoglycerate dehydrogenase                       | 1.622030078  | 5.60E-15 | 7.93E-14 |
| AB57_3608 |      | hypothetical protein                                     | 0.352834908  | 0.001033 | 0.002048 |
| AB57_3609 |      | hypothetical protein                                     | -0.076593105 | 0.523373 | 0.581525 |
| AB57_3610 |      | hemerythrin                                              | -0.748117442 | 1.80E-07 | 6.79E-07 |
| AB57_3611 |      | hypothetical protein                                     | 0.528872845  | 0.000144 | 0.000333 |
| AB57_3612 | truB | tRNA pseudouridine synthase B                            | 1.029636886  | 1.00E-10 | 6.43E-10 |
| AB57_3613 |      | lipase chaperone                                         | -0.837521717 | 8.36E-05 | 0.000201 |
| AB57_3614 |      | lipase                                                   | -0.716093417 | 1.30E-11 | 9.90E-11 |
| AB57_3615 | rplS | 50S ribosomal protein L19                                | 1.431211247  | 5.15E-14 | 5.79E-13 |
| AB57_3616 | trmD | tRNA (guanine-N(1)-)-methyltransferase                   | 1.961584801  | 9.94E-18 | 2.33E-16 |
| AB57_3617 | rimM | 16S rRNA-processing protein RimM                         | 1.931498576  | 6.15E-15 | 8.61E-14 |
| AB57_3618 | rpsP | 30S ribosomal protein S16                                | 1.872471403  | 4.46E-17 | 9.22E-16 |
| AB57_3619 |      | pilin like competence factor                             | 0.081947416  | 0.580426 | 0.634679 |
| AB57_3620 |      | pilin like competence factor                             | -0.364159401 | 0.016803 | 0.026177 |
| AB57_3621 | pilY | pilus assembly protein tip-associated adhesin PilY1      | -0.453336128 | 3.73E-05 | 9.58E-05 |
| AB57_3622 | pilX | pilus assembly protein PilX                              | -0.278204827 | 0.127705 | 0.165793 |
| AB57_3623 | pilW | pilus assembly protein PilW                              | 0.121434366  | 0.524901 | 0.583048 |
| AB57_3624 | pilV | type IV pilus modification protein PilV                  | 0.01466947   | 0.945831 | 0.95669  |
| AB57_3625 | fimT | pilin protein FimT                                       | -0.51381638  | 0.025338 | 0.038171 |
| AB57_3626 | ispH | 4-hydroxy-3-methylbut-2-enyl diphosphate reductase       | -0.332415124 | 0.009948 | 0.016314 |
| AB57_3627 | gmk  | guanylate kinase                                         | 0.917019499  | 9.40E-16 | 1.54E-14 |
| AB57_3628 | rpoZ | DNA-directed RNA polymerase subunit omega                | 0.457243009  | 0.00376  | 0.006724 |
| AB57_3629 |      | guanosine-3,5-bis(diphosphate) 3-pyrophosphohydrolase    | -0.113570053 | 0.364259 | 0.424357 |
| AB57_3630 |      | hypothetical protein                                     | 0.965499143  | 9.46E-16 | 1.54E-14 |
| AB57_3631 |      | hypothetical protein                                     | -1.320740178 | 8.56E-19 | 2.36E-17 |
| AB57_3632 | bfr  | bacterioferritin                                         | -0.299687889 | 0.050618 | 0.071566 |
| AB57_3633 |      | O-antigen polymerase family                              | -0.32138125  | 0.018889 | 0.029178 |
| AB57_3634 |      | type IV pilin structural subunit                         | -0.417745243 | 0.000635 | 0.001305 |
| AB57_3635 |      | hypothetical protein                                     | -0.773234492 | 3.40E-09 | 1.70E-08 |
| AB57_3636 |      | hypothetical protein                                     | -0.787240079 | 5.79E-07 | 2.03E-06 |
| AB57_3637 |      | LemA                                                     | -1.066076761 | 1.83E-12 | 1.63E-11 |
| AB57_3638 |      | hypothetical protein                                     | -0.319980479 | 0.029826 | 0.04441  |
| AB57_3639 |      | glutamate synthase subunit beta                          | 0.660547208  | 3.67E-05 | 9.47E-05 |
| AB57_3640 | gltB | glutamate synthase subunit alpha                         | 0.664917283  | 0.001075 | 0.002123 |
| AB57_3641 |      | hypothetical protein                                     | 0.264260819  | 0.011686 | 0.018874 |
| AB57_3642 | aroB | 3-dehydroquinate synthase                                | 0.362387026  | 0.002174 | 0.004058 |
| AB57_3643 | aroK | shikimate kinase                                         | 0.333927515  | 0.003183 | 0.00577  |
| AB57_3644 | comQ | fimbrial assembly protein PilQ                           | -0.395330315 | 0.004157 | 0.00737  |
| AB57_3645 | comL | pilus assembly protein, PilQ                             | -0.030939503 | 0.87876  | 0.900918 |
| AB57_3646 | comO | pilus assembly protein, PilO                             | 0.146477518  | 0.408533 | 0.469432 |
| AB57_3647 | comN | type 4 fimbrial biogenesis protein PilN                  | 0.051296012  | 0.735499 | 0.773994 |
| AB57_3648 | comM | type IV pilus assembly protein PilM                      | -0.586568684 | 7.30E-07 | 2.51E-06 |
| AB57_3649 |      | penicillin-binding protein 1A                            | 0.35600205   | 0.022288 | 0.034034 |
| AB57_3650 |      | ribosomal RNA large subunit methyltransferase A          | 0.388792978  | 0.000322 | 0.000695 |
| AB57_3651 |      | hypothetical protein                                     | 0.257324303  | 0.063855 | 0.08862  |
| AB57_3652 | mraY | phospho-N-acetylmuramoyl-pentapeptide-transferase        | 0.620510361  | 0.000223 | 0.000499 |
| AB57_3653 |      | UDP-N-acetylmuramoylanyl-D-glutamyl-2,6-diaminopimelate- | 0.665143379  | 7.24E-06 | 2.12E-05 |
| AB57_3654 |      | UDP-N-acetylmuramoyl-tripeptide synthetase               | 0.940495009  | 4.67E-12 | 3.90E-11 |
| AB57_3655 | ftsI | peptidoglycan glycosyltransferase                        | 0.767134659  | 7.64E-07 | 2.63E-06 |
| AB57_3656 | ftsL | cell division protein FtsL                               | 0.887537408  | 1.98E-14 | 2.41E-13 |
| AB57_3657 | mraW | S-adenosyl-methyltransferase MraW                        | 0.764835159  | 2.63E-11 | 1.90E-10 |
| AB57_3658 |      | thiosulfate-binding protein                              | -1.22005554  | 1.22E-05 | 3.41E-05 |

|           |      |                                                              |              |          |          |
|-----------|------|--------------------------------------------------------------|--------------|----------|----------|
| AB57_3659 |      | hypothetical protein                                         | -0.445439006 | 0.005438 | 0.009437 |
| AB57_3660 | gltX | glutamyl-tRNA synthetase                                     | 1.321761116  | 6.76E-10 | 3.84E-09 |
| AB57_3661 |      | amino-acid permease                                          | 1.418645806  | 4.27E-13 | 4.20E-12 |
| AB57_3662 |      | hypothetical protein                                         | -0.636442821 | 6.88E-08 | 2.78E-07 |
| AB57_3663 |      | hypothetical protein                                         | -1.057703728 | 1.49E-08 | 6.69E-08 |
| AB57_3664 |      | hypothetical protein                                         | 0.162290745  | 0.242773 | 0.297535 |
| AB57_3665 |      | cation efflux system protein                                 | -0.387631773 | 0.00011  | 0.000259 |
| AB57_3666 |      | cation efflux system protein                                 | -0.018974259 | 0.871815 | 0.895286 |
| AB57_3667 |      | cation efflux system protein (EsvF1)                         | -0.338220919 | 0.00245  | 0.004529 |
| AB57_3668 |      | cation efflux system protein                                 | -0.369846187 | 0.001339 | 0.002595 |
| AB57_3669 |      | cation efflux system protein                                 | -0.823818052 | 4.16E-11 | 2.90E-10 |
| AB57_3670 |      | hypothetical protein                                         | -0.518552187 | 8.03E-06 | 2.32E-05 |
| AB57_3672 |      | putative ABC transporter ATP-binding protein                 | 1.992991589  | 8.40E-18 | 1.99E-16 |
| AB57_3673 |      | O-acetylhomoserine/O-acetylserine sulfhydrylase              | -1.277786452 | 4.54E-08 | 1.88E-07 |
| AB57_3674 |      | acyl coenzyme A reductase                                    | 2.676361601  | 2.04E-28 | 2.69E-26 |
| AB57_3675 |      | sulfate transporter                                          | -0.660222708 | 1.01E-07 | 3.95E-07 |
| AB57_3676 |      | RNA binding S1 domain protein                                | 1.323549846  | 4.25E-13 | 4.19E-12 |
| AB57_3677 |      | osmolarity response regulator                                | -0.719591487 | 1.93E-06 | 6.23E-06 |
| AB57_3678 |      | two-component system sensory histidine kinase                | -0.357871864 | 0.002069 | 0.003888 |
| AB57_3679 |      | succinyl-CoA:coenzyme A transferase                          | 0.815858193  | 2.04E-07 | 7.61E-07 |
| AB57_3680 |      | putative acetyltransferase                                   | -0.110092082 | 0.474634 | 0.534921 |
| AB57_3681 |      | hypothetical protein                                         | -1.005449476 | 2.83E-17 | 6.02E-16 |
| AB57_3682 | hisB | imidazoleglycerol-phosphate dehydratase                      | 0.47376303   | 3.90E-05 | 0.0001   |
| AB57_3683 | hisH | imidazole glycerol phosphate synthase subunit HisH           | 0.880197076  | 1.06E-14 | 1.38E-13 |
| AB57_3684 |      | hypothetical protein                                         | 0.291961773  | 0.025585 | 0.038481 |
| AB57_3687 | hisA | 1-(5-phosphoribosyl)-5-[(5-phosphoribosylamino)methylideneam | 1.532625361  | 2.34E-19 | 7.11E-18 |
| AB57_3688 |      | transcriptional regulator, XRE family                        | 0.21303781   | 0.260144 | 0.316415 |
| AB57_3689 |      | hypothetical protein                                         | -0.579942428 | 7.52E-06 | 2.19E-05 |
| AB57_3690 |      | hypothetical protein                                         | -0.913423454 | 1.16E-09 | 6.26E-09 |
| AB57_3691 |      | cold-shock DNA-binding domain protein                        | -0.737766246 | 4.98E-13 | 4.85E-12 |
| AB57_3692 |      | homoserine kinase                                            | 0.45255722   | 3.74E-05 | 9.60E-05 |
| AB57_3693 | hisF | imidazole glycerol phosphate synthase subunit HisF           | 0.286790988  | 0.008618 | 0.014356 |
| AB57_3694 |      | hypothetical protein                                         | -0.181481917 | 0.256948 | 0.313145 |
| AB57_3695 |      | transcriptional regulator, AraC family                       | -0.797432289 | 1.21E-05 | 3.39E-05 |
| AB57_3696 |      | aquaporin Z                                                  | -0.304425642 | 0.005972 | 0.010278 |
| AB57_3698 |      | hypothetical protein                                         | -0.666422312 | 1.64E-09 | 8.67E-09 |
| AB57_3699 |      | transporter LysE family                                      | -0.334097366 | 0.006434 | 0.010986 |
| AB57_3700 |      | DNA/RNA non-specific endonuclease G protein                  | -0.333991194 | 0.004541 | 0.007994 |
| AB57_3701 |      | hypothetical protein                                         | -0.322488548 | 0.002877 | 0.005248 |
| AB57_3704 |      | acetyltransferase, gnat family                               | -0.486215376 | 0.001211 | 0.00237  |
| AB57_3705 |      | transcriptional regulator, AraC family                       | -0.584811262 | 2.48E-07 | 9.13E-07 |
| AB57_3706 |      | NAD(P)H oxidoreductase                                       | -0.402099163 | 0.068328 | 0.094123 |
| AB57_3707 |      | transcriptional regulator, MarR family                       | -1.009676974 | 6.76E-12 | 5.47E-11 |
| AB57_3708 |      | hypothetical protein                                         | -0.498580685 | 5.52E-05 | 0.000137 |
| AB57_3709 |      | hypothetical protein                                         | -0.204610249 | 0.171748 | 0.21718  |
| AB57_3710 |      | transcriptional regulator, HxLR family                       | -0.262970667 | 0.015171 | 0.023825 |
| AB57_3711 |      | hypothetical protein                                         | -0.771914349 | 1.86E-06 | 6.05E-06 |
| AB57_3712 |      | transcriptional regulator, TetR family                       | -0.432168369 | 0.051062 | 0.072138 |
| AB57_3713 |      | transcriptional regulator, AraC family                       | -0.080088392 | 0.513288 | 0.57221  |
| AB57_3714 |      | aldo-keto reductase                                          | 0.038574144  | 0.737474 | 0.775847 |
| AB57_3715 |      | hypothetical protein                                         | -0.43974879  | 0.002456 | 0.004539 |
| AB57_3716 |      | hypothetical protein                                         | -0.469674618 | 0.000131 | 0.000304 |
| AB57_3717 |      | transcriptional regulator, LysR family                       | -0.019779784 | 0.898696 | 0.917462 |
| AB57_3718 |      | permease                                                     | -0.053362098 | 0.710799 | 0.752276 |
| AB57_3719 |      | major facilitator family transporter                         | 1.075297338  | 2.14E-06 | 6.83E-06 |
| AB57_3721 |      | hypothetical protein                                         | -0.729497463 | 1.30E-06 | 4.34E-06 |
| AB57_3722 |      | methyltransferase                                            | -0.005324005 | 0.963178 | 0.970787 |
| AB57_3723 |      | hypothetical protein                                         | 0.549057957  | 9.78E-07 | 3.32E-06 |



|           |      |                                                              |              |          |          |
|-----------|------|--------------------------------------------------------------|--------------|----------|----------|
| AB57_3724 |      | pirin family protein                                         | 0.181494772  | 0.087511 | 0.1177   |
| AB57_3725 |      | isochorismate hydrolase                                      | 0.292650751  | 0.031539 | 0.04664  |
| AB57_3726 |      | transcriptional regulator, LysR family                       | -0.495231117 | 8.69E-06 | 2.49E-05 |
| AB57_3727 |      | succinate-semialdehyde dehydrogenase (NADP+)                 | -0.245816506 | 0.070163 | 0.096472 |
| AB57_3728 | gabT | 4-aminobutyrate transaminase                                 | 0.083845465  | 0.440705 | 0.502034 |
| AB57_3729 |      | transcriptional regulator, GntR family                       | -0.084209968 | 0.438621 | 0.499815 |
| AB57_3730 |      | GABA permease                                                | -0.188394886 | 0.094119 | 0.125537 |
| AB57_3731 |      | transcriptional regulator, XRE family                        | 0.345674444  | 0.004463 | 0.007882 |
| AB57_3732 |      | hypothetical protein                                         | 0.185872306  | 0.192048 | 0.240548 |
| AB57_3733 |      | branched-chain amino acid transport                          | 0.085989459  | 0.657339 | 0.702742 |
| AB57_3734 | ssb  | single-strand binding protein                                | 0.440895151  | 0.002521 | 0.00465  |
| AB57_3735 |      | major facilitator family transporter                         | -0.040357243 | 0.758913 | 0.794786 |
| AB57_3736 |      | hypothetical protein                                         | 0.530121484  | 0.002687 | 0.004927 |
| AB57_3737 |      | transcriptional regulator, TenA family                       | 0.965106242  | 1.78E-17 | 3.97E-16 |
| AB57_3738 |      | GlpM family protein                                          | -0.171221353 | 0.186003 | 0.233767 |
| AB57_3739 |      | hypothetical protein                                         | -0.411924438 | 0.00028  | 0.000614 |
| AB57_3740 |      | alcohol dehydrogenase, zinc-binding                          | 0.488781582  | 1.64E-06 | 5.39E-06 |
| AB57_3741 |      | transcriptional regulator, TetR family                       | 0.520021005  | 0.000155 | 0.000356 |
| AB57_3742 | uvrA | excinuclease ABC, A subunit                                  | 0.21788802   | 0.151442 | 0.192886 |
| AB57_3743 |      | GGDEF family protein                                         | 0.066707076  | 0.629795 | 0.677199 |
| AB57_3744 |      | hypothetical protein                                         | 1.45291543   | 9.44E-12 | 7.45E-11 |
| AB57_3745 |      | high-affinity choline transport protein                      | 0.13112329   | 0.44897  | 0.508943 |
| AB57_3746 |      | hypothetical protein                                         | -0.249475687 | 0.155168 | 0.197429 |
| AB57_3747 |      | acetate permease                                             | -0.585831434 | 0.000285 | 0.000623 |
| AB57_3748 |      | hypothetical protein                                         | -0.665110614 | 8.05E-09 | 3.74E-08 |
| AB57_3749 |      | two-component system hybrid histidine kinase/response regula | -0.194823012 | 0.070257 | 0.096564 |
| AB57_3750 |      | hypothetical protein                                         | -0.69349209  | 1.45E-05 | 3.98E-05 |
| AB57_3751 |      | two-component system response regulator protein              | 0.094893412  | 0.343989 | 0.404307 |
| AB57_3752 |      | NADH-dependent fmn reductase                                 | -1.199337304 | 3.49E-06 | 1.07E-05 |
| AB57_3753 |      | alkanesulfonate monooxygenase                                | -1.467211032 | 5.34E-05 | 0.000133 |
| AB57_3754 |      | transcriptional regulator, AsnC/Lrp family                   | -0.675018195 | 5.18E-07 | 1.83E-06 |
| AB57_3755 |      | amidase                                                      | -0.152717916 | 0.393614 | 0.453981 |
| AB57_3756 | acsA | acetate--CoA ligase                                          | -0.869264631 | 2.81E-08 | 1.20E-07 |
| AB57_3758 |      | hypothetical protein                                         | -0.38830414  | 0.001296 | 0.00252  |
| AB57_3759 |      | 16S ribosomal RNA methyltransferase RsmE                     | 0.192189869  | 0.081981 | 0.11111  |
| AB57_3760 |      | MscS Mechanosensitive ion channel                            | 0.552914754  | 6.91E-05 | 0.000168 |
| AB57_3761 | kdtA | 3-deoxy-D-manno-2-octulosonate transferase                   | 0.404538673  | 0.000136 | 0.000316 |
| AB57_3762 |      | N-ethylmaleimide reductase                                   | 0.732798891  | 3.09E-09 | 1.56E-08 |
| AB57_3763 |      | transcriptional regulator, ArsR family                       | 0.374666715  | 0.003806 | 0.006797 |
| AB57_3765 | prfB | peptide chain release factor 2                               | 1.601771342  | 8.52E-17 | 1.68E-15 |
| AB57_3766 |      | hypothetical protein                                         | -0.590626025 | 0.000131 | 0.000304 |
| AB57_3767 | recJ | single-stranded-DNA-specific exonuclease RecJ                | 0.541756314  | 1.99E-05 | 5.35E-05 |
| AB57_3768 | pdxH | pyridoxamine 5'-phosphate oxidase                            | 0.76863406   | 5.04E-09 | 2.41E-08 |
| AB57_3769 | glmM | phosphoglucosamine mutase                                    | 0.271444069  | 0.056764 | 0.079556 |
| AB57_3770 | guaB | inosine-5'-monophosphate dehydrogenase                       | 1.302790922  | 2.83E-13 | 2.87E-12 |
| AB57_3771 |      | putative ferredoxin                                          | 0.086229146  | 0.607459 | 0.658347 |
| AB57_3772 |      | metallo-beta-lactamase family protein                        | -0.141955903 | 0.304551 | 0.363263 |
| AB57_3773 |      | TonB-dependent receptor protein                              | -0.099279103 | 0.346547 | 0.406797 |
| AB57_3774 |      | hypothetical protein                                         | -0.082891128 | 0.473663 | 0.534019 |
| AB57_3775 |      | hypothetical protein                                         | -0.817603748 | 2.79E-12 | 2.45E-11 |
| AB57_3776 | aceF | pyruvate dehydrogenase complex dihydrolipoamide acetyltrans  | -0.288812197 | 0.081978 | 0.11111  |
| AB57_3777 | aceE | pyruvate dehydrogenase subunit E1                            | 0.027227929  | 0.870157 | 0.894329 |
| AB57_3778 |      | peptidase, M23/M37 family (EsvJ)                             | 0.396618146  | 0.002821 | 0.005149 |
| AB57_3779 |      | hypothetical protein                                         | 0.313565222  | 0.001898 | 0.003603 |
| AB57_3780 |      | UDP-3-O-[3-hydroxymyristoyl] N-acetylglucosamine deacetylase | 0.597959858  | 8.85E-07 | 3.02E-06 |
| AB57_3781 |      | UDP-3-O-[3-hydroxymyristoyl] N-acetylglucosamine deacetylase | 0.693227366  | 1.55E-10 | 9.67E-10 |
| AB57_3782 | ftsZ | cell division protein FtsZ                                   | 0.983360654  | 3.08E-08 | 1.31E-07 |
| AB57_3783 | ftsA | cell division protein FtsA                                   | 0.81733173   | 7.19E-07 | 2.48E-06 |

|           |      |                                                           |              |          |          |
|-----------|------|-----------------------------------------------------------|--------------|----------|----------|
| AB57_3784 | ftsQ | cell division protein FtsQ                                | 0.336626717  | 0.009272 | 0.015309 |
| AB57_3785 |      | D-alanine--D-alanine ligase                               | 0.437186089  | 0.001357 | 0.002627 |
| AB57_3786 | murC | UDP-N-acetylmuramate--L-alanine ligase                    | 1.076234564  | 3.24E-10 | 1.92E-09 |
| AB57_3787 | murG | undecaprenyldiphospho-muramoylpentapeptide beta-N- acetyl | 0.224262996  | 0.048284 | 0.068422 |
| AB57_3788 | gshB | glutathione synthetase                                    | 0.080213906  | 0.444302 | 0.505044 |
| AB57_3789 |      | hypothetical protein                                      | -0.13161313  | 0.468867 | 0.529389 |
| AB57_3790 |      | TonB-dependent receptor protein                           | 0.241591704  | 0.103293 | 0.136738 |
| AB57_3791 | pyrE | orotate phosphoribosyltransferase                         | 1.687072664  | 1.95E-29 | 3.28E-27 |
| AB57_3792 | xth  | exodeoxyribonuclease III                                  | 0.443420265  | 2.63E-05 | 6.96E-05 |
| AB57_3793 |      | putative arsenate reductase                               | -0.060971969 | 0.582731 | 0.636583 |
| AB57_3794 |      | hypothetical protein                                      | -0.252713802 | 0.110332 | 0.144968 |
| AB57_3795 |      | esterase                                                  | -0.465527743 | 1.15E-05 | 3.24E-05 |
| AB57_3796 |      | thiol:disulfide interchange protein                       | 0.452926248  | 0.000297 | 0.000646 |
| AB57_3797 |      | GGDEF family protein                                      | -0.537247252 | 1.67E-05 | 4.54E-05 |
| AB57_3798 |      | hypothetical protein                                      | 0.732495221  | 3.81E-09 | 1.89E-08 |
| AB57_3799 |      | hypothetical protein                                      | 0.555705089  | 3.04E-08 | 1.30E-07 |
| AB57_3800 |      | hypothetical protein                                      | -0.646737418 | 4.14E-05 | 0.000106 |
| AB57_3801 |      | polysaccharide deacetylase                                | 0.070762179  | 0.600788 | 0.652264 |
| AB57_3802 |      | putative OHCU decarboxylase                               | -0.305058378 | 0.085914 | 0.115635 |
| AB57_3803 |      | transthyretin                                             | -0.25096533  | 0.223436 | 0.275571 |
| AB57_3804 |      | uracil-xanthine permease                                  | -0.380104958 | 0.000956 | 0.001907 |
| AB57_3805 |      | hypothetical protein                                      | 2.005771591  | 8.24E-18 | 1.97E-16 |
| AB57_3806 |      | monooxygenase, FAD-binding                                | -0.301263208 | 0.203606 | 0.25348  |
| AB57_3807 | allC | allantoicase                                              | 0.074911175  | 0.640673 | 0.687497 |
| AB57_3808 | allA | ureidoglycolate hydrolase                                 | -0.562533442 | 0.000159 | 0.000362 |
| AB57_3809 | parE | DNA topoisomerase IV subunit B                            | 0.615898665  | 3.07E-08 | 1.30E-07 |
| AB57_3810 |      | putative esterase                                         | -0.090959207 | 0.470057 | 0.530409 |
| AB57_3811 |      | PGAP1 family protein                                      | -0.37249378  | 0.003266 | 0.005904 |
| AB57_3812 |      | hypothetical protein                                      | -0.391250986 | 0.004384 | 0.00775  |
| AB57_3813 |      | hypothetical protein                                      | 0.396940724  | 0.000738 | 0.001501 |
| AB57_3814 |      | hypothetical protein                                      | -0.654204379 | 6.94E-05 | 0.000169 |
| AB57_3815 |      | hypothetical protein                                      | -0.53046915  | 1.15E-06 | 3.86E-06 |
| AB57_3816 |      | LysM domain protein                                       | -0.302448431 | 0.005624 | 0.009729 |
| AB57_3817 |      | hypothetical protein                                      | 0.968231118  | 1.38E-10 | 8.70E-10 |
| AB57_3818 |      | disulfide bond formation protein                          | -0.96223889  | 2.68E-14 | 3.19E-13 |
| AB57_3819 | gshA | glutamate--cysteine ligase                                | 0.124658832  | 0.257507 | 0.31362  |
| AB57_3820 |      | hypothetical protein                                      | -0.514390692 | 0.000153 | 0.000351 |
| AB57_3821 |      | hypothetical protein                                      | -0.546372583 | 1.15E-07 | 4.47E-07 |
| AB57_3822 |      | hypothetical protein                                      | -0.15108019  | 0.158378 | 0.201166 |
| AB57_3823 |      | putative aminotransferase                                 | -0.101961652 | 0.349473 | 0.409452 |
| AB57_3824 |      | MATE efflux family protein                                | -0.931890055 | 6.80E-16 | 1.14E-14 |
| AB57_3825 |      | short-chain dehydrogenase/reductase                       | 0.31194217   | 0.094205 | 0.125606 |
| AB57_3826 |      | transcriptional regulator, TetR family                    | -0.204405826 | 0.114759 | 0.150198 |
| AB57_3827 | phoB | phosphate regulon transcriptional regulatory protein PhoB | 0.685338372  | 1.15E-11 | 8.87E-11 |
| AB57_3828 | phoR | phosphate regulon sensor kinase PhoR                      | 0.507906193  | 2.58E-07 | 9.46E-07 |
| AB57_3829 |      | hypothetical protein                                      | -0.572753777 | 1.50E-08 | 6.71E-08 |
| AB57_3830 | psd  | phosphatidylserine decarboxylase                          | 1.098847171  | 4.41E-14 | 5.02E-13 |
| AB57_3831 |      | hypothetical protein                                      | 0.291485112  | 0.004498 | 0.007933 |
| AB57_3832 | pncB | nicotinate phosphoribosyltransferase                      | -0.162509354 | 0.159704 | 0.202712 |
| AB57_3833 | dtd  | D-tyrosyl-tRNA(Tyr) deacylase                             | 0.154982637  | 0.22698  | 0.279662 |
| AB57_3834 |      | hypothetical protein                                      | 0.362262923  | 0.005968 | 0.010276 |
| AB57_3835 |      | hypothetical protein                                      | -0.681671877 | 1.34E-05 | 3.71E-05 |
| AB57_3836 |      | phosphoserine phosphatase                                 | 0.313618467  | 0.005391 | 0.009364 |
| AB57_3837 |      | hypothetical protein                                      | 0.594846234  | 4.86E-05 | 0.000122 |
| AB57_3838 |      | 3,4-dihydroxy-2-butanone 4-phosphate synthase             | 0.922428675  | 2.82E-09 | 1.43E-08 |
| AB57_3839 | ribH | 6,7-dimethyl-8-ribityllumazine synthase                   | 1.18703597   | 6.60E-15 | 9.11E-14 |
| AB57_3840 | nusB | transcription antitermination protein NusB                | 1.022660155  | 1.80E-13 | 1.86E-12 |
| AB57_3841 | thiL | thiamine-monophosphate kinase                             | 0.712275515  | 5.17E-11 | 3.54E-10 |

|           |      |                                                            |              |          |          |
|-----------|------|------------------------------------------------------------|--------------|----------|----------|
| AB57_3843 | pgpA | phosphatidylglycerophosphatase A                           | 0.381425867  | 0.000155 | 0.000355 |
| AB57_3844 | glmU | UDP-N-acetylglucosamine diphosphorylase/glucosamine-1-phos | 1.236130708  | 4.63E-14 | 5.22E-13 |
| AB57_3845 | glmS | glucosamine--fructose-6-phosphate aminotransferase         | 1.275322005  | 5.94E-10 | 3.39E-09 |
| AB57_3846 |      | hypothetical protein                                       | -0.069358311 | 0.606314 | 0.657684 |
| AB57_3847 |      | hypothetical protein                                       | 0.216894593  | 0.136451 | 0.175668 |
| AB57_3848 |      | hypothetical protein                                       | 0.169120947  | 0.11988  | 0.156237 |
| AB57_3849 |      | hypothetical protein                                       | 0.065869366  | 0.528601 | 0.586278 |
| AB57_3850 |      | histidine kinase                                           | 0.223180338  | 0.042324 | 0.060815 |
| AB57_3851 |      | DNA cytosine methyltransferase                             | 0.415554729  | 6.86E-05 | 0.000167 |
| AB57_3852 |      | hypothetical protein                                       | 0.126316818  | 0.430592 | 0.491528 |
| AB57_3853 | murl | glutamate racemase                                         | 0.084332164  | 0.535951 | 0.593541 |
| AB57_3854 |      | haloacid dehydrogenase                                     | -0.586904117 | 0.000742 | 0.00151  |
| AB57_3855 |      | hypothetical protein                                       | -0.484388365 | 0.000736 | 0.001499 |
| AB57_3856 | hutG | formimidoylglutamase                                       | -0.309304759 | 0.005518 | 0.009563 |
| AB57_3857 | hutI | imidazolonepropionase                                      | -0.309346631 | 0.016746 | 0.0261   |
| AB57_3858 |      | proline-specific permease ProY                             | -0.043975442 | 0.797306 | 0.831464 |
| AB57_3859 | hutH | histidine ammonia-lyase                                    | 0.104630561  | 0.507076 | 0.566138 |
| AB57_3860 | hutU | urocanate hydratase                                        | -0.19839956  | 0.199139 | 0.248588 |
| AB57_3861 |      | hypothetical protein                                       | 0.564615974  | 1.49E-05 | 4.08E-05 |
| AB57_3862 | hutC | histidine utilization repressor                            | 0.343465424  | 0.001378 | 0.002665 |
| AB57_3863 |      | acyltransferase 3                                          | -0.327682663 | 0.002198 | 0.004096 |
| AB57_3864 |      | CobW/P47K family protein                                   | -0.406831634 | 0.045748 | 0.065078 |
| AB57_3865 |      | peptidase M15 family                                       | -0.474239416 | 0.017544 | 0.027252 |
| AB57_3866 |      | aromatic amino acid transport protein                      | -0.989377684 | 6.34E-14 | 7.07E-13 |
| AB57_3867 | fahA | fumarylacetoacetase                                        | -1.373447515 | 1.82E-15 | 2.79E-14 |
| AB57_3868 | maiA | maleylacetoacetate isomerase                               | -1.151056106 | 6.25E-24 | 3.92E-22 |
| AB57_3869 |      | glyoxalase/bleomycin resistance protein/dioxygenase        | -0.618386064 | 3.34E-06 | 1.03E-05 |
| AB57_3870 |      | transcriptional regulator, IclR family                     | 0.133690758  | 0.179845 | 0.226644 |
| AB57_3871 | hpdD | 4-hydroxyphenylpyruvate dioxygenase                        | -0.287358766 | 0.083267 | 0.112729 |
| AB57_3872 |      | hypothetical protein                                       | -0.352805554 | 0.107037 | 0.141089 |
| AB57_3873 |      | MATE family drug transporter                               | -0.698499759 | 4.26E-07 | 1.52E-06 |
| AB57_3874 |      | bile acid:sodium symporter                                 | -0.624502471 | 2.69E-08 | 1.15E-07 |
| AB57_3875 |      | nicotinamidase                                             | -0.325822707 | 0.012989 | 0.020787 |
| AB57_3876 | dapA | dihydrodipicolinate synthase                               | 0.669157328  | 3.32E-05 | 8.64E-05 |
| AB57_3877 |      | hypothetical protein                                       | 0.761912378  | 1.23E-07 | 4.76E-07 |
| AB57_3878 | purC | phosphoribosylaminoimidazole-succinocarboxamide synthase   | 1.203899431  | 1.49E-11 | 1.13E-10 |
| AB57_3879 |      | hypothetical protein                                       | -1.15199323  | 2.51E-18 | 6.48E-17 |
| AB57_3880 |      | formate/nitrite transporter family                         | -0.577090174 | 2.75E-05 | 7.26E-05 |
| AB57_3881 |      | recombination factor protein RarA                          | -0.11695605  | 0.250564 | 0.306171 |
| AB57_3882 |      | glucose sorbosone dehydrogenase                            | -0.712067168 | 4.29E-09 | 2.11E-08 |
| AB57_3883 |      | hypothetical protein                                       | -0.315390943 | 0.030613 | 0.045453 |
| AB57_3884 |      | hypothetical protein                                       | -1.364517245 | 3.82E-13 | 3.80E-12 |
| AB57_3885 |      | dienelactone hydrolase                                     | 0.623278085  | 3.25E-09 | 1.63E-08 |
| AB57_3886 |      | histidine triad protein                                    | 0.554954076  | 5.06E-06 | 1.52E-05 |
| AB57_3887 | mutY | A/G-specific adenine glycosylase                           | 1.107464248  | 3.22E-21 | 1.34E-19 |
| AB57_3888 |      | peptidase                                                  | 0.201346788  | 0.142546 | 0.182562 |
| AB57_3889 |      | hypothetical protein                                       | 0.762243242  | 4.59E-08 | 1.89E-07 |
| AB57_3890 |      | DNA-3-methyladenine glycosylase 1                          | 0.354920915  | 0.002121 | 0.003978 |
| AB57_3891 |      | hypothetical protein                                       | 0.373334767  | 0.000423 | 0.000899 |
| AB57_3892 |      | transcriptional regulator, GntR family                     | -0.209055702 | 0.081535 | 0.110586 |
| AB57_3894 |      | transcriptional regulator, LysR family                     | 0.062072515  | 0.660506 | 0.705474 |
| AB57_3895 |      | hypothetical protein                                       | 0.009063168  | 0.966783 | 0.973094 |
| AB57_3896 |      | 2,5-diketo-D-gluconate reductase B                         | -0.5496227   | 1.39E-07 | 5.33E-07 |
| AB57_3897 |      | major facilitator family transporter                       | -0.324574395 | 0.002598 | 0.004778 |
| AB57_3898 |      | hypothetical protein                                       | 0.35890754   | 0.000467 | 0.000983 |
| AB57_3899 | dapB | dihydrodipicolinate reductase                              | 0.489604405  | 0.000224 | 0.000501 |
| AB57_3900 |      | hypothetical protein                                       | 0.745500294  | 3.59E-06 | 1.10E-05 |
| AB57_3901 | dnaJ | chaperone protein DnaJ                                     | 0.425444401  | 0.006113 | 0.010505 |

|                           |           |                                                 |                     |          |          |
|---------------------------|-----------|-------------------------------------------------|---------------------|----------|----------|
| AB57_3902                 |           | hypothetical protein                            | 0.096748714         | 0.377654 | 0.43762  |
| AB57_3903                 |           | RND efflux transporter                          | -0.004475103        | 0.979176 | 0.982895 |
| AB57_3904                 |           | secretion protein HlyD                          | -0.028845813        | 0.827689 | 0.856868 |
| AB57_3905                 |           | transcriptional regulator, TetR family          | 0.215265909         | 0.104679 | 0.138474 |
| AB57_3906                 | ppc       | phosphoenolpyruvate carboxylase                 | -0.133416151        | 0.306427 | 0.365382 |
| AB57_3907                 |           | uracil-xanthine permease                        | <b>1.128411122</b>  | 9.95E-11 | 6.41E-10 |
| AB57_3908                 |           | transcriptional regulator, LysR family          | -0.328690052        | 0.003323 | 0.00599  |
| AB57_3909                 |           | hypothetical protein                            | -0.099746901        | 0.361794 | 0.421884 |
| AB57_3910                 |           | hypothetical protein                            | -0.186811221        | 0.064101 | 0.088895 |
| AB57_3911                 | ilvD      | dihydroxy-acid dehydratase                      | 0.459834082         | 0.000614 | 0.001265 |
| AB57_3912                 | fmt       | methionyl-tRNA formyltransferase                | <b>0.987257768</b>  | 5.64E-13 | 5.45E-12 |
| AB57_3913                 | sun       | ribosomal RNA small subunit methyltransferase B | <b>0.992649832</b>  | 9.12E-12 | 7.23E-11 |
| AB57_3914                 |           | hypothetical protein                            | <b>-0.692931827</b> | 1.59E-11 | 1.20E-10 |
| AB57_3915                 |           | sodium-and chloride-dependent transporter       | -0.366210436        | 0.008918 | 0.014804 |
| AB57_3916                 |           | hypothetical protein                            | -0.018665619        | 0.892741 | 0.91247  |
| AB57_3917                 |           | hypothetical protein                            | <b>0.604666128</b>  | 1.91E-06 | 6.17E-06 |
| AB57_3918                 |           | glutathione S-transferase                       | -0.392240597        | 0.003721 | 0.00666  |
| AB57_4802                 | AB57_4802 | NA                                              | <b>1.495818655</b>  | 4.83E-09 | 2.32E-08 |
| AB57_4846                 | AB57_4846 | NA                                              | <b>-0.58544589</b>  | 0.003896 | 0.00694  |
| AB57_4852                 | AB57_4852 | NA                                              | <b>1.061091501</b>  | 6.40E-07 | 2.23E-06 |
| AB57_4864                 | AB57_4864 | NA                                              | <b>1.808119109</b>  | 0.001263 | 0.002463 |
| AB57_4870                 | AB57_4870 | NA                                              | <b>2.003991143</b>  | 7.81E-05 | 0.000189 |
| AB57_4871                 | AB57_4871 | NA                                              | <b>1.808977683</b>  | 0.003277 | 0.00592  |
| EBG000012374 6S           |           | NA                                              | <b>-0.724158338</b> | 0.001919 | 0.003642 |
| EBG000012374 Aar          |           | NA                                              | <b>-0.602836987</b> | 0.000108 | 0.000256 |
| EBG000012374 C4           |           | NA                                              | 0.127556605         | 0.705825 | 0.748081 |
| EBG000012374 C4           |           | NA                                              | -0.064953951        | 0.749969 | 0.787202 |
| EBG000012374 C4           |           | NA                                              | -0.278049797        | 0.213535 | 0.26447  |
| EBG000012375 C4           |           | NA                                              | 0.319985389         | 0.230494 | 0.283783 |
| EBG000012375 C4           |           | NA                                              | 0.370615578         | 0.048635 | 0.068868 |
| EBG000012375 C4           |           | NA                                              | -0.103658126        | 0.607158 | 0.658214 |
| EBG000012375 C4           |           | NA                                              | 0.16203709          | 0.479005 | 0.539492 |
| EBG000012375 C4           |           | NA                                              | -0.238740296        | 0.175296 | 0.221288 |
| EBG000012375 C4           |           | NA                                              | <b>-0.695130054</b> | 0.002316 | 0.004302 |
| EBG000012375 C4           |           | NA                                              | -0.034048801        | 0.900844 | 0.918975 |
| EBG000012375 C4           |           | NA                                              | -0.160600996        | 0.50078  | 0.560123 |
| EBG000012375 C4           |           | NA                                              | -0.353513331        | 0.180911 | 0.227832 |
| EBG000012375 RNaseP_bact_ |           | NA                                              | -0.160368616        | 0.611968 | 0.661877 |
| EBG000012375 C4           |           | NA                                              | 0.296612823         | 0.293797 | 0.351795 |
| EBG000012375 tmRNA        |           | NA                                              | -0.337579551        | 0.136104 | 0.175282 |
| EBG000012375 C4           |           | NA                                              | -0.085889909        | 0.70327  | 0.745801 |
| EBG000012375 C4           |           | NA                                              | -0.21937242         | 0.350598 | 0.41064  |
| EBG000012375 C4           |           | NA                                              | -0.037938079        | 0.879574 | 0.901502 |
| EBG000012375 C4           |           | NA                                              | 0.302678087         | 0.272161 | 0.328976 |
| EBG000012375 t44          |           | NA                                              | <b>0.840452945</b>  | 2.54E-05 | 6.73E-05 |
| EBG000012375 C4           |           | NA                                              | 0.085365399         | 0.764267 | 0.79994  |
| EBG000012375 C4           |           | NA                                              | -0.013069399        | 0.961002 | 0.968858 |

Supplemental Table 3: Differential expression by qRT-PCR of select genes from *A. baumannii*

| Gene ID   | Product                 | log <sub>2</sub> FC |          |
|-----------|-------------------------|---------------------|----------|
|           |                         | RNA-seq             | qRT-PCR  |
| AB57_2007 | P-pili fimbrial subunit | 1.2632903           | 2.1743   |
| AB57_0091 | Tyrosine kinase ptk     | 0.90987727          | 2.462005 |
| AB57_2570 | CsuA/B                  | 1.37926436          | 2.861655 |
| AB57_1479 | T6SS protein, TssB      | 1.43090804          | 6.579703 |
| AB57_1527 | PaaJ                    | 0.55521847          | 5.902565 |
